# Supplementary material for: Screening of metal complexes and organic solvents using the COSMOSAC-LANL model to enhance the energy density in a non-aqueous redox flow cell: an insight into the solubility
Source: Royal Society of Chemistry journal article supplement (doi:10.1039/d1cp02591k), 2021-01-01
Supplement: d1cp02591k1.pdf [file d1cp02591k1.pdf]

## Supporting Information

# Screening of metal complexes and organic solvents using COSMOSAC-LANL model to enhance the energy density in non-aqueous redox flow cell: an insight into the solubility

Anwesa Karmakar\*<sup>†</sup>, Rangachary Mukundan<sup>‡</sup>, Ping Yang\*<sup>†</sup> and Enrique R. Batista\*<sup>†</sup>

<sup>†</sup>Theoretical Division, Los Alamos National Laboratory, Los Alamos 87545

<sup>‡</sup>MPA-11 Division, Los Alamos National Laboratory, Los Alamos 87545

\*E-mail: anwesa.karmakar@gmail.com; pyang@lanl.gov; erb@lanl.gov

## Input files and co-ordinate for metal complexes and organic solvents

```
#!/bin/sh
```

```
# =====  
# The Molecule  
# =====
```

```
"$ADFBIN/adf" <<eor  
TITLE metalcomplex-l
```

### ATOMS

|      |                 |                 |                 |         |
|------|-----------------|-----------------|-----------------|---------|
| 1 V  | 9.728500000000  | 9.731800000000  | 12.193700000000 | R=1.908 |
| 2 O  | 10.632300000000 | 10.717600000000 | 13.636500000000 | R=1.72  |
| 3 O  | 11.225000000000 | 8.388600000000  | 12.254300000000 | R=1.72  |
| 4 O  | 10.708700000000 | 10.925800000000 | 10.919000000000 | R=1.72  |
| 5 O  | 9.016700000000  | 8.813400000000  | 10.582800000000 | R=1.72  |
| 6 O  | 8.216900000000  | 11.024800000000 | 12.208900000000 | R=1.72  |
| 7 O  | 8.713000000000  | 8.589800000000  | 13.425700000000 | R=1.72  |
| 8 C  | 11.766000000000 | 10.477300000000 | 14.190100000000 | R=2.00  |
| 9 C  | 12.541600000000 | 9.365700000000  | 13.949300000000 | R=2.00  |
| 10 H | 13.346100000000 | 9.273700000000  | 14.446000000000 | R=1.30  |
| 11 C | 12.231200000000 | 8.357000000000  | 13.022700000000 | R=2.00  |
| 12 C | 12.224400000000 | 11.527400000000 | 15.164100000000 | R=2.00  |
| 13 H | 12.251400000000 | 12.398800000000 | 14.716100000000 | R=1.30  |
| 14 H | 13.120200000000 | 11.300500000000 | 15.491900000000 | R=1.30  |
| 15 H | 11.600900000000 | 11.566700000000 | 15.919100000000 | R=1.30  |
| 16 C | 13.120500000000 | 7.155800000000  | 12.927100000000 | R=2.00  |
| 17 H | 12.862400000000 | 6.503100000000  | 13.611300000000 | R=1.30  |

|      |                 |                 |                 |        |
|------|-----------------|-----------------|-----------------|--------|
| 18 H | 14.051200000000 | 7.426200000000  | 13.067900000000 | R=1.30 |
| 19 H | 13.029200000000 | 6.750600000000  | 12.040000000000 | R=1.30 |
| 20 C | 10.509300000000 | 11.122300000000 | 9.681400000000  | R=2.00 |
| 21 C | 9.657700000000  | 10.343900000000 | 8.898700000000  | R=2.00 |
| 22 H | 9.510000000000  | 10.606200000000 | 7.997200000000  | R=1.30 |
| 23 C | 9.013300000000  | 9.204000000000  | 9.367800000000  | R=2.00 |
| 24 C | 11.309300000000 | 12.232700000000 | 9.055000000000  | R=2.00 |
| 25 H | 11.273400000000 | 13.024900000000 | 9.630700000000  | R=1.30 |
| 26 H | 10.933800000000 | 12.449700000000 | 8.175600000000  | R=1.30 |
| 27 H | 12.240800000000 | 11.945300000000 | 8.951400000000  | R=1.30 |
| 28 C | 8.293800000000  | 8.303100000000  | 8.404300000000  | R=2.00 |
| 29 H | 8.762500000000  | 7.444900000000  | 8.347500000000  | R=1.30 |
| 30 H | 8.271200000000  | 8.722500000000  | 7.519300000000  | R=1.30 |
| 31 H | 7.378100000000  | 8.154000000000  | 8.717400000000  | R=1.30 |
| 32 C | 7.110300000000  | 10.957500000000 | 12.834800000000 | R=2.00 |
| 33 C | 6.740700000000  | 9.876900000000  | 13.653400000000 | R=2.00 |
| 34 H | 5.884600000000  | 9.907800000000  | 14.063000000000 | R=1.30 |
| 35 C | 7.532500000000  | 8.774700000000  | 13.903600000000 | R=2.00 |
| 36 C | 6.197000000000  | 12.134300000000 | 12.692600000000 | R=2.00 |
| 37 H | 6.398600000000  | 12.790800000000 | 13.392000000000 | R=1.30 |
| 38 H | 5.267500000000  | 11.838300000000 | 12.779800000000 | R=1.30 |
| 39 H | 6.327400000000  | 12.544600000000 | 11.812500000000 | R=1.30 |
| 40 C | 7.054400000000  | 7.674700000000  | 14.814500000000 | R=2.00 |
| 41 H | 7.203800000000  | 6.806800000000  | 14.385500000000 | R=1.30 |
| 42 H | 6.096900000000  | 7.790100000000  | 14.992700000000 | R=1.30 |
| 43 H | 7.549500000000  | 7.711100000000  | 15.658900000000 | R=1.30 |
| END  |                 |                 |                 |        |

#### GUIBONDS

1 1 2 1  
2 1 3 1  
3 1 4 1  
4 1 5 1  
5 1 6 1  
6 1 7 1  
7 2 8 1.0  
8 3 11 1.0  
9 4 20 1.0  
10 5 23 1.0  
11 6 32 1.0  
12 7 35 1.0  
13 8 9 1.0  
14 8 12 1  
15 9 10 1  
16 9 11 1.0  
17 11 16 1

18 12 13 1  
19 12 14 1  
20 12 15 1  
21 16 17 1  
22 16 18 1  
23 16 19 1  
24 20 21 1.0  
25 20 24 1  
26 21 22 1  
27 21 23 1.0  
28 23 28 1  
29 24 25 1  
30 24 26 1  
31 24 27 1  
32 28 29 1  
33 28 30 1  
34 28 31 1  
35 32 33 1.0  
36 32 36 1  
37 33 34 1  
38 33 35 1.0  
39 35 40 1  
40 36 37 1  
41 36 38 1  
42 36 39 1  
43 40 41 1  
44 40 42 1  
45 40 43 1  
END

SOLVATION

Surf Delley

Div ndiv=4

Solvent name=CRS cav0=0.0 cav1=0.0

Charged method=CONJ conv=1.00E-06 iter=300 corr

C-Mat EXACT

SCF VAR ALL

CSMRSP

END

CHARGE 0.0 2.0

UNRESTRICTED

BASIS

type TZP

```
core Small
createoutput None
END
```

```
XC
GGA Becke Perdew
END
```

```
RELATIVISTIC Scalar ZORA
```

```
GEOMETRY
  branch New
  iterations 100
END
```

```
SCF
iterations 50
mixing 0.2
diis
END
```

```
BeckeGrid
  Quality Good
End
```

```
ZlmFit
  Quality Normal
End
```

```
ALLPOINTS
NOPRINT LOGFILE
```

```
eor
```

```
# =====
# COSKF
# =====
```

```
rm -f COSKF
"$ADFBIN/cpkf" TAPE21 COSKF COSMO
```

```
mv TAPE21 GASPHASE.t21
```

# COSMO-RS Solvent calculation

# =====

# The Molecule

# =====

"\$ADFBIN/adf" <<eor

TITLE metalcomplex-I

ATOMS

|      |                 |                 |                 |         |
|------|-----------------|-----------------|-----------------|---------|
| 1 V  | 9.728500000000  | 9.731800000000  | 12.193700000000 | R=1.908 |
| 2 O  | 10.632300000000 | 10.717600000000 | 13.636500000000 | R=1.72  |
| 3 O  | 11.225000000000 | 8.388600000000  | 12.254300000000 | R=1.72  |
| 4 O  | 10.708700000000 | 10.925800000000 | 10.919000000000 | R=1.72  |
| 5 O  | 9.016700000000  | 8.813400000000  | 10.582800000000 | R=1.72  |
| 6 O  | 8.216900000000  | 11.024800000000 | 12.208900000000 | R=1.72  |
| 7 O  | 8.713000000000  | 8.589800000000  | 13.425700000000 | R=1.72  |
| 8 C  | 11.766000000000 | 10.477300000000 | 14.190100000000 | R=2.00  |
| 9 C  | 12.541600000000 | 9.365700000000  | 13.949300000000 | R=2.00  |
| 10 H | 13.346100000000 | 9.273700000000  | 14.446000000000 | R=1.30  |
| 11 C | 12.231200000000 | 8.357000000000  | 13.022700000000 | R=2.00  |
| 12 C | 12.224400000000 | 11.527400000000 | 15.164100000000 | R=2.00  |
| 13 H | 12.251400000000 | 12.398800000000 | 14.716100000000 | R=1.30  |
| 14 H | 13.120200000000 | 11.300500000000 | 15.491900000000 | R=1.30  |
| 15 H | 11.600900000000 | 11.566700000000 | 15.919100000000 | R=1.30  |
| 16 C | 13.120500000000 | 7.155800000000  | 12.927100000000 | R=2.00  |
| 17 H | 12.862400000000 | 6.503100000000  | 13.611300000000 | R=1.30  |
| 18 H | 14.051200000000 | 7.426200000000  | 13.067900000000 | R=1.30  |
| 19 H | 13.029200000000 | 6.750600000000  | 12.040000000000 | R=1.30  |
| 20 C | 10.509300000000 | 11.122300000000 | 9.681400000000  | R=2.00  |
| 21 C | 9.657700000000  | 10.343900000000 | 8.898700000000  | R=2.00  |
| 22 H | 9.510000000000  | 10.606200000000 | 7.997200000000  | R=1.30  |
| 23 C | 9.013300000000  | 9.204000000000  | 9.367800000000  | R=2.00  |
| 24 C | 11.309300000000 | 12.232700000000 | 9.055000000000  | R=2.00  |
| 25 H | 11.273400000000 | 13.024900000000 | 9.630700000000  | R=1.30  |
| 26 H | 10.933800000000 | 12.449700000000 | 8.175600000000  | R=1.30  |
| 27 H | 12.240800000000 | 11.945300000000 | 8.951400000000  | R=1.30  |
| 28 C | 8.293800000000  | 8.303100000000  | 8.404300000000  | R=2.00  |
| 29 H | 8.762500000000  | 7.444900000000  | 8.347500000000  | R=1.30  |
| 30 H | 8.271200000000  | 8.722500000000  | 7.519300000000  | R=1.30  |
| 31 H | 7.378100000000  | 8.154000000000  | 8.717400000000  | R=1.30  |
| 32 C | 7.110300000000  | 10.957500000000 | 12.834800000000 | R=2.00  |
| 33 C | 6.740700000000  | 9.876900000000  | 13.653400000000 | R=2.00  |
| 34 H | 5.884600000000  | 9.907800000000  | 14.063000000000 | R=1.30  |
| 35 C | 7.532500000000  | 8.774700000000  | 13.903600000000 | R=2.00  |
| 36 C | 6.197000000000  | 12.134300000000 | 12.692600000000 | R=2.00  |

|      |                |                 |                 |        |
|------|----------------|-----------------|-----------------|--------|
| 37 H | 6.398600000000 | 12.790800000000 | 13.392000000000 | R=1.30 |
| 38 H | 5.267500000000 | 11.838300000000 | 12.779800000000 | R=1.30 |
| 39 H | 6.327400000000 | 12.544600000000 | 11.812500000000 | R=1.30 |
| 40 C | 7.054400000000 | 7.674700000000  | 14.814500000000 | R=2.00 |
| 41 H | 7.203800000000 | 6.806800000000  | 14.385500000000 | R=1.30 |
| 42 H | 6.096900000000 | 7.790100000000  | 14.992700000000 | R=1.30 |
| 43 H | 7.549500000000 | 7.711100000000  | 15.658900000000 | R=1.30 |

END

#### GUIBONDS

1 1 2 1  
2 1 3 1  
3 1 4 1  
4 1 5 1  
5 1 6 1  
6 1 7 1  
7 2 8 1.0  
8 3 11 1.0  
9 4 20 1.0  
10 5 23 1.0  
11 6 32 1.0  
12 7 35 1.0  
13 8 9 1.0  
14 8 12 1  
15 9 10 1  
16 9 11 1.0  
17 11 16 1  
18 12 13 1  
19 12 14 1  
20 12 15 1  
21 16 17 1  
22 16 18 1  
23 16 19 1  
24 20 21 1.0  
25 20 24 1  
26 21 22 1  
27 21 23 1.0  
28 23 28 1  
29 24 25 1  
30 24 26 1  
31 24 27 1  
32 28 29 1  
33 28 30 1  
34 28 31 1  
35 32 33 1.0  
36 32 36 1

37 33 34 1  
38 33 35 1.0  
39 35 40 1  
40 36 37 1  
41 36 38 1  
42 36 39 1  
43 40 41 1  
44 40 42 1  
45 40 43 1  
END

SOLVATION

Surf Delley  
Div ndiv=4  
Solvent name=CRS cav0=0.0 cav1=0.0  
Charged method=CONJ conv=1.00E-06 iter=300 corr  
C-Mat EXACT  
SCF VAR ALL  
CSMRSP

END

CHARGE 0.0 2.0

UNRESTRICTED

BASIS

type TZP  
core Small  
createoutput None  
END

XC

GGA Becke Perdew  
END

RELATIVISTIC Scalar ZORA

RESTART GASPHASE.t21

SCF

iterations 50  
mixing 0.2  
diis  
END

BeckeGrid

Quality Good  
End

ZlmFit  
Quality Normal  
End

ALLPOINTS  
NOPRINT LOGFILE

eor

# =====  
# COSKF  
# =====

rm -f COSKF  
"\$ADFBIN/cpkf" TAPE21 COSKF COSMO

#!/bin/sh

# =====  
# The Molecule  
# =====

"\$ADFBIN/adf" <<eor

TITLE metalcomplex-III

ATOMS

|      |                 |                 |                 |         |
|------|-----------------|-----------------|-----------------|---------|
| 1 Mn | 0.029888372090  | 0.077986046510  | -0.020172093020 | R=1.867 |
| 2 O  | -0.780711627900 | 1.045686047000  | 1.572027907000  | R=1.72  |
| 3 O  | 1.001488372000  | -1.096113953000 | 1.269527907000  | R=1.72  |
| 4 O  | 1.486388372000  | 1.384986047000  | -0.062372093020 | R=1.72  |
| 5 O  | 0.918088372100  | -0.934013953500 | -1.525072093000 | R=1.72  |
| 6 O  | -0.948511627900 | 1.219386047000  | -1.307372093000 | R=1.72  |
| 7 O  | -1.457111628000 | -1.191013953000 | -0.017472093020 | R=1.72  |
| 8 C  | -0.712211627900 | 0.698886046500  | 2.782127907000  | R=2.00  |
| 9 C  | -0.003011627907 | -0.392613953500 | 3.255727907000  | R=2.00  |
| 10 H | -0.081811627910 | -0.586413953500 | 4.161127907000  | R=1.30  |
| 11 C | 0.801988372100  | -1.209513953000 | 2.512627907000  | R=2.00  |
| 12 C | -1.450811628000 | 1.593786047000  | 3.747727907000  | R=2.00  |



|      |                 |                 |                 |        |
|------|-----------------|-----------------|-----------------|--------|
| 13 H | -0.823511627900 | 2.150986047000  | 4.213027907000  | R=1.30 |
| 14 H | -1.929811628000 | 1.054186047000  | 4.380327907000  | R=1.30 |
| 15 H | -2.070411628000 | 2.144286047000  | 3.262427907000  | R=1.30 |
| 16 C | 1.577688372000  | -2.329313953000 | 3.165327907000  | R=2.00 |
| 17 H | 1.467988372000  | -3.135413953000 | 2.654927907000  | R=1.30 |
| 18 H | 1.251688372000  | -2.467913953000 | 4.057327907000  | R=1.30 |
| 19 H | 2.509488372000  | -2.096413953000 | 3.197127907000  | R=1.30 |
| 20 C | 2.498588372000  | 1.399586047000  | -0.817872093000 | R=2.00 |
| 21 C | 2.802988372000  | 0.420286046500  | -1.731472093000 | R=2.00 |
| 22 H | 3.600288372000  | 0.515786046500  | -2.200172093000 | R=1.30 |
| 23 C | 2.036588372000  | -0.690013953500 | -2.019472093000 | R=2.00 |
| 24 C | 3.393288372000  | 2.607186047000  | -0.677272093000 | R=2.00 |
| 25 H | 3.079588372000  | 3.307086047000  | -1.256272093000 | R=1.30 |
| 26 H | 4.290988372000  | 2.370386047000  | -0.919872093000 | R=1.30 |
| 27 H | 3.377788372000  | 2.914086047000  | 0.231527907000  | R=1.30 |
| 28 C | 2.529488372000  | -1.708813953000 | -3.013572093000 | R=2.00 |
| 29 H | 2.339488372000  | -2.591713953000 | -2.687272093000 | R=1.30 |
| 30 H | 3.476688372000  | -1.609213953000 | -3.130772093000 | R=1.30 |
| 31 H | 2.086088372000  | -1.576913953000 | -3.853772093000 | R=1.30 |
| 32 C | -2.096711628000 | 1.005686047000  | -1.785972093000 | R=2.00 |
| 33 C | -2.877511628000 | -0.091213953490 | -1.506172093000 | R=2.00 |
| 34 H | -3.706811628000 | -0.135613953500 | -1.925772093000 | R=1.30 |
| 35 C | -2.549411628000 | -1.135513953000 | -0.659672093000 | R=2.00 |
| 36 C | -2.574211628000 | 2.082386047000  | -2.738472093000 | R=2.00 |
| 37 H | -2.424311628000 | 2.944986047000  | -2.347472093000 | R=1.30 |
| 38 H | -3.512111628000 | 1.966586047000  | -2.908172093000 | R=1.30 |
| 39 H | -2.090511628000 | 2.016386047000  | -3.564172093000 | R=1.30 |
| 40 C | -3.468811628000 | -2.298313953000 | -0.476372093000 | R=2.00 |
| 41 H | -3.237011628000 | -2.991413953000 | -1.098972093000 | R=1.30 |
| 42 H | -4.374311628000 | -2.019713953000 | -0.632072093000 | R=1.30 |
| 43 H | -3.386911628000 | -2.633413953000 | 0.420627907000  | R=1.30 |

END

#### GUIBONDS

1 1 2 1.0  
2 1 3 1.0  
3 1 4 1.0  
4 1 5 1.0  
5 1 6 1.0  
6 1 7 1.0  
7 2 8 1.0  
8 3 11 1.0  
9 4 20 1.0  
10 5 23 1.0  
11 6 32 1.0  
12 7 35 1.0

13 8 9 1.0  
14 8 12 1.0  
15 9 10 1.0  
16 9 11 1.0  
17 11 16 1.0  
18 12 13 1.0  
19 12 14 1.0  
20 12 15 1.0  
21 16 17 1.0  
22 16 18 1.0  
23 16 19 1.0  
24 20 21 1.0  
25 20 24 1.0  
26 21 22 1.0  
27 21 23 1.0  
28 23 28 1.0  
29 24 25 1.0  
30 24 26 1.0  
31 24 27 1.0  
32 28 29 1.0  
33 28 30 1.0  
34 28 31 1.0  
35 32 33 1.0  
36 32 36 1.0  
37 33 34 1.0  
38 33 35 1.0  
39 35 40 1.0  
40 36 37 1.0  
41 36 38 1.0  
42 36 39 1.0  
43 40 41 1.0  
44 40 42 1.0  
45 40 43 1.0  
END

SOLVATION

Surf Delley

Div ndiv=4

Solvent name=CRS cav0=0.0 cav1=0.0

Charged method=CONJ conv=1.00E-06 iter=300 corr

C-Mat EXACT

SCF VAR ALL

CSMRSP

END

CHARGE 0.0 2.0

UNRESTRICTED

BASIS

type TZP

core Small

createoutput None

END

XC

GGA Becke Perdew

END

RELATIVISTIC Scalar ZORA

GEOMETRY

branch New

iterations 100

END

SCF

iterations 50

mixing 0.2

diis

END

BeckeGrid

Quality Good

End

ZlmFit

Quality Normal

End

ALLPOINTS

NOPRINT LOGFILE

eor

# =====

# COSKF

# =====

rm -f COSKF

"\\${ADFBIN}/cpkf" TAPE21 COSKF COSMO

mv TAPE21 GASPHASE.t21

# COSMO-RS Solvent calculation

# =====

# The Molecule

# =====

"\\$ADFBIN/adf" <<eor

TITLE metalcomplex-III

ATOMS

|      |                 |                 |                 |         |
|------|-----------------|-----------------|-----------------|---------|
| 1 Mn | 0.029888372090  | 0.077986046510  | -0.020172093020 | R=1.867 |
| 2 O  | -0.780711627900 | 1.045686047000  | 1.572027907000  | R=1.72  |
| 3 O  | 1.001488372000  | -1.096113953000 | 1.269527907000  | R=1.72  |
| 4 O  | 1.486388372000  | 1.384986047000  | -0.062372093020 | R=1.72  |
| 5 O  | 0.918088372100  | -0.934013953500 | -1.525072093000 | R=1.72  |
| 6 O  | -0.948511627900 | 1.219386047000  | -1.307372093000 | R=1.72  |
| 7 O  | -1.457111628000 | -1.191013953000 | -0.017472093020 | R=1.72  |
| 8 C  | -0.712211627900 | 0.698886046500  | 2.782127907000  | R=2.00  |
| 9 C  | -0.003011627907 | -0.392613953500 | 3.255727907000  | R=2.00  |
| 10 H | -0.081811627910 | -0.586413953500 | 4.161127907000  | R=1.30  |
| 11 C | 0.801988372100  | -1.209513953000 | 2.512627907000  | R=2.00  |
| 12 C | -1.450811628000 | 1.593786047000  | 3.747727907000  | R=2.00  |
| 13 H | -0.823511627900 | 2.150986047000  | 4.213027907000  | R=1.30  |
| 14 H | -1.929811628000 | 1.054186047000  | 4.380327907000  | R=1.30  |
| 15 H | -2.070411628000 | 2.144286047000  | 3.262427907000  | R=1.30  |
| 16 C | 1.577688372000  | -2.329313953000 | 3.165327907000  | R=2.00  |
| 17 H | 1.467988372000  | -3.135413953000 | 2.654927907000  | R=1.30  |
| 18 H | 1.251688372000  | -2.467913953000 | 4.057327907000  | R=1.30  |
| 19 H | 2.509488372000  | -2.096413953000 | 3.197127907000  | R=1.30  |
| 20 C | 2.498588372000  | 1.399586047000  | -0.817872093000 | R=2.00  |
| 21 C | 2.802988372000  | 0.420286046500  | -1.731472093000 | R=2.00  |
| 22 H | 3.600288372000  | 0.515786046500  | -2.200172093000 | R=1.30  |
| 23 C | 2.036588372000  | -0.690013953500 | -2.019472093000 | R=2.00  |
| 24 C | 3.393288372000  | 2.607186047000  | -0.677272093000 | R=2.00  |
| 25 H | 3.079588372000  | 3.307086047000  | -1.256272093000 | R=1.30  |
| 26 H | 4.290988372000  | 2.370386047000  | -0.919872093000 | R=1.30  |
| 27 H | 3.377788372000  | 2.914086047000  | 0.231527907000  | R=1.30  |
| 28 C | 2.529488372000  | -1.708813953000 | -3.013572093000 | R=2.00  |
| 29 H | 2.339488372000  | -2.591713953000 | -2.687272093000 | R=1.30  |
| 30 H | 3.476688372000  | -1.609213953000 | -3.130772093000 | R=1.30  |
| 31 H | 2.086088372000  | -1.576913953000 | -3.853772093000 | R=1.30  |
| 32 C | -2.096711628000 | 1.005686047000  | -1.785972093000 | R=2.00  |
| 33 C | -2.877511628000 | -0.091213953490 | -1.506172093000 | R=2.00  |

|      |                 |                 |                 |        |
|------|-----------------|-----------------|-----------------|--------|
| 34 H | -3.706811628000 | -0.135613953500 | -1.925772093000 | R=1.30 |
| 35 C | -2.549411628000 | -1.135513953000 | -0.659672093000 | R=2.00 |
| 36 C | -2.574211628000 | 2.082386047000  | -2.738472093000 | R=2.00 |
| 37 H | -2.424311628000 | 2.944986047000  | -2.347472093000 | R=1.30 |
| 38 H | -3.512111628000 | 1.966586047000  | -2.908172093000 | R=1.30 |
| 39 H | -2.090511628000 | 2.016386047000  | -3.564172093000 | R=1.30 |
| 40 C | -3.468811628000 | -2.298313953000 | -0.476372093000 | R=2.00 |
| 41 H | -3.237011628000 | -2.991413953000 | -1.098972093000 | R=1.30 |
| 42 H | -4.374311628000 | -2.019713953000 | -0.632072093000 | R=1.30 |
| 43 H | -3.386911628000 | -2.633413953000 | 0.420627907000  | R=1.30 |

END

#### GUIBONDS

1 1 2 1.0  
2 1 3 1.0  
3 1 4 1.0  
4 1 5 1.0  
5 1 6 1.0  
6 1 7 1.0  
7 2 8 1.0  
8 3 11 1.0  
9 4 20 1.0  
10 5 23 1.0  
11 6 32 1.0  
12 7 35 1.0  
13 8 9 1.0  
14 8 12 1.0  
15 9 10 1.0  
16 9 11 1.0  
17 11 16 1.0  
18 12 13 1.0  
19 12 14 1.0  
20 12 15 1.0  
21 16 17 1.0  
22 16 18 1.0  
23 16 19 1.0  
24 20 21 1.0  
25 20 24 1.0  
26 21 22 1.0  
27 21 23 1.0  
28 23 28 1.0  
29 24 25 1.0  
30 24 26 1.0  
31 24 27 1.0  
32 28 29 1.0  
33 28 30 1.0

34 28 31 1.0  
35 32 33 1.0  
36 32 36 1.0  
37 33 34 1.0  
38 33 35 1.0  
39 35 40 1.0  
40 36 37 1.0  
41 36 38 1.0  
42 36 39 1.0  
43 40 41 1.0  
44 40 42 1.0  
45 40 43 1.0  
END

SOLVATION

Surf Delley

Div ndiv=4

Solvent name=CRS cav0=0.0 cav1=0.0

Charged method=CONJ conv=1.00E-06 iter=300 corr

C-Mat EXACT

SCF VAR ALL

CSMRSP

END

CHARGE 0.0 2.0

UNRESTRICTED

BASIS

type TZP

core Small

createoutput None

END

XC

GGA Becke Perdew

END

RELATIVISTIC Scalar ZORA

RESTART GASPHASE.t21

SCF

iterations 50

mixing 0.2

diis

END

BeckeGrid  
Quality Good  
End

ZlmFit  
Quality Normal  
End

ALLPOINTS  
NOPRINT LOGFILE

eor

# =====  
# COSKF  
# =====

rm -f COSKF  
"\$ADFBIN/cpkf" TAPE21 COSKF COSMO

#!/bin/sh

# =====  
# The Molecule  
# =====

"\$ADFBIN/adf" <<eor

TITLE metalcomplex-II

ATOMS

|      |                 |                 |                 |         |
|------|-----------------|-----------------|-----------------|---------|
| 1 Cr | -0.042834027000 | 0.581250438000  | -0.336465180000 | R=1.875 |
| 2 O  | -1.447016477000 | -0.172249582000 | 0.806430220000  | R=1.72  |
| 3 O  | -0.330203007000 | 2.351084198000  | 0.427810640000  | R=1.72  |
| 4 O  | 1.307849023000  | 0.160012718000  | 1.021875770000  | R=1.72  |
| 5 O  | 1.315384263000  | 1.394167848000  | -1.473646640000 | R=1.72  |
| 6 O  | 0.232332043000  | -1.171523562000 | -1.173021830000 | R=1.72  |
| 7 O  | -1.343183897000 | 1.064051278000  | -1.705871330000 | R=1.72  |
| 8 C  | -1.223255767000 | 0.032185738000  | 2.142449670000  | R=2.00  |
| 9 C  | -0.599150467000 | 1.255399998000  | 2.650077980000  | R=2.00  |
| 10 H | -0.482925017000 | 1.357288788000  | 3.722351360000  | R=1.30  |
| 11 C | -0.229618007000 | 2.389461628000  | 1.795830270000  | R=2.00  |
| 12 C | -1.871526587000 | -0.896891282000 | 3.115767470000  | R=2.00  |
| 13 H | -2.156270737000 | -1.842890782000 | 2.608711880000  | R=1.30  |

|      |                 |                 |                 |        |
|------|-----------------|-----------------|-----------------|--------|
| 14 H | -2.783127477000 | -0.421947692000 | 3.534742240000  | R=1.30 |
| 15 H | -1.167247617000 | -1.135421732000 | 3.940460060000  | R=1.30 |
| 16 C | 0.130139173000  | 3.697287108000  | 2.426504000000  | R=2.00 |
| 17 H | 1.146686133000  | 3.995808748000  | 2.096076380000  | R=1.30 |
| 18 H | 0.120789233000  | 3.635843098000  | 3.535333210000  | R=1.30 |
| 19 H | -0.596307877000 | 4.473315948000  | 2.107161040000  | R=1.30 |
| 20 C | 2.338556833000  | -0.604352912000 | 0.541504850000  | R=2.00 |
| 21 C | 2.850177703000  | -0.456824412000 | -0.822405160000 | R=2.00 |
| 22 H | 3.684511023000  | -1.080180442000 | -1.120702220000 | R=1.30 |
| 23 C | 2.367826003000  | 0.562137018000  | -1.761068350000 | R=2.00 |
| 24 C | 3.124495463000  | -1.419629372000 | 1.515405570000  | R=2.00 |
| 25 H | 2.542481263000  | -1.563788792000 | 2.450063840000  | R=1.30 |
| 26 H | -4.427960997000 | -0.122727022000 | -2.470649860000 | R=1.30 |
| 27 H | 3.350137193000  | -2.416500692000 | 1.081418220000  | R=1.30 |
| 28 C | 3.132459313000  | 0.822619928000  | -3.019999880000 | R=2.00 |
| 29 H | 2.461041043000  | 0.679824878000  | -3.892062000000 | R=1.30 |
| 30 H | 3.999879573000  | 0.136875508000  | -3.123941200000 | R=1.30 |
| 31 H | -3.505905127000 | 1.153045868000  | -3.352392700000 | R=1.30 |
| 32 C | -0.921364977000 | -1.894592542000 | -1.330611660000 | R=2.00 |
| 33 C | -2.221152927000 | -1.260538232000 | -1.569736350000 | R=2.00 |
| 34 H | -3.093681257000 | -1.896551832000 | -1.654733420000 | R=1.30 |
| 35 C | -2.381957337000 | 0.175624138000  | -1.817782650000 | R=2.00 |
| 36 C | -0.802891687000 | -3.384074462000 | -1.392116010000 | R=2.00 |
| 37 H | -0.104046687000 | -3.665145712000 | -2.207284310000 | R=1.30 |
| 38 H | -1.784727837000 | -3.867071442000 | -1.581820360000 | R=1.30 |
| 39 H | -0.402410227000 | -3.759154452000 | -0.427367460000 | R=1.30 |
| 40 C | -3.678464127000 | 0.689139948000  | -2.358947360000 | R=2.00 |
| 41 H | -4.085769157000 | 1.455911868000  | -1.667696940000 | R=1.30 |
| 42 H | 3.503754963000  | 1.868561198000  | -3.016856050000 | R=1.30 |
| 43 H | 4.074499083000  | -0.898840952000 | 1.757204270000  | R=1.30 |

END

#### GUIBONDS

1 1 2 1  
2 1 3 1  
3 1 4 1  
4 1 5 1  
5 1 6 1  
6 1 7 1  
7 2 8 1.0  
8 3 11 1.0  
9 4 20 1.0  
10 5 23 1.0  
11 6 32 1.0  
12 7 35 1.0  
13 8 9 1.0



14 8 12 1  
15 9 10 1  
16 9 11 1.0  
17 11 16 1  
18 12 13 1  
19 12 14 1  
20 12 15 1  
21 16 17 1  
22 16 18 1  
23 16 19 1  
24 20 21 1.0  
25 20 24 1  
26 21 22 1  
27 21 23 1.0  
28 23 28 1  
29 24 25 1  
30 40 26 1  
31 24 27 1  
32 28 29 1  
33 28 30 1  
34 40 31 1  
35 32 33 1.0  
36 32 36 1  
37 34 33 1.0  
38 33 35 1.0  
39 35 40 1  
40 36 37 1  
41 36 38 1  
42 36 39 1  
43 40 41 1  
44 42 28 1.0  
45 43 24 1.0  
END

SOLVATION

Surf Delley

Div ndiv=4

Solvent name=CRS cav0=0.0 cav1=0.0

Charged method=CONJ conv=1.00E-06 iter=300 corr

C-Mat EXACT

SCF VAR ALL

CSMRSP

END

CHARGE 0.0 3.0

UNRESTRICTED

BASIS

type TZP

core Small

createoutput None

END

XC

GGA Becke Perdew

END

RELATIVISTIC Scalar ZORA

GEOMETRY

branch New

iterations 100

END

SCF

iterations 50

mixing 0.2

diis

END

BeckeGrid

Quality Good

End

ZlmFit

Quality Normal

End

ALLPOINTS

NOPRINT LOGFILE

eor

# =====

# COSKF

# =====

rm -f COSKF

"\\$ADFBIN/cpkf" TAPE21 COSKF COSMO

mv TAPE21 GASPHASE.t21

# COSMO-RS Solvent calculation

# =====

# The Molecule

# =====

"\\$ADFBIN/adf" <<eor

TITLE metalcomplex-II

ATOMS

|      |                 |                 |                 |         |
|------|-----------------|-----------------|-----------------|---------|
| 1 Cr | -0.042834027000 | 0.581250438000  | -0.336465180000 | R=1.875 |
| 2 O  | -1.447016477000 | -0.172249582000 | 0.806430220000  | R=1.72  |
| 3 O  | -0.330203007000 | 2.351084198000  | 0.427810640000  | R=1.72  |
| 4 O  | 1.307849023000  | 0.160012718000  | 1.021875770000  | R=1.72  |
| 5 O  | 1.315384263000  | 1.394167848000  | -1.473646640000 | R=1.72  |
| 6 O  | 0.232332043000  | -1.171523562000 | -1.173021830000 | R=1.72  |
| 7 O  | -1.343183897000 | 1.064051278000  | -1.705871330000 | R=1.72  |
| 8 C  | -1.223255767000 | 0.032185738000  | 2.142449670000  | R=2.00  |
| 9 C  | -0.599150467000 | 1.255399998000  | 2.650077980000  | R=2.00  |
| 10 H | -0.482925017000 | 1.357288788000  | 3.722351360000  | R=1.30  |
| 11 C | -0.229618007000 | 2.389461628000  | 1.795830270000  | R=2.00  |
| 12 C | -1.871526587000 | -0.896891282000 | 3.115767470000  | R=2.00  |
| 13 H | -2.156270737000 | -1.842890782000 | 2.608711880000  | R=1.30  |
| 14 H | -2.783127477000 | -0.421947692000 | 3.534742240000  | R=1.30  |
| 15 H | -1.167247617000 | -1.135421732000 | 3.940460060000  | R=1.30  |
| 16 C | 0.130139173000  | 3.697287108000  | 2.426504000000  | R=2.00  |
| 17 H | 1.146686133000  | 3.995808748000  | 2.096076380000  | R=1.30  |
| 18 H | 0.120789233000  | 3.635843098000  | 3.535333210000  | R=1.30  |
| 19 H | -0.596307877000 | 4.473315948000  | 2.107161040000  | R=1.30  |
| 20 C | 2.338556833000  | -0.604352912000 | 0.541504850000  | R=2.00  |
| 21 C | 2.850177703000  | -0.456824412000 | -0.822405160000 | R=2.00  |
| 22 H | 3.684511023000  | -1.080180442000 | -1.120702220000 | R=1.30  |
| 23 C | 2.367826003000  | 0.562137018000  | -1.761068350000 | R=2.00  |
| 24 C | 3.124495463000  | -1.419629372000 | 1.515405570000  | R=2.00  |
| 25 H | 2.542481263000  | -1.563788792000 | 2.450063840000  | R=1.30  |
| 26 H | -4.427960997000 | -0.122727022000 | -2.470649860000 | R=1.30  |
| 27 H | 3.350137193000  | -2.416500692000 | 1.081418220000  | R=1.30  |
| 28 C | 3.132459313000  | 0.822619928000  | -3.019999880000 | R=2.00  |
| 29 H | 2.461041043000  | 0.679824878000  | -3.892062000000 | R=1.30  |
| 30 H | 3.999879573000  | 0.136875508000  | -3.123941200000 | R=1.30  |
| 31 H | -3.505905127000 | 1.153045868000  | -3.352392700000 | R=1.30  |
| 32 C | -0.921364977000 | -1.894592542000 | -1.330611660000 | R=2.00  |

|      |                 |                 |                 |        |
|------|-----------------|-----------------|-----------------|--------|
| 33 C | -2.221152927000 | -1.260538232000 | -1.569736350000 | R=2.00 |
| 34 H | -3.093681257000 | -1.896551832000 | -1.654733420000 | R=1.30 |
| 35 C | -2.381957337000 | 0.175624138000  | -1.817782650000 | R=2.00 |
| 36 C | -0.802891687000 | -3.384074462000 | -1.392116010000 | R=2.00 |
| 37 H | -0.104046687000 | -3.665145712000 | -2.207284310000 | R=1.30 |
| 38 H | -1.784727837000 | -3.867071442000 | -1.581820360000 | R=1.30 |
| 39 H | -0.402410227000 | -3.759154452000 | -0.427367460000 | R=1.30 |
| 40 C | -3.678464127000 | 0.689139948000  | -2.358947360000 | R=2.00 |
| 41 H | -4.085769157000 | 1.455911868000  | -1.667696940000 | R=1.30 |
| 42 H | 3.503754963000  | 1.868561198000  | -3.016856050000 | R=1.30 |
| 43 H | 4.074499083000  | -0.898840952000 | 1.757204270000  | R=1.30 |

END

#### GUIBONDS

1 1 2 1  
 2 1 3 1  
 3 1 4 1  
 4 1 5 1  
 5 1 6 1  
 6 1 7 1  
 7 2 8 1.0  
 8 3 11 1.0  
 9 4 20 1.0  
 10 5 23 1.0  
 11 6 32 1.0  
 12 7 35 1.0  
 13 8 9 1.0  
 14 8 12 1  
 15 9 10 1  
 16 9 11 1.0  
 17 11 16 1  
 18 12 13 1  
 19 12 14 1  
 20 12 15 1  
 21 16 17 1  
 22 16 18 1  
 23 16 19 1  
 24 20 21 1.0  
 25 20 24 1  
 26 21 22 1  
 27 21 23 1.0  
 28 23 28 1  
 29 24 25 1  
 30 40 26 1  
 31 24 27 1  
 32 28 29 1

33 28 30 1  
34 40 31 1  
35 32 33 1.0  
36 32 36 1  
37 34 33 1.0  
38 33 35 1.0  
39 35 40 1  
40 36 37 1  
41 36 38 1  
42 36 39 1  
43 40 41 1  
44 42 28 1.0  
45 43 24 1.0  
END

SOLVATION

Surf Delley  
Div ndiv=4  
Solvent name=CRS cav0=0.0 cav1=0.0  
Charged method=CONJ conv=1.00E-06 iter=300 corr  
C-Mat EXACT  
SCF VAR ALL  
CSMRSP

END

CHARGE 0.0 3.0

UNRESTRICTED

BASIS

type TZP  
core Small  
createoutput None  
END

XC

GGA Becke Perdew  
END

RELATIVISTIC Scalar ZORA

RESTART GASPHASE.t21

SCF

iterations 50  
mixing 0.2

diis  
END

BeckeGrid  
Quality Good  
End

ZlmFit  
Quality Normal  
End

ALLPOINTS  
NOPRINT LOGFILE

eor

# =====  
# COSKF  
# =====

rm -f COSKF  
"\\$ADFBIN/cpkf" TAPE21 COSKF COSMO

#!/bin/sh

# =====  
# The Molecule  
# =====

"\\$ADFBIN/adf" <<eor

TITLE metalcomplex-V

ATOMS

|      |                 |                 |                 |         |
|------|-----------------|-----------------|-----------------|---------|
| 1 Fe | 9.769071444000  | 9.800836796000  | 12.145676840000 | R=1.858 |
| 2 O  | 10.688659690000 | 10.796634420000 | 13.595366370000 | R=1.72  |
| 3 O  | 11.336517770000 | 8.524978993000  | 12.156565020000 | R=1.72  |
| 4 O  | 10.720912190000 | 10.967024810000 | 10.802140970000 | R=1.72  |
| 5 O  | 9.025227978000  | 8.795085679000  | 10.613006150000 | R=1.72  |
| 6 O  | 8.272874534000  | 11.086480950000 | 12.212748590000 | R=1.72  |
| 7 O  | 8.805908446000  | 8.610797375000  | 13.395914220000 | R=1.72  |
| 8 C  | 11.657128390000 | 10.402192180000 | 14.370578730000 | R=2.00  |
| 9 C  | 12.403771350000 | 9.238275033000  | 14.163872400000 | R=2.00  |
| 10 H | 13.210524190000 | 9.023057112000  | 14.862300990000 | R=1.30  |
| 11 C | 12.239002630000 | 8.370808062000  | 13.062270010000 | R=2.00  |

|      |                 |                 |                 |        |
|------|-----------------|-----------------|-----------------|--------|
| 12 C | 11.964520200000 | 11.311835950000 | 15.529330990000 | R=2.00 |
| 13 H | 12.235355850000 | 12.309028740000 | 15.151433290000 | R=1.30 |
| 14 H | 12.781033770000 | 10.925585050000 | 16.148819160000 | R=1.30 |
| 15 H | 11.063127550000 | 11.434744260000 | 16.147991180000 | R=1.30 |
| 16 C | 13.166315580000 | 7.197547803000  | 12.880974740000 | R=2.00 |
| 17 H | 12.586493650000 | 6.263965758000  | 12.937706440000 | R=1.30 |
| 18 H | 13.956752060000 | 7.175475989000  | 13.638963790000 | R=1.30 |
| 19 H | 13.618709530000 | 7.237288670000  | 11.879468310000 | R=1.30 |
| 20 C | 10.492647480000 | 11.088623740000 | 9.540091836000  | R=2.00 |
| 21 C | 9.612465733000  | 10.253550530000 | 8.817964960000  | R=2.00 |
| 22 H | 9.500913123000  | 10.436471060000 | 7.750690047000  | R=1.30 |
| 23 C | 8.949205752000  | 9.149581834000  | 9.361944843000  | R=2.00 |
| 24 C | 11.259403420000 | 12.172754890000 | 8.828253483000  | R=2.00 |
| 25 H | 11.041313150000 | 13.144883600000 | 9.294210079000  | R=1.30 |
| 26 H | 11.014149000000 | 12.217883560000 | 7.761661287000  | R=1.30 |
| 27 H | 12.338502930000 | 11.992477250000 | 8.944144759000  | R=1.30 |
| 28 C | 8.106733144000  | 8.256309428000  | 8.492023433000  | R=2.00 |
| 29 H | 8.515154469000  | 7.234783460000  | 8.511980855000  | R=1.30 |
| 30 H | 8.068478118000  | 8.610185722000  | 7.456145627000  | R=1.30 |
| 31 H | 7.085990799000  | 8.203943402000  | 8.898788842000  | R=1.30 |
| 32 C | 7.155495349000  | 10.987950670000 | 12.869550160000 | R=2.00 |
| 33 C | 6.811752205000  | 9.895704661000  | 13.682108700000 | R=2.00 |
| 34 H | 5.842723158000  | 9.923880773000  | 14.177877030000 | R=1.30 |
| 35 C | 7.624342459000  | 8.772460924000  | 13.910281570000 | R=2.00 |
| 36 C | 6.209236716000  | 12.148373780000 | 12.713630950000 | R=2.00 |
| 37 H | 6.702692391000  | 13.072291200000 | 13.050334190000 | R=1.30 |
| 38 H | 5.285056553000  | 12.004337510000 | 13.283690580000 | R=1.30 |
| 39 H | 5.963096912000  | 12.282772720000 | 11.649863380000 | R=1.30 |
| 40 C | 7.146871852000  | 7.656161473000  | 14.800247010000 | R=2.00 |
| 41 H | 7.131254747000  | 6.714899762000  | 14.230796610000 | R=1.30 |
| 42 H | 6.147419211000  | 7.850800779000  | 15.203876190000 | R=1.30 |
| 43 H | 7.853974653000  | 7.519248648000  | 15.631903820000 | R=1.30 |

END

#### GUIBONDS

1 1 2 1.0  
2 1 3 1.0  
3 1 4 1.0  
4 1 5 1.0  
5 1 6 1.0  
6 1 7 1.0  
7 2 8 1.0  
8 3 11 1.0  
9 4 20 1.0  
10 5 23 1.0  
11 6 32 1.0

12 7 35 1.0  
13 8 9 1.0  
14 8 12 1.0  
15 9 10 1.0  
16 9 11 1.0  
17 11 16 1.0  
18 12 13 1.0  
19 12 14 1.0  
20 12 15 1.0  
21 16 17 1.0  
22 16 18 1.0  
23 16 19 1.0  
24 20 21 1.0  
25 20 24 1.0  
26 21 22 1.0  
27 21 23 1.0  
28 23 28 1.0  
29 24 25 1.0  
30 24 26 1.0  
31 24 27 1.0  
32 28 29 1.0  
33 28 30 1.0  
34 28 31 1.0  
35 32 33 1.0  
36 32 36 1.0  
37 33 34 1.0  
38 33 35 1.0  
39 35 40 1.0  
40 36 37 1.0  
41 36 38 1.0  
42 36 39 1.0  
43 40 41 1.0  
44 40 42 1.0  
45 40 43 1.0  
END

SOLVATION

Surf Delley

Div ndiv=4

Solvent name=CRS cav0=0.0 cav1=0.0

Charged method=CONJ conv=1.0E-06 iter=300 corr

C-Mat EXACT

SCF VAR ALL

CSMRSP

END



CHARGE 0.0 3.0

UNRESTRICTED

BASIS

type TZP

core Small

createoutput None

END

XC

GGA Becke Perdew

END

RELATIVISTIC Scalar ZORA

GEOMETRY

branch New

iterations 100

END

SCF

iterations 50

mixing 0.2

diis

END

BeckeGrid

Quality Good

End

ZlmFit

Quality Normal

End

ALLPOINTS

NOPRINT LOGFILE

eor

# =====

# COSKF

# =====

```
rm -f COSKF
"$ADFBIN/cpkf" TAPE21 COSKF COSMO
```

```
mv TAPE21 GASPHASE.t21
```

```
# COSMO-RS Solvent calculation
```

```
# =====
# The Molecule
# =====
```

```
"$ADFBIN/adf" <<eor
TITLE metalcomplex-V
```

```
ATOMS
```

|      |                 |                 |                 |         |
|------|-----------------|-----------------|-----------------|---------|
| 1 Fe | 9.769071444000  | 9.800836796000  | 12.145676840000 | R=1.858 |
| 2 O  | 10.688659690000 | 10.796634420000 | 13.595366370000 | R=1.72  |
| 3 O  | 11.336517770000 | 8.524978993000  | 12.156565020000 | R=1.72  |
| 4 O  | 10.720912190000 | 10.967024810000 | 10.802140970000 | R=1.72  |
| 5 O  | 9.025227978000  | 8.795085679000  | 10.613006150000 | R=1.72  |
| 6 O  | 8.272874534000  | 11.086480950000 | 12.212748590000 | R=1.72  |
| 7 O  | 8.805908446000  | 8.610797375000  | 13.395914220000 | R=1.72  |
| 8 C  | 11.657128390000 | 10.402192180000 | 14.370578730000 | R=2.00  |
| 9 C  | 12.403771350000 | 9.238275033000  | 14.163872400000 | R=2.00  |
| 10 H | 13.210524190000 | 9.023057112000  | 14.862300990000 | R=1.30  |
| 11 C | 12.239002630000 | 8.370808062000  | 13.062270010000 | R=2.00  |
| 12 C | 11.964520200000 | 11.311835950000 | 15.529330990000 | R=2.00  |
| 13 H | 12.235355850000 | 12.309028740000 | 15.151433290000 | R=1.30  |
| 14 H | 12.781033770000 | 10.925585050000 | 16.148819160000 | R=1.30  |
| 15 H | 11.063127550000 | 11.434744260000 | 16.147991180000 | R=1.30  |
| 16 C | 13.166315580000 | 7.197547803000  | 12.880974740000 | R=2.00  |
| 17 H | 12.586493650000 | 6.263965758000  | 12.937706440000 | R=1.30  |
| 18 H | 13.956752060000 | 7.175475989000  | 13.638963790000 | R=1.30  |
| 19 H | 13.618709530000 | 7.237288670000  | 11.879468310000 | R=1.30  |
| 20 C | 10.492647480000 | 11.088623740000 | 9.540091836000  | R=2.00  |
| 21 C | 9.612465733000  | 10.253550530000 | 8.817964960000  | R=2.00  |
| 22 H | 9.500913123000  | 10.436471060000 | 7.750690047000  | R=1.30  |
| 23 C | 8.949205752000  | 9.149581834000  | 9.361944843000  | R=2.00  |
| 24 C | 11.259403420000 | 12.172754890000 | 8.828253483000  | R=2.00  |
| 25 H | 11.041313150000 | 13.144883600000 | 9.294210079000  | R=1.30  |
| 26 H | 11.014149000000 | 12.217883560000 | 7.761661287000  | R=1.30  |
| 27 H | 12.338502930000 | 11.992477250000 | 8.944144759000  | R=1.30  |
| 28 C | 8.106733144000  | 8.256309428000  | 8.492023433000  | R=2.00  |
| 29 H | 8.515154469000  | 7.234783460000  | 8.511980855000  | R=1.30  |
| 30 H | 8.068478118000  | 8.610185722000  | 7.456145627000  | R=1.30  |

|      |                |                 |                 |        |
|------|----------------|-----------------|-----------------|--------|
| 31 H | 7.085990799000 | 8.203943402000  | 8.898788842000  | R=1.30 |
| 32 C | 7.155495349000 | 10.987950670000 | 12.869550160000 | R=2.00 |
| 33 C | 6.811752205000 | 9.895704661000  | 13.682108700000 | R=2.00 |
| 34 H | 5.842723158000 | 9.923880773000  | 14.177877030000 | R=1.30 |
| 35 C | 7.624342459000 | 8.772460924000  | 13.910281570000 | R=2.00 |
| 36 C | 6.209236716000 | 12.148373780000 | 12.713630950000 | R=2.00 |
| 37 H | 6.702692391000 | 13.072291200000 | 13.050334190000 | R=1.30 |
| 38 H | 5.285056553000 | 12.004337510000 | 13.283690580000 | R=1.30 |
| 39 H | 5.963096912000 | 12.282772720000 | 11.649863380000 | R=1.30 |
| 40 C | 7.146871852000 | 7.656161473000  | 14.800247010000 | R=2.00 |
| 41 H | 7.131254747000 | 6.714899762000  | 14.230796610000 | R=1.30 |
| 42 H | 6.147419211000 | 7.850800779000  | 15.203876190000 | R=1.30 |
| 43 H | 7.853974653000 | 7.519248648000  | 15.631903820000 | R=1.30 |

END

#### GUIBONDS

1 1 2 1.0  
2 1 3 1.0  
3 1 4 1.0  
4 1 5 1.0  
5 1 6 1.0  
6 1 7 1.0  
7 2 8 1.0  
8 3 11 1.0  
9 4 20 1.0  
10 5 23 1.0  
11 6 32 1.0  
12 7 35 1.0  
13 8 9 1.0  
14 8 12 1.0  
15 9 10 1.0  
16 9 11 1.0  
17 11 16 1.0  
18 12 13 1.0  
19 12 14 1.0  
20 12 15 1.0  
21 16 17 1.0  
22 16 18 1.0  
23 16 19 1.0  
24 20 21 1.0  
25 20 24 1.0  
26 21 22 1.0  
27 21 23 1.0  
28 23 28 1.0  
29 24 25 1.0  
30 24 26 1.0

31 24 27 1.0  
32 28 29 1.0  
33 28 30 1.0  
34 28 31 1.0  
35 32 33 1.0  
36 32 36 1.0  
37 33 34 1.0  
38 33 35 1.0  
39 35 40 1.0  
40 36 37 1.0  
41 36 38 1.0  
42 36 39 1.0  
43 40 41 1.0  
44 40 42 1.0  
45 40 43 1.0  
END

SOLVATION

Surf Delley  
Div ndiv=4  
Solvent name=CRS cav0=0.0 cav1=0.0  
Charged method=CONJ conv=1.0E-06 iter=300 corr  
C-Mat EXACT  
SCF VAR ALL  
CSMRSP

END

CHARGE 0.0 3.0

UNRESTRICTED

BASIS

type TZP  
core Small  
createoutput None  
END

XC

GGA Becke Perdew  
END

RELATIVISTIC Scalar ZORA

RESTART GASPHASE.t21

SCF  
iterations 50  
mixing 0.2  
diis  
END

BeckeGrid  
Quality Good  
End

ZlmFit  
Quality Normal  
End

ALLPOINTS  
NOPRINT LOGFILE

eor

# =====  
# COSKF  
# =====

rm -f COSKF  
"\$ADFBIN/cpkf" TAPE21 COSKF COSMO

#!/bin/sh

# =====  
# The Molecule  
# =====

"\$ADFBIN/adf" <<eor

TITLE metalcomplex-IV

ATOMS

|      |                 |                 |                 |         |
|------|-----------------|-----------------|-----------------|---------|
| 1 Ru | 0.109518418000  | 0.008697842000  | -0.053327540000 | R=1.950 |
| 2 O  | 1.029106664000  | 1.004495466000  | 1.396361990000  | R=1.72  |
| 3 O  | 1.676964744000  | -1.267159961000 | -0.042439360000 | R=1.72  |
| 4 O  | 1.061359164000  | 1.174885856000  | -1.396863410000 | R=1.72  |
| 5 O  | -0.634325048000 | -0.997053275000 | -1.585998230000 | R=1.72  |
| 6 O  | -1.386678492000 | 1.294341996000  | 0.013744210000  | R=1.72  |

|      |                 |                 |                 |        |
|------|-----------------|-----------------|-----------------|--------|
| 7 O  | -0.853644580000 | -1.181341579000 | 1.196909840000  | R=1.72 |
| 8 C  | 1.997575364000  | 0.610053226000  | 2.171574350000  | R=2.00 |
| 9 C  | 2.744218324000  | -0.553863921000 | 1.964868020000  | R=2.00 |
| 10 H | 3.550971164000  | -0.769081842000 | 2.663296610000  | R=1.30 |
| 11 C | 2.579449604000  | -1.421330892000 | 0.863265630000  | R=2.00 |
| 12 C | 2.304967174000  | 1.519696996000  | 3.330326610000  | R=2.00 |
| 13 H | 2.575802824000  | 2.516889786000  | 2.952428910000  | R=1.30 |
| 14 H | 3.121480744000  | 1.133446096000  | 3.949814780000  | R=1.30 |
| 15 H | 1.403574524000  | 1.642605306000  | 3.948986800000  | R=1.30 |
| 16 C | 3.506762554000  | -2.594591151000 | 0.681970360000  | R=2.00 |
| 17 H | 2.926940624000  | -3.528173196000 | 0.738702060000  | R=1.30 |
| 18 H | 4.297199034000  | -2.616662965000 | 1.439959410000  | R=1.30 |
| 19 H | 3.959156504000  | -2.554850284000 | -0.319536070000 | R=1.30 |
| 20 C | 0.833094454000  | 1.296484786000  | -2.658912544000 | R=2.00 |
| 21 C | -0.047087293000 | 0.461411576000  | -3.381039420000 | R=2.00 |
| 22 H | -0.158639903000 | 0.644332106000  | -4.448314333000 | R=1.30 |
| 23 C | -0.710347274000 | -0.642557120000 | -2.837059537000 | R=2.00 |
| 24 C | 1.599850394000  | 2.380615936000  | -3.370750897000 | R=2.00 |
| 25 H | 1.381760124000  | 3.352744646000  | -2.904794301000 | R=1.30 |
| 26 H | 1.354595974000  | 2.425744606000  | -4.437343093000 | R=1.30 |
| 27 H | 2.678949904000  | 2.200338296000  | -3.254859621000 | R=1.30 |
| 28 C | -1.552819882000 | -1.535829526000 | -3.706980947000 | R=2.00 |
| 29 H | -1.144398557000 | -2.557355494000 | -3.687023525000 | R=1.30 |
| 30 H | -1.591074908000 | -1.181953232000 | -4.742858753000 | R=1.30 |
| 31 H | -2.573562227000 | -1.588195552000 | -3.300215538000 | R=1.30 |
| 32 C | -2.504057677000 | 1.195811716000  | 0.670545780000  | R=2.00 |
| 33 C | -2.847800821000 | 0.103565707000  | 1.483104320000  | R=2.00 |
| 34 H | -3.816829868000 | 0.131741819000  | 1.978872650000  | R=1.30 |
| 35 C | -2.035210567000 | -1.019678030000 | 1.711277190000  | R=2.00 |
| 36 C | -3.450316310000 | 2.356234826000  | 0.514626570000  | R=2.00 |
| 37 H | -2.956860635000 | 3.280152246000  | 0.851329810000  | R=1.30 |
| 38 H | -4.374496473000 | 2.212198556000  | 1.084686200000  | R=1.30 |
| 39 H | -3.696456114000 | 2.490633766000  | -0.549141000000 | R=1.30 |
| 40 C | -2.512681174000 | -2.135977481000 | 2.601242630000  | R=2.00 |
| 41 H | -2.528298279000 | -3.077239192000 | 2.031792230000  | R=1.30 |
| 42 H | -3.512133815000 | -1.941338175000 | 3.004871810000  | R=1.30 |
| 43 H | -1.805578373000 | -2.272890306000 | 3.432899440000  | R=1.30 |

END

#### GUIBONDS

1 1 2 1.0  
2 1 3 1.0  
3 1 4 1.0  
4 1 5 1.0  
5 1 6 1.0  
6 1 7 1.0

7 2 8 1.0  
8 3 11 1.0  
9 4 20 1.0  
10 5 23 1.0  
11 6 32 1.0  
12 7 35 1.0  
13 8 9 1.0  
14 8 12 1.0  
15 9 10 1.0  
16 9 11 1.0  
17 11 16 1.0  
18 12 13 1.0  
19 12 14 1.0  
20 12 15 1.0  
21 16 17 1.0  
22 16 18 1.0  
23 16 19 1.0  
24 20 21 1.0  
25 20 24 1.0  
26 21 22 1.0  
27 21 23 1.0  
28 23 28 1.0  
29 24 25 1.0  
30 24 26 1.0  
31 24 27 1.0  
32 28 29 1.0  
33 28 30 1.0  
34 28 31 1.0  
35 32 33 1.0  
36 32 36 1.0  
37 33 34 1.0  
38 33 35 1.0  
39 35 40 1.0  
40 36 37 1.0  
41 36 38 1.0  
42 36 39 1.0  
43 40 41 1.0  
44 40 42 1.0  
45 40 43 1.0  
END

#### SOLVATION

Surf Delley

Div ndiv=4

Solvent name=CRS cav0=0.0 cav1=0.0

Charged method=CONJ conv=1.0E-06 iter=300 corr

C-Mat EXACT  
SCF VAR ALL  
CSMRSP  
END

CHARGE 0.0 3.0

UNRESTRICTED

BASIS  
type TZP  
core Small  
createoutput None  
END

XC  
GGA Becke Perdew  
END

RELATIVISTIC Scalar ZORA

GEOMETRY  
branch New  
iterations 100  
END

SCF  
iterations 50  
mixing 0.2  
diis  
END

BeckeGrid  
Quality Good  
End

ZlmFit  
Quality Normal  
End

ALLPOINTS  
NOPRINT LOGFILE



eor

# =====  
# COSKF  
# =====

rm -f COSKF  
"\$ADFBIN/cpkf" TAPE21 COSKF COSMO

mv TAPE21 GASPHASE.t21

# COSMO-RS Solvent calculation

# =====  
# The Molecule  
# =====

"\$ADFBIN/adf" <<eor  
TITLE metalcomplex-IV

ATOMS

|      |                 |                 |                 |         |
|------|-----------------|-----------------|-----------------|---------|
| 1 Ru | 0.109518418000  | 0.008697842000  | -0.053327540000 | R=1.950 |
| 2 O  | 1.029106664000  | 1.004495466000  | 1.396361990000  | R=1.72  |
| 3 O  | 1.676964744000  | -1.267159961000 | -0.042439360000 | R=1.72  |
| 4 O  | 1.061359164000  | 1.174885856000  | -1.396863410000 | R=1.72  |
| 5 O  | -0.634325048000 | -0.997053275000 | -1.585998230000 | R=1.72  |
| 6 O  | -1.386678492000 | 1.294341996000  | 0.013744210000  | R=1.72  |
| 7 O  | -0.853644580000 | -1.181341579000 | 1.196909840000  | R=1.72  |
| 8 C  | 1.997575364000  | 0.610053226000  | 2.171574350000  | R=2.00  |
| 9 C  | 2.744218324000  | -0.553863921000 | 1.964868020000  | R=2.00  |
| 10 H | 3.550971164000  | -0.769081842000 | 2.663296610000  | R=1.30  |
| 11 C | 2.579449604000  | -1.421330892000 | 0.863265630000  | R=2.00  |
| 12 C | 2.304967174000  | 1.519696996000  | 3.330326610000  | R=2.00  |
| 13 H | 2.575802824000  | 2.516889786000  | 2.952428910000  | R=1.30  |
| 14 H | 3.121480744000  | 1.133446096000  | 3.949814780000  | R=1.30  |
| 15 H | 1.403574524000  | 1.642605306000  | 3.948986800000  | R=1.30  |
| 16 C | 3.506762554000  | -2.594591151000 | 0.681970360000  | R=2.00  |
| 17 H | 2.926940624000  | -3.528173196000 | 0.738702060000  | R=1.30  |
| 18 H | 4.297199034000  | -2.616662965000 | 1.439959410000  | R=1.30  |
| 19 H | 3.959156504000  | -2.554850284000 | -0.319536070000 | R=1.30  |
| 20 C | 0.833094454000  | 1.296484786000  | -2.658912544000 | R=2.00  |
| 21 C | -0.047087293000 | 0.461411576000  | -3.381039420000 | R=2.00  |
| 22 H | -0.158639903000 | 0.644332106000  | -4.448314333000 | R=1.30  |
| 23 C | -0.710347274000 | -0.642557120000 | -2.837059537000 | R=2.00  |
| 24 C | 1.599850394000  | 2.380615936000  | -3.370750897000 | R=2.00  |
| 25 H | 1.381760124000  | 3.352744646000  | -2.904794301000 | R=1.30  |

|      |                 |                 |                 |        |
|------|-----------------|-----------------|-----------------|--------|
| 26 H | 1.354595974000  | 2.425744606000  | -4.437343093000 | R=1.30 |
| 27 H | 2.678949904000  | 2.200338296000  | -3.254859621000 | R=1.30 |
| 28 C | -1.552819882000 | -1.535829526000 | -3.706980947000 | R=2.00 |
| 29 H | -1.144398557000 | -2.557355494000 | -3.687023525000 | R=1.30 |
| 30 H | -1.591074908000 | -1.181953232000 | -4.742858753000 | R=1.30 |
| 31 H | -2.573562227000 | -1.588195552000 | -3.300215538000 | R=1.30 |
| 32 C | -2.504057677000 | 1.195811716000  | 0.670545780000  | R=2.00 |
| 33 C | -2.847800821000 | 0.103565707000  | 1.483104320000  | R=2.00 |
| 34 H | -3.816829868000 | 0.131741819000  | 1.978872650000  | R=1.30 |
| 35 C | -2.035210567000 | -1.019678030000 | 1.711277190000  | R=2.00 |
| 36 C | -3.450316310000 | 2.356234826000  | 0.514626570000  | R=2.00 |
| 37 H | -2.956860635000 | 3.280152246000  | 0.851329810000  | R=1.30 |
| 38 H | -4.374496473000 | 2.212198556000  | 1.084686200000  | R=1.30 |
| 39 H | -3.696456114000 | 2.490633766000  | -0.549141000000 | R=1.30 |
| 40 C | -2.512681174000 | -2.135977481000 | 2.601242630000  | R=2.00 |
| 41 H | -2.528298279000 | -3.077239192000 | 2.031792230000  | R=1.30 |
| 42 H | -3.512133815000 | -1.941338175000 | 3.004871810000  | R=1.30 |
| 43 H | -1.805578373000 | -2.272890306000 | 3.432899440000  | R=1.30 |
| END  |                 |                 |                 |        |

#### GUIBONDS

1 1 2 1.0  
2 1 3 1.0  
3 1 4 1.0  
4 1 5 1.0  
5 1 6 1.0  
6 1 7 1.0  
7 2 8 1.0  
8 3 11 1.0  
9 4 20 1.0  
10 5 23 1.0  
11 6 32 1.0  
12 7 35 1.0  
13 8 9 1.0  
14 8 12 1.0  
15 9 10 1.0  
16 9 11 1.0  
17 11 16 1.0  
18 12 13 1.0  
19 12 14 1.0  
20 12 15 1.0  
21 16 17 1.0  
22 16 18 1.0  
23 16 19 1.0  
24 20 21 1.0  
25 20 24 1.0

26 21 22 1.0  
27 21 23 1.0  
28 23 28 1.0  
29 24 25 1.0  
30 24 26 1.0  
31 24 27 1.0  
32 28 29 1.0  
33 28 30 1.0  
34 28 31 1.0  
35 32 33 1.0  
36 32 36 1.0  
37 33 34 1.0  
38 33 35 1.0  
39 35 40 1.0  
40 36 37 1.0  
41 36 38 1.0  
42 36 39 1.0  
43 40 41 1.0  
44 40 42 1.0  
45 40 43 1.0  
END

SOLVATION

Surf Delley

Div ndiv=4

Solvent name=CRS cav0=0.0 cav1=0.0

Charged method=CONJ conv=1.0E-06 iter=300 corr

C-Mat EXACT

SCF VAR ALL

CSMRSP

END

CHARGE 0.0 3.0

UNRESTRICTED

BASIS

type TZP

core Small

createoutput None

END

XC

GGA Becke Perdew

END

RELATIVISTIC Scalar ZORA

RESTART GASPHASE.t21

SCF  
iterations 50  
mixing 0.2  
diis  
END

BeckeGrid  
Quality Good  
End

ZlmFit  
Quality Normal  
End

ALLPOINTS  
NOPRINT LOGFILE

eor

# =====  
# COSKF  
# =====

rm -f COSKF  
"\$ADFBIN/cpkf" TAPE21 COSKF COSMO

#!/bin/sh

# =====  
# The Molecule  
# =====

"\$ADFBIN/adf" <<eor

TITLE metalcomplex-VI

ATOMS

|      |                 |                 |                 |         |
|------|-----------------|-----------------|-----------------|---------|
| 1 Cr | 0.193747440000  | 0.413827560000  | 0.403846490000  | R=1.875 |
| 2 O  | -0.650481560000 | 0.036987790000  | 2.136073870000  | R=1.72  |
| 3 O  | 0.458931650000  | 2.315845320000  | 0.833650210000  | R=1.72  |
| 4 O  | 1.954364390000  | -0.107764820000 | 1.097352670000  | R=1.72  |
| 5 O  | 0.926799510000  | 0.702080560000  | -1.383165760000 | R=1.72  |
| 6 O  | -0.077314470000 | -1.483217430000 | 0.000229650000  | R=1.72  |
| 7 O  | -1.575249380000 | 0.962631850000  | -0.238046970000 | R=1.72  |
| 8 C  | 0.008230770000  | 0.565961630000  | 3.247498760000  | R=2.00  |
| 9 C  | -0.039083210000 | 2.102433620000  | 3.210557240000  | R=2.00  |
| 10 H | -1.041677560000 | 4.519625140000  | 4.090839070000  | R=1.30  |
| 11 C | 0.943346610000  | 2.579903980000  | 2.127514170000  | R=2.00  |
| 12 C | -0.631198360000 | 0.000028600000  | 4.520019390000  | R=2.00  |
| 13 H | -0.547765570000 | -1.107616690000 | 4.517181630000  | R=1.30  |
| 14 H | -1.706025010000 | 0.263796200000  | 4.592221230000  | R=1.30  |
| 15 H | -0.102258940000 | 0.382155850000  | 5.418044930000  | R=1.30  |
| 16 C | 1.231191070000  | 4.079497200000  | 2.241084150000  | R=2.00  |
| 17 H | 2.015719670000  | 4.364853110000  | 1.508040120000  | R=1.30  |
| 18 H | 1.598519350000  | 4.330810140000  | 3.258913350000  | R=1.30  |
| 19 H | 0.320749360000  | 4.675659890000  | 2.022210310000  | R=1.30  |
| 20 C | 3.057053780000  | 0.053947960000  | 0.234761340000  | R=2.00  |
| 21 C | 3.085315600000  | 1.440064420000  | -0.456570770000 | R=2.00  |
| 22 H | -4.528562800000 | -1.471360050000 | -2.107622870000 | R=1.30  |
| 23 C | 1.952405970000  | 1.647416230000  | -1.513346110000 | R=2.00  |
| 24 C | 3.225481610000  | -1.144446270000 | -0.706088740000 | R=2.00  |
| 25 H | 2.451403510000  | -1.180398340000 | -1.489565040000 | R=1.30  |
| 26 H | -3.825106850000 | -1.523500860000 | 0.097488220000  | R=1.30  |
| 27 H | 4.216770160000  | -1.098243380000 | -1.204217920000 | R=1.30  |
| 28 C | 2.415355510000  | 1.564353340000  | -2.976646070000 | R=2.00  |
| 29 H | 1.535022660000  | 1.646410020000  | -3.649801500000 | R=1.30  |
| 30 H | 2.909277940000  | 0.590656960000  | -3.178250950000 | R=1.30  |
| 31 H | -3.398186980000 | -0.191882040000 | 1.202426980000  | R=1.30  |
| 32 C | -0.526896030000 | -1.817745010000 | -1.291208850000 | R=2.00  |
| 33 C | -1.638308510000 | -0.861429470000 | -1.815035290000 | R=2.00  |
| 34 C | -2.533638880000 | -1.407792480000 | -2.969328120000 | R=2.00  |
| 35 C | -2.386563420000 | -0.076118510000 | -0.718289580000 | R=2.00  |
| 36 C | -0.927353660000 | -3.296971700000 | -1.245651310000 | R=2.00  |
| 37 H | -0.061929470000 | -3.899566840000 | -0.895729190000 | R=1.30  |
| 38 H | -1.206026440000 | -3.682853490000 | -2.246852990000 | R=1.30  |
| 39 H | -1.757207960000 | -3.458322860000 | -0.527902380000 | R=1.30  |
| 40 C | -2.986963930000 | -0.889822700000 | 0.442367630000  | R=2.00  |
| 41 H | -2.255029340000 | -1.544566920000 | 0.946858730000  | R=1.30  |
| 42 H | 3.102164000000  | 2.391094420000  | -3.243446160000 | R=1.30  |
| 43 H | 3.176022850000  | -2.087913330000 | -0.122273120000 | R=1.30  |
| 44 C | -1.484808290000 | 2.665071000000  | 3.004980250000  | R=2.00  |
| 45 H | -2.252375440000 | 1.864068440000  | 3.061982450000  | R=1.30  |

|      |                 |                 |                 |        |
|------|-----------------|-----------------|-----------------|--------|
| 46 H | -1.597329710000 | 3.086853730000  | 1.983509490000  | R=1.30 |
| 47 C | -2.164517200000 | 3.206808870000  | 5.366660010000  | R=2.00 |
| 48 H | -2.754311780000 | 4.303112080000  | 3.625396930000  | R=1.30 |
| 49 H | -0.673900040000 | 1.544392840000  | 9.253151040000  | R=1.30 |
| 50 C | -1.856277020000 | 3.769510500000  | 4.007774420000  | R=2.00 |
| 51 O | -1.105526740000 | 2.923392250000  | 6.229404780000  | R=1.72 |
| 52 H | 0.347257500000  | 1.322241380000  | 7.778869320000  | R=1.30 |
| 53 H | 0.204889280000  | 2.955939170000  | 8.544226980000  | R=1.30 |
| 54 H | -2.076048040000 | 1.367349840000  | 7.220543620000  | R=1.30 |
| 55 C | -1.545165270000 | 2.324054520000  | 7.430695570000  | R=2.00 |
| 56 C | -0.339662850000 | 2.017726080000  | 8.305855750000  | R=2.00 |
| 57 H | -2.216070370000 | 3.014733610000  | 7.990578050000  | R=1.30 |
| 58 O | -3.336866780000 | 3.032035810000  | 5.682880080000  | R=1.72 |
| 59 C | 4.520570080000  | 1.811606270000  | -0.934290960000 | R=2.00 |
| 60 H | 4.770221720000  | 1.297626070000  | -1.885707320000 | R=1.30 |
| 61 H | 5.268075600000  | 1.453057970000  | -0.192794560000 | R=1.30 |
| 62 C | 4.717847350000  | 3.332937570000  | -1.055708530000 | R=2.00 |
| 63 H | 4.658075620000  | 3.789300290000  | -0.042500220000 | R=1.30 |
| 64 H | 3.921015200000  | 3.795527300000  | -1.672192860000 | R=1.30 |
| 65 C | 6.047422400000  | 3.645808770000  | -1.676146930000 | R=2.00 |
| 66 H | 7.548201540000  | 3.584045140000  | -4.570637390000 | R=1.30 |
| 67 C | 7.571396770000  | 3.559075800000  | -3.460706650000 | R=2.00 |
| 68 O | 6.257597000000  | 3.285227170000  | -3.009027500000 | R=1.72 |
| 69 H | 8.634638030000  | 2.418148700000  | -1.935225790000 | R=1.30 |
| 70 O | -3.726460940000 | -3.917732970000 | -4.326222590000 | R=1.72 |
| 71 O | 6.898404160000  | 4.215252750000  | -1.001638940000 | R=1.72 |
| 72 C | -3.794024320000 | -2.180323090000 | -2.546925050000 | R=2.00 |
| 73 C | -4.416547970000 | -2.860745180000 | -3.731295950000 | R=2.00 |
| 74 H | 7.940970480000  | 4.559988430000  | -3.140825870000 | R=1.30 |
| 75 H | -4.174347970000 | -6.050784890000 | -6.871864930000 | R=1.30 |
| 76 H | 1.057955420000  | 0.210407380000  | 3.269239150000  | R=1.30 |
| 77 H | 0.366531960000  | 2.452884660000  | 4.185472430000  | R=1.30 |
| 78 H | 1.915865090000  | 2.072751050000  | 2.286647720000  | R=1.30 |
| 79 H | 3.940120280000  | 0.014388310000  | 0.909189090000  | R=1.30 |
| 80 H | 2.891738350000  | 2.165763170000  | 0.349712500000  | R=1.30 |
| 81 H | -3.565234470000 | -2.955075220000 | -1.792730600000 | R=1.30 |
| 82 H | 1.517461230000  | 2.661682410000  | -1.382768590000 | R=1.30 |
| 83 H | 0.331180900000  | -1.760152960000 | -1.992205770000 | R=1.30 |
| 84 H | -1.076991860000 | -0.072504920000 | -2.359528700000 | R=1.30 |
| 85 H | -1.908074300000 | -2.025845810000 | -3.649615100000 | R=1.30 |
| 86 H | -2.876220280000 | -0.544882670000 | -3.584900400000 | R=1.30 |
| 87 H | -3.247618260000 | 0.427468100000  | -1.209384410000 | R=1.30 |
| 88 H | 8.166488830000  | 1.469808980000  | -3.402075810000 | R=1.30 |
| 89 H | 9.537807280000  | 2.643809630000  | -3.479678310000 | R=1.30 |
| 90 C | 8.536277650000  | 2.452518590000  | -3.040112160000 | R=2.00 |
| 91 H | -2.640865140000 | -5.240482930000 | -6.362121420000 | R=1.30 |

|      |                 |                 |                 |        |
|------|-----------------|-----------------|-----------------|--------|
| 92 C | -4.433582230000 | -4.465462680000 | -5.419614710000 | R=2.00 |
| 93 H | -4.584341930000 | -3.697979570000 | -6.212800020000 | R=1.30 |
| 94 H | -5.418603310000 | -4.867053090000 | -5.088657380000 | R=1.30 |
| 95 C | -3.627286530000 | -5.611324310000 | -6.011155170000 | R=2.00 |
| 96 H | -3.468604740000 | -6.399528510000 | -5.244730460000 | R=1.30 |
| 97 O | -5.512983380000 | -2.480430760000 | -4.129137050000 | R=1.72 |

END

#### GUIBONDS

1 1 2 1.0  
2 1 3 1.0  
3 1 4 1.0  
4 1 5 1.0  
5 1 6 1.0  
6 1 7 1.0  
7 2 8 1.0  
8 3 11 1.0  
9 4 20 1.0  
10 5 23 1.0  
11 6 32 1.0  
12 7 35 1.0  
13 8 9 1.0  
14 8 12 1.0  
15 55 51 1.0  
16 9 11 1.0  
17 11 16 1.0  
18 12 13 1.0  
19 12 14 1.0  
20 12 15 1.0  
21 16 17 1.0  
22 16 18 1.0  
23 16 19 1.0  
24 20 21 1.0  
25 20 24 1.0  
26 59 61 1.0  
27 21 23 1.0  
28 23 28 1.0  
29 24 25 1.0  
30 40 26 1.0  
31 24 27 1.0  
32 28 29 1.0  
33 28 30 1.0  
34 40 31 1.0  
35 32 33 1.0  
36 32 36 1.0  
37 34 33 1.0

38 33 35 1.0  
39 35 40 1.0  
40 36 37 1.0  
41 36 38 1.0  
42 36 39 1.0  
43 40 41 1.0  
44 42 28 1.0  
45 43 24 1.0  
46 50 10 1.0  
47 44 45 1.0  
48 44 46 1.0  
49 50 44 1.0  
50 50 48 1.0  
51 44 9 1.0  
52 50 47 1.0  
53 56 52 1.0  
54 56 49 1.0  
55 55 54 1.0  
56 51 47 1.0  
57 55 56 1.0  
58 56 53 1.0  
59 55 57 1.0  
60 58 47 2.0  
61 59 21 1.0  
62 59 60 1.0  
63 62 65 1.0  
64 62 63 1.0  
65 62 64 1.0  
66 62 59 1.0  
67 90 69 1.0  
68 68 65 1.0  
69 95 91 1.0  
70 67 90 1.0  
71 67 66 1.0  
72 71 65 2.0  
73 72 73 1.0  
74 72 34 1.0  
75 67 74 1.0  
76 92 70 1.0  
77 76 8 1.0  
78 77 9 1.0  
79 78 11 1.0  
80 79 20 1.0  
81 80 21 1.0  
82 22 72 1.0  
83 82 23 1.0



84 83 32 1.0  
85 84 33 1.0  
86 85 34 1.0  
87 86 34 1.0  
88 87 35 1.0  
89 90 89 1.0  
90 67 68 1.0  
91 70 73 1.0  
92 90 88 1.0  
93 92 95 1.0  
94 92 93 1.0  
95 92 94 1.0  
96 95 96 1.0  
97 95 75 1.0  
98 97 73 2.0  
99 81 72 1.0  
END

SOLVATION

Surf Delley

Div ndiv=4

Solvent name=CRS cav0=0.0 cav1=0.0

Charged method=CONJ conv=1.0E-06 iter=300 corr

C-Mat EXACT

SCF VAR ALL

CSMRSP

END

CHARGE 0.0 2.0

UNRESTRICTED

BASIS

type TZP

core Small

createoutput None

END

XC

GGA Becke Perdew

END

RELATIVISTIC Scalar ZORA

GEOMETRY  
branch New  
iterations 100  
END

SCF  
iterations 50  
mixing 0.2  
diis  
END

BeckeGrid  
Quality Good  
End

ZlmFit  
Quality Normal  
End

ALLPOINTS  
NOPRINT LOGFILE

eor

# =====  
# COSKF  
# =====

rm -f COSKF  
"\$ADFBIN/cpkf" TAPE21 COSKF COSMO

mv TAPE21 GASPHASE.t21

# COSMO-RS Solvent calculation

# =====  
# The Molecule  
# =====

"\$ADFBIN/adf" <<eor  
TITLE metalcomplex-VI

ATOMS  
1 Cr 0.193747440000 0.413827560000 0.403846490000 R=1.875  
2 O -0.650481560000 0.036987790000 2.136073870000 R=1.72

|      |                 |                 |                 |        |
|------|-----------------|-----------------|-----------------|--------|
| 3 O  | 0.458931650000  | 2.315845320000  | 0.833650210000  | R=1.72 |
| 4 O  | 1.954364390000  | -0.107764820000 | 1.097352670000  | R=1.72 |
| 5 O  | 0.926799510000  | 0.702080560000  | -1.383165760000 | R=1.72 |
| 6 O  | -0.077314470000 | -1.483217430000 | 0.000229650000  | R=1.72 |
| 7 O  | -1.575249380000 | 0.962631850000  | -0.238046970000 | R=1.72 |
| 8 C  | 0.008230770000  | 0.565961630000  | 3.247498760000  | R=2.00 |
| 9 C  | -0.039083210000 | 2.102433620000  | 3.210557240000  | R=2.00 |
| 10 H | -1.041677560000 | 4.519625140000  | 4.090839070000  | R=1.30 |
| 11 C | 0.943346610000  | 2.579903980000  | 2.127514170000  | R=2.00 |
| 12 C | -0.631198360000 | 0.000028600000  | 4.520019390000  | R=2.00 |
| 13 H | -0.547765570000 | -1.107616690000 | 4.517181630000  | R=1.30 |
| 14 H | -1.706025010000 | 0.263796200000  | 4.592221230000  | R=1.30 |
| 15 H | -0.102258940000 | 0.382155850000  | 5.418044930000  | R=1.30 |
| 16 C | 1.231191070000  | 4.079497200000  | 2.241084150000  | R=2.00 |
| 17 H | 2.015719670000  | 4.364853110000  | 1.508040120000  | R=1.30 |
| 18 H | 1.598519350000  | 4.330810140000  | 3.258913350000  | R=1.30 |
| 19 H | 0.320749360000  | 4.675659890000  | 2.022210310000  | R=1.30 |
| 20 C | 3.057053780000  | 0.053947960000  | 0.234761340000  | R=2.00 |
| 21 C | 3.085315600000  | 1.440064420000  | -0.456570770000 | R=2.00 |
| 22 H | -4.528562800000 | -1.471360050000 | -2.107622870000 | R=1.30 |
| 23 C | 1.952405970000  | 1.647416230000  | -1.513346110000 | R=2.00 |
| 24 C | 3.225481610000  | -1.144446270000 | -0.706088740000 | R=2.00 |
| 25 H | 2.451403510000  | -1.180398340000 | -1.489565040000 | R=1.30 |
| 26 H | -3.825106850000 | -1.523500860000 | 0.097488220000  | R=1.30 |
| 27 H | 4.216770160000  | -1.098243380000 | -1.204217920000 | R=1.30 |
| 28 C | 2.415355510000  | 1.564353340000  | -2.976646070000 | R=2.00 |
| 29 H | 1.535022660000  | 1.646410020000  | -3.649801500000 | R=1.30 |
| 30 H | 2.909277940000  | 0.590656960000  | -3.178250950000 | R=1.30 |
| 31 H | -3.398186980000 | -0.191882040000 | 1.202426980000  | R=1.30 |
| 32 C | -0.526896030000 | -1.817745010000 | -1.291208850000 | R=2.00 |
| 33 C | -1.638308510000 | -0.861429470000 | -1.815035290000 | R=2.00 |
| 34 C | -2.533638880000 | -1.407792480000 | -2.969328120000 | R=2.00 |
| 35 C | -2.386563420000 | -0.076118510000 | -0.718289580000 | R=2.00 |
| 36 C | -0.927353660000 | -3.296971700000 | -1.245651310000 | R=2.00 |
| 37 H | -0.061929470000 | -3.899566840000 | -0.895729190000 | R=1.30 |
| 38 H | -1.206026440000 | -3.682853490000 | -2.246852990000 | R=1.30 |
| 39 H | -1.757207960000 | -3.458322860000 | -0.527902380000 | R=1.30 |
| 40 C | -2.986963930000 | -0.889822700000 | 0.442367630000  | R=2.00 |
| 41 H | -2.255029340000 | -1.544566920000 | 0.946858730000  | R=1.30 |
| 42 H | 3.102164000000  | 2.391094420000  | -3.243446160000 | R=1.30 |
| 43 H | 3.176022850000  | -2.087913330000 | -0.122273120000 | R=1.30 |
| 44 C | -1.484808290000 | 2.665071000000  | 3.004980250000  | R=2.00 |
| 45 H | -2.252375440000 | 1.864068440000  | 3.061982450000  | R=1.30 |
| 46 H | -1.597329710000 | 3.086853730000  | 1.983509490000  | R=1.30 |
| 47 C | -2.164517200000 | 3.206808870000  | 5.366660010000  | R=2.00 |
| 48 H | -2.754311780000 | 4.303112080000  | 3.625396930000  | R=1.30 |

|      |                 |                 |                 |        |
|------|-----------------|-----------------|-----------------|--------|
| 49 H | -0.673900040000 | 1.544392840000  | 9.253151040000  | R=1.30 |
| 50 C | -1.856277020000 | 3.769510500000  | 4.007774420000  | R=2.00 |
| 51 O | -1.105526740000 | 2.923392250000  | 6.229404780000  | R=1.72 |
| 52 H | 0.347257500000  | 1.322241380000  | 7.778869320000  | R=1.30 |
| 53 H | 0.204889280000  | 2.955939170000  | 8.544226980000  | R=1.30 |
| 54 H | -2.076048040000 | 1.367349840000  | 7.220543620000  | R=1.30 |
| 55 C | -1.545165270000 | 2.324054520000  | 7.430695570000  | R=2.00 |
| 56 C | -0.339662850000 | 2.017726080000  | 8.305855750000  | R=2.00 |
| 57 H | -2.216070370000 | 3.014733610000  | 7.990578050000  | R=1.30 |
| 58 O | -3.336866780000 | 3.032035810000  | 5.682880080000  | R=1.72 |
| 59 C | 4.520570080000  | 1.811606270000  | -0.934290960000 | R=2.00 |
| 60 H | 4.770221720000  | 1.297626070000  | -1.885707320000 | R=1.30 |
| 61 H | 5.268075600000  | 1.453057970000  | -0.192794560000 | R=1.30 |
| 62 C | 4.717847350000  | 3.332937570000  | -1.055708530000 | R=2.00 |
| 63 H | 4.658075620000  | 3.789300290000  | -0.042500220000 | R=1.30 |
| 64 H | 3.921015200000  | 3.795527300000  | -1.672192860000 | R=1.30 |
| 65 C | 6.047422400000  | 3.645808770000  | -1.676146930000 | R=2.00 |
| 66 H | 7.548201540000  | 3.584045140000  | -4.570637390000 | R=1.30 |
| 67 C | 7.571396770000  | 3.559075800000  | -3.460706650000 | R=2.00 |
| 68 O | 6.257597000000  | 3.285227170000  | -3.009027500000 | R=1.72 |
| 69 H | 8.634638030000  | 2.418148700000  | -1.935225790000 | R=1.30 |
| 70 O | -3.726460940000 | -3.917732970000 | -4.326222590000 | R=1.72 |
| 71 O | 6.898404160000  | 4.215252750000  | -1.001638940000 | R=1.72 |
| 72 C | -3.794024320000 | -2.180323090000 | -2.546925050000 | R=2.00 |
| 73 C | -4.416547970000 | -2.860745180000 | -3.731295950000 | R=2.00 |
| 74 H | 7.940970480000  | 4.559988430000  | -3.140825870000 | R=1.30 |
| 75 H | -4.174347970000 | -6.050784890000 | -6.871864930000 | R=1.30 |
| 76 H | 1.057955420000  | 0.210407380000  | 3.269239150000  | R=1.30 |
| 77 H | 0.366531960000  | 2.452884660000  | 4.185472430000  | R=1.30 |
| 78 H | 1.915865090000  | 2.072751050000  | 2.286647720000  | R=1.30 |
| 79 H | 3.940120280000  | 0.014388310000  | 0.909189090000  | R=1.30 |
| 80 H | 2.891738350000  | 2.165763170000  | 0.349712500000  | R=1.30 |
| 81 H | -3.565234470000 | -2.955075220000 | -1.792730600000 | R=1.30 |
| 82 H | 1.517461230000  | 2.661682410000  | -1.382768590000 | R=1.30 |
| 83 H | 0.331180900000  | -1.760152960000 | -1.992205770000 | R=1.30 |
| 84 H | -1.076991860000 | -0.072504920000 | -2.359528700000 | R=1.30 |
| 85 H | -1.908074300000 | -2.025845810000 | -3.649615100000 | R=1.30 |
| 86 H | -2.876220280000 | -0.544882670000 | -3.584900400000 | R=1.30 |
| 87 H | -3.247618260000 | 0.427468100000  | -1.209384410000 | R=1.30 |
| 88 H | 8.166488830000  | 1.469808980000  | -3.402075810000 | R=1.30 |
| 89 H | 9.537807280000  | 2.643809630000  | -3.479678310000 | R=1.30 |
| 90 C | 8.536277650000  | 2.452518590000  | -3.040112160000 | R=2.00 |
| 91 H | -2.640865140000 | -5.240482930000 | -6.362121420000 | R=1.30 |
| 92 C | -4.433582230000 | -4.465462680000 | -5.419614710000 | R=2.00 |
| 93 H | -4.584341930000 | -3.697979570000 | -6.212800020000 | R=1.30 |
| 94 H | -5.418603310000 | -4.867053090000 | -5.088657380000 | R=1.30 |

|      |                 |                 |                 |        |
|------|-----------------|-----------------|-----------------|--------|
| 95 C | -3.627286530000 | -5.611324310000 | -6.011155170000 | R=2.00 |
| 96 H | -3.468604740000 | -6.399528510000 | -5.244730460000 | R=1.30 |
| 97 O | -5.512983380000 | -2.480430760000 | -4.129137050000 | R=1.72 |

END

#### GUIBONDS

1 1 2 1.0  
2 1 3 1.0  
3 1 4 1.0  
4 1 5 1.0  
5 1 6 1.0  
6 1 7 1.0  
7 2 8 1.0  
8 3 11 1.0  
9 4 20 1.0  
10 5 23 1.0  
11 6 32 1.0  
12 7 35 1.0  
13 8 9 1.0  
14 8 12 1.0  
15 55 51 1.0  
16 9 11 1.0  
17 11 16 1.0  
18 12 13 1.0  
19 12 14 1.0  
20 12 15 1.0  
21 16 17 1.0  
22 16 18 1.0  
23 16 19 1.0  
24 20 21 1.0  
25 20 24 1.0  
26 59 61 1.0  
27 21 23 1.0  
28 23 28 1.0  
29 24 25 1.0  
30 40 26 1.0  
31 24 27 1.0  
32 28 29 1.0  
33 28 30 1.0  
34 40 31 1.0  
35 32 33 1.0  
36 32 36 1.0  
37 34 33 1.0  
38 33 35 1.0  
39 35 40 1.0  
40 36 37 1.0

41 36 38 1.0  
42 36 39 1.0  
43 40 41 1.0  
44 42 28 1.0  
45 43 24 1.0  
46 50 10 1.0  
47 44 45 1.0  
48 44 46 1.0  
49 50 44 1.0  
50 50 48 1.0  
51 44 9 1.0  
52 50 47 1.0  
53 56 52 1.0  
54 56 49 1.0  
55 55 54 1.0  
56 51 47 1.0  
57 55 56 1.0  
58 56 53 1.0  
59 55 57 1.0  
60 58 47 2.0  
61 59 21 1.0  
62 59 60 1.0  
63 62 65 1.0  
64 62 63 1.0  
65 62 64 1.0  
66 62 59 1.0  
67 90 69 1.0  
68 68 65 1.0  
69 95 91 1.0  
70 67 90 1.0  
71 67 66 1.0  
72 71 65 2.0  
73 72 73 1.0  
74 72 34 1.0  
75 67 74 1.0  
76 92 70 1.0  
77 76 8 1.0  
78 77 9 1.0  
79 78 11 1.0  
80 79 20 1.0  
81 80 21 1.0  
82 22 72 1.0  
83 82 23 1.0  
84 83 32 1.0  
85 84 33 1.0  
86 85 34 1.0

87 86 34 1.0  
88 87 35 1.0  
89 90 89 1.0  
90 67 68 1.0  
91 70 73 1.0  
92 90 88 1.0  
93 92 95 1.0  
94 92 93 1.0  
95 92 94 1.0  
96 95 96 1.0  
97 95 75 1.0  
98 97 73 2.0  
99 81 72 1.0  
END

SOLVATION

Surf Delley  
Div ndiv=4  
Solvent name=CRS cav0=0.0 cav1=0.0  
Charged method=CONJ conv=1.0E-06 iter=300 corr  
C-Mat EXACT  
SCF VAR ALL  
CSMRSP

END

CHARGE 0.0 2.0

UNRESTRICTED

BASIS

type TZP  
core Small  
createoutput None  
END

XC

GGA Becke Perdew  
END

RELATIVISTIC Scalar ZORA

RESTART GASPHASE.t21

SCF

iterations 50  
mixing 0.2  
diis  
END

BeckeGrid  
Quality Good  
End

ZlmFit  
Quality Normal  
End

ALLPOINTS  
NOPRINT LOGFILE

eor

# =====  
# COSKF  
# =====

rm -f COSKF  
"\$ADFBIN/cpkf" TAPE21 COSKF COSMO

#!/bin/sh

# =====  
# The Molecule  
# =====

"\$ADFBIN/adf" <<eor

TITLE metalcomplex-VII

ATOMS

|      |                 |                 |                 |         |
|------|-----------------|-----------------|-----------------|---------|
| 1 Cr | -0.278775080000 | 0.100558910000  | 0.263361200000  | R=1.875 |
| 2 O  | -1.205685760000 | -0.366235990000 | 1.927830880000  | R=1.72  |
| 3 O  | 0.064054630000  | 1.941555830000  | 0.859981340000  | R=1.72  |
| 4 O  | 1.418575590000  | -0.573775630000 | 0.974685060000  | R=1.72  |
| 5 O  | 0.541790710000  | 0.497823640000  | -1.463239490000 | R=1.72  |
| 6 O  | -0.636253630000 | -1.736530860000 | -0.308321000000 | R=1.72  |
| 7 O  | -1.986450490000 | 0.794475830000  | -0.397807860000 | R=1.72  |



|      |                 |                 |                 |        |
|------|-----------------|-----------------|-----------------|--------|
| 8 C  | -0.569235010000 | 0.038689390000  | 3.105280680000  | R=2.00 |
| 9 C  | -0.527183950000 | 1.579996940000  | 3.196950080000  | R=2.00 |
| 10 H | -1.647535500000 | 4.982394960000  | 3.576285510000  | R=1.30 |
| 11 C | 0.527453470000  | 2.064323530000  | 2.179989980000  | R=2.00 |
| 12 C | -1.293778700000 | -0.598934410000 | 4.291596170000  | R=2.00 |
| 13 H | -1.256603300000 | -1.705245140000 | 4.198402570000  | R=1.30 |
| 14 H | -2.359894070000 | -0.295431180000 | 4.322398610000  | R=1.30 |
| 15 H | -0.794006030000 | -0.320509510000 | 5.242294770000  | R=1.30 |
| 16 C | 0.942760740000  | 3.518203190000  | 2.411856800000  | R=2.00 |
| 17 H | 1.765040930000  | 3.785468350000  | 1.715737190000  | R=1.30 |
| 18 H | 1.310776560000  | 3.659857450000  | 3.449796280000  | R=1.30 |
| 19 H | 0.100069430000  | 4.208898490000  | 2.212114510000  | R=1.30 |
| 20 C | 2.555870630000  | -0.438223290000 | 0.155023230000  | R=2.00 |
| 21 C | 2.721558460000  | 0.990554780000  | -0.421238460000 | R=2.00 |
| 22 H | -5.518468720000 | -0.704890430000 | -2.270013350000 | R=1.30 |
| 23 C | 1.621923100000  | 1.390254110000  | -1.462705840000 | R=2.00 |
| 24 C | 2.663080810000  | -1.570211900000 | -0.874275850000 | R=2.00 |
| 25 H | 2.017733270000  | -1.409554310000 | -1.752840070000 | R=1.30 |
| 26 H | -4.465260510000 | -1.448604980000 | -0.271909510000 | R=1.30 |
| 27 H | 3.709149560000  | -1.647795940000 | -1.239188050000 | R=1.30 |
| 28 C | 2.102195580000  | 1.468038060000  | -2.919482580000 | R=2.00 |
| 29 H | 1.239334410000  | 1.692746640000  | -3.582714030000 | R=1.30 |
| 30 H | 2.536789100000  | 0.499812740000  | -3.245432000000 | R=1.30 |
| 31 H | -3.776532490000 | -0.385584200000 | 0.971015400000  | R=1.30 |
| 32 C | -1.011289300000 | -1.917184940000 | -1.651937830000 | R=2.00 |
| 33 C | -2.096380250000 | -0.897878430000 | -2.116260620000 | R=2.00 |
| 34 C | -2.982033780000 | -1.318282940000 | -3.330625880000 | R=2.00 |
| 35 C | -2.835077320000 | -0.160532210000 | -0.978631160000 | R=2.00 |
| 36 C | -1.392386200000 | -3.392501560000 | -1.811543810000 | R=2.00 |
| 37 H | -0.533445300000 | -4.026409210000 | -1.503370080000 | R=1.30 |
| 38 H | -1.615658200000 | -3.644749920000 | -2.867155430000 | R=1.30 |
| 39 H | -2.247215210000 | -3.656547390000 | -1.157169130000 | R=1.30 |
| 40 C | -3.514207160000 | -1.023252900000 | 0.100212580000  | R=2.00 |
| 41 H | -2.883976980000 | -1.855806490000 | 0.461384990000  | R=1.30 |
| 42 H | 2.838678850000  | 2.280528000000  | -3.066335080000 | R=1.30 |
| 43 H | 2.390146350000  | -2.537739660000 | -0.402247200000 | R=1.30 |
| 44 C | -1.934471100000 | 2.243380470000  | 2.982958800000  | R=2.00 |
| 45 H | -2.692865450000 | 1.471805820000  | 2.729491150000  | R=1.30 |
| 46 H | -1.919665250000 | 2.909543700000  | 2.093816440000  | R=1.30 |
| 47 C | -2.697979070000 | 2.240077300000  | 5.418943960000  | R=2.00 |
| 48 H | -3.505976660000 | 3.418679770000  | 3.846145080000  | R=1.30 |
| 49 H | -1.027075460000 | 0.573781090000  | 9.232193860000  | R=1.30 |
| 50 C | -2.500292160000 | 3.065776750000  | 4.170784540000  | R=2.00 |
| 51 O | -1.611887340000 | 2.024569380000  | 6.269407610000  | R=1.72 |
| 52 H | 0.013297770000  | 0.535762260000  | 7.754239460000  | R=1.30 |
| 53 H | -0.318107400000 | 2.107329190000  | 8.589116420000  | R=1.30 |

|      |                 |                 |                 |        |
|------|-----------------|-----------------|-----------------|--------|
| 54 H | -2.396016390000 | 0.322465060000  | 7.185545080000  | R=1.30 |
| 55 C | -1.981457150000 | 1.324662620000  | 7.439485480000  | R=2.00 |
| 56 C | -0.749661700000 | 1.123239270000  | 8.307949850000  | R=2.00 |
| 57 H | -2.730681060000 | 1.906847500000  | 8.022892340000  | R=1.30 |
| 58 O | -3.817079360000 | 1.798853350000  | 5.660962310000  | R=1.72 |
| 59 C | 4.196844910000  | 1.244594260000  | -0.865906040000 | R=2.00 |
| 60 H | 4.376965920000  | 0.769261840000  | -1.852810590000 | R=1.30 |
| 61 H | 4.899608180000  | 0.722844020000  | -0.179623920000 | R=1.30 |
| 62 C | 4.590743310000  | 2.745205560000  | -0.886987210000 | R=2.00 |
| 63 H | 5.807806160000  | 2.679058520000  | 0.941945080000  | R=1.30 |
| 64 H | 3.733102950000  | 3.356887590000  | -1.239019860000 | R=1.30 |
| 65 C | 5.725825280000  | 2.958748320000  | -1.866178510000 | R=2.00 |
| 66 H | 6.260979340000  | 3.145431430000  | -5.081948730000 | R=1.30 |
| 67 C | 6.584592850000  | 2.886356100000  | -4.051780040000 | R=2.00 |
| 68 O | 5.432245400000  | 2.875909050000  | -3.229233980000 | R=1.72 |
| 69 H | 7.625582330000  | 1.220403870000  | -3.103116920000 | R=1.30 |
| 70 O | -4.077724900000 | -4.686578910000 | -3.637221970000 | R=1.72 |
| 71 O | 6.857040830000  | 3.195991550000  | -1.453191910000 | R=1.72 |
| 72 C | -4.183683710000 | -2.263984210000 | -3.044441150000 | R=2.00 |
| 73 C | -4.244435480000 | -3.370670790000 | -4.070413920000 | R=2.00 |
| 74 H | 7.320884300000  | 3.668284010000  | -3.757433690000 | R=1.30 |
| 75 H | -3.648233080000 | -7.709036920000 | -5.019555220000 | R=1.30 |
| 76 H | 0.457355230000  | -0.378768760000 | 3.140368670000  | R=1.30 |
| 77 H | -0.138739720000 | 1.833872800000  | 4.205950160000  | R=1.30 |
| 78 H | 1.453267580000  | 1.471710200000  | 2.317719510000  | R=1.30 |
| 79 H | 3.408447220000  | -0.602643280000 | 0.849844370000  | R=1.30 |
| 80 H | 2.577022190000  | 1.659823830000  | 0.441560550000  | R=1.30 |
| 81 H | -4.067779150000 | -2.741598040000 | -2.055677140000 | R=1.30 |
| 82 H | 1.243742910000  | 2.405409780000  | -1.216566440000 | R=1.30 |
| 83 H | -0.117949410000 | -1.779343260000 | -2.293683540000 | R=1.30 |
| 84 H | -1.500898240000 | -0.084324080000 | -2.586737280000 | R=1.30 |
| 85 H | -2.304458480000 | -1.769216680000 | -4.090107230000 | R=1.30 |
| 86 H | -3.359562010000 | -0.393865770000 | -3.823975950000 | R=1.30 |
| 87 H | -3.648727860000 | 0.429933070000  | -1.450534450000 | R=1.30 |
| 88 H | 6.488213670000  | 0.747860400000  | -4.427186820000 | R=1.30 |
| 89 H | 8.076112880000  | 1.513529040000  | -4.824626270000 | R=1.30 |
| 90 C | 7.233382520000  | 1.504473540000  | -4.101756480000 | R=2.00 |
| 91 H | -2.765690060000 | -6.998372690000 | -3.611153040000 | R=1.30 |
| 92 C | -3.989991300000 | -5.592473090000 | -4.717663950000 | R=2.00 |
| 93 H | -3.150844520000 | -5.316539270000 | -5.397145450000 | R=1.30 |
| 94 H | -4.946917040000 | -5.613957610000 | -5.286987740000 | R=1.30 |
| 95 C | -3.721113630000 | -6.988379470000 | -4.177726960000 | R=2.00 |
| 96 H | -4.547510300000 | -7.301710530000 | -3.505061690000 | R=1.30 |
| 97 O | -4.431951240000 | -3.085561640000 | -5.249846000000 | R=1.72 |
| 98 C | 4.954064930000  | 3.252945660000  | 0.521573000000  | R=2.00 |
| 99 H | 5.233188680000  | 4.327494940000  | 0.477126260000  | R=1.30 |

|       |                 |                 |                 |        |
|-------|-----------------|-----------------|-----------------|--------|
| 100 H | 4.093674710000  | 3.158174760000  | 1.213332650000  | R=1.30 |
| 101 C | -1.691890240000 | 4.331858670000  | 4.474418700000  | R=2.00 |
| 102 H | -2.186636500000 | 4.909879850000  | 5.284291210000  | R=1.30 |
| 103 H | -0.662523250000 | 4.085044290000  | 4.804480970000  | R=1.30 |
| 104 C | -5.521968220000 | -1.508142160000 | -3.032785280000 | R=2.00 |
| 105 H | -5.724244450000 | -1.046605060000 | -4.023356580000 | R=1.30 |
| 106 H | -6.351035760000 | -2.207240440000 | -2.790431930000 | R=1.30 |

END

#### GUIBONDS

1 1 2 1.0  
2 1 3 1.0  
3 1 4 1.0  
4 1 5 1.0  
5 1 6 1.0  
6 1 7 1.0  
7 2 8 1.0  
8 3 11 1.0  
9 4 20 1.0  
10 5 23 1.0  
11 6 32 1.0  
12 7 35 1.0  
13 8 9 1.0  
14 8 12 1.0  
15 55 51 1.0  
16 9 11 1.0  
17 11 16 1.0  
18 12 13 1.0  
19 12 14 1.0  
20 12 15 1.0  
21 16 17 1.0  
22 16 18 1.0  
23 16 19 1.0  
24 20 21 1.0  
25 20 24 1.0  
26 59 61 1.0  
27 21 23 1.0  
28 23 28 1.0  
29 24 25 1.0  
30 40 26 1.0  
31 24 27 1.0  
32 28 29 1.0  
33 28 30 1.0  
34 40 31 1.0  
35 32 33 1.0  
36 32 36 1.0

37 34 33 1.0  
38 33 35 1.0  
39 35 40 1.0  
40 36 37 1.0  
41 36 38 1.0  
42 36 39 1.0  
43 40 41 1.0  
44 42 28 1.0  
45 43 24 1.0  
46 10 101 1.0  
47 44 45 1.0  
48 44 46 1.0  
49 50 44 1.0  
50 50 48 1.0  
51 44 9 1.0  
52 50 47 1.0  
53 56 52 1.0  
54 56 49 1.0  
55 55 54 1.0  
56 51 47 1.0  
57 55 56 1.0  
58 56 53 1.0  
59 55 57 1.0  
60 58 47 2.0  
61 59 21 1.0  
62 59 60 1.0  
63 62 65 1.0  
64 63 98 1.0  
65 62 64 1.0  
66 62 59 1.0  
67 90 69 1.0  
68 68 65 1.0  
69 95 91 1.0  
70 67 90 1.0  
71 67 66 1.0  
72 71 65 2.0  
73 72 73 1.0  
74 72 34 1.0  
75 67 74 1.0  
76 92 70 1.0  
77 76 8 1.0  
78 77 9 1.0  
79 78 11 1.0  
80 79 20 1.0  
81 80 21 1.0  
82 22 104 1.0

83 82 23 1.0  
84 83 32 1.0  
85 84 33 1.0  
86 85 34 1.0  
87 86 34 1.0  
88 87 35 1.0  
89 90 89 1.0  
90 67 68 1.0  
91 70 73 1.0  
92 90 88 1.0  
93 92 95 1.0  
94 92 93 1.0  
95 92 94 1.0  
96 95 96 1.0  
97 95 75 1.0  
98 97 73 2.0  
99 81 72 1.0  
100 99 98 1.0  
101 100 98 1.0  
102 98 62 1.0  
103 102 101 1.0  
104 103 101 1.0  
105 101 50 1.0  
106 105 104 1.0  
107 106 104 1.0  
108 104 72 1.0  
END

SOLVATION

Surf Delley

Div ndiv=4

Solvent name=CRS cav0=0.0 cav1=0.0

Charged method=CONJ conv=1.0E-06 iter=300 corr

C-Mat EXACT

SCF VAR ALL

CSMRSP

END

CHARGE 0.0 2.0

UNRESTRICTED

BASIS

type TZP

core Small

createoutput None

END

XC

GGA Becke Perdew

END

RELATIVISTIC Scalar ZORA

GEOMETRY

branch New

iterations 100

END

SCF

iterations 50

mixing 0.2

diis

END

BeckeGrid

Quality Good

End

ZlmFit

Quality Normal

End

ALLPOINTS

NOPRINT LOGFILE

eor

# =====

# COSKF

# =====

rm -f COSKF

"\$ADFBIN/cpkf" TAPE21 COSKF COSMO

mv TAPE21 GASPHASE.t21

# COSMO-RS Solvent calculation

# =====

# The Molecule

# =====

"\$ADFBIN/adf" <<eor

TITLE metalcomplex-VII

ATOMS

|      |                 |                 |                 |         |
|------|-----------------|-----------------|-----------------|---------|
| 1 Cr | -0.278775080000 | 0.100558910000  | 0.263361200000  | R=1.875 |
| 2 O  | -1.205685760000 | -0.366235990000 | 1.927830880000  | R=1.72  |
| 3 O  | 0.064054630000  | 1.941555830000  | 0.859981340000  | R=1.72  |
| 4 O  | 1.418575590000  | -0.573775630000 | 0.974685060000  | R=1.72  |
| 5 O  | 0.541790710000  | 0.497823640000  | -1.463239490000 | R=1.72  |
| 6 O  | -0.636253630000 | -1.736530860000 | -0.308321000000 | R=1.72  |
| 7 O  | -1.986450490000 | 0.794475830000  | -0.397807860000 | R=1.72  |
| 8 C  | -0.569235010000 | 0.038689390000  | 3.105280680000  | R=2.00  |
| 9 C  | -0.527183950000 | 1.579996940000  | 3.196950080000  | R=2.00  |
| 10 H | -1.647535500000 | 4.982394960000  | 3.576285510000  | R=1.30  |
| 11 C | 0.527453470000  | 2.064323530000  | 2.179989980000  | R=2.00  |
| 12 C | -1.293778700000 | -0.598934410000 | 4.291596170000  | R=2.00  |
| 13 H | -1.256603300000 | -1.705245140000 | 4.198402570000  | R=1.30  |
| 14 H | -2.359894070000 | -0.295431180000 | 4.322398610000  | R=1.30  |
| 15 H | -0.794006030000 | -0.320509510000 | 5.242294770000  | R=1.30  |
| 16 C | 0.942760740000  | 3.518203190000  | 2.411856800000  | R=2.00  |
| 17 H | 1.765040930000  | 3.785468350000  | 1.715737190000  | R=1.30  |
| 18 H | 1.310776560000  | 3.659857450000  | 3.449796280000  | R=1.30  |
| 19 H | 0.100069430000  | 4.208898490000  | 2.212114510000  | R=1.30  |
| 20 C | 2.555870630000  | -0.438223290000 | 0.155023230000  | R=2.00  |
| 21 C | 2.721558460000  | 0.990554780000  | -0.421238460000 | R=2.00  |
| 22 H | -5.518468720000 | -0.704890430000 | -2.270013350000 | R=1.30  |
| 23 C | 1.621923100000  | 1.390254110000  | -1.462705840000 | R=2.00  |
| 24 C | 2.663080810000  | -1.570211900000 | -0.874275850000 | R=2.00  |
| 25 H | 2.017733270000  | -1.409554310000 | -1.752840070000 | R=1.30  |
| 26 H | -4.465260510000 | -1.448604980000 | -0.271909510000 | R=1.30  |
| 27 H | 3.709149560000  | -1.647795940000 | -1.239188050000 | R=1.30  |
| 28 C | 2.102195580000  | 1.468038060000  | -2.919482580000 | R=2.00  |
| 29 H | 1.239334410000  | 1.692746640000  | -3.582714030000 | R=1.30  |
| 30 H | 2.536789100000  | 0.499812740000  | -3.245432000000 | R=1.30  |

|      |                 |                 |                 |        |
|------|-----------------|-----------------|-----------------|--------|
| 31 H | -3.776532490000 | -0.385584200000 | 0.971015400000  | R=1.30 |
| 32 C | -1.011289300000 | -1.917184940000 | -1.651937830000 | R=2.00 |
| 33 C | -2.096380250000 | -0.897878430000 | -2.116260620000 | R=2.00 |
| 34 C | -2.982033780000 | -1.318282940000 | -3.330625880000 | R=2.00 |
| 35 C | -2.835077320000 | -0.160532210000 | -0.978631160000 | R=2.00 |
| 36 C | -1.392386200000 | -3.392501560000 | -1.811543810000 | R=2.00 |
| 37 H | -0.533445300000 | -4.026409210000 | -1.503370080000 | R=1.30 |
| 38 H | -1.615658200000 | -3.644749920000 | -2.867155430000 | R=1.30 |
| 39 H | -2.247215210000 | -3.656547390000 | -1.157169130000 | R=1.30 |
| 40 C | -3.514207160000 | -1.023252900000 | 0.100212580000  | R=2.00 |
| 41 H | -2.883976980000 | -1.855806490000 | 0.461384990000  | R=1.30 |
| 42 H | 2.838678850000  | 2.280528000000  | -3.066335080000 | R=1.30 |
| 43 H | 2.390146350000  | -2.537739660000 | -0.402247200000 | R=1.30 |
| 44 C | -1.934471100000 | 2.243380470000  | 2.982958800000  | R=2.00 |
| 45 H | -2.692865450000 | 1.471805820000  | 2.729491150000  | R=1.30 |
| 46 H | -1.919665250000 | 2.909543700000  | 2.093816440000  | R=1.30 |
| 47 C | -2.697979070000 | 2.240077300000  | 5.418943960000  | R=2.00 |
| 48 H | -3.505976660000 | 3.418679770000  | 3.846145080000  | R=1.30 |
| 49 H | -1.027075460000 | 0.573781090000  | 9.232193860000  | R=1.30 |
| 50 C | -2.500292160000 | 3.065776750000  | 4.170784540000  | R=2.00 |
| 51 O | -1.611887340000 | 2.024569380000  | 6.269407610000  | R=1.72 |
| 52 H | 0.013297770000  | 0.535762260000  | 7.754239460000  | R=1.30 |
| 53 H | -0.318107400000 | 2.107329190000  | 8.589116420000  | R=1.30 |
| 54 H | -2.396016390000 | 0.322465060000  | 7.185545080000  | R=1.30 |
| 55 C | -1.981457150000 | 1.324662620000  | 7.439485480000  | R=2.00 |
| 56 C | -0.749661700000 | 1.123239270000  | 8.307949850000  | R=2.00 |
| 57 H | -2.730681060000 | 1.906847500000  | 8.022892340000  | R=1.30 |
| 58 O | -3.817079360000 | 1.798853350000  | 5.660962310000  | R=1.72 |
| 59 C | 4.196844910000  | 1.244594260000  | -0.865906040000 | R=2.00 |
| 60 H | 4.376965920000  | 0.769261840000  | -1.852810590000 | R=1.30 |
| 61 H | 4.899608180000  | 0.722844020000  | -0.179623920000 | R=1.30 |
| 62 C | 4.590743310000  | 2.745205560000  | -0.886987210000 | R=2.00 |
| 63 H | 5.807806160000  | 2.679058520000  | 0.941945080000  | R=1.30 |
| 64 H | 3.733102950000  | 3.356887590000  | -1.239019860000 | R=1.30 |
| 65 C | 5.725825280000  | 2.958748320000  | -1.866178510000 | R=2.00 |
| 66 H | 6.260979340000  | 3.145431430000  | -5.081948730000 | R=1.30 |
| 67 C | 6.584592850000  | 2.886356100000  | -4.051780040000 | R=2.00 |
| 68 O | 5.432245400000  | 2.875909050000  | -3.229233980000 | R=1.72 |
| 69 H | 7.625582330000  | 1.220403870000  | -3.103116920000 | R=1.30 |
| 70 O | -4.077724900000 | -4.686578910000 | -3.637221970000 | R=1.72 |
| 71 O | 6.857040830000  | 3.195991550000  | -1.453191910000 | R=1.72 |
| 72 C | -4.183683710000 | -2.263984210000 | -3.044441150000 | R=2.00 |
| 73 C | -4.244435480000 | -3.370670790000 | -4.070413920000 | R=2.00 |
| 74 H | 7.320884300000  | 3.668284010000  | -3.757433690000 | R=1.30 |
| 75 H | -3.648233080000 | -7.709036920000 | -5.019555220000 | R=1.30 |
| 76 H | 0.457355230000  | -0.378768760000 | 3.140368670000  | R=1.30 |



|       |                 |                 |                 |        |
|-------|-----------------|-----------------|-----------------|--------|
| 77 H  | -0.138739720000 | 1.833872800000  | 4.205950160000  | R=1.30 |
| 78 H  | 1.453267580000  | 1.471710200000  | 2.317719510000  | R=1.30 |
| 79 H  | 3.408447220000  | -0.602643280000 | 0.849844370000  | R=1.30 |
| 80 H  | 2.577022190000  | 1.659823830000  | 0.441560550000  | R=1.30 |
| 81 H  | -4.067779150000 | -2.741598040000 | -2.055677140000 | R=1.30 |
| 82 H  | 1.243742910000  | 2.405409780000  | -1.216566440000 | R=1.30 |
| 83 H  | -0.117949410000 | -1.779343260000 | -2.293683540000 | R=1.30 |
| 84 H  | -1.500898240000 | -0.084324080000 | -2.586737280000 | R=1.30 |
| 85 H  | -2.304458480000 | -1.769216680000 | -4.090107230000 | R=1.30 |
| 86 H  | -3.359562010000 | -0.393865770000 | -3.823975950000 | R=1.30 |
| 87 H  | -3.648727860000 | 0.429933070000  | -1.450534450000 | R=1.30 |
| 88 H  | 6.488213670000  | 0.747860400000  | -4.427186820000 | R=1.30 |
| 89 H  | 8.076112880000  | 1.513529040000  | -4.824626270000 | R=1.30 |
| 90 C  | 7.233382520000  | 1.504473540000  | -4.101756480000 | R=2.00 |
| 91 H  | -2.765690060000 | -6.998372690000 | -3.611153040000 | R=1.30 |
| 92 C  | -3.989991300000 | -5.592473090000 | -4.717663950000 | R=2.00 |
| 93 H  | -3.150844520000 | -5.316539270000 | -5.397145450000 | R=1.30 |
| 94 H  | -4.946917040000 | -5.613957610000 | -5.286987740000 | R=1.30 |
| 95 C  | -3.721113630000 | -6.988379470000 | -4.177726960000 | R=2.00 |
| 96 H  | -4.547510300000 | -7.301710530000 | -3.505061690000 | R=1.30 |
| 97 O  | -4.431951240000 | -3.085561640000 | -5.249846000000 | R=1.72 |
| 98 C  | 4.954064930000  | 3.252945660000  | 0.521573000000  | R=2.00 |
| 99 H  | 5.233188680000  | 4.327494940000  | 0.477126260000  | R=1.30 |
| 100 H | 4.093674710000  | 3.158174760000  | 1.213332650000  | R=1.30 |
| 101 C | -1.691890240000 | 4.331858670000  | 4.474418700000  | R=2.00 |
| 102 H | -2.186636500000 | 4.909879850000  | 5.284291210000  | R=1.30 |
| 103 H | -0.662523250000 | 4.085044290000  | 4.804480970000  | R=1.30 |
| 104 C | -5.521968220000 | -1.508142160000 | -3.032785280000 | R=2.00 |
| 105 H | -5.724244450000 | -1.046605060000 | -4.023356580000 | R=1.30 |
| 106 H | -6.351035760000 | -2.207240440000 | -2.790431930000 | R=1.30 |

END

#### GUIBONDS

1 1 2 1.0  
2 1 3 1.0  
3 1 4 1.0  
4 1 5 1.0  
5 1 6 1.0  
6 1 7 1.0  
7 2 8 1.0  
8 3 11 1.0  
9 4 20 1.0  
10 5 23 1.0  
11 6 32 1.0  
12 7 35 1.0  
13 8 9 1.0

14 8 12 1.0  
15 55 51 1.0  
16 9 11 1.0  
17 11 16 1.0  
18 12 13 1.0  
19 12 14 1.0  
20 12 15 1.0  
21 16 17 1.0  
22 16 18 1.0  
23 16 19 1.0  
24 20 21 1.0  
25 20 24 1.0  
26 59 61 1.0  
27 21 23 1.0  
28 23 28 1.0  
29 24 25 1.0  
30 40 26 1.0  
31 24 27 1.0  
32 28 29 1.0  
33 28 30 1.0  
34 40 31 1.0  
35 32 33 1.0  
36 32 36 1.0  
37 34 33 1.0  
38 33 35 1.0  
39 35 40 1.0  
40 36 37 1.0  
41 36 38 1.0  
42 36 39 1.0  
43 40 41 1.0  
44 42 28 1.0  
45 43 24 1.0  
46 10 101 1.0  
47 44 45 1.0  
48 44 46 1.0  
49 50 44 1.0  
50 50 48 1.0  
51 44 9 1.0  
52 50 47 1.0  
53 56 52 1.0  
54 56 49 1.0  
55 55 54 1.0  
56 51 47 1.0  
57 55 56 1.0  
58 56 53 1.0  
59 55 57 1.0

60 58 47 2.0  
61 59 21 1.0  
62 59 60 1.0  
63 62 65 1.0  
64 63 98 1.0  
65 62 64 1.0  
66 62 59 1.0  
67 90 69 1.0  
68 68 65 1.0  
69 95 91 1.0  
70 67 90 1.0  
71 67 66 1.0  
72 71 65 2.0  
73 72 73 1.0  
74 72 34 1.0  
75 67 74 1.0  
76 92 70 1.0  
77 76 8 1.0  
78 77 9 1.0  
79 78 11 1.0  
80 79 20 1.0  
81 80 21 1.0  
82 22 104 1.0  
83 82 23 1.0  
84 83 32 1.0  
85 84 33 1.0  
86 85 34 1.0  
87 86 34 1.0  
88 87 35 1.0  
89 90 89 1.0  
90 67 68 1.0  
91 70 73 1.0  
92 90 88 1.0  
93 92 95 1.0  
94 92 93 1.0  
95 92 94 1.0  
96 95 96 1.0  
97 95 75 1.0  
98 97 73 2.0  
99 81 72 1.0  
100 99 98 1.0  
101 100 98 1.0  
102 98 62 1.0  
103 102 101 1.0  
104 103 101 1.0  
105 101 50 1.0

106 105 104 1.0  
107 106 104 1.0  
108 104 72 1.0  
END

SOLVATION

Surf Delley  
Div ndiv=4  
Solvent name=CRS cav0=0.0 cav1=0.0  
Charged method=CONJ conv=1.0E-06 iter=300 corr  
C-Mat EXACT  
SCF VAR ALL  
CSMRSP

END

CHARGE 0.0 2.0

UNRESTRICTED

BASIS

type TZP  
core Small  
createoutput None  
END

XC

GGA Becke Perdew  
END

RELATIVISTIC Scalar ZORA

RESTART GASPHASE.t21

SCF

iterations 50  
mixing 0.2  
diis  
END

BeckeGrid

Quality Good  
End

ZlmFit  
Quality Normal  
End

ALLPOINTS  
NOPRINT LOGFILE

eor

# =====  
# COSKF  
# =====

rm -f COSKF  
"\$ADFBIN/cpkf" TAPE21 COSKF COSMO

#!/bin/sh

# =====  
# The Molecule  
# =====

"\$ADFBIN/adf" <<eor

TITLE metalcomplex-VIII

ATOMS

|      |                 |                 |                 |         |
|------|-----------------|-----------------|-----------------|---------|
| 1 Cr | -0.384795260000 | -0.045905740000 | 0.244362340000  | R=1.875 |
| 2 O  | -1.313780350000 | -0.603588010000 | 1.882238260000  | R=1.72  |
| 3 O  | -0.157532260000 | 1.802686400000  | 0.879424840000  | R=1.72  |
| 4 O  | 1.341088240000  | -0.630231980000 | 0.972654570000  | R=1.72  |
| 5 O  | 0.438246900000  | 0.428649610000  | -1.461534210000 | R=1.72  |
| 6 O  | -0.618402790000 | -1.891598430000 | -0.368074770000 | R=1.72  |
| 7 O  | -2.123558260000 | 0.560353410000  | -0.428343110000 | R=1.72  |
| 8 C  | -0.721442810000 | -0.185345150000 | 3.075489880000  | R=2.00  |
| 9 C  | -0.781133380000 | 1.346780810000  | 3.189156650000  | R=2.00  |
| 10 H | -1.876430900000 | 3.664930770000  | 4.238816310000  | R=1.30  |
| 11 C | 0.255645300000  | 1.933841540000  | 2.216844910000  | R=2.00  |
| 12 C | -1.424423820000 | -0.876480540000 | 4.248819750000  | R=2.00  |
| 13 H | -1.324558110000 | -1.977940380000 | 4.145842510000  | R=1.30  |
| 14 H | -2.505375310000 | -0.630535590000 | 4.281521780000  | R=1.30  |
| 15 H | -0.954507340000 | -0.576841600000 | 5.208864990000  | R=1.30  |
| 16 C | 0.525418530000  | 3.414443910000  | 2.498914860000  | R=2.00  |
| 17 H | 1.345574270000  | 3.775391070000  | 1.842157190000  | R=1.30  |

|      |                 |                 |                 |        |
|------|-----------------|-----------------|-----------------|--------|
| 18 H | 0.836164230000  | 3.560406360000  | 3.555427970000  | R=1.30 |
| 19 H | -0.376615920000 | 4.028105170000  | 2.294160170000  | R=1.30 |
| 20 C | 2.485137190000  | -0.382092160000 | 0.188308500000  | R=2.00 |
| 21 C | 2.543323010000  | 1.067608350000  | -0.355144390000 | R=2.00 |
| 22 H | -4.951220480000 | -1.682001000000 | -2.714056270000 | R=1.30 |
| 23 C | 1.460449530000  | 1.385938360000  | -1.437479370000 | R=2.00 |
| 24 C | 2.707354920000  | -1.478138470000 | -0.860355960000 | R=2.00 |
| 25 H | 1.988753030000  | -1.420162090000 | -1.693719720000 | R=1.30 |
| 26 H | -4.360602570000 | -1.959785960000 | -0.484094860000 | R=1.30 |
| 27 H | 3.730248680000  | -1.394128350000 | -1.284265950000 | R=1.30 |
| 28 C | 1.992147210000  | 1.466767740000  | -2.877530890000 | R=2.00 |
| 29 H | 1.144003670000  | 1.624785270000  | -3.577913320000 | R=1.30 |
| 30 H | 2.498451550000  | 0.520952890000  | -3.163650790000 | R=1.30 |
| 31 H | -4.014634550000 | -0.748492250000 | 0.777163880000  | R=1.30 |
| 32 C | -0.992532140000 | -2.087950920000 | -1.711118040000 | R=2.00 |
| 33 C | -2.083686250000 | -1.085661330000 | -2.190140890000 | R=2.00 |
| 34 C | -2.909014230000 | -1.507390540000 | -3.443433240000 | R=2.00 |
| 35 C | -2.897766850000 | -0.424680350000 | -1.059450070000 | R=2.00 |
| 36 C | -1.377794990000 | -3.565627970000 | -1.848061370000 | R=2.00 |
| 37 H | -0.525055800000 | -4.197773530000 | -1.519824400000 | R=1.30 |
| 38 H | -1.598780740000 | -3.841677490000 | -2.898983680000 | R=1.30 |
| 39 H | -2.242082380000 | -3.808925810000 | -1.197131840000 | R=1.30 |
| 40 C | -3.551947530000 | -1.359888940000 | -0.026583360000 | R=2.00 |
| 41 H | -2.841205270000 | -2.058599400000 | 0.448408830000  | R=1.30 |
| 42 H | 2.687410830000  | 2.317386290000  | -3.017461760000 | R=1.30 |
| 43 H | 2.612176640000  | -2.476853580000 | -0.384004330000 | R=1.30 |
| 44 C | -2.218760040000 | 1.921838080000  | 2.958318360000  | R=2.00 |
| 45 H | -2.978157430000 | 1.114973790000  | 2.878067510000  | R=1.30 |
| 46 H | -2.275721130000 | 2.458430600000  | 1.987437610000  | R=1.30 |
| 47 C | -2.978845850000 | 2.185255160000  | 5.337907990000  | R=2.00 |
| 48 H | -3.570760410000 | 3.439791130000  | 3.710787450000  | R=1.30 |
| 49 H | -1.611775220000 | -7.482183890000 | -6.403106020000 | R=1.30 |
| 50 C | -2.661643300000 | 2.900845950000  | 4.056757010000  | R=2.00 |
| 51 O | -1.969009660000 | 2.043423780000  | 6.289336050000  | R=1.72 |
| 52 H | -2.348816080000 | -0.522001740000 | 9.307591670000  | R=1.30 |
| 53 H | -4.051092950000 | -5.474380190000 | -8.064287120000 | R=1.30 |
| 54 H | -2.686634570000 | 0.226763880000  | 7.014691070000  | R=1.30 |
| 55 C | -2.371702380000 | 1.233857660000  | 7.375196950000  | R=2.00 |
| 56 H | 1.501744130000  | -0.399564130000 | 8.654679770000  | R=1.30 |
| 57 H | -3.212514890000 | 1.717360090000  | 7.923802660000  | R=1.30 |
| 58 O | -4.110908330000 | 1.743525100000  | 5.505808970000  | R=1.72 |
| 59 C | 3.998657220000  | 1.475975330000  | -0.729214640000 | R=2.00 |
| 60 H | 4.287831270000  | 1.055869450000  | -1.715089940000 | R=1.30 |
| 61 H | 4.713425490000  | 1.039579350000  | 0.002773820000  | R=1.30 |
| 62 C | 4.205998360000  | 3.000355840000  | -0.688741080000 | R=2.00 |
| 63 H | 4.159410260000  | 3.345550170000  | 0.368095420000  | R=1.30 |

|       |                 |                 |                 |        |
|-------|-----------------|-----------------|-----------------|--------|
| 64 H  | 3.407897250000  | 3.533140630000  | -1.244306380000 | R=1.30 |
| 65 C  | 5.532035380000  | 3.362880940000  | -1.287520440000 | R=2.00 |
| 66 H  | 7.089848740000  | 3.371080480000  | -4.155274380000 | R=1.30 |
| 67 C  | 7.070412840000  | 3.233664480000  | -3.052682420000 | R=2.00 |
| 68 O  | 5.711582620000  | 3.172744080000  | -2.658438330000 | R=1.72 |
| 69 O  | -5.813755920000 | -2.529394740000 | -4.865219370000 | R=1.72 |
| 70 O  | -3.940597920000 | -3.835004370000 | -5.142402040000 | R=1.72 |
| 71 O  | 6.403733790000  | 3.834814240000  | -0.566222240000 | R=1.72 |
| 72 C  | -4.179266770000 | -2.332740270000 | -3.178700100000 | R=2.00 |
| 73 C  | -4.713770840000 | -2.894345320000 | -4.463439880000 | R=2.00 |
| 74 H  | 7.597544050000  | 4.118252520000  | -2.627439840000 | R=1.30 |
| 75 H  | 0.229390790000  | -1.542023770000 | 8.077981480000  | R=1.30 |
| 76 H  | 0.328907930000  | -0.537427920000 | 3.119419790000  | R=1.30 |
| 77 H  | -0.434864190000 | 1.599064690000  | 4.216423340000  | R=1.30 |
| 78 H  | 1.222351140000  | 1.415123730000  | 2.374281860000  | R=1.30 |
| 79 H  | 3.332683990000  | -0.491189390000 | 0.899712950000  | R=1.30 |
| 80 H  | 2.312802860000  | 1.708963910000  | 0.511923320000  | R=1.30 |
| 81 H  | -3.981476820000 | -3.179439230000 | -2.496766260000 | R=1.30 |
| 82 H  | 1.011294340000  | 2.378410740000  | -1.218385230000 | R=1.30 |
| 83 H  | -0.098177480000 | -1.950929820000 | -2.353095570000 | R=1.30 |
| 84 H  | -1.502045330000 | -0.240826910000 | -2.616284850000 | R=1.30 |
| 85 H  | -2.237593320000 | -2.040477900000 | -4.151645350000 | R=1.30 |
| 86 H  | -3.230307680000 | -0.584720210000 | -3.978538840000 | R=1.30 |
| 87 H  | -3.736169850000 | 0.124492510000  | -1.540841090000 | R=1.30 |
| 88 O  | -0.112790790000 | 0.445564840000  | 7.676224320000  | R=1.72 |
| 89 H  | 0.314372290000  | 0.153651920000  | 10.583205570000 | R=1.30 |
| 90 H  | 9.915816020000  | 1.456716020000  | -2.509593220000 | R=1.30 |
| 91 H  | 10.075857630000 | 0.469322520000  | -4.629022380000 | R=1.30 |
| 92 C  | -4.496088910000 | -4.179915820000 | -6.395669620000 | R=2.00 |
| 93 H  | -4.651213580000 | -3.274182730000 | -7.027078820000 | R=1.30 |
| 94 H  | -5.470646170000 | -4.699595770000 | -6.251872000000 | R=1.30 |
| 95 O  | 7.097694340000  | 0.834090410000  | -3.272243190000 | R=1.72 |
| 96 H  | 7.836546990000  | 1.800052020000  | -1.610358900000 | R=1.30 |
| 97 C  | 7.964924860000  | 0.161200190000  | -4.154693960000 | R=2.00 |
| 98 C  | 9.144233320000  | 1.054079250000  | -4.467494600000 | R=2.00 |
| 99 C  | 9.232723910000  | 1.924236870000  | -3.253522320000 | R=2.00 |
| 100 C | 7.804851960000  | 1.922930290000  | -2.714811700000 | R=2.00 |
| 101 H | 9.612559070000  | 2.939120420000  | -3.505318720000 | R=1.30 |
| 102 H | 7.421021860000  | -0.102860560000 | -5.086449560000 | R=1.30 |
| 103 H | 8.316047570000  | -0.775978660000 | -3.670023170000 | R=1.30 |
| 104 H | 8.923548050000  | 1.674285210000  | -5.364486530000 | R=1.30 |
| 105 C | -3.547652570000 | -5.130635640000 | -7.133187400000 | R=2.00 |
| 106 C | -2.230826100000 | -4.459100940000 | -7.512155030000 | R=2.00 |
| 107 C | -1.228717550000 | -5.550753550000 | -7.308227130000 | R=2.00 |
| 108 C | -1.884426320000 | -6.415789560000 | -6.254233220000 | R=2.00 |
| 109 O | -3.283009640000 | -6.265524120000 | -6.335511810000 | R=1.72 |

|       |                 |                 |                 |        |
|-------|-----------------|-----------------|-----------------|--------|
| 110 H | -2.238306590000 | -4.103661450000 | -8.565733750000 | R=1.30 |
| 111 H | -1.991014480000 | -3.607372550000 | -6.836624490000 | R=1.30 |
| 112 H | -0.246733030000 | -5.155809650000 | -6.967837770000 | R=1.30 |
| 113 H | -1.100286340000 | -6.130504970000 | -8.249224640000 | R=1.30 |
| 114 H | -1.547619440000 | -6.100213640000 | -5.242355660000 | R=1.30 |
| 115 H | -0.463589110000 | -1.471468010000 | 10.317070550000 | R=1.30 |
| 116 C | -1.194070390000 | 1.065237990000  | 8.337804360000  | R=2.00 |
| 117 C | 0.406780280000  | -0.544405030000 | 8.535314800000  | R=2.00 |
| 118 C | -0.287546130000 | -0.464311930000 | 9.880220800000  | R=2.00 |
| 119 C | -1.569646260000 | 0.233915250000  | 9.555242570000  | R=2.00 |
| 120 H | -1.917665220000 | 0.869648520000  | 10.398549800000 | R=1.30 |
| 121 H | -0.863856880000 | 2.072719980000  | 8.678242800000  | R=1.30 |

END

#### GUIBONDS

1 1 2 1.0  
2 1 3 1.0  
3 1 4 1.0  
4 1 5 1.0  
5 1 6 1.0  
6 1 7 1.0  
7 2 8 1.0  
8 3 11 1.0  
9 4 20 1.0  
10 5 23 1.0  
11 6 32 1.0  
12 7 35 1.0  
13 8 9 1.0  
14 8 12 1.0  
15 55 51 1.0  
16 9 11 1.0  
17 11 16 1.0  
18 12 13 1.0  
19 12 14 1.0  
20 12 15 1.0  
21 16 17 1.0  
22 16 18 1.0  
23 16 19 1.0  
24 20 21 1.0  
25 20 24 1.0  
26 59 61 1.0  
27 21 23 1.0  
28 23 28 1.0  
29 24 25 1.0  
30 40 26 1.0  
31 24 27 1.0



32 28 29 1.0  
33 28 30 1.0  
34 40 31 1.0  
35 32 33 1.0  
36 32 36 1.0  
37 34 33 1.0  
38 33 35 1.0  
39 35 40 1.0  
40 36 37 1.0  
41 36 38 1.0  
42 36 39 1.0  
43 40 41 1.0  
44 42 28 1.0  
45 43 24 1.0  
46 50 10 1.0  
47 44 45 1.0  
48 44 46 1.0  
49 50 44 1.0  
50 50 48 1.0  
51 44 9 1.0  
52 50 47 1.0  
53 105 92 1.0  
54 75 117 1.0  
55 55 54 1.0  
56 51 47 1.0  
57 120 119 1.0  
58 53 105 1.0  
59 55 57 1.0  
60 58 47 2.0  
61 59 21 1.0  
62 59 60 1.0  
63 62 65 1.0  
64 62 63 1.0  
65 62 64 1.0  
66 62 59 1.0  
67 81 72 1.0  
68 68 65 1.0  
69 95 97 1.0  
70 90 99 1.0  
71 67 66 1.0  
72 71 65 2.0  
73 72 73 1.0  
74 72 34 1.0  
75 67 74 1.0  
76 92 70 1.0  
77 76 8 1.0

78 77 9 1.0  
79 78 11 1.0  
80 79 20 1.0  
81 80 21 1.0  
82 22 72 1.0  
83 82 23 1.0  
84 83 32 1.0  
85 84 33 1.0  
86 85 34 1.0  
87 86 34 1.0  
88 87 35 1.0  
89 69 73 2.0  
90 67 68 1.0  
91 70 73 1.0  
92 116 119 1.0  
93 88 116 1.0  
94 92 93 1.0  
95 92 94 1.0  
96 117 88 1.0  
97 101 99 1.0  
98 97 98 1.0  
99 98 99 1.0  
100 96 100 1.0  
101 100 67 1.0  
102 100 95 1.0  
103 100 99 1.0  
104 102 97 1.0  
105 103 97 1.0  
106 104 98 1.0  
107 91 98 1.0  
108 106 107 1.0  
109 107 108 1.0  
110 108 109 1.0  
111 109 105 1.0  
112 105 106 1.0  
113 110 106 1.0  
114 111 106 1.0  
115 112 107 1.0  
116 113 107 1.0  
117 114 108 1.0  
118 49 108 1.0  
119 56 117 1.0  
120 117 118 1.0  
121 118 119 1.0  
122 89 118 1.0  
123 115 118 1.0

124 52 119 1.0  
125 116 55 1.0  
126 121 116 1.0  
END

SOLVATION

Surf Delley  
Div ndiv=4  
Solvent name=CRS cav0=0.0 cav1=0.0  
Charged method=CONJ conv=1.0E-06 iter=300 corr  
C-Mat EXACT  
SCF VAR ALL  
CSMRSP  
END

CHARGE 0.0 2.0

UNRESTRICTED

BASIS

type TZP  
core Small  
createoutput None  
END

XC

GGA Becke Perdew  
END

RELATIVISTIC Scalar ZORA

GEOMETRY

branch New  
iterations 100  
END

SCF

iterations 50  
mixing 0.2  
diis  
END

BeckeGrid

Quality Good

End

ZlmFit

Quality Normal

End

ALLPOINTS

NOPRINT LOGFILE

eor

# =====

# COSKF

# =====

rm -f COSKF

"\$ADFBIN/cpkf" TAPE21 COSKF COSMO

mv TAPE21 GASPHASE.t21

# COSMO-RS Solvent calculation

# =====

# The Molecule

# =====

"\$ADFBIN/adf" <<eor

TITLE metalcomplex-VIII

ATOMS

|      |                 |                 |                 |         |
|------|-----------------|-----------------|-----------------|---------|
| 1 Cr | -0.384795260000 | -0.045905740000 | 0.244362340000  | R=1.875 |
| 2 O  | -1.313780350000 | -0.603588010000 | 1.882238260000  | R=1.72  |
| 3 O  | -0.157532260000 | 1.802686400000  | 0.879424840000  | R=1.72  |
| 4 O  | 1.341088240000  | -0.630231980000 | 0.972654570000  | R=1.72  |
| 5 O  | 0.438246900000  | 0.428649610000  | -1.461534210000 | R=1.72  |
| 6 O  | -0.618402790000 | -1.891598430000 | -0.368074770000 | R=1.72  |
| 7 O  | -2.123558260000 | 0.560353410000  | -0.428343110000 | R=1.72  |

|      |                 |                 |                 |        |
|------|-----------------|-----------------|-----------------|--------|
| 8 C  | -0.721442810000 | -0.185345150000 | 3.075489880000  | R=2.00 |
| 9 C  | -0.781133380000 | 1.346780810000  | 3.189156650000  | R=2.00 |
| 10 H | -1.876430900000 | 3.664930770000  | 4.238816310000  | R=1.30 |
| 11 C | 0.255645300000  | 1.933841540000  | 2.216844910000  | R=2.00 |
| 12 C | -1.424423820000 | -0.876480540000 | 4.248819750000  | R=2.00 |
| 13 H | -1.324558110000 | -1.977940380000 | 4.145842510000  | R=1.30 |
| 14 H | -2.505375310000 | -0.630535590000 | 4.281521780000  | R=1.30 |
| 15 H | -0.954507340000 | -0.576841600000 | 5.208864990000  | R=1.30 |
| 16 C | 0.525418530000  | 3.414443910000  | 2.498914860000  | R=2.00 |
| 17 H | 1.345574270000  | 3.775391070000  | 1.842157190000  | R=1.30 |
| 18 H | 0.836164230000  | 3.560406360000  | 3.555427970000  | R=1.30 |
| 19 H | -0.376615920000 | 4.028105170000  | 2.294160170000  | R=1.30 |
| 20 C | 2.485137190000  | -0.382092160000 | 0.188308500000  | R=2.00 |
| 21 C | 2.543323010000  | 1.067608350000  | -0.355144390000 | R=2.00 |
| 22 H | -4.951220480000 | -1.682001000000 | -2.714056270000 | R=1.30 |
| 23 C | 1.460449530000  | 1.385938360000  | -1.437479370000 | R=2.00 |
| 24 C | 2.707354920000  | -1.478138470000 | -0.860355960000 | R=2.00 |
| 25 H | 1.988753030000  | -1.420162090000 | -1.693719720000 | R=1.30 |
| 26 H | -4.360602570000 | -1.959785960000 | -0.484094860000 | R=1.30 |
| 27 H | 3.730248680000  | -1.394128350000 | -1.284265950000 | R=1.30 |
| 28 C | 1.992147210000  | 1.466767740000  | -2.877530890000 | R=2.00 |
| 29 H | 1.144003670000  | 1.624785270000  | -3.577913320000 | R=1.30 |
| 30 H | 2.498451550000  | 0.520952890000  | -3.163650790000 | R=1.30 |
| 31 H | -4.014634550000 | -0.748492250000 | 0.777163880000  | R=1.30 |
| 32 C | -0.992532140000 | -2.087950920000 | -1.711118040000 | R=2.00 |
| 33 C | -2.083686250000 | -1.085661330000 | -2.190140890000 | R=2.00 |
| 34 C | -2.909014230000 | -1.507390540000 | -3.443433240000 | R=2.00 |
| 35 C | -2.897766850000 | -0.424680350000 | -1.059450070000 | R=2.00 |
| 36 C | -1.377794990000 | -3.565627970000 | -1.848061370000 | R=2.00 |
| 37 H | -0.525055800000 | -4.197773530000 | -1.519824400000 | R=1.30 |
| 38 H | -1.598780740000 | -3.841677490000 | -2.898983680000 | R=1.30 |
| 39 H | -2.242082380000 | -3.808925810000 | -1.197131840000 | R=1.30 |
| 40 C | -3.551947530000 | -1.359888940000 | -0.026583360000 | R=2.00 |
| 41 H | -2.841205270000 | -2.058599400000 | 0.448408830000  | R=1.30 |
| 42 H | 2.687410830000  | 2.317386290000  | -3.017461760000 | R=1.30 |
| 43 H | 2.612176640000  | -2.476853580000 | -0.384004330000 | R=1.30 |
| 44 C | -2.218760040000 | 1.921838080000  | 2.958318360000  | R=2.00 |
| 45 H | -2.978157430000 | 1.114973790000  | 2.878067510000  | R=1.30 |
| 46 H | -2.275721130000 | 2.458430600000  | 1.987437610000  | R=1.30 |
| 47 C | -2.978845850000 | 2.185255160000  | 5.337907990000  | R=2.00 |
| 48 H | -3.570760410000 | 3.439791130000  | 3.710787450000  | R=1.30 |
| 49 H | -1.611775220000 | -7.482183890000 | -6.403106020000 | R=1.30 |
| 50 C | -2.661643300000 | 2.900845950000  | 4.056757010000  | R=2.00 |
| 51 O | -1.969009660000 | 2.043423780000  | 6.289336050000  | R=1.72 |
| 52 H | -2.348816080000 | -0.522001740000 | 9.307591670000  | R=1.30 |
| 53 H | -4.051092950000 | -5.474380190000 | -8.064287120000 | R=1.30 |

|      |                 |                 |                 |        |
|------|-----------------|-----------------|-----------------|--------|
| 54 H | -2.686634570000 | 0.226763880000  | 7.014691070000  | R=1.30 |
| 55 C | -2.371702380000 | 1.233857660000  | 7.375196950000  | R=2.00 |
| 56 H | 1.501744130000  | -0.399564130000 | 8.654679770000  | R=1.30 |
| 57 H | -3.212514890000 | 1.717360090000  | 7.923802660000  | R=1.30 |
| 58 O | -4.110908330000 | 1.743525100000  | 5.505808970000  | R=1.72 |
| 59 C | 3.998657220000  | 1.475975330000  | -0.729214640000 | R=2.00 |
| 60 H | 4.287831270000  | 1.055869450000  | -1.715089940000 | R=1.30 |
| 61 H | 4.713425490000  | 1.039579350000  | 0.002773820000  | R=1.30 |
| 62 C | 4.205998360000  | 3.000355840000  | -0.688741080000 | R=2.00 |
| 63 H | 4.159410260000  | 3.345550170000  | 0.368095420000  | R=1.30 |
| 64 H | 3.407897250000  | 3.533140630000  | -1.244306380000 | R=1.30 |
| 65 C | 5.532035380000  | 3.362880940000  | -1.287520440000 | R=2.00 |
| 66 H | 7.089848740000  | 3.371080480000  | -4.155274380000 | R=1.30 |
| 67 C | 7.070412840000  | 3.233664480000  | -3.052682420000 | R=2.00 |
| 68 O | 5.711582620000  | 3.172744080000  | -2.658438330000 | R=1.72 |
| 69 O | -5.813755920000 | -2.529394740000 | -4.865219370000 | R=1.72 |
| 70 O | -3.940597920000 | -3.835004370000 | -5.142402040000 | R=1.72 |
| 71 O | 6.403733790000  | 3.834814240000  | -0.566222240000 | R=1.72 |
| 72 C | -4.179266770000 | -2.332740270000 | -3.178700100000 | R=2.00 |
| 73 C | -4.713770840000 | -2.894345320000 | -4.463439880000 | R=2.00 |
| 74 H | 7.597544050000  | 4.118252520000  | -2.627439840000 | R=1.30 |
| 75 H | 0.229390790000  | -1.542023770000 | 8.077981480000  | R=1.30 |
| 76 H | 0.328907930000  | -0.537427920000 | 3.119419790000  | R=1.30 |
| 77 H | -0.434864190000 | 1.599064690000  | 4.216423340000  | R=1.30 |
| 78 H | 1.222351140000  | 1.415123730000  | 2.374281860000  | R=1.30 |
| 79 H | 3.332683990000  | -0.491189390000 | 0.899712950000  | R=1.30 |
| 80 H | 2.312802860000  | 1.708963910000  | 0.511923320000  | R=1.30 |
| 81 H | -3.981476820000 | -3.179439230000 | -2.496766260000 | R=1.30 |
| 82 H | 1.011294340000  | 2.378410740000  | -1.218385230000 | R=1.30 |
| 83 H | -0.098177480000 | -1.950929820000 | -2.353095570000 | R=1.30 |
| 84 H | -1.502045330000 | -0.240826910000 | -2.616284850000 | R=1.30 |
| 85 H | -2.237593320000 | -2.040477900000 | -4.151645350000 | R=1.30 |
| 86 H | -3.230307680000 | -0.584720210000 | -3.978538840000 | R=1.30 |
| 87 H | -3.736169850000 | 0.124492510000  | -1.540841090000 | R=1.30 |
| 88 O | -0.112790790000 | 0.445564840000  | 7.676224320000  | R=1.72 |
| 89 H | 0.314372290000  | 0.153651920000  | 10.583205570000 | R=1.30 |
| 90 H | 9.915816020000  | 1.456716020000  | -2.509593220000 | R=1.30 |
| 91 H | 10.075857630000 | 0.469322520000  | -4.629022380000 | R=1.30 |
| 92 C | -4.496088910000 | -4.179915820000 | -6.395669620000 | R=2.00 |
| 93 H | -4.651213580000 | -3.274182730000 | -7.027078820000 | R=1.30 |
| 94 H | -5.470646170000 | -4.699595770000 | -6.251872000000 | R=1.30 |
| 95 O | 7.097694340000  | 0.834090410000  | -3.272243190000 | R=1.72 |
| 96 H | 7.836546990000  | 1.800052020000  | -1.610358900000 | R=1.30 |
| 97 C | 7.964924860000  | 0.161200190000  | -4.154693960000 | R=2.00 |
| 98 C | 9.144233320000  | 1.054079250000  | -4.467494600000 | R=2.00 |
| 99 C | 9.232723910000  | 1.924236870000  | -3.253522320000 | R=2.00 |

|       |                 |                 |                 |        |
|-------|-----------------|-----------------|-----------------|--------|
| 100 C | 7.804851960000  | 1.922930290000  | -2.714811700000 | R=2.00 |
| 101 H | 9.612559070000  | 2.939120420000  | -3.505318720000 | R=1.30 |
| 102 H | 7.421021860000  | -0.102860560000 | -5.086449560000 | R=1.30 |
| 103 H | 8.316047570000  | -0.775978660000 | -3.670023170000 | R=1.30 |
| 104 H | 8.923548050000  | 1.674285210000  | -5.364486530000 | R=1.30 |
| 105 C | -3.547652570000 | -5.130635640000 | -7.133187400000 | R=2.00 |
| 106 C | -2.230826100000 | -4.459100940000 | -7.512155030000 | R=2.00 |
| 107 C | -1.228717550000 | -5.550753550000 | -7.308227130000 | R=2.00 |
| 108 C | -1.884426320000 | -6.415789560000 | -6.254233220000 | R=2.00 |
| 109 O | -3.283009640000 | -6.265524120000 | -6.335511810000 | R=1.72 |
| 110 H | -2.238306590000 | -4.103661450000 | -8.565733750000 | R=1.30 |
| 111 H | -1.991014480000 | -3.607372550000 | -6.836624490000 | R=1.30 |
| 112 H | -0.246733030000 | -5.155809650000 | -6.967837770000 | R=1.30 |
| 113 H | -1.100286340000 | -6.130504970000 | -8.249224640000 | R=1.30 |
| 114 H | -1.547619440000 | -6.100213640000 | -5.242355660000 | R=1.30 |
| 115 H | -0.463589110000 | -1.471468010000 | 10.317070550000 | R=1.30 |
| 116 C | -1.194070390000 | 1.065237990000  | 8.337804360000  | R=2.00 |
| 117 C | 0.406780280000  | -0.544405030000 | 8.535314800000  | R=2.00 |
| 118 C | -0.287546130000 | -0.464311930000 | 9.880220800000  | R=2.00 |
| 119 C | -1.569646260000 | 0.233915250000  | 9.555242570000  | R=2.00 |
| 120 H | -1.917665220000 | 0.869648520000  | 10.398549800000 | R=1.30 |
| 121 H | -0.863856880000 | 2.072719980000  | 8.678242800000  | R=1.30 |

END

#### GUIBONDS

1 1 2 1.0  
 2 1 3 1.0  
 3 1 4 1.0  
 4 1 5 1.0  
 5 1 6 1.0  
 6 1 7 1.0  
 7 2 8 1.0  
 8 3 11 1.0  
 9 4 20 1.0  
 10 5 23 1.0  
 11 6 32 1.0  
 12 7 35 1.0  
 13 8 9 1.0  
 14 8 12 1.0  
 15 55 51 1.0  
 16 9 11 1.0  
 17 11 16 1.0  
 18 12 13 1.0  
 19 12 14 1.0  
 20 12 15 1.0  
 21 16 17 1.0

22 16 18 1.0  
23 16 19 1.0  
24 20 21 1.0  
25 20 24 1.0  
26 59 61 1.0  
27 21 23 1.0  
28 23 28 1.0  
29 24 25 1.0  
30 40 26 1.0  
31 24 27 1.0  
32 28 29 1.0  
33 28 30 1.0  
34 40 31 1.0  
35 32 33 1.0  
36 32 36 1.0  
37 34 33 1.0  
38 33 35 1.0  
39 35 40 1.0  
40 36 37 1.0  
41 36 38 1.0  
42 36 39 1.0  
43 40 41 1.0  
44 42 28 1.0  
45 43 24 1.0  
46 50 10 1.0  
47 44 45 1.0  
48 44 46 1.0  
49 50 44 1.0  
50 50 48 1.0  
51 44 9 1.0  
52 50 47 1.0  
53 105 92 1.0  
54 75 117 1.0  
55 55 54 1.0  
56 51 47 1.0  
57 120 119 1.0  
58 53 105 1.0  
59 55 57 1.0  
60 58 47 2.0  
61 59 21 1.0  
62 59 60 1.0  
63 62 65 1.0  
64 62 63 1.0  
65 62 64 1.0  
66 62 59 1.0  
67 81 72 1.0



68 68 65 1.0  
69 95 97 1.0  
70 90 99 1.0  
71 67 66 1.0  
72 71 65 2.0  
73 72 73 1.0  
74 72 34 1.0  
75 67 74 1.0  
76 92 70 1.0  
77 76 8 1.0  
78 77 9 1.0  
79 78 11 1.0  
80 79 20 1.0  
81 80 21 1.0  
82 22 72 1.0  
83 82 23 1.0  
84 83 32 1.0  
85 84 33 1.0  
86 85 34 1.0  
87 86 34 1.0  
88 87 35 1.0  
89 69 73 2.0  
90 67 68 1.0  
91 70 73 1.0  
92 116 119 1.0  
93 88 116 1.0  
94 92 93 1.0  
95 92 94 1.0  
96 117 88 1.0  
97 101 99 1.0  
98 97 98 1.0  
99 98 99 1.0  
100 96 100 1.0  
101 100 67 1.0  
102 100 95 1.0  
103 100 99 1.0  
104 102 97 1.0  
105 103 97 1.0  
106 104 98 1.0  
107 91 98 1.0  
108 106 107 1.0  
109 107 108 1.0  
110 108 109 1.0  
111 109 105 1.0  
112 105 106 1.0  
113 110 106 1.0

114 111 106 1.0  
115 112 107 1.0  
116 113 107 1.0  
117 114 108 1.0  
118 49 108 1.0  
119 56 117 1.0  
120 117 118 1.0  
121 118 119 1.0  
122 89 118 1.0  
123 115 118 1.0  
124 52 119 1.0  
125 116 55 1.0  
126 121 116 1.0  
END

SOLVATION

Surf Delley  
Div ndiv=4  
Solvent name=CRS cav0=0.0 cav1=0.0  
Charged method=CONJ conv=1.0E-06 iter=300 corr  
C-Mat EXACT  
SCF VAR ALL  
CSMRSP

END

CHARGE 0.0 2.0

UNRESTRICTED

BASIS

type TZP  
core Small  
createoutput None  
END

XC

GGA Becke Perdew  
END

RELATIVISTIC Scalar ZORA

RESTART GASPHASE.t21

SCF

iterations 50  
mixing 0.2  
diis  
END

BeckeGrid  
Quality Good  
End

ZlmFit  
Quality Normal  
End

ALLPOINTS  
NOPRINT LOGFILE

eor

# =====  
# COSKF  
# =====

rm -f COSKF  
"\$ADFBIN/cpkf" TAPE21 COSKF COSMO

#!/bin/sh

# =====  
# The Molecule  
# =====

"\$ADFBIN/adf" <<eor

TITLE metalcomplex-IX

ATOMS

|      |                 |                 |                 |         |
|------|-----------------|-----------------|-----------------|---------|
| 1 Cr | -0.416229660000 | -0.261169180000 | 0.462879750000  | R=1.875 |
| 2 O  | -1.332286570000 | -0.485379880000 | 2.185521120000  | R=1.72  |
| 3 O  | -0.096273160000 | 1.656022570000  | 0.768487810000  | R=1.72  |
| 4 O  | 1.298667190000  | -0.791386750000 | 1.255267110000  | R=1.72  |
| 5 O  | 0.389880270000  | -0.123643060000 | -1.310160880000 | R=1.72  |
| 6 O  | -0.742473940000 | -2.171410450000 | 0.182148460000  | R=1.72  |
| 7 O  | -2.142222190000 | 0.299553570000  | -0.280387530000 | R=1.72  |

|      |                 |                 |                 |        |
|------|-----------------|-----------------|-----------------|--------|
| 8 C  | -0.691236260000 | 0.097639170000  | 3.280858130000  | R=2.00 |
| 9 C  | -0.675109340000 | 1.628019030000  | 3.134167390000  | R=2.00 |
| 10 H | -1.637840740000 | 4.134459590000  | 3.819743640000  | R=1.30 |
| 11 C | 0.359208040000  | 1.991128220000  | 2.055686640000  | R=2.00 |
| 12 C | -1.396673200000 | -0.348655010000 | 4.566239460000  | R=2.00 |
| 13 H | -1.341537860000 | -1.454452560000 | 4.655809300000  | R=1.30 |
| 14 H | -2.466689310000 | -0.056875710000 | 4.568406590000  | R=1.30 |
| 15 H | -0.897315910000 | 0.094593490000  | 5.453858950000  | R=1.30 |
| 16 C | 0.702910150000  | 3.483185620000  | 2.076865580000  | R=2.00 |
| 17 H | 1.517435350000  | 3.688233190000  | 1.349708070000  | R=1.30 |
| 18 H | 1.052594250000  | 3.788832170000  | 3.086018640000  | R=1.30 |
| 19 H | -0.176903460000 | 4.097518110000  | 1.792841100000  | R=1.30 |
| 20 C | 2.433962350000  | -0.738835940000 | 0.422183960000  | R=2.00 |
| 21 C | 2.547238720000  | 0.591613070000  | -0.363963280000 | R=2.00 |
| 22 H | -5.103589280000 | -2.170180620000 | -2.149273450000 | R=1.30 |
| 23 C | 1.451996870000  | 0.776090350000  | -1.464977030000 | R=2.00 |
| 24 C | 2.580870290000  | -2.008079870000 | -0.425229410000 | R=2.00 |
| 25 H | 1.857921180000  | -2.050471730000 | -1.255699520000 | R=1.30 |
| 26 H | -4.483625270000 | -2.093691240000 | 0.106506610000  | R=1.30 |
| 27 H | 3.601690160000  | -2.056035350000 | -0.859610840000 | R=1.30 |
| 28 C | 1.948800880000  | 0.591961050000  | -2.907913470000 | R=2.00 |
| 29 H | 1.090389480000  | 0.673442060000  | -3.608918050000 | R=1.30 |
| 30 H | 2.403768730000  | -0.411881320000 | -3.042242790000 | R=1.30 |
| 31 H | -4.077549870000 | -0.697396220000 | 1.138320440000  | R=1.30 |
| 32 C | -1.149505950000 | -2.578612460000 | -1.102310450000 | R=2.00 |
| 33 C | -2.201396560000 | -1.622578620000 | -1.737143630000 | R=2.00 |
| 34 C | -3.060755080000 | -2.213216860000 | -2.895202950000 | R=2.00 |
| 35 C | -2.968316740000 | -0.741751750000 | -0.730158060000 | R=2.00 |
| 36 C | -1.605665050000 | -4.036772050000 | -0.976157350000 | R=2.00 |
| 37 H | -0.777964590000 | -4.643403980000 | -0.550232340000 | R=1.30 |
| 38 H | -1.857140690000 | -4.479391700000 | -1.961088190000 | R=1.30 |
| 39 H | -2.469429840000 | -4.120825030000 | -0.285692620000 | R=1.30 |
| 40 C | -3.647552890000 | -1.456842290000 | 0.451126710000  | R=2.00 |
| 41 H | -2.958623790000 | -2.089662510000 | 1.037720040000  | R=1.30 |
| 42 H | 2.677695620000  | 1.372620570000  | -3.200439220000 | R=1.30 |
| 43 H | 2.435280830000  | -2.904577300000 | 0.213897920000  | R=1.30 |
| 44 C | -2.090243730000 | 2.229283540000  | 2.841215750000  | R=2.00 |
| 45 H | -2.887522030000 | 1.458039250000  | 2.901921960000  | R=1.30 |
| 46 H | -2.146949040000 | 2.610317420000  | 1.799361960000  | R=1.30 |
| 47 C | -2.765950250000 | 2.898799410000  | 5.166915020000  | R=2.00 |
| 48 H | -3.355661070000 | 3.906160910000  | 3.375295560000  | R=1.30 |
| 49 H | -2.067986860000 | 4.217855730000  | 9.623813030000  | R=1.30 |
| 50 C | -2.459251440000 | 3.387783570000  | 3.780680120000  | R=2.00 |
| 51 O | -1.734697340000 | 2.867577500000  | 6.105679440000  | R=1.72 |
| 52 H | -0.181045300000 | 1.642426220000  | 7.861634150000  | R=1.30 |
| 53 H | -1.275390000000 | 1.791611600000  | 9.258996460000  | R=1.30 |

|      |                 |                 |                 |        |
|------|-----------------|-----------------|-----------------|--------|
| 54 H | -2.519578500000 | 1.278425640000  | 7.201069680000  | R=1.30 |
| 55 C | -2.154849040000 | 2.322042210000  | 7.339701010000  | R=2.00 |
| 56 C | -0.971716830000 | 2.284984390000  | 8.304714870000  | R=2.00 |
| 57 H | -2.965928340000 | 2.940226350000  | 7.786158100000  | R=1.30 |
| 58 O | -3.907121270000 | 2.531289980000  | 5.426850470000  | R=1.72 |
| 59 C | 4.010603170000  | 0.852720880000  | -0.828450620000 | R=2.00 |
| 60 H | 4.251666710000  | 0.259925600000  | -1.735295930000 | R=1.30 |
| 61 H | 4.722053630000  | 0.506206370000  | -0.046842960000 | R=1.30 |
| 62 C | 4.295887550000  | 2.348768290000  | -1.047557190000 | R=2.00 |
| 63 H | 4.281572930000  | 2.868975330000  | -0.063956370000 | R=1.30 |
| 64 H | 3.518015560000  | 2.821619940000  | -1.680509060000 | R=1.30 |
| 65 C | 5.630741940000  | 2.536455620000  | -1.705124940000 | R=2.00 |
| 66 H | 7.115181810000  | 2.110708920000  | -4.578740540000 | R=1.30 |
| 67 C | 7.127928320000  | 2.142493010000  | -3.468532820000 | R=2.00 |
| 68 O | 5.783817310000  | 2.106744020000  | -3.025013830000 | R=1.72 |
| 69 H | 7.910657870000  | 0.878585590000  | -1.855785330000 | R=1.30 |
| 70 O | -4.221503410000 | -4.796362190000 | -4.117433150000 | R=1.72 |
| 71 O | 6.535073780000  | 3.072564430000  | -1.074189020000 | R=1.72 |
| 72 C | -4.361715330000 | -2.925032240000 | -2.489002710000 | R=2.00 |
| 73 C | -4.921873560000 | -3.682259070000 | -3.657036190000 | R=2.00 |
| 74 H | 7.643182860000  | 3.092066500000  | -3.199730660000 | R=1.30 |
| 75 H | -4.153048490000 | -6.715214670000 | -6.880377450000 | R=1.30 |
| 76 H | 0.342145780000  | -0.294242710000 | 3.366979100000  | R=1.30 |
| 77 H | -0.286291950000 | 2.031002780000  | 4.096006880000  | R=1.30 |
| 78 H | 1.305357120000  | 1.459985740000  | 2.280705750000  | R=1.30 |
| 79 H | 3.291814070000  | -0.766529110000 | 1.129048860000  | R=1.30 |
| 80 H | 2.370046250000  | 1.382856050000  | 0.383836350000  | R=1.30 |
| 81 H | -4.196828410000 | -3.644416710000 | -1.666595910000 | R=1.30 |
| 82 H | 1.051660710000  | 1.811010030000  | -1.407083750000 | R=1.30 |
| 83 H | -0.261856230000 | -2.598661670000 | -1.767276270000 | R=1.30 |
| 84 H | -1.590288230000 | -0.890339520000 | -2.305667250000 | R=1.30 |
| 85 H | -2.421714490000 | -2.887828690000 | -3.506246310000 | R=1.30 |
| 86 H | -3.348871300000 | -1.381343740000 | -3.577871500000 | R=1.30 |
| 87 H | -3.788719020000 | -0.244727130000 | -1.292489660000 | R=1.30 |
| 88 H | 7.356220350000  | 0.005579010000  | -3.303859520000 | R=1.30 |
| 89 H | -0.605140260000 | 3.643916690000  | 10.555781120000 | R=1.30 |
| 90 C | 7.900550220000  | 0.914894610000  | -2.970991690000 | R=2.00 |
| 91 H | -0.585983060000 | 5.223728730000  | 9.706629500000  | R=1.30 |
| 92 C | -4.685565770000 | -5.227595120000 | -5.380146730000 | R=2.00 |
| 93 H | -4.648849800000 | -4.396172560000 | -6.120472380000 | R=1.30 |
| 94 H | -5.730386640000 | -5.604872350000 | -5.301232870000 | R=1.30 |
| 95 C | -3.800824150000 | -6.368937910000 | -5.879449570000 | R=2.00 |
| 96 H | -3.926264740000 | -7.231600340000 | -5.190912180000 | R=1.30 |
| 97 O | -5.984290840000 | -3.321203290000 | -4.152302070000 | R=1.72 |
| 98 O | 9.192267610000  | 0.881672940000  | -3.548072300000 | R=1.72 |
| 99 C | 10.136675150000 | 1.455798650000  | -2.671282060000 | R=2.00 |

|       |                 |                 |                 |        |
|-------|-----------------|-----------------|-----------------|--------|
| 100 H | 10.263593180000 | 0.827046680000  | -1.762528860000 | R=1.30 |
| 101 H | 11.117055450000 | 1.502459170000  | -3.188117390000 | R=1.30 |
| 102 H | 9.854769120000  | 2.494022730000  | -2.387865090000 | R=1.30 |
| 103 O | -2.436316690000 | -5.990575210000 | -5.857268320000 | R=1.72 |
| 104 C | -2.038082280000 | -5.504300410000 | -7.119967460000 | R=2.00 |
| 105 H | -0.991486230000 | -5.144083730000 | -7.045605690000 | R=1.30 |
| 106 H | -2.062445320000 | -6.314757550000 | -7.881346310000 | R=1.30 |
| 107 H | -2.666393320000 | -4.646201070000 | -7.444970670000 | R=1.30 |
| 108 O | -0.433012500000 | 3.582668110000  | 8.480606440000  | R=1.72 |
| 109 C | -0.956454270000 | 4.179817910000  | 9.646594970000  | R=2.00 |

END

#### GUIBONDS

1 1 2 1.0  
 2 1 3 1.0  
 3 1 4 1.0  
 4 1 5 1.0  
 5 1 6 1.0  
 6 1 7 1.0  
 7 2 8 1.0  
 8 3 11 1.0  
 9 4 20 1.0  
 10 5 23 1.0  
 11 6 32 1.0  
 12 7 35 1.0  
 13 8 9 1.0  
 14 8 12 1.0  
 15 55 51 1.0  
 16 9 11 1.0  
 17 11 16 1.0  
 18 12 13 1.0  
 19 12 14 1.0  
 20 12 15 1.0  
 21 16 17 1.0  
 22 16 18 1.0  
 23 16 19 1.0  
 24 20 21 1.0  
 25 20 24 1.0  
 26 59 61 1.0  
 27 21 23 1.0  
 28 23 28 1.0  
 29 24 25 1.0  
 30 40 26 1.0  
 31 24 27 1.0  
 32 28 29 1.0  
 33 28 30 1.0

34 40 31 1.0  
35 32 33 1.0  
36 32 36 1.0  
37 34 33 1.0  
38 33 35 1.0  
39 35 40 1.0  
40 36 37 1.0  
41 36 38 1.0  
42 36 39 1.0  
43 40 41 1.0  
44 42 28 1.0  
45 43 24 1.0  
46 50 10 1.0  
47 44 45 1.0  
48 44 46 1.0  
49 50 44 1.0  
50 50 48 1.0  
51 44 9 1.0  
52 50 47 1.0  
53 56 52 1.0  
54 108 56 1.0  
55 55 54 1.0  
56 51 47 1.0  
57 55 56 1.0  
58 56 53 1.0  
59 55 57 1.0  
60 58 47 2.0  
61 59 21 1.0  
62 59 60 1.0  
63 62 65 1.0  
64 62 63 1.0  
65 62 64 1.0  
66 62 59 1.0  
67 90 69 1.0  
68 68 65 1.0  
69 91 109 1.0  
70 67 90 1.0  
71 67 66 1.0  
72 71 65 2.0  
73 72 73 1.0  
74 72 34 1.0  
75 67 74 1.0  
76 92 70 1.0  
77 76 8 1.0  
78 77 9 1.0  
79 78 11 1.0

80 79 20 1.0  
81 80 21 1.0  
82 22 72 1.0  
83 82 23 1.0  
84 83 32 1.0  
85 84 33 1.0  
86 85 34 1.0  
87 86 34 1.0  
88 87 35 1.0  
89 89 109 1.0  
90 67 68 1.0  
91 70 73 1.0  
92 90 88 1.0  
93 92 95 1.0  
94 92 93 1.0  
95 92 94 1.0  
96 95 96 1.0  
97 95 75 1.0  
98 97 73 2.0  
99 81 72 1.0  
100 100 99 1.0  
101 101 99 1.0  
102 102 99 1.0  
103 99 98 1.0  
104 103 95 1.0  
105 105 104 1.0  
106 106 104 1.0  
107 107 104 1.0  
108 104 103 1.0  
109 109 108 1.0  
110 49 109 1.0  
111 98 90 1.0  
END

SOLVATION

Surf Delley

Div ndiv=4

Solvent name=CRS cav0=0.0 cav1=0.0

Charged method=CONJ conv=1.0E-06 iter=300 corr

C-Mat EXACT

SCF VAR ALL

CSMRSP

END

CHARGE 0.0 2.0



UNRESTRICTED

BASIS

type TZP

core Small

createoutput None

END

XC

GGA Becke Perdew

END

RELATIVISTIC Scalar ZORA

GEOMETRY

branch New

iterations 100

END

SCF

iterations 50

mixing 0.2

diis

END

BeckeGrid

Quality Good

End

ZlmFit

Quality Normal

End

ALLPOINTS

NOPRINT LOGFILE

eor

# =====

# COSKF

# =====

rm -f COSKF

"\$ADFBIN/cpkf" TAPE21 COSKF COSMO

mv TAPE21 GASPHASE.t21

# COSMO-RS Solvent calculation

# =====  
# The Molecule  
# =====

"\$ADFBIN/adf" <<eor  
TITLE metalcomplex-IX

ATOMS

|      |                 |                 |                 |         |
|------|-----------------|-----------------|-----------------|---------|
| 1 Cr | -0.416229660000 | -0.261169180000 | 0.462879750000  | R=1.875 |
| 2 O  | -1.332286570000 | -0.485379880000 | 2.185521120000  | R=1.72  |
| 3 O  | -0.096273160000 | 1.656022570000  | 0.768487810000  | R=1.72  |
| 4 O  | 1.298667190000  | -0.791386750000 | 1.255267110000  | R=1.72  |
| 5 O  | 0.389880270000  | -0.123643060000 | -1.310160880000 | R=1.72  |
| 6 O  | -0.742473940000 | -2.171410450000 | 0.182148460000  | R=1.72  |
| 7 O  | -2.142222190000 | 0.299553570000  | -0.280387530000 | R=1.72  |
| 8 C  | -0.691236260000 | 0.097639170000  | 3.280858130000  | R=2.00  |
| 9 C  | -0.675109340000 | 1.628019030000  | 3.134167390000  | R=2.00  |
| 10 H | -1.637840740000 | 4.134459590000  | 3.819743640000  | R=1.30  |
| 11 C | 0.359208040000  | 1.991128220000  | 2.055686640000  | R=2.00  |
| 12 C | -1.396673200000 | -0.348655010000 | 4.566239460000  | R=2.00  |
| 13 H | -1.341537860000 | -1.454452560000 | 4.655809300000  | R=1.30  |
| 14 H | -2.466689310000 | -0.056875710000 | 4.568406590000  | R=1.30  |
| 15 H | -0.897315910000 | 0.094593490000  | 5.453858950000  | R=1.30  |
| 16 C | 0.702910150000  | 3.483185620000  | 2.076865580000  | R=2.00  |
| 17 H | 1.517435350000  | 3.688233190000  | 1.349708070000  | R=1.30  |
| 18 H | 1.052594250000  | 3.788832170000  | 3.086018640000  | R=1.30  |
| 19 H | -0.176903460000 | 4.097518110000  | 1.792841100000  | R=1.30  |
| 20 C | 2.433962350000  | -0.738835940000 | 0.422183960000  | R=2.00  |
| 21 C | 2.547238720000  | 0.591613070000  | -0.363963280000 | R=2.00  |
| 22 H | -5.103589280000 | -2.170180620000 | -2.149273450000 | R=1.30  |
| 23 C | 1.451996870000  | 0.776090350000  | -1.464977030000 | R=2.00  |
| 24 C | 2.580870290000  | -2.008079870000 | -0.425229410000 | R=2.00  |

|      |                 |                 |                 |        |
|------|-----------------|-----------------|-----------------|--------|
| 25 H | 1.857921180000  | -2.050471730000 | -1.255699520000 | R=1.30 |
| 26 H | -4.483625270000 | -2.093691240000 | 0.106506610000  | R=1.30 |
| 27 H | 3.601690160000  | -2.056035350000 | -0.859610840000 | R=1.30 |
| 28 C | 1.948800880000  | 0.591961050000  | -2.907913470000 | R=2.00 |
| 29 H | 1.090389480000  | 0.673442060000  | -3.608918050000 | R=1.30 |
| 30 H | 2.403768730000  | -0.411881320000 | -3.042242790000 | R=1.30 |
| 31 H | -4.077549870000 | -0.697396220000 | 1.138320440000  | R=1.30 |
| 32 C | -1.149505950000 | -2.578612460000 | -1.102310450000 | R=2.00 |
| 33 C | -2.201396560000 | -1.622578620000 | -1.737143630000 | R=2.00 |
| 34 C | -3.060755080000 | -2.213216860000 | -2.895202950000 | R=2.00 |
| 35 C | -2.968316740000 | -0.741751750000 | -0.730158060000 | R=2.00 |
| 36 C | -1.605665050000 | -4.036772050000 | -0.976157350000 | R=2.00 |
| 37 H | -0.777964590000 | -4.643403980000 | -0.550232340000 | R=1.30 |
| 38 H | -1.857140690000 | -4.479391700000 | -1.961088190000 | R=1.30 |
| 39 H | -2.469429840000 | -4.120825030000 | -0.285692620000 | R=1.30 |
| 40 C | -3.647552890000 | -1.456842290000 | 0.451126710000  | R=2.00 |
| 41 H | -2.958623790000 | -2.089662510000 | 1.037720040000  | R=1.30 |
| 42 H | 2.677695620000  | 1.372620570000  | -3.200439220000 | R=1.30 |
| 43 H | 2.435280830000  | -2.904577300000 | 0.213897920000  | R=1.30 |
| 44 C | -2.090243730000 | 2.229283540000  | 2.841215750000  | R=2.00 |
| 45 H | -2.887522030000 | 1.458039250000  | 2.901921960000  | R=1.30 |
| 46 H | -2.146949040000 | 2.610317420000  | 1.799361960000  | R=1.30 |
| 47 C | -2.765950250000 | 2.898799410000  | 5.166915020000  | R=2.00 |
| 48 H | -3.355661070000 | 3.906160910000  | 3.375295560000  | R=1.30 |
| 49 H | -2.067986860000 | 4.217855730000  | 9.623813030000  | R=1.30 |
| 50 C | -2.459251440000 | 3.387783570000  | 3.780680120000  | R=2.00 |
| 51 O | -1.734697340000 | 2.867577500000  | 6.105679440000  | R=1.72 |
| 52 H | -0.181045300000 | 1.642426220000  | 7.861634150000  | R=1.30 |
| 53 H | -1.275390000000 | 1.791611600000  | 9.258996460000  | R=1.30 |
| 54 H | -2.519578500000 | 1.278425640000  | 7.201069680000  | R=1.30 |
| 55 C | -2.154849040000 | 2.322042210000  | 7.339701010000  | R=2.00 |
| 56 C | -0.971716830000 | 2.284984390000  | 8.304714870000  | R=2.00 |
| 57 H | -2.965928340000 | 2.940226350000  | 7.786158100000  | R=1.30 |
| 58 O | -3.907121270000 | 2.531289980000  | 5.426850470000  | R=1.72 |
| 59 C | 4.010603170000  | 0.852720880000  | -0.828450620000 | R=2.00 |
| 60 H | 4.251666710000  | 0.259925600000  | -1.735295930000 | R=1.30 |
| 61 H | 4.722053630000  | 0.506206370000  | -0.046842960000 | R=1.30 |
| 62 C | 4.295887550000  | 2.348768290000  | -1.047557190000 | R=2.00 |
| 63 H | 4.281572930000  | 2.868975330000  | -0.063956370000 | R=1.30 |
| 64 H | 3.518015560000  | 2.821619940000  | -1.680509060000 | R=1.30 |
| 65 C | 5.630741940000  | 2.536455620000  | -1.705124940000 | R=2.00 |
| 66 H | 7.115181810000  | 2.110708920000  | -4.578740540000 | R=1.30 |
| 67 C | 7.127928320000  | 2.142493010000  | -3.468532820000 | R=2.00 |
| 68 O | 5.783817310000  | 2.106744020000  | -3.025013830000 | R=1.72 |
| 69 H | 7.910657870000  | 0.878585590000  | -1.855785330000 | R=1.30 |
| 70 O | -4.221503410000 | -4.796362190000 | -4.117433150000 | R=1.72 |

|       |                 |                 |                 |        |
|-------|-----------------|-----------------|-----------------|--------|
| 71 O  | 6.535073780000  | 3.072564430000  | -1.074189020000 | R=1.72 |
| 72 C  | -4.361715330000 | -2.925032240000 | -2.489002710000 | R=2.00 |
| 73 C  | -4.921873560000 | -3.682259070000 | -3.657036190000 | R=2.00 |
| 74 H  | 7.643182860000  | 3.092066500000  | -3.199730660000 | R=1.30 |
| 75 H  | -4.153048490000 | -6.715214670000 | -6.880377450000 | R=1.30 |
| 76 H  | 0.342145780000  | -0.294242710000 | 3.366979100000  | R=1.30 |
| 77 H  | -0.286291950000 | 2.031002780000  | 4.096006880000  | R=1.30 |
| 78 H  | 1.305357120000  | 1.459985740000  | 2.280705750000  | R=1.30 |
| 79 H  | 3.291814070000  | -0.766529110000 | 1.129048860000  | R=1.30 |
| 80 H  | 2.370046250000  | 1.382856050000  | 0.383836350000  | R=1.30 |
| 81 H  | -4.196828410000 | -3.644416710000 | -1.666595910000 | R=1.30 |
| 82 H  | 1.051660710000  | 1.811010030000  | -1.407083750000 | R=1.30 |
| 83 H  | -0.261856230000 | -2.598661670000 | -1.767276270000 | R=1.30 |
| 84 H  | -1.590288230000 | -0.890339520000 | -2.305667250000 | R=1.30 |
| 85 H  | -2.421714490000 | -2.887828690000 | -3.506246310000 | R=1.30 |
| 86 H  | -3.348871300000 | -1.381343740000 | -3.577871500000 | R=1.30 |
| 87 H  | -3.788719020000 | -0.244727130000 | -1.292489660000 | R=1.30 |
| 88 H  | 7.356220350000  | 0.005579010000  | -3.303859520000 | R=1.30 |
| 89 H  | -0.605140260000 | 3.643916690000  | 10.555781120000 | R=1.30 |
| 90 C  | 7.900550220000  | 0.914894610000  | -2.970991690000 | R=2.00 |
| 91 H  | -0.585983060000 | 5.223728730000  | 9.706629500000  | R=1.30 |
| 92 C  | -4.685565770000 | -5.227595120000 | -5.380146730000 | R=2.00 |
| 93 H  | -4.648849800000 | -4.396172560000 | -6.120472380000 | R=1.30 |
| 94 H  | -5.730386640000 | -5.604872350000 | -5.301232870000 | R=1.30 |
| 95 C  | -3.800824150000 | -6.368937910000 | -5.879449570000 | R=2.00 |
| 96 H  | -3.926264740000 | -7.231600340000 | -5.190912180000 | R=1.30 |
| 97 O  | -5.984290840000 | -3.321203290000 | -4.152302070000 | R=1.72 |
| 98 O  | 9.192267610000  | 0.881672940000  | -3.548072300000 | R=1.72 |
| 99 C  | 10.136675150000 | 1.455798650000  | -2.671282060000 | R=2.00 |
| 100 H | 10.263593180000 | 0.827046680000  | -1.762528860000 | R=1.30 |
| 101 H | 11.117055450000 | 1.502459170000  | -3.188117390000 | R=1.30 |
| 102 H | 9.854769120000  | 2.494022730000  | -2.387865090000 | R=1.30 |
| 103 O | -2.436316690000 | -5.990575210000 | -5.857268320000 | R=1.72 |
| 104 C | -2.038082280000 | -5.504300410000 | -7.119967460000 | R=2.00 |
| 105 H | -0.991486230000 | -5.144083730000 | -7.045605690000 | R=1.30 |
| 106 H | -2.062445320000 | -6.314757550000 | -7.881346310000 | R=1.30 |
| 107 H | -2.666393320000 | -4.646201070000 | -7.444970670000 | R=1.30 |
| 108 O | -0.433012500000 | 3.582668110000  | 8.480606440000  | R=1.72 |
| 109 C | -0.956454270000 | 4.179817910000  | 9.646594970000  | R=2.00 |

END

#### GUIBONDS

1 1 2 1.0

2 1 3 1.0

3 1 4 1.0

4 1 5 1.0

5 1 6 1.0  
6 1 7 1.0  
7 2 8 1.0  
8 3 11 1.0  
9 4 20 1.0  
10 5 23 1.0  
11 6 32 1.0  
12 7 35 1.0  
13 8 9 1.0  
14 8 12 1.0  
15 55 51 1.0  
16 9 11 1.0  
17 11 16 1.0  
18 12 13 1.0  
19 12 14 1.0  
20 12 15 1.0  
21 16 17 1.0  
22 16 18 1.0  
23 16 19 1.0  
24 20 21 1.0  
25 20 24 1.0  
26 59 61 1.0  
27 21 23 1.0  
28 23 28 1.0  
29 24 25 1.0  
30 40 26 1.0  
31 24 27 1.0  
32 28 29 1.0  
33 28 30 1.0  
34 40 31 1.0  
35 32 33 1.0  
36 32 36 1.0  
37 34 33 1.0  
38 33 35 1.0  
39 35 40 1.0  
40 36 37 1.0  
41 36 38 1.0  
42 36 39 1.0  
43 40 41 1.0  
44 42 28 1.0  
45 43 24 1.0  
46 50 10 1.0  
47 44 45 1.0  
48 44 46 1.0  
49 50 44 1.0  
50 50 48 1.0

51 44 9 1.0  
52 50 47 1.0  
53 56 52 1.0  
54 108 56 1.0  
55 55 54 1.0  
56 51 47 1.0  
57 55 56 1.0  
58 56 53 1.0  
59 55 57 1.0  
60 58 47 2.0  
61 59 21 1.0  
62 59 60 1.0  
63 62 65 1.0  
64 62 63 1.0  
65 62 64 1.0  
66 62 59 1.0  
67 90 69 1.0  
68 68 65 1.0  
69 91 109 1.0  
70 67 90 1.0  
71 67 66 1.0  
72 71 65 2.0  
73 72 73 1.0  
74 72 34 1.0  
75 67 74 1.0  
76 92 70 1.0  
77 76 8 1.0  
78 77 9 1.0  
79 78 11 1.0  
80 79 20 1.0  
81 80 21 1.0  
82 22 72 1.0  
83 82 23 1.0  
84 83 32 1.0  
85 84 33 1.0  
86 85 34 1.0  
87 86 34 1.0  
88 87 35 1.0  
89 89 109 1.0  
90 67 68 1.0  
91 70 73 1.0  
92 90 88 1.0  
93 92 95 1.0  
94 92 93 1.0  
95 92 94 1.0  
96 95 96 1.0

97 95 75 1.0  
98 97 73 2.0  
99 81 72 1.0  
100 100 99 1.0  
101 101 99 1.0  
102 102 99 1.0  
103 99 98 1.0  
104 103 95 1.0  
105 105 104 1.0  
106 106 104 1.0  
107 107 104 1.0  
108 104 103 1.0  
109 109 108 1.0  
110 49 109 1.0  
111 98 90 1.0  
END

SOLVATION

Surf Delley  
Div ndiv=4  
Solvent name=CRS cav0=0.0 cav1=0.0  
Charged method=CONJ conv=1.0E-06 iter=300 corr  
C-Mat EXACT  
SCF VAR ALL  
CSMRSP

END

CHARGE 0.0 2.0

UNRESTRICTED

BASIS

type TZP  
core Small  
createoutput None  
END

XC

GGA Becke Perdew  
END

RELATIVISTIC Scalar ZORA

RESTART GASPHASE.t21

SCF  
iterations 50  
mixing 0.2  
diis  
END

BeckeGrid  
Quality Good  
End

ZlmFit  
Quality Normal  
End

ALLPOINTS  
NOPRINT LOGFILE

eor

# =====  
# COSKF  
# =====

rm -f COSKF  
"\$ADFBIN/cpkf" TAPE21 COSKF COSMO

#!/bin/sh

# =====  
# The Molecule  
# =====

"\$ADFBIN/adf" <<eor

TITLE metalcomplex-X

ATOMS

|      |                 |                 |                 |         |
|------|-----------------|-----------------|-----------------|---------|
| 1 Cr | -0.481724850000 | -0.054489550000 | 0.496061880000  | R=1.875 |
| 2 O  | -1.425382660000 | -0.313682690000 | 2.197771230000  | R=1.72  |
| 3 O  | -0.318681110000 | 1.885508040000  | 0.773969320000  | R=1.72  |
| 4 O  | 1.247155560000  | -0.439579310000 | 1.341938280000  | R=1.72  |
| 5 O  | 0.360836170000  | 0.110834720000  | -1.257606930000 | R=1.72  |



|      |                 |                  |                 |        |
|------|-----------------|------------------|-----------------|--------|
| 6 O  | -0.656341180000 | -1.989802170000  | 0.245633060000  | R=1.72 |
| 7 O  | -2.221165650000 | 0.364643470000   | -0.303513900000 | R=1.72 |
| 8 C  | -0.850421090000 | 0.325028140000   | 3.298194070000  | R=2.00 |
| 9 C  | -0.941558450000 | 1.851010120000   | 3.131339270000  | R=2.00 |
| 10 H | -2.588154680000 | -9.020788830000  | -1.622233690000 | R=1.30 |
| 11 C | 0.079642490000  | 2.277878020000   | 2.063665300000  | R=2.00 |
| 12 C | -1.545616650000 | -0.164416070000  | 4.574219450000  | R=2.00 |
| 13 H | -1.415449430000 | -1.263490240000  | 4.668684060000  | R=1.30 |
| 14 H | -2.633043570000 | 0.051343580000   | 4.562094250000  | R=1.30 |
| 15 H | -1.094248750000 | 0.310932780000   | 5.468570240000  | R=1.30 |
| 16 C | 0.303965460000  | 3.792435700000   | 2.060051680000  | R=2.00 |
| 17 H | 1.148337810000  | 4.042301380000   | 1.382705890000  | R=1.30 |
| 18 H | 0.555890830000  | 4.155223920000   | 3.078873720000  | R=1.30 |
| 19 H | -0.599982570000 | 4.324011980000   | 1.695987290000  | R=1.30 |
| 20 C | 2.397860810000  | -0.310179310000  | 0.538727770000  | R=2.00 |
| 21 C | 2.427783210000  | 1.012203110000   | -0.267968720000 | R=2.00 |
| 22 O | -4.129645850000 | -11.172004930000 | -1.667324310000 | R=1.72 |
| 23 C | 1.349616100000  | 1.092970600000   | -1.398692990000 | R=2.00 |
| 24 C | 2.665717300000  | -1.576927560000  | -0.282502450000 | R=2.00 |
| 25 H | 1.958013360000  | -1.698965220000  | -1.118719240000 | R=1.30 |
| 26 H | -4.400032380000 | -2.172735980000  | 0.099555820000  | R=1.30 |
| 27 H | 3.692077670000  | -1.543733810000  | -0.704939320000 | R=1.30 |
| 28 C | 1.897967190000  | 0.936145340000   | -2.825841530000 | R=2.00 |
| 29 H | 1.055206930000  | 0.943260840000   | -3.550072480000 | R=1.30 |
| 30 H | 2.434316830000  | -0.029787960000  | -2.936640420000 | R=1.30 |
| 31 H | -4.100655640000 | -0.733159800000  | 1.106601500000  | R=1.30 |
| 32 C | -1.010764270000 | -2.455066010000  | -1.035087650000 | R=2.00 |
| 33 C | -2.110094780000 | -1.587945660000  | -1.714813750000 | R=2.00 |
| 34 C | -2.902004600000 | -2.264471880000  | -2.875597740000 | R=2.00 |
| 35 C | -2.960160340000 | -0.742685420000  | -0.743855790000 | R=2.00 |
| 36 C | -1.376243250000 | -3.936501330000  | -0.879039960000 | R=2.00 |
| 37 H | -0.524819350000 | -4.476409770000  | -0.412067630000 | R=1.30 |
| 38 H | -1.569520130000 | -4.422294610000  | -1.856690060000 | R=1.30 |
| 39 H | -2.254224070000 | -4.058178290000  | -0.212728530000 | R=1.30 |
| 40 C | -3.611698950000 | -1.476779090000  | 0.441873770000  | R=2.00 |
| 41 H | -2.893569080000 | -2.052431350000  | 1.051780800000  | R=1.30 |
| 42 H | 2.570788350000  | 1.770770390000   | -3.105713040000 | R=1.30 |
| 43 H | 2.591274320000  | -2.470400730000  | 0.372901060000  | R=1.30 |
| 44 C | -2.393380930000 | 2.348357910000   | 2.825791490000  | R=2.00 |
| 45 H | -3.143278360000 | 1.540387070000   | 2.956587540000  | R=1.30 |
| 46 H | -2.483085400000 | 2.643219730000   | 1.758534440000  | R=1.30 |
| 47 C | -3.098565510000 | 3.167186090000   | 5.112366700000  | R=2.00 |
| 48 H | -3.750793100000 | 3.980837210000   | 3.238683990000  | R=1.30 |
| 49 H | -1.438381170000 | 2.262721300000   | 9.174972650000  | R=1.30 |
| 50 C | -2.825890380000 | 3.551263140000   | 3.682960770000  | R=2.00 |
| 51 O | -2.014375580000 | 2.902525780000   | 5.946399920000  | R=1.72 |

|      |                 |                  |                 |        |
|------|-----------------|------------------|-----------------|--------|
| 52 H | -0.758846100000 | 1.372957700000   | 7.769542510000  | R=1.30 |
| 53 H | 1.315316720000  | 2.076849140000   | 8.455863470000  | R=1.30 |
| 54 H | -3.089439540000 | 1.799311900000   | 7.352520920000  | R=1.30 |
| 55 C | -2.399330320000 | 2.671379330000   | 7.284888060000  | R=2.00 |
| 56 C | -1.152553130000 | 2.361178690000   | 8.105915640000  | R=2.00 |
| 57 H | -2.891662430000 | 3.575883350000   | 7.709363560000  | R=1.30 |
| 58 O | -4.258774510000 | 3.122159580000   | 5.507215520000  | R=1.72 |
| 59 C | 3.877239560000  | 1.381784210000   | -0.701473310000 | R=2.00 |
| 60 H | 4.186987760000  | 0.798297550000   | -1.593741260000 | R=1.30 |
| 61 H | 4.594924000000  | 1.104270770000   | 0.101595560000  | R=1.30 |
| 62 C | 4.045047120000  | 2.893151970000   | -0.940073750000 | R=2.00 |
| 63 H | -6.036519830000 | -11.747532340000 | -2.277700910000 | R=1.30 |
| 64 H | 3.188331850000  | 3.302479010000   | -1.514606110000 | R=1.30 |
| 65 C | 5.314636660000  | 3.175734050000   | -1.686103420000 | R=2.00 |
| 66 H | 6.358085880000  | 4.311168130000   | -4.557396240000 | R=1.30 |
| 67 C | 6.473747010000  | 3.648367230000   | -3.673446790000 | R=2.00 |
| 68 O | 5.221540680000  | 3.595812560000   | -3.014363170000 | R=1.72 |
| 69 H | 7.053110940000  | 1.596849750000   | -3.298875340000 | R=1.30 |
| 70 O | -4.011498000000 | -4.993707900000  | -3.983462100000 | R=1.72 |
| 71 O | 6.387579520000  | 3.012166150000   | -1.115593400000 | R=1.72 |
| 72 C | -4.176657130000 | -3.025123600000  | -2.477310440000 | R=2.00 |
| 73 C | -4.690007160000 | -3.825542250000  | -3.637393300000 | R=2.00 |
| 74 H | 7.274401190000  | 4.109377540000   | -3.050915350000 | R=1.30 |
| 75 H | -4.213563300000 | -7.351338750000  | -6.341594600000 | R=1.30 |
| 76 H | 0.207037140000  | 0.012487060000   | 3.409827450000  | R=1.30 |
| 77 H | -0.587066890000 | 2.290419310000   | 4.084232760000  | R=1.30 |
| 78 H | 1.058468660000  | 1.826907130000   | 2.319802080000  | R=1.30 |
| 79 H | 3.235849120000  | -0.258408150000  | 1.267883000000  | R=1.30 |
| 80 H | 2.172211170000  | 1.799662160000   | 0.460539180000  | R=1.30 |
| 81 H | -3.992542120000 | -3.721000800000  | -1.638029780000 | R=1.30 |
| 82 H | 0.864521130000  | 2.091981450000   | -1.365498690000 | R=1.30 |
| 83 H | -0.109294130000 | -2.432950600000  | -1.681834350000 | R=1.30 |
| 84 H | -1.536463340000 | -0.827700660000  | -2.286020010000 | R=1.30 |
| 85 H | -2.215647980000 | -2.927878410000  | -3.445812900000 | R=1.30 |
| 86 H | -3.212380860000 | -1.472481100000  | -3.594959590000 | R=1.30 |
| 87 H | -3.801136000000 | -0.317347820000  | -1.333638060000 | R=1.30 |
| 88 H | 6.050905500000  | 1.856024600000   | -4.792560320000 | R=1.30 |
| 89 H | 9.510105910000  | 1.944775140000   | -7.110218300000 | R=1.30 |
| 90 C | 6.884304840000  | 2.263240890000   | -4.174657580000 | R=2.00 |
| 91 H | -2.750843590000 | -6.742005130000  | -5.522497770000 | R=1.30 |
| 92 C | -4.569691740000 | -5.619259490000  | -5.120300570000 | R=2.00 |
| 93 H | -4.449511760000 | -4.965214540000  | -6.013643440000 | R=1.30 |
| 94 H | -5.650240300000 | -5.844484620000  | -4.964610860000 | R=1.30 |
| 95 C | -3.842007800000 | -6.934618820000  | -5.381452720000 | R=2.00 |
| 96 H | -2.201193610000 | -8.545742850000  | -4.063182670000 | R=1.30 |
| 97 O | -5.692003860000 | -3.441454410000  | -4.231753030000 | R=1.72 |

|       |                 |                  |                 |        |
|-------|-----------------|------------------|-----------------|--------|
| 98 H  | 4.066863800000  | 3.424315530000   | 0.036651360000  | R=1.30 |
| 99 H  | -5.947837650000 | -10.191335660000 | -1.325108410000 | R=1.30 |
| 100 C | -5.523006470000 | -11.212053470000 | -1.448893820000 | R=2.00 |
| 101 H | -4.294280280000 | -8.479624330000  | -1.797247340000 | R=1.30 |
| 102 C | -3.828140250000 | -10.362711980000 | -2.788829080000 | R=2.00 |
| 103 H | -2.052788490000 | 4.347260350000   | 3.660428230000  | R=1.30 |
| 104 H | -4.956731040000 | -2.298039630000  | -2.164325390000 | R=1.30 |
| 105 H | -5.718971980000 | -11.773841220000 | -0.512690060000 | R=1.30 |
| 106 H | -2.956601870000 | -10.816895400000 | -3.306883650000 | R=1.30 |
| 107 O | 8.064583630000  | 2.380810540000   | -4.940211480000 | R=1.72 |
| 108 H | 12.325489900000 | 1.198114780000   | -4.301082690000 | R=1.30 |
| 109 H | 8.603744290000  | 0.389553730000   | -4.619380130000 | R=1.30 |
| 110 H | 7.627139370000  | 0.714088880000   | -6.112829370000 | R=1.30 |
| 111 C | 8.426225750000  | 1.113127800000   | -5.446928800000 | R=2.00 |
| 112 H | 9.955593260000  | 0.260946480000   | -6.739956370000 | R=1.30 |
| 113 H | 12.119566280000 | 0.245037260000   | -5.806430760000 | R=1.30 |
| 114 C | 9.705341520000  | 1.242994800000   | -6.271464300000 | R=2.00 |
| 115 O | 10.751271960000 | 1.782454820000   | -5.484094860000 | R=1.72 |
| 116 C | 11.571740920000 | 0.751075740000   | -4.981116630000 | R=2.00 |
| 117 H | 10.984635560000 | 0.010897870000   | -4.393837790000 | R=1.30 |
| 118 O | -0.230255500000 | 3.430258970000   | 7.975069230000  | R=1.72 |
| 119 C | 1.094158690000  | 2.959396030000   | 7.810519380000  | R=2.00 |
| 120 H | 3.504499250000  | 3.146343430000   | 6.395129720000  | R=1.30 |
| 121 H | 1.780222900000  | 3.769039490000   | 8.138850130000  | R=1.30 |
| 122 C | 1.375895740000  | 2.650174240000   | 6.333465530000  | R=2.00 |
| 123 H | 1.103343200000  | 3.533652110000   | 5.717000850000  | R=1.30 |
| 124 H | 0.751530890000  | 1.792697790000   | 6.010543870000  | R=1.30 |
| 125 C | 2.846049160000  | 2.295105260000   | 6.096799250000  | R=2.00 |
| 126 H | 3.114888300000  | 1.442785850000   | 6.756783100000  | R=1.30 |
| 127 H | 4.547506550000  | 3.210188150000   | 4.255718220000  | R=1.30 |
| 128 O | 3.032388930000  | 1.874777250000   | 4.757369700000  | R=1.72 |
| 129 C | 3.508288860000  | 2.941037290000   | 3.965692930000  | R=2.00 |
| 130 H | 3.525482390000  | 2.615718390000   | 2.904859610000  | R=1.30 |
| 131 H | 2.846460320000  | 3.832067350000   | 4.034919780000  | R=1.30 |
| 132 O | -4.147137480000 | -7.864715740000  | -4.358081530000 | R=1.72 |
| 133 C | -3.036001060000 | -8.060874190000  | -3.507653750000 | R=2.00 |
| 134 H | -2.678741790000 | -7.090771400000  | -3.092802190000 | R=1.30 |
| 135 H | -4.652342290000 | -10.320550330000 | -3.541044790000 | R=1.30 |
| 136 C | -3.441403600000 | -8.950831130000  | -2.331585960000 | R=2.00 |

END

#### GUIBONDS

1 1 2 1.0

2 1 3 1.0

3 1 4 1.0

4 1 5 1.0

5 1 6 1.0  
6 1 7 1.0  
7 2 8 1.0  
8 3 11 1.0  
9 4 20 1.0  
10 5 23 1.0  
11 6 32 1.0  
12 7 35 1.0  
13 8 9 1.0  
14 8 12 1.0  
15 55 51 1.0  
16 9 11 1.0  
17 11 16 1.0  
18 12 13 1.0  
19 12 14 1.0  
20 12 15 1.0  
21 16 17 1.0  
22 16 18 1.0  
23 16 19 1.0  
24 20 21 1.0  
25 20 24 1.0  
26 59 61 1.0  
27 21 23 1.0  
28 23 28 1.0  
29 24 25 1.0  
30 40 26 1.0  
31 24 27 1.0  
32 28 29 1.0  
33 28 30 1.0  
34 40 31 1.0  
35 32 33 1.0  
36 32 36 1.0  
37 34 33 1.0  
38 33 35 1.0  
39 35 40 1.0  
40 36 37 1.0  
41 36 38 1.0  
42 36 39 1.0  
43 40 41 1.0  
44 42 28 1.0  
45 43 24 1.0  
46 136 10 1.0  
47 44 45 1.0  
48 44 46 1.0  
49 50 44 1.0  
50 50 48 1.0

51 44 9 1.0  
52 50 47 1.0  
53 56 52 1.0  
54 56 49 1.0  
55 55 54 1.0  
56 51 47 1.0  
57 55 56 1.0  
58 119 118 1.0  
59 55 57 1.0  
60 58 47 2.0  
61 59 21 1.0  
62 59 60 1.0  
63 62 65 1.0  
64 22 102 1.0  
65 62 64 1.0  
66 62 59 1.0  
67 90 69 1.0  
68 68 65 1.0  
69 95 91 1.0  
70 67 90 1.0  
71 67 66 1.0  
72 71 65 2.0  
73 72 73 1.0  
74 72 34 1.0  
75 67 74 1.0  
76 92 70 1.0  
77 76 8 1.0  
78 77 9 1.0  
79 78 11 1.0  
80 79 20 1.0  
81 80 21 1.0  
82 99 100 1.0  
83 82 23 1.0  
84 83 32 1.0  
85 84 33 1.0  
86 85 34 1.0  
87 86 34 1.0  
88 87 35 1.0  
89 111 107 1.0  
90 67 68 1.0  
91 70 73 1.0  
92 90 88 1.0  
93 92 95 1.0  
94 92 93 1.0  
95 92 94 1.0  
96 133 132 1.0

97 95 75 1.0  
98 97 73 2.0  
99 81 72 1.0  
100 105 100 1.0  
101 63 100 1.0  
102 98 62 1.0  
103 102 106 1.0  
104 136 102 1.0  
105 136 101 1.0  
106 136 133 1.0  
107 100 22 1.0  
108 104 72 1.0  
109 116 115 1.0  
110 111 109 1.0  
111 111 110 1.0  
112 107 90 1.0  
113 111 114 1.0  
114 114 89 1.0  
115 115 114 1.0  
116 114 112 1.0  
117 117 116 1.0  
118 113 116 1.0  
119 108 116 1.0  
120 125 120 1.0  
121 121 119 1.0  
122 53 119 1.0  
123 118 56 1.0  
124 122 125 1.0  
125 122 123 1.0  
126 122 124 1.0  
127 125 126 1.0  
128 129 128 1.0  
129 122 119 1.0  
130 130 129 1.0  
131 131 129 1.0  
132 127 129 1.0  
133 128 125 1.0  
134 134 133 1.0  
135 102 135 1.0  
136 96 133 1.0  
137 132 95 1.0  
138 103 50 1.0  
END

SOLVATION

Surf Delley

Div ndiv=4  
Solvent name=CRS cav0=0.0 cav1=0.0  
Charged method=CONJ conv=1.00E-06 iter=300 corr  
C-Mat EXACT  
SCF VAR ALL  
CSMRSP  
END

CHARGE 0.0 2.0

UNRESTRICTED

BASIS  
type TZP  
core Small  
createoutput None  
END

XC  
GGA Becke Perdew  
END

RELATIVISTIC Scalar ZORA

GEOMETRY  
branch New  
iterations 100  
END

SCF  
iterations 50  
diis  
END

BeckeGrid  
Quality Good  
End

ZlmFit  
Quality Normal  
End

ALLPOINTS

NOPRINT LOGFILE

eor

# =====  
# COSKF  
# =====

rm -f COSKF  
"\$ADFBIN/cpkf" TAPE21 COSKF COSMO

mv TAPE21 GASPHASE.t21

# COSMO-RS Solvent calculation

# =====  
# The Molecule  
# =====

"\$ADFBIN/adf" <<eor  
TITLE metalcomplex-X

ATOMS

|      |                 |                 |                 |         |
|------|-----------------|-----------------|-----------------|---------|
| 1 Cr | -0.481724850000 | -0.054489550000 | 0.496061880000  | R=1.875 |
| 2 O  | -1.425382660000 | -0.313682690000 | 2.197771230000  | R=1.72  |
| 3 O  | -0.318681110000 | 1.885508040000  | 0.773969320000  | R=1.72  |
| 4 O  | 1.247155560000  | -0.439579310000 | 1.341938280000  | R=1.72  |
| 5 O  | 0.360836170000  | 0.110834720000  | -1.257606930000 | R=1.72  |
| 6 O  | -0.656341180000 | -1.989802170000 | 0.245633060000  | R=1.72  |
| 7 O  | -2.221165650000 | 0.364643470000  | -0.303513900000 | R=1.72  |
| 8 C  | -0.850421090000 | 0.325028140000  | 3.298194070000  | R=2.00  |
| 9 C  | -0.941558450000 | 1.851010120000  | 3.131339270000  | R=2.00  |
| 10 H | -2.588154680000 | -9.020788830000 | -1.622233690000 | R=1.30  |
| 11 C | 0.079642490000  | 2.277878020000  | 2.063665300000  | R=2.00  |
| 12 C | -1.545616650000 | -0.164416070000 | 4.574219450000  | R=2.00  |
| 13 H | -1.415449430000 | -1.263490240000 | 4.668684060000  | R=1.30  |
| 14 H | -2.633043570000 | 0.051343580000  | 4.562094250000  | R=1.30  |
| 15 H | -1.094248750000 | 0.310932780000  | 5.468570240000  | R=1.30  |



|      |                 |                  |                 |        |
|------|-----------------|------------------|-----------------|--------|
| 16 C | 0.303965460000  | 3.792435700000   | 2.060051680000  | R=2.00 |
| 17 H | 1.148337810000  | 4.042301380000   | 1.382705890000  | R=1.30 |
| 18 H | 0.555890830000  | 4.155223920000   | 3.078873720000  | R=1.30 |
| 19 H | -0.599982570000 | 4.324011980000   | 1.695987290000  | R=1.30 |
| 20 C | 2.397860810000  | -0.310179310000  | 0.538727770000  | R=2.00 |
| 21 C | 2.427783210000  | 1.012203110000   | -0.267968720000 | R=2.00 |
| 22 O | -4.129645850000 | -11.172004930000 | -1.667324310000 | R=1.72 |
| 23 C | 1.349616100000  | 1.092970600000   | -1.398692990000 | R=2.00 |
| 24 C | 2.665717300000  | -1.576927560000  | -0.282502450000 | R=2.00 |
| 25 H | 1.958013360000  | -1.698965220000  | -1.118719240000 | R=1.30 |
| 26 H | -4.400032380000 | -2.172735980000  | 0.099555820000  | R=1.30 |
| 27 H | 3.692077670000  | -1.543733810000  | -0.704939320000 | R=1.30 |
| 28 C | 1.897967190000  | 0.936145340000   | -2.825841530000 | R=2.00 |
| 29 H | 1.055206930000  | 0.943260840000   | -3.550072480000 | R=1.30 |
| 30 H | 2.434316830000  | -0.029787960000  | -2.936640420000 | R=1.30 |
| 31 H | -4.100655640000 | -0.733159800000  | 1.106601500000  | R=1.30 |
| 32 C | -1.010764270000 | -2.455066010000  | -1.035087650000 | R=2.00 |
| 33 C | -2.110094780000 | -1.587945660000  | -1.714813750000 | R=2.00 |
| 34 C | -2.902004600000 | -2.264471880000  | -2.875597740000 | R=2.00 |
| 35 C | -2.960160340000 | -0.742685420000  | -0.743855790000 | R=2.00 |
| 36 C | -1.376243250000 | -3.936501330000  | -0.879039960000 | R=2.00 |
| 37 H | -0.524819350000 | -4.476409770000  | -0.412067630000 | R=1.30 |
| 38 H | -1.569520130000 | -4.422294610000  | -1.856690060000 | R=1.30 |
| 39 H | -2.254224070000 | -4.058178290000  | -0.212728530000 | R=1.30 |
| 40 C | -3.611698950000 | -1.476779090000  | 0.441873770000  | R=2.00 |
| 41 H | -2.893569080000 | -2.052431350000  | 1.051780800000  | R=1.30 |
| 42 H | 2.570788350000  | 1.770770390000   | -3.105713040000 | R=1.30 |
| 43 H | 2.591274320000  | -2.470400730000  | 0.372901060000  | R=1.30 |
| 44 C | -2.393380930000 | 2.348357910000   | 2.825791490000  | R=2.00 |
| 45 H | -3.143278360000 | 1.540387070000   | 2.956587540000  | R=1.30 |
| 46 H | -2.483085400000 | 2.643219730000   | 1.758534440000  | R=1.30 |
| 47 C | -3.098565510000 | 3.167186090000   | 5.112366700000  | R=2.00 |
| 48 H | -3.750793100000 | 3.980837210000   | 3.238683990000  | R=1.30 |
| 49 H | -1.438381170000 | 2.262721300000   | 9.174972650000  | R=1.30 |
| 50 C | -2.825890380000 | 3.551263140000   | 3.682960770000  | R=2.00 |
| 51 O | -2.014375580000 | 2.902525780000   | 5.946399920000  | R=1.72 |
| 52 H | -0.758846100000 | 1.372957700000   | 7.769542510000  | R=1.30 |
| 53 H | 1.315316720000  | 2.076849140000   | 8.455863470000  | R=1.30 |
| 54 H | -3.089439540000 | 1.799311900000   | 7.352520920000  | R=1.30 |
| 55 C | -2.399330320000 | 2.671379330000   | 7.284888060000  | R=2.00 |
| 56 C | -1.152553130000 | 2.361178690000   | 8.105915640000  | R=2.00 |
| 57 H | -2.891662430000 | 3.575883350000   | 7.709363560000  | R=1.30 |
| 58 O | -4.258774510000 | 3.122159580000   | 5.507215520000  | R=1.72 |
| 59 C | 3.877239560000  | 1.381784210000   | -0.701473310000 | R=2.00 |
| 60 H | 4.186987760000  | 0.798297550000   | -1.593741260000 | R=1.30 |
| 61 H | 4.594924000000  | 1.104270770000   | 0.101595560000  | R=1.30 |

|       |                 |                  |                 |        |
|-------|-----------------|------------------|-----------------|--------|
| 62 C  | 4.045047120000  | 2.893151970000   | -0.940073750000 | R=2.00 |
| 63 H  | -6.036519830000 | -11.747532340000 | -2.277700910000 | R=1.30 |
| 64 H  | 3.188331850000  | 3.302479010000   | -1.514606110000 | R=1.30 |
| 65 C  | 5.314636660000  | 3.175734050000   | -1.686103420000 | R=2.00 |
| 66 H  | 6.358085880000  | 4.311168130000   | -4.557396240000 | R=1.30 |
| 67 C  | 6.473747010000  | 3.648367230000   | -3.673446790000 | R=2.00 |
| 68 O  | 5.221540680000  | 3.595812560000   | -3.014363170000 | R=1.72 |
| 69 H  | 7.053110940000  | 1.596849750000   | -3.298875340000 | R=1.30 |
| 70 O  | -4.011498000000 | -4.993707900000  | -3.983462100000 | R=1.72 |
| 71 O  | 6.387579520000  | 3.012166150000   | -1.115593400000 | R=1.72 |
| 72 C  | -4.176657130000 | -3.025123600000  | -2.477310440000 | R=2.00 |
| 73 C  | -4.690007160000 | -3.825542250000  | -3.637393300000 | R=2.00 |
| 74 H  | 7.274401190000  | 4.109377540000   | -3.050915350000 | R=1.30 |
| 75 H  | -4.213563300000 | -7.351338750000  | -6.341594600000 | R=1.30 |
| 76 H  | 0.207037140000  | 0.012487060000   | 3.409827450000  | R=1.30 |
| 77 H  | -0.587066890000 | 2.290419310000   | 4.084232760000  | R=1.30 |
| 78 H  | 1.058468660000  | 1.826907130000   | 2.319802080000  | R=1.30 |
| 79 H  | 3.235849120000  | -0.258408150000  | 1.267883000000  | R=1.30 |
| 80 H  | 2.172211170000  | 1.799662160000   | 0.460539180000  | R=1.30 |
| 81 H  | -3.992542120000 | -3.721000800000  | -1.638029780000 | R=1.30 |
| 82 H  | 0.864521130000  | 2.091981450000   | -1.365498690000 | R=1.30 |
| 83 H  | -0.109294130000 | -2.432950600000  | -1.681834350000 | R=1.30 |
| 84 H  | -1.536463340000 | -0.827700660000  | -2.286020010000 | R=1.30 |
| 85 H  | -2.215647980000 | -2.927878410000  | -3.445812900000 | R=1.30 |
| 86 H  | -3.212380860000 | -1.472481100000  | -3.594959590000 | R=1.30 |
| 87 H  | -3.801136000000 | -0.317347820000  | -1.333638060000 | R=1.30 |
| 88 H  | 6.050905500000  | 1.856024600000   | -4.792560320000 | R=1.30 |
| 89 H  | 9.510105910000  | 1.944775140000   | -7.110218300000 | R=1.30 |
| 90 C  | 6.884304840000  | 2.263240890000   | -4.174657580000 | R=2.00 |
| 91 H  | -2.750843590000 | -6.742005130000  | -5.522497770000 | R=1.30 |
| 92 C  | -4.569691740000 | -5.619259490000  | -5.120300570000 | R=2.00 |
| 93 H  | -4.449511760000 | -4.965214540000  | -6.013643440000 | R=1.30 |
| 94 H  | -5.650240300000 | -5.844484620000  | -4.964610860000 | R=1.30 |
| 95 C  | -3.842007800000 | -6.934618820000  | -5.381452720000 | R=2.00 |
| 96 H  | -2.201193610000 | -8.545742850000  | -4.063182670000 | R=1.30 |
| 97 O  | -5.692003860000 | -3.441454410000  | -4.231753030000 | R=1.72 |
| 98 H  | 4.066863800000  | 3.424315530000   | 0.036651360000  | R=1.30 |
| 99 H  | -5.947837650000 | -10.191335660000 | -1.325108410000 | R=1.30 |
| 100 C | -5.523006470000 | -11.212053470000 | -1.448893820000 | R=2.00 |
| 101 H | -4.294280280000 | -8.479624330000  | -1.797247340000 | R=1.30 |
| 102 C | -3.828140250000 | -10.362711980000 | -2.788829080000 | R=2.00 |
| 103 H | -2.052788490000 | 4.347260350000   | 3.660428230000  | R=1.30 |
| 104 H | -4.956731040000 | -2.298039630000  | -2.164325390000 | R=1.30 |
| 105 H | -5.718971980000 | -11.773841220000 | -0.512690060000 | R=1.30 |
| 106 H | -2.956601870000 | -10.816895400000 | -3.306883650000 | R=1.30 |
| 107 O | 8.064583630000  | 2.380810540000   | -4.940211480000 | R=1.72 |

|       |                 |                  |                 |        |
|-------|-----------------|------------------|-----------------|--------|
| 108 H | 12.325489900000 | 1.198114780000   | -4.301082690000 | R=1.30 |
| 109 H | 8.603744290000  | 0.389553730000   | -4.619380130000 | R=1.30 |
| 110 H | 7.627139370000  | 0.714088880000   | -6.112829370000 | R=1.30 |
| 111 C | 8.426225750000  | 1.113127800000   | -5.446928800000 | R=2.00 |
| 112 H | 9.955593260000  | 0.260946480000   | -6.739956370000 | R=1.30 |
| 113 H | 12.119566280000 | 0.245037260000   | -5.806430760000 | R=1.30 |
| 114 C | 9.705341520000  | 1.242994800000   | -6.271464300000 | R=2.00 |
| 115 O | 10.751271960000 | 1.782454820000   | -5.484094860000 | R=1.72 |
| 116 C | 11.571740920000 | 0.751075740000   | -4.981116630000 | R=2.00 |
| 117 H | 10.984635560000 | 0.010897870000   | -4.393837790000 | R=1.30 |
| 118 O | -0.230255500000 | 3.430258970000   | 7.975069230000  | R=1.72 |
| 119 C | 1.094158690000  | 2.959396030000   | 7.810519380000  | R=2.00 |
| 120 H | 3.504499250000  | 3.146343430000   | 6.395129720000  | R=1.30 |
| 121 H | 1.780222900000  | 3.769039490000   | 8.138850130000  | R=1.30 |
| 122 C | 1.375895740000  | 2.650174240000   | 6.333465530000  | R=2.00 |
| 123 H | 1.103343200000  | 3.533652110000   | 5.717000850000  | R=1.30 |
| 124 H | 0.751530890000  | 1.792697790000   | 6.010543870000  | R=1.30 |
| 125 C | 2.846049160000  | 2.295105260000   | 6.096799250000  | R=2.00 |
| 126 H | 3.114888300000  | 1.442785850000   | 6.756783100000  | R=1.30 |
| 127 H | 4.547506550000  | 3.210188150000   | 4.255718220000  | R=1.30 |
| 128 O | 3.032388930000  | 1.874777250000   | 4.757369700000  | R=1.72 |
| 129 C | 3.508288860000  | 2.941037290000   | 3.965692930000  | R=2.00 |
| 130 H | 3.525482390000  | 2.615718390000   | 2.904859610000  | R=1.30 |
| 131 H | 2.846460320000  | 3.832067350000   | 4.034919780000  | R=1.30 |
| 132 O | -4.147137480000 | -7.864715740000  | -4.358081530000 | R=1.72 |
| 133 C | -3.036001060000 | -8.060874190000  | -3.507653750000 | R=2.00 |
| 134 H | -2.678741790000 | -7.090771400000  | -3.092802190000 | R=1.30 |
| 135 H | -4.652342290000 | -10.320550330000 | -3.541044790000 | R=1.30 |
| 136 C | -3.441403600000 | -8.950831130000  | -2.331585960000 | R=2.00 |

END

#### GUIBONDS

1 1 2 1.0  
2 1 3 1.0  
3 1 4 1.0  
4 1 5 1.0  
5 1 6 1.0  
6 1 7 1.0  
7 2 8 1.0  
8 3 11 1.0  
9 4 20 1.0  
10 5 23 1.0  
11 6 32 1.0  
12 7 35 1.0  
13 8 9 1.0  
14 8 12 1.0

15 55 51 1.0  
16 9 11 1.0  
17 11 16 1.0  
18 12 13 1.0  
19 12 14 1.0  
20 12 15 1.0  
21 16 17 1.0  
22 16 18 1.0  
23 16 19 1.0  
24 20 21 1.0  
25 20 24 1.0  
26 59 61 1.0  
27 21 23 1.0  
28 23 28 1.0  
29 24 25 1.0  
30 40 26 1.0  
31 24 27 1.0  
32 28 29 1.0  
33 28 30 1.0  
34 40 31 1.0  
35 32 33 1.0  
36 32 36 1.0  
37 34 33 1.0  
38 33 35 1.0  
39 35 40 1.0  
40 36 37 1.0  
41 36 38 1.0  
42 36 39 1.0  
43 40 41 1.0  
44 42 28 1.0  
45 43 24 1.0  
46 136 10 1.0  
47 44 45 1.0  
48 44 46 1.0  
49 50 44 1.0  
50 50 48 1.0  
51 44 9 1.0  
52 50 47 1.0  
53 56 52 1.0  
54 56 49 1.0  
55 55 54 1.0  
56 51 47 1.0  
57 55 56 1.0  
58 119 118 1.0  
59 55 57 1.0  
60 58 47 2.0

61 59 21 1.0  
62 59 60 1.0  
63 62 65 1.0  
64 22 102 1.0  
65 62 64 1.0  
66 62 59 1.0  
67 90 69 1.0  
68 68 65 1.0  
69 95 91 1.0  
70 67 90 1.0  
71 67 66 1.0  
72 71 65 2.0  
73 72 73 1.0  
74 72 34 1.0  
75 67 74 1.0  
76 92 70 1.0  
77 76 8 1.0  
78 77 9 1.0  
79 78 11 1.0  
80 79 20 1.0  
81 80 21 1.0  
82 99 100 1.0  
83 82 23 1.0  
84 83 32 1.0  
85 84 33 1.0  
86 85 34 1.0  
87 86 34 1.0  
88 87 35 1.0  
89 111 107 1.0  
90 67 68 1.0  
91 70 73 1.0  
92 90 88 1.0  
93 92 95 1.0  
94 92 93 1.0  
95 92 94 1.0  
96 133 132 1.0  
97 95 75 1.0  
98 97 73 2.0  
99 81 72 1.0  
100 105 100 1.0  
101 63 100 1.0  
102 98 62 1.0  
103 102 106 1.0  
104 136 102 1.0  
105 136 101 1.0  
106 136 133 1.0

107 100 22 1.0  
108 104 72 1.0  
109 116 115 1.0  
110 111 109 1.0  
111 111 110 1.0  
112 107 90 1.0  
113 111 114 1.0  
114 114 89 1.0  
115 115 114 1.0  
116 114 112 1.0  
117 117 116 1.0  
118 113 116 1.0  
119 108 116 1.0  
120 125 120 1.0  
121 121 119 1.0  
122 53 119 1.0  
123 118 56 1.0  
124 122 125 1.0  
125 122 123 1.0  
126 122 124 1.0  
127 125 126 1.0  
128 129 128 1.0  
129 122 119 1.0  
130 130 129 1.0  
131 131 129 1.0  
132 127 129 1.0  
133 128 125 1.0  
134 134 133 1.0  
135 102 135 1.0  
136 96 133 1.0  
137 132 95 1.0  
138 103 50 1.0  
END

SOLVATION

Surf Delley

Div ndiv=4

Solvent name=CRS cav0=0.0 cav1=0.0

Charged method=CONJ conv=1.00E-06 iter=300 corr

C-Mat EXACT

SCF VAR ALL

CSMRSP

END

CHARGE 0.0 2.0

UNRESTRICTED

BASIS

type TZP

core Small

createoutput None

END

XC

GGA Becke Perdew

END

RELATIVISTIC Scalar ZORA

RESTART GASPHASE.t21

SCF

iterations 50

diis

END

BeckeGrid

Quality Good

End

ZlmFit

Quality Normal

End

ALLPOINTS

NOPRINT LOGFILE

eor

# =====

# COSKF

# =====

rm -f COSKF

"\$ADFBIN/cpkf" TAPE21 COSKF COSMO

#!/bin/sh

# =====  
# The Molecule  
# =====

"\$ADFBIN/adf" <<eor

TITLE metalcomplex-XI

ATOMS

|       |                 |                 |                |         |
|-------|-----------------|-----------------|----------------|---------|
| 1 Cr  | 4.052500000000  | 10.421400000000 | 4.466000000000 | R=1.875 |
| 2 O   | 3.869200000000  | 12.367700000000 | 4.522000000000 | R=1.72  |
| 3 O   | 2.465000000000  | 10.345300000000 | 3.347800000000 | R=1.72  |
| 4 O   | 2.943400000000  | 10.305600000000 | 6.065100000000 | R=1.72  |
| 5 O   | 4.063700000000  | 8.457200000000  | 4.436700000000 | R=1.72  |
| 6 O   | 5.674800000000  | 10.545300000000 | 5.551600000000 | R=1.72  |
| 7 O   | 5.162400000000  | 10.494300000000 | 2.856900000000 | R=1.72  |
| 8 H   | 7.354900000000  | 9.442800000000  | 1.164600000000 | R=1.30  |
| 9 C   | 7.908800000000  | 10.619900000000 | 6.278400000000 | R=2.00  |
| 10 H  | 7.608300000000  | 11.021500000000 | 1.208000000000 | R=1.30  |
| 11 C  | 2.847800000000  | 13.065900000000 | 4.198900000000 | R=2.00  |
| 12 C  | 1.709700000000  | 12.584800000000 | 3.519800000000 | R=2.00  |
| 13 C  | 1.614000000000  | 11.251900000000 | 3.081200000000 | R=2.00  |
| 14 C  | 2.035900000000  | 9.415300000000  | 6.249100000000 | R=2.00  |
| 15 C  | 1.973600000000  | 8.199400000000  | 5.536500000000 | R=2.00  |
| 16 C  | 3.026400000000  | 7.755800000000  | 4.723200000000 | R=2.00  |
| 17 C  | 6.893400000000  | 10.467300000000 | 5.172900000000 | R=2.00  |
| 18 C  | 7.312600000000  | 10.279800000000 | 3.848300000000 | R=2.00  |
| 19 C  | 6.425500000000  | 10.359100000000 | 2.754200000000 | R=2.00  |
| 20 C  | 2.930900000000  | 14.512200000000 | 4.598100000000 | R=2.00  |
| 21 H  | 3.760000000000  | 14.666200000000 | 5.097700000000 | R=1.30  |
| 22 H  | 2.162700000000  | 14.739800000000 | 5.161400000000 | R=1.30  |
| 23 H  | 2.925400000000  | 15.073900000000 | 3.794800000000 | R=1.30  |
| 24 Br | 0.768519625100  | 7.374586859000  | 5.704917848000 | R=2.16  |
| 25 C  | 6.941900000000  | 10.314900000000 | 1.335400000000 | R=2.00  |
| 26 H  | 6.197500000000  | 10.451300000000 | 0.713100000000 | R=1.30  |
| 27 Br | 8.744355785000  | 10.080526050000 | 3.581344454000 | R=2.16  |
| 28 C  | 0.445300000000  | 10.784700000000 | 2.252700000000 | R=2.00  |
| 29 H  | 0.611900000000  | 9.870500000000  | 1.938700000000 | R=1.30  |
| 30 H  | 0.332400000000  | 11.378600000000 | 1.481800000000 | R=1.30  |
| 31 H  | -0.369300000000 | 10.799300000000 | 2.798300000000 | R=1.30  |
| 32 C  | 1.024800000000  | 9.749400000000  | 7.301700000000 | R=2.00  |
| 33 H  | 1.316900000000  | 10.544800000000 | 7.794300000000 | R=1.30  |
| 34 H  | 0.936400000000  | 8.995300000000  | 7.921700000000 | R=1.30  |



|       |                |                 |                |        |
|-------|----------------|-----------------|----------------|--------|
| 35 H  | 0.159400000000 | 9.927200000000  | 6.877800000000 | R=1.30 |
| 36 H  | 8.555700000000 | 11.314200000000 | 6.034500000000 | R=1.30 |
| 37 H  | 7.454000000000 | 10.875900000000 | 7.106900000000 | R=1.30 |
| 38 Br | 0.639354397300 | 13.529755920000 | 3.170059245000 | R=2.16 |
| 39 H  | 8.377500000000 | 9.769300000000  | 6.411400000000 | R=1.30 |
| 40 C  | 3.010000000000 | 6.369200000000  | 4.128700000000 | R=2.00 |
| 41 H  | 3.846700000000 | 6.212000000000  | 3.642900000000 | R=1.30 |
| 42 H  | 2.253500000000 | 6.287100000000  | 3.511400000000 | R=1.30 |
| 43 H  | 2.919500000000 | 5.707700000000  | 4.845500000000 | R=1.30 |

END

#### GUIBONDS

1 1 2 1.0  
 2 1 3 1.0  
 3 1 4 1.0  
 4 1 5 1.0  
 5 1 6 1.0  
 6 1 7 1.0  
 7 2 11 1.0  
 8 3 13 1.0  
 9 4 14 1.0  
 10 5 16 1.0  
 11 6 17 1.0  
 12 7 19 1.0  
 13 25 10 1.0  
 14 24 15 1.0  
 15 40 41 1.0  
 16 11 12 1.0  
 17 11 20 1.0  
 18 12 13 1.0  
 19 9 37 1.0  
 20 13 28 1.0  
 21 14 15 1.0  
 22 14 32 1.0  
 23 15 16 1.0  
 24 40 43 1.0  
 25 16 40 1.0  
 26 17 18 1.0  
 27 17 9 1.0  
 28 18 19 1.0  
 29 40 42 1.0  
 30 19 25 1.0  
 31 20 21 1.0  
 32 20 22 1.0  
 33 20 23 1.0  
 34 27 18 1.0

35 25 26 1.0  
36 25 8 1.0  
37 28 29 1.0  
38 28 30 1.0  
39 28 31 1.0  
40 32 33 1.0  
41 32 34 1.0  
42 32 35 1.0  
43 9 36 1.0  
44 9 39 1.0  
45 38 12 1.0  
END

SOLVATION

Surf Delley  
Div ndiv=4  
Solvent name=CRS cav0=0.0 cav1=0.0  
Charged method=CONJ conv=1.00E-06 iter=300 corr  
C-Mat EXACT  
SCF VAR ALL  
CSMRSP  
END

CHARGE 0.0 3.0

UNRESTRICTED

BASIS

type TZP  
core Small  
createoutput None  
END

XC

GGA Becke Perdew  
END

RELATIVISTIC Scalar ZORA

GEOMETRY

branch New  
iterations 100  
END

```
SCF
iterations 50
mixing 0.2
diis
END
```

```
BeckeGrid
  Quality Good
End
```

```
ZlmFit
  Quality Normal
End
```

```
ALLPOINTS
NOPRINT LOGFILE
```

```
eor
```

```
# =====
# COSKF
# =====
```

```
rm -f COSKF
"\$ADFBIN/cpkf" TAPE21 COSKF COSMO
```

```
mv TAPE21 GASPHASE.t21
```

```
# COSMO-RS Solvent calculation
```

```
# =====
# The Molecule
# =====
```

```
"\$ADFBIN/adf" <<eor
TITLE metalcomplex-XI
```

ATOMS

|       |                 |                 |                |         |
|-------|-----------------|-----------------|----------------|---------|
| 1 Cr  | 4.052500000000  | 10.421400000000 | 4.466000000000 | R=1.875 |
| 2 O   | 3.869200000000  | 12.367700000000 | 4.522000000000 | R=1.72  |
| 3 O   | 2.465000000000  | 10.345300000000 | 3.347800000000 | R=1.72  |
| 4 O   | 2.943400000000  | 10.305600000000 | 6.065100000000 | R=1.72  |
| 5 O   | 4.063700000000  | 8.457200000000  | 4.436700000000 | R=1.72  |
| 6 O   | 5.674800000000  | 10.545300000000 | 5.551600000000 | R=1.72  |
| 7 O   | 5.162400000000  | 10.494300000000 | 2.856900000000 | R=1.72  |
| 8 H   | 7.354900000000  | 9.442800000000  | 1.164600000000 | R=1.30  |
| 9 C   | 7.908800000000  | 10.619900000000 | 6.278400000000 | R=2.00  |
| 10 H  | 7.608300000000  | 11.021500000000 | 1.208000000000 | R=1.30  |
| 11 C  | 2.847800000000  | 13.065900000000 | 4.198900000000 | R=2.00  |
| 12 C  | 1.709700000000  | 12.584800000000 | 3.519800000000 | R=2.00  |
| 13 C  | 1.614000000000  | 11.251900000000 | 3.081200000000 | R=2.00  |
| 14 C  | 2.035900000000  | 9.415300000000  | 6.249100000000 | R=2.00  |
| 15 C  | 1.973600000000  | 8.199400000000  | 5.536500000000 | R=2.00  |
| 16 C  | 3.026400000000  | 7.755800000000  | 4.723200000000 | R=2.00  |
| 17 C  | 6.893400000000  | 10.467300000000 | 5.172900000000 | R=2.00  |
| 18 C  | 7.312600000000  | 10.279800000000 | 3.848300000000 | R=2.00  |
| 19 C  | 6.425500000000  | 10.359100000000 | 2.754200000000 | R=2.00  |
| 20 C  | 2.930900000000  | 14.512200000000 | 4.598100000000 | R=2.00  |
| 21 H  | 3.760000000000  | 14.666200000000 | 5.097700000000 | R=1.30  |
| 22 H  | 2.162700000000  | 14.739800000000 | 5.161400000000 | R=1.30  |
| 23 H  | 2.925400000000  | 15.073900000000 | 3.794800000000 | R=1.30  |
| 24 Br | 0.768519625100  | 7.374586859000  | 5.704917848000 | R=2.16  |
| 25 C  | 6.941900000000  | 10.314900000000 | 1.335400000000 | R=2.00  |
| 26 H  | 6.197500000000  | 10.451300000000 | 0.713100000000 | R=1.30  |
| 27 Br | 8.744355785000  | 10.080526050000 | 3.581344454000 | R=2.16  |
| 28 C  | 0.445300000000  | 10.784700000000 | 2.252700000000 | R=2.00  |
| 29 H  | 0.611900000000  | 9.870500000000  | 1.938700000000 | R=1.30  |
| 30 H  | 0.332400000000  | 11.378600000000 | 1.481800000000 | R=1.30  |
| 31 H  | -0.369300000000 | 10.799300000000 | 2.798300000000 | R=1.30  |
| 32 C  | 1.024800000000  | 9.749400000000  | 7.301700000000 | R=2.00  |
| 33 H  | 1.316900000000  | 10.544800000000 | 7.794300000000 | R=1.30  |
| 34 H  | 0.936400000000  | 8.995300000000  | 7.921700000000 | R=1.30  |
| 35 H  | 0.159400000000  | 9.927200000000  | 6.877800000000 | R=1.30  |
| 36 H  | 8.555700000000  | 11.314200000000 | 6.034500000000 | R=1.30  |
| 37 H  | 7.454000000000  | 10.875900000000 | 7.106900000000 | R=1.30  |
| 38 Br | 0.639354397300  | 13.529755920000 | 3.170059245000 | R=2.16  |
| 39 H  | 8.377500000000  | 9.769300000000  | 6.411400000000 | R=1.30  |
| 40 C  | 3.010000000000  | 6.369200000000  | 4.128700000000 | R=2.00  |
| 41 H  | 3.846700000000  | 6.212000000000  | 3.642900000000 | R=1.30  |
| 42 H  | 2.253500000000  | 6.287100000000  | 3.511400000000 | R=1.30  |
| 43 H  | 2.919500000000  | 5.707700000000  | 4.845500000000 | R=1.30  |
| END   |                 |                 |                |         |

## GUIBONDS

1 1 2 1.0  
2 1 3 1.0  
3 1 4 1.0  
4 1 5 1.0  
5 1 6 1.0  
6 1 7 1.0  
7 2 11 1.0  
8 3 13 1.0  
9 4 14 1.0  
10 5 16 1.0  
11 6 17 1.0  
12 7 19 1.0  
13 25 10 1.0  
14 24 15 1.0  
15 40 41 1.0  
16 11 12 1.0  
17 11 20 1.0  
18 12 13 1.0  
19 9 37 1.0  
20 13 28 1.0  
21 14 15 1.0  
22 14 32 1.0  
23 15 16 1.0  
24 40 43 1.0  
25 16 40 1.0  
26 17 18 1.0  
27 17 9 1.0  
28 18 19 1.0  
29 40 42 1.0  
30 19 25 1.0  
31 20 21 1.0  
32 20 22 1.0  
33 20 23 1.0  
34 27 18 1.0  
35 25 26 1.0  
36 25 8 1.0  
37 28 29 1.0  
38 28 30 1.0  
39 28 31 1.0  
40 32 33 1.0  
41 32 34 1.0  
42 32 35 1.0  
43 9 36 1.0  
44 9 39 1.0  
45 38 12 1.0

END

SOLVATION

Surf Delley

Div ndiv=4

Solvent name=CRS cav0=0.0 cav1=0.0

Charged method=CONJ conv=1.00E-06 iter=300 corr

C-Mat EXACT

SCF VAR ALL

CSMRSP

END

CHARGE 0.0 3.0

UNRESTRICTED

BASIS

type TZP

core Small

createoutput None

END

XC

GGA Becke Perdew

END

RELATIVISTIC Scalar ZORA

RESTART GASPHASE.t21

SCF

iterations 50

mixing 0.2

diis

END

BeckeGrid

Quality Good

End

ZlmFit

Quality Normal

End

ALLPOINTS  
NOPRINT LOGFILE

eor

# =====  
# COSKF  
# =====

rm -f COSKF  
"\$ADFBIN/cpkf" TAPE21 COSKF COSMO

#!/bin/sh

# =====  
# The Molecule  
# =====

"\$ADFBIN/adf" <<eor

TITLE metalcomplex-XII

ATOMS

|      |                 |                 |                 |         |
|------|-----------------|-----------------|-----------------|---------|
| 1 Cr | 0.101825870000  | -0.003777540000 | 1.046791430000  | R=1.875 |
| 2 O  | 1.377543370000  | 0.807682430000  | -0.149331940000 | R=1.72  |
| 3 O  | -1.341346240000 | 0.792147930000  | 0.047114350000  | R=1.72  |
| 4 O  | 0.026185460000  | -1.560045590000 | -0.087808450000 | R=1.72  |
| 5 O  | 2.551022640000  | 1.999468320000  | -2.073157230000 | R=1.72  |
| 6 O  | -2.889226810000 | 1.708887320000  | -1.822055330000 | R=1.72  |
| 7 O  | -0.236595830000 | -3.168778010000 | -2.103426370000 | R=1.72  |
| 8 C  | 3.696395310000  | 1.322982920000  | -0.103322540000 | R=2.00  |
| 9 C  | -2.849565830000 | 2.590393600000  | 0.380197900000  | R=2.00  |
| 10 C | -0.793010720000 | -3.775242480000 | 0.121976630000  | R=2.00  |
| 11 C | 2.591156990000  | 0.769413420000  | 0.498062830000  | R=2.00  |
| 12 C | -1.792403630000 | 1.847276220000  | 0.805811400000  | R=2.00  |
| 13 C | -0.599169670000 | -2.537046830000 | 0.651710030000  | R=2.00  |
| 14 C | 3.603735610000  | 1.969097760000  | -1.452831660000 | R=2.00  |
| 15 C | -3.503998180000 | 2.305135700000  | -0.949608150000 | R=2.00  |
| 16 C | -0.380983570000 | -4.077512390000 | -1.298465510000 | R=2.00  |
| 17 C | 2.604933430000  | 0.101767810000  | 1.855328590000  | R=2.00  |
| 18 C | -1.089105980000 | 2.114811040000  | 2.114670310000  | R=2.00  |
| 19 C | -1.024985460000 | -2.181249480000 | 2.055888320000  | R=2.00  |
| 20 C | 4.818257720000  | 2.596919170000  | -2.074186250000 | R=2.00  |

|      |                 |                 |                 |        |
|------|-----------------|-----------------|-----------------|--------|
| 21 C | -4.910114150000 | 2.743874430000  | -1.251025630000 | R=2.00 |
| 22 C | -0.146073650000 | -5.484625950000 | -1.773512810000 | R=2.00 |
| 23 O | 5.353272330000  | 0.192023950000  | 0.720284940000  | R=1.72 |
| 24 O | -3.314847430000 | 4.687711950000  | 0.568580240000  | R=1.72 |
| 25 O | -2.386433010000 | -5.210462800000 | 0.350646910000  | R=1.72 |
| 26 H | 3.587237250000  | 0.074562250000  | 2.358660820000  | R=1.30 |
| 27 H | 2.261168410000  | -0.947595950000 | 1.744266220000  | R=1.30 |
| 28 H | 1.902049720000  | 0.634801580000  | 2.528621260000  | R=1.30 |
| 29 H | -1.151439940000 | 1.210668900000  | 2.755351880000  | R=1.30 |
| 30 H | -1.513860660000 | 2.966038020000  | 2.683791630000  | R=1.30 |
| 31 H | -0.020990920000 | 2.339276350000  | 1.914313500000  | R=1.30 |
| 32 H | -0.135802400000 | -1.860219620000 | 2.637368640000  | R=1.30 |
| 33 H | -1.506058510000 | -3.017470800000 | 2.601975300000  | R=1.30 |
| 34 H | -1.748598250000 | -1.340822120000 | 2.015223300000  | R=1.30 |
| 35 H | 5.197233240000  | 3.408750100000  | -1.418538250000 | R=1.30 |
| 36 H | 4.573759990000  | 3.029222860000  | -3.068194360000 | R=1.30 |
| 37 H | 5.610523340000  | 1.830566170000  | -2.206548740000 | R=1.30 |
| 38 H | -5.611906580000 | 2.283705180000  | -0.524815760000 | R=1.30 |
| 39 H | -5.208983650000 | 2.421869490000  | -2.271725890000 | R=1.30 |
| 40 H | -4.991041610000 | 3.848840500000  | -1.202088870000 | R=1.30 |
| 41 H | 0.164401040000  | -5.489425520000 | -2.840487220000 | R=1.30 |
| 42 H | -1.074189660000 | -6.084988490000 | -1.683665080000 | R=1.30 |
| 43 H | 0.663590300000  | -5.953564920000 | -1.176752010000 | R=1.30 |
| 44 N | 5.010223760000  | 1.330343420000  | 0.506710540000  | R=1.83 |
| 45 O | 4.950286380000  | 1.904029070000  | 1.568040590000  | R=1.72 |
| 46 N | -1.420596130000 | -4.788833350000 | 0.940214280000  | R=1.83 |
| 47 O | -0.649660230000 | -5.708321630000 | 1.073224770000  | R=1.72 |
| 48 N | -3.321126870000 | 3.669979040000  | 1.218506070000  | R=1.83 |
| 49 O | -4.466743210000 | 3.446169490000  | 1.526634270000  | R=1.72 |

END

#### GUIBONDS

1 2 11 1  
2 3 12 1  
3 4 13 1  
4 5 14 2  
5 6 15 2  
6 7 16 2  
7 8 11 2  
8 8 14 1  
9 9 12 2  
10 9 15 1  
11 10 13 2  
12 10 16 1  
13 11 17 1  
14 12 18 1



15 13 19 1  
16 14 20 1  
17 15 21 1  
18 16 22 1  
19 2 1 1.0  
20 3 1 1.0  
21 4 1 1.0  
22 23 44 2.0  
23 24 48 2.0  
24 25 46 2.0  
25 26 17 1.0  
26 27 17 1.0  
27 28 17 1.0  
28 29 18 1.0  
29 30 18 1.0  
30 31 18 1.0  
31 32 19 1.0  
32 33 19 1.0  
33 34 19 1.0  
34 35 20 1.0  
35 36 20 1.0  
36 37 20 1.0  
37 38 21 1.0  
38 39 21 1.0  
39 40 21 1.0  
40 41 22 1.0  
41 42 22 1.0  
42 43 22 1.0  
43 45 44 2.0  
44 44 8 1.0  
45 47 46 2.0  
46 46 10 1.0  
47 49 48 2.0  
48 48 9 1.0  
END

SOLVATION

Surf Delley

Div ndiv=4

Solvent name=CRS cav0=0.0 cav1=0.0

Charged method=CONJ conv=1.00E-06 iter=300 corr

C-Mat EXACT

SCF VAR ALL

CSMRSP

END

CHARGE 0.0 3.0

UNRESTRICTED

BASIS

type TZP

core Small

createoutput None

END

XC

GGA Becke Perdew

END

RELATIVISTIC Scalar ZORA

GEOMETRY

branch New

iterations 100

END

SCF

iterations 50

mixing 0.2

diis

END

BeckeGrid

Quality Good

End

ZlmFit

Quality Normal

End

ALLPOINTS

NOPRINT LOGFILE

eor

# =====

# COSKF

# =====

```
rm -f COSKF
"\$ADFBIN/cpkf" TAPE21 COSKF COSMO
```

```
mv TAPE21 GASPHASE.t21
```

```
# COSMO-RS Solvent calculation
```

```
# =====
# The Molecule
# =====
```

```
"\$ADFBIN/adf" <<eor
TITLE metalcomplex-XII
```

```
ATOMS
```

|      |                 |                 |                 |         |
|------|-----------------|-----------------|-----------------|---------|
| 1 Cr | 0.101825870000  | -0.003777540000 | 1.046791430000  | R=1.875 |
| 2 O  | 1.377543370000  | 0.807682430000  | -0.149331940000 | R=1.72  |
| 3 O  | -1.341346240000 | 0.792147930000  | 0.047114350000  | R=1.72  |
| 4 O  | 0.026185460000  | -1.560045590000 | -0.087808450000 | R=1.72  |
| 5 O  | 2.551022640000  | 1.999468320000  | -2.073157230000 | R=1.72  |
| 6 O  | -2.889226810000 | 1.708887320000  | -1.822055330000 | R=1.72  |
| 7 O  | -0.236595830000 | -3.168778010000 | -2.103426370000 | R=1.72  |
| 8 C  | 3.696395310000  | 1.322982920000  | -0.103322540000 | R=2.00  |
| 9 C  | -2.849565830000 | 2.590393600000  | 0.380197900000  | R=2.00  |
| 10 C | -0.793010720000 | -3.775242480000 | 0.121976630000  | R=2.00  |
| 11 C | 2.591156990000  | 0.769413420000  | 0.498062830000  | R=2.00  |
| 12 C | -1.792403630000 | 1.847276220000  | 0.805811400000  | R=2.00  |
| 13 C | -0.599169670000 | -2.537046830000 | 0.651710030000  | R=2.00  |
| 14 C | 3.603735610000  | 1.969097760000  | -1.452831660000 | R=2.00  |
| 15 C | -3.503998180000 | 2.305135700000  | -0.949608150000 | R=2.00  |
| 16 C | -0.380983570000 | -4.077512390000 | -1.298465510000 | R=2.00  |
| 17 C | 2.604933430000  | 0.101767810000  | 1.855328590000  | R=2.00  |
| 18 C | -1.089105980000 | 2.114811040000  | 2.114670310000  | R=2.00  |
| 19 C | -1.024985460000 | -2.181249480000 | 2.055888320000  | R=2.00  |
| 20 C | 4.818257720000  | 2.596919170000  | -2.074186250000 | R=2.00  |
| 21 C | -4.910114150000 | 2.743874430000  | -1.251025630000 | R=2.00  |
| 22 C | -0.146073650000 | -5.484625950000 | -1.773512810000 | R=2.00  |

|      |                 |                 |                 |        |
|------|-----------------|-----------------|-----------------|--------|
| 23 O | 5.353272330000  | 0.192023950000  | 0.720284940000  | R=1.72 |
| 24 O | -3.314847430000 | 4.687711950000  | 0.568580240000  | R=1.72 |
| 25 O | -2.386433010000 | -5.210462800000 | 0.350646910000  | R=1.72 |
| 26 H | 3.587237250000  | 0.074562250000  | 2.358660820000  | R=1.30 |
| 27 H | 2.261168410000  | -0.947595950000 | 1.744266220000  | R=1.30 |
| 28 H | 1.902049720000  | 0.634801580000  | 2.528621260000  | R=1.30 |
| 29 H | -1.151439940000 | 1.210668900000  | 2.755351880000  | R=1.30 |
| 30 H | -1.513860660000 | 2.966038020000  | 2.683791630000  | R=1.30 |
| 31 H | -0.020990920000 | 2.339276350000  | 1.914313500000  | R=1.30 |
| 32 H | -0.135802400000 | -1.860219620000 | 2.637368640000  | R=1.30 |
| 33 H | -1.506058510000 | -3.017470800000 | 2.601975300000  | R=1.30 |
| 34 H | -1.748598250000 | -1.340822120000 | 2.015223300000  | R=1.30 |
| 35 H | 5.197233240000  | 3.408750100000  | -1.418538250000 | R=1.30 |
| 36 H | 4.573759990000  | 3.029222860000  | -3.068194360000 | R=1.30 |
| 37 H | 5.610523340000  | 1.830566170000  | -2.206548740000 | R=1.30 |
| 38 H | -5.611906580000 | 2.283705180000  | -0.524815760000 | R=1.30 |
| 39 H | -5.208983650000 | 2.421869490000  | -2.271725890000 | R=1.30 |
| 40 H | -4.991041610000 | 3.848840500000  | -1.202088870000 | R=1.30 |
| 41 H | 0.164401040000  | -5.489425520000 | -2.840487220000 | R=1.30 |
| 42 H | -1.074189660000 | -6.084988490000 | -1.683665080000 | R=1.30 |
| 43 H | 0.663590300000  | -5.953564920000 | -1.176752010000 | R=1.30 |
| 44 N | 5.010223760000  | 1.330343420000  | 0.506710540000  | R=1.83 |
| 45 O | 4.950286380000  | 1.904029070000  | 1.568040590000  | R=1.72 |
| 46 N | -1.420596130000 | -4.788833350000 | 0.940214280000  | R=1.83 |
| 47 O | -0.649660230000 | -5.708321630000 | 1.073224770000  | R=1.72 |
| 48 N | -3.321126870000 | 3.669979040000  | 1.218506070000  | R=1.83 |
| 49 O | -4.466743210000 | 3.446169490000  | 1.526634270000  | R=1.72 |

END

#### GUIBONDS

1 2 11 1  
2 3 12 1  
3 4 13 1  
4 5 14 2  
5 6 15 2  
6 7 16 2  
7 8 11 2  
8 8 14 1  
9 9 12 2  
10 9 15 1  
11 10 13 2  
12 10 16 1  
13 11 17 1  
14 12 18 1  
15 13 19 1  
16 14 20 1

17 15 21 1  
18 16 22 1  
19 2 1 1.0  
20 3 1 1.0  
21 4 1 1.0  
22 23 44 2.0  
23 24 48 2.0  
24 25 46 2.0  
25 26 17 1.0  
26 27 17 1.0  
27 28 17 1.0  
28 29 18 1.0  
29 30 18 1.0  
30 31 18 1.0  
31 32 19 1.0  
32 33 19 1.0  
33 34 19 1.0  
34 35 20 1.0  
35 36 20 1.0  
36 37 20 1.0  
37 38 21 1.0  
38 39 21 1.0  
39 40 21 1.0  
40 41 22 1.0  
41 42 22 1.0  
42 43 22 1.0  
43 45 44 2.0  
44 44 8 1.0  
45 47 46 2.0  
46 46 10 1.0  
47 49 48 2.0  
48 48 9 1.0  
END

SOLVATION

Surf Delley

Div ndiv=4

Solvent name=CRS cav0=0.0 cav1=0.0

Charged method=CONJ conv=1.00E-06 iter=300 corr

C-Mat EXACT

SCF VAR ALL

CSMRSP

END

CHARGE 0.0 3.0

UNRESTRICTED

BASIS

type TZP

core Small

createoutput None

END

XC

GGA Becke Perdew

END

RELATIVISTIC Scalar ZORA

RESTART GASPHASE.t21

SCF

iterations 50

mixing 0.2

diis

END

BeckeGrid

Quality Good

End

ZlmFit

Quality Normal

End

ALLPOINTS

NOPRINT LOGFILE

eor

# =====

# COSKF

# =====

rm -f COSKF

"\\${ADFBIN}/cpkf" TAPE21 COSKF COSMO

```
#!/bin/sh
```

```
# =====
```

```
# The Molecule
```

```
# =====
```

```
"$ADFBIN/adf" <<eor
```

```
TITLE metalcomplex-XIII
```

```
ATOMS
```

|      |                 |                 |                |         |
|------|-----------------|-----------------|----------------|---------|
| 1 Cr | 4.052500000000  | 10.421400000000 | 4.466000000000 | R=1.875 |
| 2 O  | 3.869200000000  | 12.367700000000 | 4.522000000000 | R=1.72  |
| 3 O  | 2.465000000000  | 10.345300000000 | 3.347800000000 | R=1.72  |
| 4 O  | 2.943400000000  | 10.305600000000 | 6.065100000000 | R=1.72  |
| 5 O  | 4.063700000000  | 8.457200000000  | 4.436700000000 | R=1.72  |
| 6 O  | 5.674800000000  | 10.545300000000 | 5.551600000000 | R=1.72  |
| 7 O  | 5.162400000000  | 10.494300000000 | 2.856900000000 | R=1.72  |
| 8 N  | 1.276600000000  | 14.995600000000 | 1.085000000000 | R=1.83  |
| 9 N  | -1.236500000000 | 8.415000000000  | 4.346700000000 | R=1.83  |
| 10 N | 10.023300000000 | 12.339300000000 | 3.115400000000 | R=1.83  |
| 11 C | 2.847800000000  | 13.065900000000 | 4.198900000000 | R=2.00  |
| 12 C | 1.709700000000  | 12.584800000000 | 3.519800000000 | R=2.00  |
| 13 C | 1.614000000000  | 11.251900000000 | 3.081200000000 | R=2.00  |
| 14 C | 2.035900000000  | 9.415300000000  | 6.249100000000 | R=2.00  |
| 15 C | 1.973600000000  | 8.199400000000  | 5.536500000000 | R=2.00  |
| 16 C | 3.026400000000  | 7.755800000000  | 4.723200000000 | R=2.00  |
| 17 C | 6.893400000000  | 10.467300000000 | 5.172900000000 | R=2.00  |
| 18 C | 7.312600000000  | 10.279800000000 | 3.848300000000 | R=2.00  |
| 19 C | 6.425500000000  | 10.359100000000 | 2.754200000000 | R=2.00  |
| 20 C | 2.930900000000  | 14.512200000000 | 4.598100000000 | R=2.00  |
| 21 H | 3.760000000000  | 14.666200000000 | 5.097700000000 | R=1.30  |
| 22 H | 2.162700000000  | 14.739800000000 | 5.161400000000 | R=1.30  |
| 23 H | 2.925400000000  | 15.073900000000 | 3.794800000000 | R=1.30  |
| 24 C | 0.600000000000  | 13.564500000000 | 3.157200000000 | R=2.00  |
| 25 H | -0.232700000000 | 13.061500000000 | 2.975900000000 | R=1.30  |
| 26 H | 0.432800000000  | 14.166600000000 | 3.924900000000 | R=1.30  |
| 27 C | 0.946100000000  | 14.364600000000 | 1.982000000000 | R=2.00  |
| 28 C | 0.445300000000  | 10.784700000000 | 2.252700000000 | R=2.00  |
| 29 H | 0.611900000000  | 9.870500000000  | 1.938700000000 | R=1.30  |
| 30 H | 0.332400000000  | 11.378600000000 | 1.481800000000 | R=1.30  |
| 31 H | -0.369300000000 | 10.799300000000 | 2.798300000000 | R=1.30  |
| 32 C | 1.024800000000  | 9.749400000000  | 7.301700000000 | R=2.00  |
| 33 H | 1.316900000000  | 10.544800000000 | 7.794300000000 | R=1.30  |
| 34 H | 0.936400000000  | 8.995300000000  | 7.921700000000 | R=1.30  |
| 35 H | 0.159400000000  | 9.927200000000  | 6.877800000000 | R=1.30  |

|      |                 |                 |                |        |
|------|-----------------|-----------------|----------------|--------|
| 36 C | 0.725000000000  | 7.344800000000  | 5.711000000000 | R=2.00 |
| 37 H | 0.906100000000  | 6.423500000000  | 5.397300000000 | R=1.30 |
| 38 H | 0.484300000000  | 7.301700000000  | 6.670300000000 | R=1.30 |
| 39 C | -0.396700000000 | 7.915400000000  | 4.945100000000 | R=2.00 |
| 40 C | 3.010000000000  | 6.369200000000  | 4.128700000000 | R=2.00 |
| 41 H | 3.846700000000  | 6.212000000000  | 3.642900000000 | R=1.30 |
| 42 H | 2.253500000000  | 6.287100000000  | 3.511400000000 | R=1.30 |
| 43 H | 2.919500000000  | 5.707700000000  | 4.845500000000 | R=1.30 |
| 44 C | 7.908800000000  | 10.619900000000 | 6.278400000000 | R=2.00 |
| 45 H | 7.454000000000  | 10.875900000000 | 7.106900000000 | R=1.30 |
| 46 H | 8.555700000000  | 11.314200000000 | 6.034500000000 | R=1.30 |
| 47 H | 8.377500000000  | 9.769300000000  | 6.411400000000 | R=1.30 |
| 48 C | 8.793400000000  | 10.073700000000 | 3.572200000000 | R=2.00 |
| 49 H | 9.207400000000  | 9.622200000000  | 4.349300000000 | R=1.30 |
| 50 H | 8.896500000000  | 9.481200000000  | 2.786100000000 | R=1.30 |
| 51 C | 9.500400000000  | 11.338600000000 | 3.317900000000 | R=2.00 |
| 52 C | 6.941900000000  | 10.314900000000 | 1.335400000000 | R=2.00 |
| 53 H | 6.197500000000  | 10.451300000000 | 0.713100000000 | R=1.30 |
| 54 H | 7.354900000000  | 9.442800000000  | 1.164600000000 | R=1.30 |
| 55 H | 7.608300000000  | 11.021500000000 | 1.208000000000 | R=1.30 |

END

#### GUIBONDS

1 1 2 1  
2 1 3 1  
3 1 4 1  
4 1 5 1  
5 1 6 1  
6 1 7 1  
7 2 11 1.0  
8 3 13 1.0  
9 4 14 1.0  
10 5 16 1.0  
11 6 17 1.0  
12 7 19 1.0  
13 8 27 3  
14 9 39 3  
15 10 51 3  
16 11 12 1.0  
17 11 20 1  
18 12 13 1.0  
19 12 24 1  
20 13 28 1  
21 14 15 1.0  
22 14 32 1  
23 15 16 1.0



24 15 36 1  
25 16 40 1  
26 17 18 1.0  
27 17 44 1  
28 18 19 1.0  
29 18 48 1  
30 19 52 1  
31 20 21 1  
32 20 22 1  
33 20 23 1  
34 24 25 1  
35 24 26 1  
36 24 27 1  
37 28 29 1  
38 28 30 1  
39 28 31 1  
40 32 33 1  
41 32 34 1  
42 32 35 1  
43 36 37 1  
44 36 38 1  
45 36 39 1  
46 40 41 1  
47 40 42 1  
48 40 43 1  
49 44 45 1  
50 44 46 1  
51 44 47 1  
52 48 49 1  
53 48 50 1  
54 48 51 1  
55 52 53 1  
56 52 54 1  
57 52 55 1  
END

SOLVATION

Surf Delley

Div ndiv=4

Solvent name=CRS cav0=0.0 cav1=0.0

Charged method=CONJ conv=1.00E-06 iter=300 corr

C-Mat EXACT

SCF VAR ALL

CSMRSP

END

CHARGE 0.0 3.0

UNRESTRICTED

BASIS

type TZP

core Small

createoutput None

END

XC

GGA Becke Perdew

END

RELATIVISTIC Scalar ZORA

GEOMETRY

branch New

iterations 100

END

SCF

iterations 50

mixing 0.2

diis

END

BeckeGrid

Quality Good

End

ZlmFit

Quality Normal

End

ALLPOINTS

NOPRINT LOGFILE

eor

# =====

# COSKF

# =====

```
rm -f COSKF
"$ADFBIN/cpkf" TAPE21 COSKF COSMO
```

```
mv TAPE21 GASPHASE.t21
```

```
# COSMO-RS Solvent calculation
```

```
# =====
# The Molecule
# =====
```

```
"$ADFBIN/adf" <<eor
TITLE metalcomplex-XIII
```

```
ATOMS
```

|      |                 |                 |                |         |
|------|-----------------|-----------------|----------------|---------|
| 1 Cr | 4.052500000000  | 10.421400000000 | 4.466000000000 | R=1.875 |
| 2 O  | 3.869200000000  | 12.367700000000 | 4.522000000000 | R=1.72  |
| 3 O  | 2.465000000000  | 10.345300000000 | 3.347800000000 | R=1.72  |
| 4 O  | 2.943400000000  | 10.305600000000 | 6.065100000000 | R=1.72  |
| 5 O  | 4.063700000000  | 8.457200000000  | 4.436700000000 | R=1.72  |
| 6 O  | 5.674800000000  | 10.545300000000 | 5.551600000000 | R=1.72  |
| 7 O  | 5.162400000000  | 10.494300000000 | 2.856900000000 | R=1.72  |
| 8 N  | 1.276600000000  | 14.995600000000 | 1.085000000000 | R=1.83  |
| 9 N  | -1.236500000000 | 8.415000000000  | 4.346700000000 | R=1.83  |
| 10 N | 10.023300000000 | 12.339300000000 | 3.115400000000 | R=1.83  |
| 11 C | 2.847800000000  | 13.065900000000 | 4.198900000000 | R=2.00  |
| 12 C | 1.709700000000  | 12.584800000000 | 3.519800000000 | R=2.00  |
| 13 C | 1.614000000000  | 11.251900000000 | 3.081200000000 | R=2.00  |
| 14 C | 2.035900000000  | 9.415300000000  | 6.249100000000 | R=2.00  |
| 15 C | 1.973600000000  | 8.199400000000  | 5.536500000000 | R=2.00  |
| 16 C | 3.026400000000  | 7.755800000000  | 4.723200000000 | R=2.00  |
| 17 C | 6.893400000000  | 10.467300000000 | 5.172900000000 | R=2.00  |
| 18 C | 7.312600000000  | 10.279800000000 | 3.848300000000 | R=2.00  |
| 19 C | 6.425500000000  | 10.359100000000 | 2.754200000000 | R=2.00  |
| 20 C | 2.930900000000  | 14.512200000000 | 4.598100000000 | R=2.00  |
| 21 H | 3.760000000000  | 14.666200000000 | 5.097700000000 | R=1.30  |
| 22 H | 2.162700000000  | 14.739800000000 | 5.161400000000 | R=1.30  |

|      |                 |                 |                |        |
|------|-----------------|-----------------|----------------|--------|
| 23 H | 2.925400000000  | 15.073900000000 | 3.794800000000 | R=1.30 |
| 24 C | 0.600000000000  | 13.564500000000 | 3.157200000000 | R=2.00 |
| 25 H | -0.232700000000 | 13.061500000000 | 2.975900000000 | R=1.30 |
| 26 H | 0.432800000000  | 14.166600000000 | 3.924900000000 | R=1.30 |
| 27 C | 0.946100000000  | 14.364600000000 | 1.982000000000 | R=2.00 |
| 28 C | 0.445300000000  | 10.784700000000 | 2.252700000000 | R=2.00 |
| 29 H | 0.611900000000  | 9.870500000000  | 1.938700000000 | R=1.30 |
| 30 H | 0.332400000000  | 11.378600000000 | 1.481800000000 | R=1.30 |
| 31 H | -0.369300000000 | 10.799300000000 | 2.798300000000 | R=1.30 |
| 32 C | 1.024800000000  | 9.749400000000  | 7.301700000000 | R=2.00 |
| 33 H | 1.316900000000  | 10.544800000000 | 7.794300000000 | R=1.30 |
| 34 H | 0.936400000000  | 8.995300000000  | 7.921700000000 | R=1.30 |
| 35 H | 0.159400000000  | 9.927200000000  | 6.877800000000 | R=1.30 |
| 36 C | 0.725000000000  | 7.344800000000  | 5.711000000000 | R=2.00 |
| 37 H | 0.906100000000  | 6.423500000000  | 5.397300000000 | R=1.30 |
| 38 H | 0.484300000000  | 7.301700000000  | 6.670300000000 | R=1.30 |
| 39 C | -0.396700000000 | 7.915400000000  | 4.945100000000 | R=2.00 |
| 40 C | 3.010000000000  | 6.369200000000  | 4.128700000000 | R=2.00 |
| 41 H | 3.846700000000  | 6.212000000000  | 3.642900000000 | R=1.30 |
| 42 H | 2.253500000000  | 6.287100000000  | 3.511400000000 | R=1.30 |
| 43 H | 2.919500000000  | 5.707700000000  | 4.845500000000 | R=1.30 |
| 44 C | 7.908800000000  | 10.619900000000 | 6.278400000000 | R=2.00 |
| 45 H | 7.454000000000  | 10.875900000000 | 7.106900000000 | R=1.30 |
| 46 H | 8.555700000000  | 11.314200000000 | 6.034500000000 | R=1.30 |
| 47 H | 8.377500000000  | 9.769300000000  | 6.411400000000 | R=1.30 |
| 48 C | 8.793400000000  | 10.073700000000 | 3.572200000000 | R=2.00 |
| 49 H | 9.207400000000  | 9.622200000000  | 4.349300000000 | R=1.30 |
| 50 H | 8.896500000000  | 9.481200000000  | 2.786100000000 | R=1.30 |
| 51 C | 9.500400000000  | 11.338600000000 | 3.317900000000 | R=2.00 |
| 52 C | 6.941900000000  | 10.314900000000 | 1.335400000000 | R=2.00 |
| 53 H | 6.197500000000  | 10.451300000000 | 0.713100000000 | R=1.30 |
| 54 H | 7.354900000000  | 9.442800000000  | 1.164600000000 | R=1.30 |
| 55 H | 7.608300000000  | 11.021500000000 | 1.208000000000 | R=1.30 |

END

#### GUIBONDS

1 1 2 1  
2 1 3 1  
3 1 4 1  
4 1 5 1  
5 1 6 1  
6 1 7 1  
7 2 11 1.0  
8 3 13 1.0  
9 4 14 1.0  
10 5 16 1.0

11 6 17 1.0  
12 7 19 1.0  
13 8 27 3  
14 9 39 3  
15 10 51 3  
16 11 12 1.0  
17 11 20 1  
18 12 13 1.0  
19 12 24 1  
20 13 28 1  
21 14 15 1.0  
22 14 32 1  
23 15 16 1.0  
24 15 36 1  
25 16 40 1  
26 17 18 1.0  
27 17 44 1  
28 18 19 1.0  
29 18 48 1  
30 19 52 1  
31 20 21 1  
32 20 22 1  
33 20 23 1  
34 24 25 1  
35 24 26 1  
36 24 27 1  
37 28 29 1  
38 28 30 1  
39 28 31 1  
40 32 33 1  
41 32 34 1  
42 32 35 1  
43 36 37 1  
44 36 38 1  
45 36 39 1  
46 40 41 1  
47 40 42 1  
48 40 43 1  
49 44 45 1  
50 44 46 1  
51 44 47 1  
52 48 49 1  
53 48 50 1  
54 48 51 1  
55 52 53 1  
56 52 54 1

57 52 55 1  
END

SOLVATION

Surf Delley  
Div ndiv=4  
Solvent name=CRS cav0=0.0 cav1=0.0  
Charged method=CONJ conv=1.00E-06 iter=300 corr  
C-Mat EXACT  
SCF VAR ALL  
CSMRSP

END

CHARGE 0.0 3.0

UNRESTRICTED

BASIS

type TZP  
core Small  
createoutput None  
END

XC

GGA Becke Perdew  
END

RELATIVISTIC Scalar ZORA

RESTART GASPHASE.t21

SCF

iterations 50  
mixing 0.2  
diis  
END

BeckeGrid

Quality Good  
End

ZlmFit

Quality Normal

End

ALLPOINTS  
NOPRINT LOGFILE

eor

# =====  
# COSKF  
# =====

rm -f COSKF  
"\$ADFBIN/cpkf" TAPE21 COSKF COSMO

#!/bin/sh

# =====  
# The Molecule  
# =====

"\$ADFBIN/adf" <<eor

TITLE metalcomplex-XIV

ATOMS

|      |                 |                 |                 |         |
|------|-----------------|-----------------|-----------------|---------|
| 1 Cr | -0.120016780000 | 0.218683650000  | 1.214387160000  | R=1.875 |
| 2 O  | 1.193496080000  | 1.347879440000  | 0.364126030000  | R=1.72  |
| 3 O  | -1.474441120000 | 0.903353220000  | 0.026973970000  | R=1.72  |
| 4 O  | 0.261330340000  | -1.194583320000 | -0.041543720000 | R=1.72  |
| 5 O  | 2.553447250000  | 3.015258750000  | -1.137606580000 | R=1.72  |
| 6 O  | -3.140199730000 | 1.493753720000  | -1.930889670000 | R=1.72  |
| 7 O  | 1.189337320000  | -2.793187780000 | -1.923574930000 | R=1.72  |
| 8 C  | 3.556334750000  | 1.416935100000  | 0.267870000000  | R=2.00  |
| 9 C  | -3.296493630000 | 2.394778600000  | 0.247488720000  | R=2.00  |
| 10 C | -0.156948740000 | -3.520749630000 | -0.123936000000 | R=2.00  |
| 11 C | 2.424070690000  | 0.923374560000  | 0.811010000000  | R=2.00  |
| 12 C | -2.237129450000 | 1.757969790000  | 0.786243310000  | R=2.00  |
| 13 C | -0.303770990000 | -2.329422160000 | 0.489792400000  | R=2.00  |
| 14 C | 3.584611250000  | 2.444176150000  | -0.811959950000 | R=2.00  |
| 15 C | -3.732293720000 | 2.238530860000  | -1.163801670000 | R=2.00  |
| 16 C | 0.611472470000  | -3.722022160000 | -1.378565280000 | R=2.00  |
| 17 H | 3.846373480000  | -1.409821720000 | 0.851825660000  | R=1.30  |

|      |                 |                 |                 |        |
|------|-----------------|-----------------|-----------------|--------|
| 18 C | -1.865844450000 | 1.973391870000  | 2.227152680000  | R=2.00 |
| 19 C | -1.097712830000 | -2.218278750000 | 1.761798420000  | R=2.00 |
| 20 H | 4.186415400000  | 4.817176270000  | -2.009049570000 | R=1.30 |
| 21 C | -4.920349560000 | 3.006965790000  | -1.655976430000 | R=2.00 |
| 22 C | 0.681446740000  | -5.089681990000 | -1.985855620000 | R=2.00 |
| 23 H | 4.507371120000  | 1.071960070000  | 0.662748100000  | R=1.30 |
| 24 H | -3.878929780000 | 3.068480260000  | 0.870607310000  | R=1.30 |
| 25 H | -0.622439650000 | -4.399940190000 | 0.313994910000  | R=1.30 |
| 26 H | 1.289545300000  | -5.077108680000 | -2.915644730000 | R=1.30 |
| 27 H | -0.342348400000 | -5.440686720000 | -2.233215500000 | R=1.30 |
| 28 H | 1.145075230000  | -5.795033490000 | -1.264765080000 | R=1.30 |
| 29 H | -1.885445140000 | 1.001538670000  | 2.763013400000  | R=1.30 |
| 30 H | -2.562013440000 | 2.670897240000  | 2.740244020000  | R=1.30 |
| 31 H | -0.841770280000 | 2.397267330000  | 2.282920220000  | R=1.30 |
| 32 H | -0.445527320000 | -1.836269740000 | 2.572680120000  | R=1.30 |
| 33 H | -1.516095210000 | -3.196323550000 | 2.082444950000  | R=1.30 |
| 34 H | -1.939186590000 | -1.510753580000 | 1.610491910000  | R=1.30 |
| 35 H | 1.256971920000  | -0.672227980000 | 5.020614060000  | R=1.30 |
| 36 H | 2.638405340000  | -2.713440920000 | 4.755721260000  | R=1.30 |
| 37 H | 3.932469360000  | -3.073946730000 | 2.672420510000  | R=1.30 |
| 38 H | -5.815664230000 | 2.732150350000  | -1.059902470000 | R=1.30 |
| 39 H | -5.119652990000 | 2.781256080000  | -2.725504190000 | R=1.30 |
| 40 H | -4.730542620000 | 4.095597310000  | -1.549830840000 | R=1.30 |
| 41 C | 2.496823020000  | -0.077201980000 | 1.900174200000  | R=2.00 |
| 42 C | 1.766702950000  | 0.118698150000  | 3.083565060000  | R=2.00 |
| 43 C | 1.821802350000  | -0.828439930000 | 4.110736160000  | R=2.00 |
| 44 C | 2.600662510000  | -1.979066820000 | 3.961655450000  | R=2.00 |
| 45 C | 3.331059460000  | -2.181521420000 | 2.787637780000  | R=2.00 |
| 46 C | 3.283975760000  | -1.233935070000 | 1.760621190000  | R=2.00 |
| 47 H | 1.161081340000  | 1.006869180000  | 3.213788320000  | R=1.30 |
| 48 C | 4.858359400000  | 2.821947160000  | -1.481664820000 | R=2.00 |
| 49 C | 5.934540650000  | 1.917051630000  | -1.573484050000 | R=2.00 |
| 50 C | 7.122869560000  | 2.291814420000  | -2.208533470000 | R=2.00 |
| 51 C | 7.250048600000  | 3.566520980000  | -2.764082370000 | R=2.00 |
| 52 C | 6.186623080000  | 4.468260010000  | -2.691511540000 | R=2.00 |
| 53 C | 4.995882120000  | 4.099285690000  | -2.058452290000 | R=2.00 |
| 54 H | 5.855929030000  | 0.913252580000  | -1.178069170000 | R=1.30 |
| 55 H | 7.944335190000  | 1.590095660000  | -2.275190270000 | R=1.30 |
| 56 H | 8.170807690000  | 3.853796730000  | -3.255156970000 | R=1.30 |
| 57 H | 6.284680490000  | 5.454952650000  | -3.125568500000 | R=1.30 |

END

#### GUIBONDS

1 2 11 1

2 3 12 1

3 4 13 1



4 5 14 2  
5 6 15 2  
6 7 16 2  
7 8 11 2  
8 8 14 1  
9 9 12 2  
10 9 15 1  
11 10 13 2  
12 10 16 1  
13 17 46 1.0  
14 12 18 1  
15 13 19 1  
16 20 53 1.0  
17 15 21 1  
18 16 22 1  
19 2 1 1.0  
20 3 1 1.0  
21 4 1 1.0  
22 23 8 1.0  
23 24 9 1.0  
24 25 10 1.0  
25 26 22 1.0  
26 27 22 1.0  
27 28 22 1.0  
28 29 18 1.0  
29 30 18 1.0  
30 31 18 1.0  
31 32 19 1.0  
32 33 19 1.0  
33 34 19 1.0  
34 36 44 1.0  
35 37 45 1.0  
36 41 11 1  
37 38 21 1.0  
38 39 21 1.0  
39 40 21 1.0  
40 41 42 1.5  
41 42 43 1.5  
42 43 44 1.5  
43 44 45 1.5  
44 45 46 1.5  
45 46 41 1.5  
46 47 42 1.0  
47 35 43 1.0  
48 48 49 1.5  
49 49 50 1.5

50 50 51 1.5  
51 51 52 1.5  
52 52 53 1.5  
53 53 48 1.5  
54 54 49 1.0  
55 55 50 1.0  
56 56 51 1.0  
57 57 52 1.0  
58 48 14 1  
END

SOLVATION

Surf Delley  
Div ndiv=4  
Solvent name=CRS cav0=0.0 cav1=0.0  
Charged method=CONJ conv=1.00E-06 iter=300 corr  
C-Mat EXACT  
SCF VAR ALL  
CSMRSP

END

CHARGE 0.0 3.0

UNRESTRICTED

BASIS

type TZP  
core Small  
createoutput None  
END

XC

GGA Becke Perdew  
END

RELATIVISTIC Scalar ZORA

GEOMETRY

branch New  
iterations 100  
END

SCF

iterations 50

```
mixing 0.2
diis
END
```

```
BeckeGrid
  Quality Good
End
```

```
ZlmFit
  Quality Normal
End
```

```
ALLPOINTS
NOPRINT LOGFILE
```

```
eor
```

```
# =====
# COSKF
# =====
```

```
rm -f COSKF
"\$ADFBIN/cpkf" TAPE21 COSKF COSMO
```

```
mv TAPE21 GASPHASE.t21
```

```
# COSMO-RS Solvent calculation
```

```
# =====
# The Molecule
# =====
```

```
"\$ADFBIN/adf" <<eor
TITLE metalcomplex-XIV
```

```
ATOMS
1 Cr   -0.120016780000   0.218683650000   1.214387160000   R=1.875
```

|      |                 |                 |                 |        |
|------|-----------------|-----------------|-----------------|--------|
| 2 O  | 1.193496080000  | 1.347879440000  | 0.364126030000  | R=1.72 |
| 3 O  | -1.474441120000 | 0.903353220000  | 0.026973970000  | R=1.72 |
| 4 O  | 0.261330340000  | -1.194583320000 | -0.041543720000 | R=1.72 |
| 5 O  | 2.553447250000  | 3.015258750000  | -1.137606580000 | R=1.72 |
| 6 O  | -3.140199730000 | 1.493753720000  | -1.930889670000 | R=1.72 |
| 7 O  | 1.189337320000  | -2.793187780000 | -1.923574930000 | R=1.72 |
| 8 C  | 3.556334750000  | 1.416935100000  | 0.267870000000  | R=2.00 |
| 9 C  | -3.296493630000 | 2.394778600000  | 0.247488720000  | R=2.00 |
| 10 C | -0.156948740000 | -3.520749630000 | -0.123936000000 | R=2.00 |
| 11 C | 2.424070690000  | 0.923374560000  | 0.811010000000  | R=2.00 |
| 12 C | -2.237129450000 | 1.757969790000  | 0.786243310000  | R=2.00 |
| 13 C | -0.303770990000 | -2.329422160000 | 0.489792400000  | R=2.00 |
| 14 C | 3.584611250000  | 2.444176150000  | -0.811959950000 | R=2.00 |
| 15 C | -3.732293720000 | 2.238530860000  | -1.163801670000 | R=2.00 |
| 16 C | 0.611472470000  | -3.722022160000 | -1.378565280000 | R=2.00 |
| 17 H | 3.846373480000  | -1.409821720000 | 0.851825660000  | R=1.30 |
| 18 C | -1.865844450000 | 1.973391870000  | 2.227152680000  | R=2.00 |
| 19 C | -1.097712830000 | -2.218278750000 | 1.761798420000  | R=2.00 |
| 20 H | 4.186415400000  | 4.817176270000  | -2.009049570000 | R=1.30 |
| 21 C | -4.920349560000 | 3.006965790000  | -1.655976430000 | R=2.00 |
| 22 C | 0.681446740000  | -5.089681990000 | -1.985855620000 | R=2.00 |
| 23 H | 4.507371120000  | 1.071960070000  | 0.662748100000  | R=1.30 |
| 24 H | -3.878929780000 | 3.068480260000  | 0.870607310000  | R=1.30 |
| 25 H | -0.622439650000 | -4.399940190000 | 0.313994910000  | R=1.30 |
| 26 H | 1.289545300000  | -5.077108680000 | -2.915644730000 | R=1.30 |
| 27 H | -0.342348400000 | -5.440686720000 | -2.233215500000 | R=1.30 |
| 28 H | 1.145075230000  | -5.795033490000 | -1.264765080000 | R=1.30 |
| 29 H | -1.885445140000 | 1.001538670000  | 2.763013400000  | R=1.30 |
| 30 H | -2.562013440000 | 2.670897240000  | 2.740244020000  | R=1.30 |
| 31 H | -0.841770280000 | 2.397267330000  | 2.282920220000  | R=1.30 |
| 32 H | -0.445527320000 | -1.836269740000 | 2.572680120000  | R=1.30 |
| 33 H | -1.516095210000 | -3.196323550000 | 2.082444950000  | R=1.30 |
| 34 H | -1.939186590000 | -1.510753580000 | 1.610491910000  | R=1.30 |
| 35 H | 1.256971920000  | -0.672227980000 | 5.020614060000  | R=1.30 |
| 36 H | 2.638405340000  | -2.713440920000 | 4.755721260000  | R=1.30 |
| 37 H | 3.932469360000  | -3.073946730000 | 2.672420510000  | R=1.30 |
| 38 H | -5.815664230000 | 2.732150350000  | -1.059902470000 | R=1.30 |
| 39 H | -5.119652990000 | 2.781256080000  | -2.725504190000 | R=1.30 |
| 40 H | -4.730542620000 | 4.095597310000  | -1.549830840000 | R=1.30 |
| 41 C | 2.496823020000  | -0.077201980000 | 1.900174200000  | R=2.00 |
| 42 C | 1.766702950000  | 0.118698150000  | 3.083565060000  | R=2.00 |
| 43 C | 1.821802350000  | -0.828439930000 | 4.110736160000  | R=2.00 |
| 44 C | 2.600662510000  | -1.979066820000 | 3.961655450000  | R=2.00 |
| 45 C | 3.331059460000  | -2.181521420000 | 2.787637780000  | R=2.00 |
| 46 C | 3.283975760000  | -1.233935070000 | 1.760621190000  | R=2.00 |
| 47 H | 1.161081340000  | 1.006869180000  | 3.213788320000  | R=1.30 |

|      |                |                |                 |        |
|------|----------------|----------------|-----------------|--------|
| 48 C | 4.858359400000 | 2.821947160000 | -1.481664820000 | R=2.00 |
| 49 C | 5.934540650000 | 1.917051630000 | -1.573484050000 | R=2.00 |
| 50 C | 7.122869560000 | 2.291814420000 | -2.208533470000 | R=2.00 |
| 51 C | 7.250048600000 | 3.566520980000 | -2.764082370000 | R=2.00 |
| 52 C | 6.186623080000 | 4.468260010000 | -2.691511540000 | R=2.00 |
| 53 C | 4.995882120000 | 4.099285690000 | -2.058452290000 | R=2.00 |
| 54 H | 5.855929030000 | 0.913252580000 | -1.178069170000 | R=1.30 |
| 55 H | 7.944335190000 | 1.590095660000 | -2.275190270000 | R=1.30 |
| 56 H | 8.170807690000 | 3.853796730000 | -3.255156970000 | R=1.30 |
| 57 H | 6.284680490000 | 5.454952650000 | -3.125568500000 | R=1.30 |

END

#### GUIBONDS

1 2 11 1  
2 3 12 1  
3 4 13 1  
4 5 14 2  
5 6 15 2  
6 7 16 2  
7 8 11 2  
8 8 14 1  
9 9 12 2  
10 9 15 1  
11 10 13 2  
12 10 16 1  
13 17 46 1.0  
14 12 18 1  
15 13 19 1  
16 20 53 1.0  
17 15 21 1  
18 16 22 1  
19 2 1 1.0  
20 3 1 1.0  
21 4 1 1.0  
22 23 8 1.0  
23 24 9 1.0  
24 25 10 1.0  
25 26 22 1.0  
26 27 22 1.0  
27 28 22 1.0  
28 29 18 1.0  
29 30 18 1.0  
30 31 18 1.0  
31 32 19 1.0  
32 33 19 1.0  
33 34 19 1.0

34 36 44 1.0  
35 37 45 1.0  
36 41 11 1  
37 38 21 1.0  
38 39 21 1.0  
39 40 21 1.0  
40 41 42 1.5  
41 42 43 1.5  
42 43 44 1.5  
43 44 45 1.5  
44 45 46 1.5  
45 46 41 1.5  
46 47 42 1.0  
47 35 43 1.0  
48 48 49 1.5  
49 49 50 1.5  
50 50 51 1.5  
51 51 52 1.5  
52 52 53 1.5  
53 53 48 1.5  
54 54 49 1.0  
55 55 50 1.0  
56 56 51 1.0  
57 57 52 1.0  
58 48 14 1  
END

SOLVATION

Surf Delley

Div ndiv=4

Solvent name=CRS cav0=0.0 cav1=0.0

Charged method=CONJ conv=1.00E-06 iter=300 corr

C-Mat EXACT

SCF VAR ALL

CSMRSP

END

CHARGE 0.0 3.0

UNRESTRICTED

BASIS

type TZP

core Small

createoutput None

END

```
XC
GGA Becke Perdew
END
```

```
RELATIVISTIC Scalar ZORA
```

```
RESTART GASPHASE.t21
```

```
SCF
iterations 50
mixing 0.2
diis
END
```

```
BeckeGrid
  Quality Good
End
```

```
ZlmFit
  Quality Normal
End
```

```
ALLPOINTS
NOPRINT LOGFILE
```

```
eor
```

```
# =====
# COSKF
# =====
```

```
rm -f COSKF
"$ADFBIN/cpkf" TAPE21 COSKF COSMO
```

```
#!/bin/sh
```

```
# =====
# The Molecule
# =====
```

```
"$ADFBIN/adf" <<eor
```

## TITLE metalcomplex-XV

## ATOMS

|      |                 |                 |                |         |
|------|-----------------|-----------------|----------------|---------|
| 1 Cr | 5.442700000000  | 5.213800000000  | 4.321900000000 | R=1.875 |
| 2 O  | 6.472800000000  | 6.691800000000  | 5.092500000000 | R=1.72  |
| 3 O  | 3.948700000000  | 6.424900000000  | 3.985400000000 | R=1.72  |
| 4 O  | 6.222300000000  | 5.717500000000  | 2.607400000000 | R=1.72  |
| 5 O  | 4.421400000000  | 3.805200000000  | 3.447800000000 | R=1.72  |
| 6 O  | 6.930900000000  | 3.973200000000  | 4.635000000000 | R=1.72  |
| 7 O  | 4.666100000000  | 4.764800000000  | 6.065100000000 | R=1.72  |
| 8 C  | 6.240800000000  | 7.937700000000  | 4.896800000000 | R=2.00  |
| 9 C  | 5.094700000000  | 8.470700000000  | 4.296700000000 | R=2.00  |
| 10 H | 5.057100000000  | 9.410400000000  | 4.159700000000 | R=1.30  |
| 11 C | 3.996100000000  | 7.697700000000  | 3.885600000000 | R=2.00  |
| 12 C | 5.780300000000  | 5.429800000000  | 1.442200000000 | R=2.00  |
| 13 C | 4.688300000000  | 4.571500000000  | 1.207500000000 | R=2.00  |
| 14 H | 4.328200000000  | 4.531300000000  | 0.329400000000 | R=1.30  |
| 15 C | 4.105700000000  | 3.774700000000  | 2.199800000000 | R=2.00  |
| 16 C | 7.086800000000  | 3.197400000000  | 5.628800000000 | R=2.00  |
| 17 C | 6.241600000000  | 3.131300000000  | 6.743000000000 | R=2.00  |
| 18 H | 6.464200000000  | 2.514600000000  | 7.431200000000 | R=1.30  |
| 19 C | 5.098000000000  | 3.907200000000  | 6.912900000000 | R=2.00  |
| 20 C | 7.326000000000  | 8.854000000000  | 5.347800000000 | R=2.00  |
| 21 C | 8.656400000000  | 8.489200000000  | 5.111000000000 | R=2.00  |
| 22 H | 8.852100000000  | 7.662700000000  | 4.685000000000 | R=1.30  |
| 23 C | 9.692200000000  | 9.333400000000  | 5.496900000000 | R=2.00  |
| 24 H | 10.593500000000 | 9.092800000000  | 5.316000000000 | R=1.30  |
| 25 C | 9.409600000000  | 10.530700000000 | 6.147900000000 | R=2.00  |
| 26 H | 10.119000000000 | 11.103000000000 | 6.415300000000 | R=1.30  |
| 27 C | 8.090100000000  | 10.892800000000 | 6.407500000000 | R=2.00  |
| 28 H | 7.898700000000  | 11.703000000000 | 6.865600000000 | R=1.30  |
| 29 C | 7.054200000000  | 10.063800000000 | 5.994100000000 | R=2.00  |
| 30 H | 6.153000000000  | 10.321600000000 | 6.151200000000 | R=1.30  |
| 31 C | 2.782400000000  | 8.329600000000  | 3.286600000000 | R=2.00  |
| 32 C | 2.651700000000  | 9.710500000000  | 3.104000000000 | R=2.00  |
| 33 H | 3.350500000000  | 10.290300000000 | 3.384200000000 | R=1.30  |
| 34 C | 1.509600000000  | 10.244000000000 | 2.515500000000 | R=2.00  |
| 35 H | 1.430800000000  | 11.184000000000 | 2.398800000000 | R=1.30  |
| 36 C | 0.486200000000  | 9.408600000000  | 2.099700000000 | R=2.00  |
| 37 H | -0.291200000000 | 9.772600000000  | 1.694200000000 | R=1.30  |
| 38 C | 0.601500000000  | 8.033700000000  | 2.278900000000 | R=2.00  |
| 39 H | -0.100300000000 | 7.459100000000  | 1.997100000000 | R=1.30  |
| 40 C | 1.737900000000  | 7.496700000000  | 2.867800000000 | R=2.00  |
| 41 H | 1.807000000000  | 6.556800000000  | 2.988100000000 | R=1.30  |
| 42 C | 6.536300000000  | 6.028800000000  | 0.310500000000 | R=2.00  |



|      |                |                |                 |        |
|------|----------------|----------------|-----------------|--------|
| 43 C | 7.421700000000 | 7.082000000000 | 0.570000000000  | R=2.00 |
| 44 H | 7.482600000000 | 7.443600000000 | 1.446800000000  | R=1.30 |
| 45 C | 8.210400000000 | 7.600800000000 | -0.448800000000 | R=2.00 |
| 46 H | 8.798100000000 | 8.325700000000 | -0.271000000000 | R=1.30 |
| 47 C | 8.141300000000 | 7.061600000000 | -1.729900000000 | R=2.00 |
| 48 H | 8.703800000000 | 7.398700000000 | -2.416900000000 | R=1.30 |
| 49 C | 7.250800000000 | 6.031000000000 | -2.004200000000 | R=2.00 |
| 50 H | 7.193800000000 | 5.672300000000 | -2.882400000000 | R=1.30 |
| 51 C | 6.442700000000 | 5.525200000000 | -0.991100000000 | R=2.00 |
| 52 H | 5.822000000000 | 4.832200000000 | -1.184100000000 | R=1.30 |
| 53 C | 3.057000000000 | 2.774600000000 | 1.845700000000  | R=2.00 |
| 54 C | 2.813300000000 | 2.361400000000 | 0.531200000000  | R=2.00 |
| 55 H | 3.323000000000 | 2.729700000000 | -0.180700000000 | R=1.30 |
| 56 C | 1.833500000000 | 1.418900000000 | 0.259300000000  | R=2.00 |
| 57 H | 1.676700000000 | 1.144300000000 | -0.636500000000 | R=1.30 |
| 58 C | 1.078000000000 | 0.873700000000 | 1.295700000000  | R=2.00 |
| 59 H | 0.404400000000 | 0.230400000000 | 1.107700000000  | R=1.30 |
| 60 C | 1.314400000000 | 1.275600000000 | 2.605700000000  | R=2.00 |
| 61 H | 0.797400000000 | 0.909300000000 | 3.313300000000  | R=1.30 |
| 62 C | 2.302600000000 | 2.210800000000 | 2.882600000000  | R=2.00 |
| 63 H | 2.467900000000 | 2.470300000000 | 3.781600000000  | R=1.30 |
| 64 C | 8.275500000000 | 2.275700000000 | 5.583800000000  | R=2.00 |
| 65 H | 8.791300000000 | 2.448400000000 | 4.768400000000  | R=1.30 |
| 66 H | 7.967700000000 | 1.345200000000 | 5.585600000000  | R=1.30 |
| 67 H | 8.840800000000 | 2.433500000000 | 6.368000000000  | R=1.30 |
| 68 C | 4.295600000000 | 3.779300000000 | 8.176900000000  | R=2.00 |
| 69 H | 4.418300000000 | 4.582600000000 | 8.723800000000  | R=1.30 |
| 70 H | 4.598000000000 | 2.993500000000 | 8.677900000000  | R=1.30 |
| 71 H | 3.347300000000 | 3.678100000000 | 7.952400000000  | R=1.30 |

END

#### GUIBONDS

1 1 2 1  
2 1 3 1  
3 1 4 1  
4 1 5 1  
5 1 6 1  
6 1 7 1  
7 2 8 1.0  
8 3 11 1.0  
9 4 12 1.0  
10 5 15 1.0  
11 6 16 1.0  
12 7 19 1.0  
13 8 9 1.0  
14 8 20 1

15 9 10 1  
16 9 11 1.0  
17 11 31 1  
18 12 13 1.0  
19 12 42 1  
20 13 14 1  
21 13 15 1.0  
22 15 53 1  
23 16 17 1.0  
24 16 64 1  
25 17 18 1  
26 17 19 1.0  
27 19 68 1  
28 20 21 1.5  
29 20 29 1.5  
30 21 22 1  
31 21 23 1.5  
32 23 24 1  
33 23 25 1.5  
34 25 26 1  
35 25 27 1.5  
36 27 28 1  
37 27 29 1.5  
38 29 30 1  
39 31 32 1.5  
40 31 40 1.5  
41 32 33 1  
42 32 34 1.5  
43 34 35 1  
44 34 36 1.5  
45 36 37 1  
46 36 38 1.5  
47 38 39 1  
48 38 40 1.5  
49 40 41 1  
50 42 43 1.5  
51 42 51 1.5  
52 43 44 1  
53 43 45 1.5  
54 45 46 1  
55 45 47 1.5  
56 47 48 1  
57 47 49 1.5  
58 49 50 1  
59 49 51 1.5  
60 51 52 1

61 53 54 1.5  
62 53 62 1.5  
63 54 55 1  
64 54 56 1.5  
65 56 57 1  
66 56 58 1.5  
67 58 59 1  
68 58 60 1.5  
69 60 61 1  
70 60 62 1.5  
71 62 63 1  
72 64 65 1  
73 64 66 1  
74 64 67 1  
75 68 69 1  
76 68 70 1  
77 68 71 1  
END

SOLVATION

Surf Delley  
Div ndiv=4  
Solvent name=CRS cav0=0.0 cav1=0.0  
Charged method=CONJ conv=1.00E-06 iter=300 corr  
C-Mat EXACT  
SCF VAR ALL  
CSMRSP

END

CHARGE 0.0 3.0

UNRESTRICTED

BASIS

type TZP  
core Small  
createoutput None  
END

XC

GGA Becke Perdew  
END

RELATIVISTIC Scalar ZORA

```
GEOMETRY
  branch New
  iterations 100
END
```

```
SCF
iterations 50
mixing 0.2
diis
END
```

```
BeckeGrid
  Quality Good
End
```

```
ZlmFit
  Quality Normal
End
```

```
ALLPOINTS
NOPRINT LOGFILE
```

```
eor
```

```
# =====
# COSKF
# =====
```

```
rm -f COSKF
"$ADFBIN/cpkf" TAPE21 COSKF COSMO
```

```
mv TAPE21 GASPHASE.t21
```

```
# COSMO-RS Solvent calculation
```

```
# =====
```

# The Molecule

# =====

"\$ADFBIN/adf" <<eor

TITLE metalcomplex-XV

ATOMS

|      |                 |                 |                |         |
|------|-----------------|-----------------|----------------|---------|
| 1 Cr | 5.442700000000  | 5.213800000000  | 4.321900000000 | R=1.875 |
| 2 O  | 6.472800000000  | 6.691800000000  | 5.092500000000 | R=1.72  |
| 3 O  | 3.948700000000  | 6.424900000000  | 3.985400000000 | R=1.72  |
| 4 O  | 6.222300000000  | 5.717500000000  | 2.607400000000 | R=1.72  |
| 5 O  | 4.421400000000  | 3.805200000000  | 3.447800000000 | R=1.72  |
| 6 O  | 6.930900000000  | 3.973200000000  | 4.635000000000 | R=1.72  |
| 7 O  | 4.666100000000  | 4.764800000000  | 6.065100000000 | R=1.72  |
| 8 C  | 6.240800000000  | 7.937700000000  | 4.896800000000 | R=2.00  |
| 9 C  | 5.094700000000  | 8.470700000000  | 4.296700000000 | R=2.00  |
| 10 H | 5.057100000000  | 9.410400000000  | 4.159700000000 | R=1.30  |
| 11 C | 3.996100000000  | 7.697700000000  | 3.885600000000 | R=2.00  |
| 12 C | 5.780300000000  | 5.429800000000  | 1.442200000000 | R=2.00  |
| 13 C | 4.688300000000  | 4.571500000000  | 1.207500000000 | R=2.00  |
| 14 H | 4.328200000000  | 4.531300000000  | 0.329400000000 | R=1.30  |
| 15 C | 4.105700000000  | 3.774700000000  | 2.199800000000 | R=2.00  |
| 16 C | 7.086800000000  | 3.197400000000  | 5.628800000000 | R=2.00  |
| 17 C | 6.241600000000  | 3.131300000000  | 6.743000000000 | R=2.00  |
| 18 H | 6.464200000000  | 2.514600000000  | 7.431200000000 | R=1.30  |
| 19 C | 5.098000000000  | 3.907200000000  | 6.912900000000 | R=2.00  |
| 20 C | 7.326000000000  | 8.854000000000  | 5.347800000000 | R=2.00  |
| 21 C | 8.656400000000  | 8.489200000000  | 5.111000000000 | R=2.00  |
| 22 H | 8.852100000000  | 7.662700000000  | 4.685000000000 | R=1.30  |
| 23 C | 9.692200000000  | 9.333400000000  | 5.496900000000 | R=2.00  |
| 24 H | 10.593500000000 | 9.092800000000  | 5.316000000000 | R=1.30  |
| 25 C | 9.409600000000  | 10.530700000000 | 6.147900000000 | R=2.00  |
| 26 H | 10.119000000000 | 11.103000000000 | 6.415300000000 | R=1.30  |
| 27 C | 8.090100000000  | 10.892800000000 | 6.407500000000 | R=2.00  |
| 28 H | 7.898700000000  | 11.703000000000 | 6.865600000000 | R=1.30  |
| 29 C | 7.054200000000  | 10.063800000000 | 5.994100000000 | R=2.00  |
| 30 H | 6.153000000000  | 10.321600000000 | 6.151200000000 | R=1.30  |
| 31 C | 2.782400000000  | 8.329600000000  | 3.286600000000 | R=2.00  |
| 32 C | 2.651700000000  | 9.710500000000  | 3.104000000000 | R=2.00  |
| 33 H | 3.350500000000  | 10.290300000000 | 3.384200000000 | R=1.30  |
| 34 C | 1.509600000000  | 10.244000000000 | 2.515500000000 | R=2.00  |
| 35 H | 1.430800000000  | 11.184000000000 | 2.398800000000 | R=1.30  |
| 36 C | 0.486200000000  | 9.408600000000  | 2.099700000000 | R=2.00  |
| 37 H | -0.291200000000 | 9.772600000000  | 1.694200000000 | R=1.30  |
| 38 C | 0.601500000000  | 8.033700000000  | 2.278900000000 | R=2.00  |
| 39 H | -0.100300000000 | 7.459100000000  | 1.997100000000 | R=1.30  |

|      |                |                |                 |        |
|------|----------------|----------------|-----------------|--------|
| 40 C | 1.737900000000 | 7.496700000000 | 2.867800000000  | R=2.00 |
| 41 H | 1.807000000000 | 6.556800000000 | 2.988100000000  | R=1.30 |
| 42 C | 6.536300000000 | 6.028800000000 | 0.310500000000  | R=2.00 |
| 43 C | 7.421700000000 | 7.082000000000 | 0.570000000000  | R=2.00 |
| 44 H | 7.482600000000 | 7.443600000000 | 1.446800000000  | R=1.30 |
| 45 C | 8.210400000000 | 7.600800000000 | -0.448800000000 | R=2.00 |
| 46 H | 8.798100000000 | 8.325700000000 | -0.271000000000 | R=1.30 |
| 47 C | 8.141300000000 | 7.061600000000 | -1.729900000000 | R=2.00 |
| 48 H | 8.703800000000 | 7.398700000000 | -2.416900000000 | R=1.30 |
| 49 C | 7.250800000000 | 6.031000000000 | -2.004200000000 | R=2.00 |
| 50 H | 7.193800000000 | 5.672300000000 | -2.882400000000 | R=1.30 |
| 51 C | 6.442700000000 | 5.525200000000 | -0.991100000000 | R=2.00 |
| 52 H | 5.822000000000 | 4.832200000000 | -1.184100000000 | R=1.30 |
| 53 C | 3.057000000000 | 2.774600000000 | 1.845700000000  | R=2.00 |
| 54 C | 2.813300000000 | 2.361400000000 | 0.531200000000  | R=2.00 |
| 55 H | 3.323000000000 | 2.729700000000 | -0.180700000000 | R=1.30 |
| 56 C | 1.833500000000 | 1.418900000000 | 0.259300000000  | R=2.00 |
| 57 H | 1.676700000000 | 1.144300000000 | -0.636500000000 | R=1.30 |
| 58 C | 1.078000000000 | 0.873700000000 | 1.295700000000  | R=2.00 |
| 59 H | 0.404400000000 | 0.230400000000 | 1.107700000000  | R=1.30 |
| 60 C | 1.314400000000 | 1.275600000000 | 2.605700000000  | R=2.00 |
| 61 H | 0.797400000000 | 0.909300000000 | 3.313300000000  | R=1.30 |
| 62 C | 2.302600000000 | 2.210800000000 | 2.882600000000  | R=2.00 |
| 63 H | 2.467900000000 | 2.470300000000 | 3.781600000000  | R=1.30 |
| 64 C | 8.275500000000 | 2.275700000000 | 5.583800000000  | R=2.00 |
| 65 H | 8.791300000000 | 2.448400000000 | 4.768400000000  | R=1.30 |
| 66 H | 7.967700000000 | 1.345200000000 | 5.585600000000  | R=1.30 |
| 67 H | 8.840800000000 | 2.433500000000 | 6.368000000000  | R=1.30 |
| 68 C | 4.295600000000 | 3.779300000000 | 8.176900000000  | R=2.00 |
| 69 H | 4.418300000000 | 4.582600000000 | 8.723800000000  | R=1.30 |
| 70 H | 4.598000000000 | 2.993500000000 | 8.677900000000  | R=1.30 |
| 71 H | 3.347300000000 | 3.678100000000 | 7.952400000000  | R=1.30 |
| END  |                |                |                 |        |

#### GUIBONDS

1 1 2 1  
2 1 3 1  
3 1 4 1  
4 1 5 1  
5 1 6 1  
6 1 7 1  
7 2 8 1.0  
8 3 11 1.0  
9 4 12 1.0  
10 5 15 1.0  
11 6 16 1.0

12 7 19 1.0  
13 8 9 1.0  
14 8 20 1  
15 9 10 1  
16 9 11 1.0  
17 11 31 1  
18 12 13 1.0  
19 12 42 1  
20 13 14 1  
21 13 15 1.0  
22 15 53 1  
23 16 17 1.0  
24 16 64 1  
25 17 18 1  
26 17 19 1.0  
27 19 68 1  
28 20 21 1.5  
29 20 29 1.5  
30 21 22 1  
31 21 23 1.5  
32 23 24 1  
33 23 25 1.5  
34 25 26 1  
35 25 27 1.5  
36 27 28 1  
37 27 29 1.5  
38 29 30 1  
39 31 32 1.5  
40 31 40 1.5  
41 32 33 1  
42 32 34 1.5  
43 34 35 1  
44 34 36 1.5  
45 36 37 1  
46 36 38 1.5  
47 38 39 1  
48 38 40 1.5  
49 40 41 1  
50 42 43 1.5  
51 42 51 1.5  
52 43 44 1  
53 43 45 1.5  
54 45 46 1  
55 45 47 1.5  
56 47 48 1  
57 47 49 1.5

58 49 50 1  
59 49 51 1.5  
60 51 52 1  
61 53 54 1.5  
62 53 62 1.5  
63 54 55 1  
64 54 56 1.5  
65 56 57 1  
66 56 58 1.5  
67 58 59 1  
68 58 60 1.5  
69 60 61 1  
70 60 62 1.5  
71 62 63 1  
72 64 65 1  
73 64 66 1  
74 64 67 1  
75 68 69 1  
76 68 70 1  
77 68 71 1  
END

SOLVATION

Surf Delley

Div ndiv=4

Solvent name=CRS cav0=0.0 cav1=0.0

Charged method=CONJ conv=1.00E-06 iter=300 corr

C-Mat EXACT

SCF VAR ALL

CSMRSP

END

CHARGE 0.0 3.0

UNRESTRICTED

BASIS

type TZP

core Small

createoutput None

END

XC

GGA Becke Perdew

END



RELATIVISTIC Scalar ZORA

RESTART GASPHASE.t21

SCF  
iterations 50  
mixing 0.2  
diis  
END

BeckeGrid  
Quality Good  
End

ZlmFit  
Quality Normal  
End

ALLPOINTS  
NOPRINT LOGFILE

eor

# =====  
# COSKF  
# =====

rm -f COSKF  
"\$ADFBIN/cpkf" TAPE21 COSKF COSMO

#!/bin/sh

# =====  
# The Molecule  
# =====

"\$ADFBIN/adf" <<eor

TITLE metalcomplex-XVI

ATOMS

|      |                 |                 |                 |         |
|------|-----------------|-----------------|-----------------|---------|
| 1 Cr | 5.404708962000  | 5.317945223000  | 4.158835943000  | R=1.875 |
| 2 O  | 6.515571041000  | 6.742376401000  | 4.941486573000  | R=1.72  |
| 3 O  | 3.950466140000  | 6.595765812000  | 3.794226930000  | R=1.72  |
| 4 O  | 6.192674788000  | 5.707148508000  | 2.394644695000  | R=1.72  |
| 5 O  | 4.296424338000  | 3.882334046000  | 3.394787193000  | R=1.72  |
| 6 O  | 6.866266740000  | 4.031103980000  | 4.495941080000  | R=1.72  |
| 7 O  | 4.600993703000  | 4.950438337000  | 5.926684360000  | R=1.72  |
| 8 C  | 6.263358931000  | 8.012756006000  | 4.956415383000  | R=2.00  |
| 9 C  | 5.080868090000  | 8.595615774000  | 4.464193676000  | R=2.00  |
| 10 H | 5.013515068000  | 9.679029457000  | 4.470712599000  | R=1.30  |
| 11 C | 3.990969789000  | 7.883283349000  | 3.932291808000  | R=2.00  |
| 12 C | 5.854736940000  | 5.188290750000  | 1.256756293000  | R=2.00  |
| 13 C | 4.889295672000  | 4.177864328000  | 1.095398301000  | R=2.00  |
| 14 H | 4.649914290000  | 3.870162415000  | 0.082062034770  | R=1.30  |
| 15 C | 4.177854913000  | 3.567095314000  | 2.144197398000  | R=2.00  |
| 16 C | 7.027778753000  | 3.304152014000  | 5.552942636000  | R=2.00  |
| 17 C | 6.175361594000  | 3.309094683000  | 6.669859848000  | R=2.00  |
| 18 H | 6.426221607000  | 2.644450381000  | 7.494294282000  | R=1.30  |
| 19 C | 5.028454692000  | 4.108482784000  | 6.809925215000  | R=2.00  |
| 20 C | 7.341334276000  | 8.867967860000  | 5.535577510000  | R=2.00  |
| 21 C | 8.639963691000  | 8.336734561000  | 5.660788300000  | R=2.00  |
| 22 H | 8.827404454000  | 7.317458658000  | 5.324602839000  | R=1.30  |
| 23 C | 9.673292112000  | 9.104291134000  | 6.198190810000  | R=2.00  |
| 24 H | 10.675942990000 | 8.681930292000  | 6.280469334000  | R=1.30  |
| 25 C | 9.425652284000  | 10.412389950000 | 6.630896717000  | R=2.00  |
| 26 H | 10.232563290000 | 11.011622070000 | 7.055469390000  | R=1.30  |
| 27 C | 8.136757702000  | 10.947013500000 | 6.521755204000  | R=2.00  |
| 28 H | 7.933471798000  | 11.961278100000 | 6.868116561000  | R=1.30  |
| 29 C | 7.102870928000  | 10.183857030000 | 5.977051617000  | R=2.00  |
| 30 H | 6.102628343000  | 10.612700390000 | 5.921864065000  | R=1.30  |
| 31 C | 2.774661441000  | 8.609803959000  | 3.462638938000  | R=2.00  |
| 32 C | 2.448419932000  | 9.903382138000  | 3.913197902000  | R=2.00  |
| 33 H | 3.077554257000  | 10.406581480000 | 4.647337062000  | R=1.30  |
| 34 C | 1.297206136000  | 10.543886420000 | 3.451577000000  | R=2.00  |
| 35 H | 1.051171534000  | 11.541630870000 | 3.817745551000  | R=1.30  |
| 36 C | 0.458171350300  | 9.907820069000  | 2.529293093000  | R=2.00  |
| 37 H | -0.438941421200 | 10.412502990000 | 2.167480587000  | R=1.30  |
| 38 C | 0.772310319200  | 8.620782724000  | 2.076940278000  | R=2.00  |
| 39 H | 0.122933670600  | 8.120599838000  | 1.356772705000  | R=1.30  |
| 40 C | 1.916637406000  | 7.974596225000  | 2.544319811000  | R=2.00  |
| 41 H | 2.167006168000  | 6.973266888000  | 2.195298716000  | R=1.30  |
| 42 C | 6.557140912000  | 5.752690816000  | 0.066926822030  | R=2.00  |
| 43 C | 7.155239208000  | 7.023586042000  | 0.168543960400  | R=2.00  |
| 44 H | 7.083292522000  | 7.566286265000  | 1.110617877000  | R=1.30  |
| 45 C | 7.816628748000  | 7.586503230000  | -0.922896395100 | R=2.00  |
| 46 H | 8.265152986000  | 8.577018492000  | -0.832915530100 | R=1.30  |

|      |                 |                 |                 |        |
|------|-----------------|-----------------|-----------------|--------|
| 47 C | 7.903250404000  | 6.884155895000  | -2.130835626000 | R=2.00 |
| 48 H | 8.423987732000  | 7.322646263000  | -2.983573749000 | R=1.30 |
| 49 C | 7.323160420000  | 5.614985432000  | -2.239329752000 | R=2.00 |
| 50 H | 7.398262158000  | 5.056687045000  | -3.173505888000 | R=1.30 |
| 51 C | 6.652173715000  | 5.053613469000  | -1.151727475000 | R=2.00 |
| 52 H | 6.225997722000  | 4.055352557000  | -1.249667758000 | R=1.30 |
| 53 C | 3.190919113000  | 2.485816818000  | 1.852937009000  | R=2.00 |
| 54 C | 3.242286643000  | 1.719217808000  | 0.672822874600  | R=2.00 |
| 55 H | 4.029993630000  | 1.888962477000  | -0.061148248240 | R=1.30 |
| 56 C | 2.307068695000  | 0.708356193500  | 0.444549628800  | R=2.00 |
| 57 H | 2.366281874000  | 0.114368423600  | -0.468602271400 | R=1.30 |
| 58 C | 1.301728688000  | 0.452952989300  | 1.384154784000  | R=2.00 |
| 59 H | 0.569615861900  | -0.335224010900 | 1.201568394000  | R=1.30 |
| 60 C | 1.242849943000  | 1.208588255000  | 2.561243463000  | R=2.00 |
| 61 H | 0.460589776000  | 1.014927598000  | 3.296877656000  | R=1.30 |
| 62 C | 2.183132657000  | 2.211353051000  | 2.797333981000  | R=2.00 |
| 63 H | 2.143651169000  | 2.800943198000  | 3.712833568000  | R=1.30 |
| 64 H | 9.677709286000  | 3.984589688000  | 5.546467141000  | R=1.30 |
| 65 H | 11.649431450000 | 2.496611783000  | 5.509208567000  | R=1.30 |
| 66 H | 9.071525899000  | -0.918411854700 | 5.470724263000  | R=1.30 |
| 67 H | 11.346339780000 | 0.045111133360  | 5.471337115000  | R=1.30 |
| 68 H | 5.605101256000  | 2.805273410000  | 9.145368054000  | R=1.30 |
| 69 C | 8.256884484000  | 2.376596265000  | 5.529716887000  | R=2.00 |
| 70 C | 8.085067289000  | 0.986885485200  | 5.508248258000  | R=2.00 |
| 71 C | 9.202800440000  | 0.143378118700  | 5.487127068000  | R=2.00 |
| 72 C | 10.492350680000 | 0.689581622400  | 5.487474488000  | R=2.00 |
| 73 C | 10.664167810000 | 2.079292371000  | 5.508943117000  | R=2.00 |
| 74 C | 9.546434710000  | 2.922799716000  | 5.530064317000  | R=2.00 |
| 75 H | 7.099803641000  | 0.569566093200  | 5.507982798000  | R=1.30 |
| 76 C | 4.181963014000  | 4.018719150000  | 8.093277983000  | R=2.00 |
| 77 C | 2.938832982000  | 4.660324789000  | 8.158454899000  | R=2.00 |
| 78 C | 2.169044251000  | 4.578694863000  | 9.325519612000  | R=2.00 |
| 79 C | 2.642385624000  | 3.855459286000  | 10.427407290000 | R=2.00 |
| 80 C | 3.885515629000  | 3.213853683000  | 10.362230320000 | R=2.00 |
| 81 C | 4.655304345000  | 3.295483608000  | 9.195165659000  | R=2.00 |
| 82 H | 2.577182908000  | 5.212903219000  | 7.316572303000  | R=1.30 |
| 83 H | 1.219247347000  | 5.068905064000  | 9.375317256000  | R=1.30 |
| 84 H | 2.054238864000  | 3.793090998000  | 11.319087500000 | R=1.30 |
| 85 H | 4.247165717000  | 2.661275241000  | 11.204112900000 | R=1.30 |
| END  |                 |                 |                 |        |

#### GUIBONDS

1 1 2 1.0

2 1 3 1.0

3 1 4 1.0

4 1 5 1.0

5 1 6 1.0  
6 1 7 1.0  
7 2 8 1.0  
8 3 11 1.0  
9 4 12 1.0  
10 5 15 1.0  
11 6 16 1.0  
12 7 19 1.0  
13 8 9 1.0  
14 8 20 1.0  
15 9 10 1.0  
16 9 11 1.0  
17 11 31 1.0  
18 12 13 1.0  
19 12 42 1.0  
20 13 14 1.0  
21 13 15 1.0  
22 15 53 1.0  
23 16 17 1.0  
24 64 74 1.0  
25 17 18 1.0  
26 17 19 1.0  
27 68 81 1.0  
28 20 21 1.5  
29 20 29 1.5  
30 21 22 1.0  
31 21 23 1.5  
32 23 24 1.0  
33 23 25 1.5  
34 25 26 1.0  
35 25 27 1.5  
36 27 28 1.0  
37 27 29 1.5  
38 29 30 1.0  
39 31 32 1.5  
40 31 40 1.5  
41 32 33 1.0  
42 32 34 1.5  
43 34 35 1.0  
44 34 36 1.5  
45 36 37 1.0  
46 36 38 1.5  
47 38 39 1.0  
48 38 40 1.5  
49 40 41 1.0  
50 42 43 1.5

51 42 51 1.5  
52 43 44 1.0  
53 43 45 1.5  
54 45 46 1.0  
55 45 47 1.5  
56 47 48 1.0  
57 47 49 1.5  
58 49 50 1.0  
59 49 51 1.5  
60 51 52 1.0  
61 53 54 1.5  
62 53 62 1.5  
63 54 55 1.0  
64 54 56 1.5  
65 56 57 1.0  
66 56 58 1.5  
67 58 59 1.0  
68 58 60 1.5  
69 60 61 1.0  
70 60 62 1.5  
71 62 63 1.0  
72 69 16 1.0  
73 67 72 1.0  
74 65 73 1.0  
75 69 70 1.5  
76 70 71 1.5  
77 71 72 1.5  
78 72 73 1.5  
79 73 74 1.5  
80 74 69 1.5  
81 75 70 1.0  
82 66 71 1.0  
83 76 77 1.5  
84 77 78 1.5  
85 78 79 1.5  
86 79 80 1.5  
87 80 81 1.5  
88 81 76 1.5  
89 82 77 1.0  
90 83 78 1.0  
91 84 79 1.0  
92 85 80 1.0  
93 76 19 1.0  
END

SOLVATION

Surf Delley  
Div ndiv=4  
Solvent name=CRS cav0=0.0 cav1=0.0  
Charged method=CONJ conv=1.00E-06 iter=300 corr  
C-Mat EXACT  
SCF VAR ALL  
CSMRSP  
END

CHARGE 0.0 3.0

UNRESTRICTED

BASIS  
type TZP  
core Small  
createoutput None  
END

XC  
GGA Becke Perdew  
END

RELATIVISTIC Scalar ZORA

GEOMETRY  
branch New  
iterations 100  
END

SCF  
iterations 50  
mixing 0.2  
diis  
END

BeckeGrid  
Quality Good  
End

ZlmFit  
Quality Normal  
End

ALLPOINTS  
NOPRINT LOGFILE

eor

# =====  
# COSKF  
# =====

rm -f COSKF  
"\$ADFBIN/cpkf" TAPE21 COSKF COSMO

mv TAPE21 GASPHASE.t21

# COSMO-RS Solvent calculation

# =====  
# The Molecule  
# =====

"\$ADFBIN/adf" <<eor  
TITLE metalcomplex-XVI

ATOMS

|      |                |                |                |         |
|------|----------------|----------------|----------------|---------|
| 1 Cr | 5.404708962000 | 5.317945223000 | 4.158835943000 | R=1.875 |
| 2 O  | 6.515571041000 | 6.742376401000 | 4.941486573000 | R=1.72  |
| 3 O  | 3.950466140000 | 6.595765812000 | 3.794226930000 | R=1.72  |
| 4 O  | 6.192674788000 | 5.707148508000 | 2.394644695000 | R=1.72  |
| 5 O  | 4.296424338000 | 3.882334046000 | 3.394787193000 | R=1.72  |
| 6 O  | 6.866266740000 | 4.031103980000 | 4.495941080000 | R=1.72  |
| 7 O  | 4.600993703000 | 4.950438337000 | 5.926684360000 | R=1.72  |
| 8 C  | 6.263358931000 | 8.012756006000 | 4.956415383000 | R=2.00  |
| 9 C  | 5.080868090000 | 8.595615774000 | 4.464193676000 | R=2.00  |
| 10 H | 5.013515068000 | 9.679029457000 | 4.470712599000 | R=1.30  |
| 11 C | 3.990969789000 | 7.883283349000 | 3.932291808000 | R=2.00  |
| 12 C | 5.854736940000 | 5.188290750000 | 1.256756293000 | R=2.00  |
| 13 C | 4.889295672000 | 4.177864328000 | 1.095398301000 | R=2.00  |

|      |                 |                 |                 |        |
|------|-----------------|-----------------|-----------------|--------|
| 14 H | 4.649914290000  | 3.870162415000  | 0.082062034770  | R=1.30 |
| 15 C | 4.177854913000  | 3.567095314000  | 2.144197398000  | R=2.00 |
| 16 C | 7.027778753000  | 3.304152014000  | 5.552942636000  | R=2.00 |
| 17 C | 6.175361594000  | 3.309094683000  | 6.669859848000  | R=2.00 |
| 18 H | 6.426221607000  | 2.644450381000  | 7.494294282000  | R=1.30 |
| 19 C | 5.028454692000  | 4.108482784000  | 6.809925215000  | R=2.00 |
| 20 C | 7.341334276000  | 8.867967860000  | 5.535577510000  | R=2.00 |
| 21 C | 8.639963691000  | 8.336734561000  | 5.660788300000  | R=2.00 |
| 22 H | 8.827404454000  | 7.317458658000  | 5.324602839000  | R=1.30 |
| 23 C | 9.673292112000  | 9.104291134000  | 6.198190810000  | R=2.00 |
| 24 H | 10.675942990000 | 8.681930292000  | 6.280469334000  | R=1.30 |
| 25 C | 9.425652284000  | 10.412389950000 | 6.630896717000  | R=2.00 |
| 26 H | 10.232563290000 | 11.011622070000 | 7.055469390000  | R=1.30 |
| 27 C | 8.136757702000  | 10.947013500000 | 6.521755204000  | R=2.00 |
| 28 H | 7.933471798000  | 11.961278100000 | 6.868116561000  | R=1.30 |
| 29 C | 7.102870928000  | 10.183857030000 | 5.977051617000  | R=2.00 |
| 30 H | 6.102628343000  | 10.612700390000 | 5.921864065000  | R=1.30 |
| 31 C | 2.774661441000  | 8.609803959000  | 3.462638938000  | R=2.00 |
| 32 C | 2.448419932000  | 9.903382138000  | 3.913197902000  | R=2.00 |
| 33 H | 3.077554257000  | 10.406581480000 | 4.647337062000  | R=1.30 |
| 34 C | 1.297206136000  | 10.543886420000 | 3.451577000000  | R=2.00 |
| 35 H | 1.051171534000  | 11.541630870000 | 3.817745551000  | R=1.30 |
| 36 C | 0.458171350300  | 9.907820069000  | 2.529293093000  | R=2.00 |
| 37 H | -0.438941421200 | 10.412502990000 | 2.167480587000  | R=1.30 |
| 38 C | 0.772310319200  | 8.620782724000  | 2.076940278000  | R=2.00 |
| 39 H | 0.122933670600  | 8.120599838000  | 1.356772705000  | R=1.30 |
| 40 C | 1.916637406000  | 7.974596225000  | 2.544319811000  | R=2.00 |
| 41 H | 2.167006168000  | 6.973266888000  | 2.195298716000  | R=1.30 |
| 42 C | 6.557140912000  | 5.752690816000  | 0.066926822030  | R=2.00 |
| 43 C | 7.155239208000  | 7.023586042000  | 0.168543960400  | R=2.00 |
| 44 H | 7.083292522000  | 7.566286265000  | 1.110617877000  | R=1.30 |
| 45 C | 7.816628748000  | 7.586503230000  | -0.922896395100 | R=2.00 |
| 46 H | 8.265152986000  | 8.577018492000  | -0.832915530100 | R=1.30 |
| 47 C | 7.903250404000  | 6.884155895000  | -2.130835626000 | R=2.00 |
| 48 H | 8.423987732000  | 7.322646263000  | -2.983573749000 | R=1.30 |
| 49 C | 7.323160420000  | 5.614985432000  | -2.239329752000 | R=2.00 |
| 50 H | 7.398262158000  | 5.056687045000  | -3.173505888000 | R=1.30 |
| 51 C | 6.652173715000  | 5.053613469000  | -1.151727475000 | R=2.00 |
| 52 H | 6.225997722000  | 4.055352557000  | -1.249667758000 | R=1.30 |
| 53 C | 3.190919113000  | 2.485816818000  | 1.852937009000  | R=2.00 |
| 54 C | 3.242286643000  | 1.719217808000  | 0.672822874600  | R=2.00 |
| 55 H | 4.029993630000  | 1.888962477000  | -0.061148248240 | R=1.30 |
| 56 C | 2.307068695000  | 0.708356193500  | 0.444549628800  | R=2.00 |
| 57 H | 2.366281874000  | 0.114368423600  | -0.468602271400 | R=1.30 |
| 58 C | 1.301728688000  | 0.452952989300  | 1.384154784000  | R=2.00 |
| 59 H | 0.569615861900  | -0.335224010900 | 1.201568394000  | R=1.30 |



|      |                 |                 |                 |        |
|------|-----------------|-----------------|-----------------|--------|
| 60 C | 1.242849943000  | 1.208588255000  | 2.561243463000  | R=2.00 |
| 61 H | 0.460589776000  | 1.014927598000  | 3.296877656000  | R=1.30 |
| 62 C | 2.183132657000  | 2.211353051000  | 2.797333981000  | R=2.00 |
| 63 H | 2.143651169000  | 2.800943198000  | 3.712833568000  | R=1.30 |
| 64 H | 9.677709286000  | 3.984589688000  | 5.546467141000  | R=1.30 |
| 65 H | 11.649431450000 | 2.496611783000  | 5.509208567000  | R=1.30 |
| 66 H | 9.071525899000  | -0.918411854700 | 5.470724263000  | R=1.30 |
| 67 H | 11.346339780000 | 0.045111133360  | 5.471337115000  | R=1.30 |
| 68 H | 5.605101256000  | 2.805273410000  | 9.145368054000  | R=1.30 |
| 69 C | 8.256884484000  | 2.376596265000  | 5.529716887000  | R=2.00 |
| 70 C | 8.085067289000  | 0.986885485200  | 5.508248258000  | R=2.00 |
| 71 C | 9.202800440000  | 0.143378118700  | 5.487127068000  | R=2.00 |
| 72 C | 10.492350680000 | 0.689581622400  | 5.487474488000  | R=2.00 |
| 73 C | 10.664167810000 | 2.079292371000  | 5.508943117000  | R=2.00 |
| 74 C | 9.546434710000  | 2.922799716000  | 5.530064317000  | R=2.00 |
| 75 H | 7.099803641000  | 0.569566093200  | 5.507982798000  | R=1.30 |
| 76 C | 4.181963014000  | 4.018719150000  | 8.093277983000  | R=2.00 |
| 77 C | 2.938832982000  | 4.660324789000  | 8.158454899000  | R=2.00 |
| 78 C | 2.169044251000  | 4.578694863000  | 9.325519612000  | R=2.00 |
| 79 C | 2.642385624000  | 3.855459286000  | 10.427407290000 | R=2.00 |
| 80 C | 3.885515629000  | 3.213853683000  | 10.362230320000 | R=2.00 |
| 81 C | 4.655304345000  | 3.295483608000  | 9.195165659000  | R=2.00 |
| 82 H | 2.577182908000  | 5.212903219000  | 7.316572303000  | R=1.30 |
| 83 H | 1.219247347000  | 5.068905064000  | 9.375317256000  | R=1.30 |
| 84 H | 2.054238864000  | 3.793090998000  | 11.319087500000 | R=1.30 |
| 85 H | 4.247165717000  | 2.661275241000  | 11.204112900000 | R=1.30 |

END

#### GUIBONDS

1 1 2 1.0  
2 1 3 1.0  
3 1 4 1.0  
4 1 5 1.0  
5 1 6 1.0  
6 1 7 1.0  
7 2 8 1.0  
8 3 11 1.0  
9 4 12 1.0  
10 5 15 1.0  
11 6 16 1.0  
12 7 19 1.0  
13 8 9 1.0  
14 8 20 1.0  
15 9 10 1.0  
16 9 11 1.0  
17 11 31 1.0

18 12 13 1.0  
19 12 42 1.0  
20 13 14 1.0  
21 13 15 1.0  
22 15 53 1.0  
23 16 17 1.0  
24 64 74 1.0  
25 17 18 1.0  
26 17 19 1.0  
27 68 81 1.0  
28 20 21 1.5  
29 20 29 1.5  
30 21 22 1.0  
31 21 23 1.5  
32 23 24 1.0  
33 23 25 1.5  
34 25 26 1.0  
35 25 27 1.5  
36 27 28 1.0  
37 27 29 1.5  
38 29 30 1.0  
39 31 32 1.5  
40 31 40 1.5  
41 32 33 1.0  
42 32 34 1.5  
43 34 35 1.0  
44 34 36 1.5  
45 36 37 1.0  
46 36 38 1.5  
47 38 39 1.0  
48 38 40 1.5  
49 40 41 1.0  
50 42 43 1.5  
51 42 51 1.5  
52 43 44 1.0  
53 43 45 1.5  
54 45 46 1.0  
55 45 47 1.5  
56 47 48 1.0  
57 47 49 1.5  
58 49 50 1.0  
59 49 51 1.5  
60 51 52 1.0  
61 53 54 1.5  
62 53 62 1.5  
63 54 55 1.0

64 54 56 1.5  
65 56 57 1.0  
66 56 58 1.5  
67 58 59 1.0  
68 58 60 1.5  
69 60 61 1.0  
70 60 62 1.5  
71 62 63 1.0  
72 69 16 1.0  
73 67 72 1.0  
74 65 73 1.0  
75 69 70 1.5  
76 70 71 1.5  
77 71 72 1.5  
78 72 73 1.5  
79 73 74 1.5  
80 74 69 1.5  
81 75 70 1.0  
82 66 71 1.0  
83 76 77 1.5  
84 77 78 1.5  
85 78 79 1.5  
86 79 80 1.5  
87 80 81 1.5  
88 81 76 1.5  
89 82 77 1.0  
90 83 78 1.0  
91 84 79 1.0  
92 85 80 1.0  
93 76 19 1.0  
END

SOLVATION

Surf Delley

Div ndiv=4

Solvent name=CRS cav0=0.0 cav1=0.0

Charged method=CONJ conv=1.00E-06 iter=300 corr

C-Mat EXACT

SCF VAR ALL

CSMRSP

END

CHARGE 0.0 3.0

UNRESTRICTED

BASIS  
type TZP  
core Small  
createoutput None  
END

XC  
GGA Becke Perdew  
END

RELATIVISTIC Scalar ZORA

RESTART GASPHASE.t21

SCF  
iterations 50  
mixing 0.2  
diis  
END

BeckeGrid  
Quality Good  
End

ZlmFit  
Quality Normal  
End

ALLPOINTS  
NOPRINT LOGFILE

eor

# =====  
# COSKF  
# =====

rm -f COSKF  
"\$SADFBIN/cpkf" TAPE21 COSKF COSMO

```
#!/bin/sh
```

```
# =====  
# The Molecule  
# =====
```

```
"$ADFBIN/adf" <<eor
```

```
TITLE c6h12
```

```
ATOMS
```

```
1 C  -1.271148401000  -0.733897871500  0.228393178100  R=2.00  
2 C   0.000000000000  1.467795743000  0.228393178100  R=2.00  
3 C  -1.271148401000  0.733897871500  -0.228393178100  R=2.00  
4 C   0.000000000000  -1.467795743000  -0.228393178100  R=2.00  
5 C   1.271148401000  -0.733897871500  0.228393178100  R=2.00  
6 C   1.271148401000  0.733897871500  -0.228393178100  R=2.00  
7 H  -1.331796392000  -0.768913005500  1.330251475000  R=1.30  
8 H   0.000000000000  1.537826011000  1.330251475000  R=1.30  
9 H   0.000000000000  2.500482470000  -0.154056756700  R=1.30  
10 H  -1.331796392000  0.768913005500  -1.330251475000  R=1.30  
11 H  -2.165481341000  1.250241235000  0.154056756700  R=1.30  
12 H   0.000000000000  -1.537826011000  -1.330251475000  R=1.30  
13 H   0.000000000000  -2.500482470000  0.154056756700  R=1.30  
14 H   2.165481341000  -1.250241235000  -0.154056756700  R=1.30  
15 H   1.331796392000  -0.768913005500  1.330251475000  R=1.30  
16 H   1.331796392000  0.768913005500  -1.330251475000  R=1.30  
17 H   2.165481341000  1.250241235000  0.154056756700  R=1.30  
18 H  -2.165481341000  -1.250241235000  -0.154056756700  R=1.30  
END
```

```
GUIBONDS
```

```
1 2 3 1.0  
2 3 1 1.0  
3 1 4 1.0  
4 4 5 1.0  
5 5 6 1.0  
6 6 2 1.0  
7 7 1 1.0  
8 8 2 1.0  
9 9 2 1.0  
10 10 3 1.0  
11 11 3 1.0  
12 12 4 1.0  
13 13 4 1.0  
14 14 5 1.0
```

15 15 5 1.0  
16 16 6 1.0  
17 17 6 1.0  
18 18 1 1.0  
END

SOLVATION

Surf Delley  
Div ndiv=4  
Solvent name=CRS cav0=0.0 cav1=0.0  
Charged method=CONJ conv=1.00E-06 iter=300 corr  
C-Mat EXACT  
SCF VAR ALL  
CSMRSP

END

BASIS

type TZP  
core Small  
createoutput None  
END

XC

GGA Becke Perdew  
END

RELATIVISTIC Scalar ZORA

GEOMETRY

branch New  
iterations 100

END

SCF

iterations 50  
mixing 0.2  
diis  
END

BeckeGrid

Quality Good  
End

ZlmFit  
Quality Normal  
End

ALLPOINTS  
NOPRINT LOGFILE

eor

# =====  
# COSKF  
# =====

rm -f COSKF  
"\$ADFBIN/cpkf" TAPE21 COSKF COSMO

mv TAPE21 GASPHASE.t21

# COSMO-RS Solvent calculation

# =====  
# The Molecule  
# =====

"\$ADFBIN/adf" -n \$NPROC <<eor  
TITLE c6h12

ATOMS

|      |                 |                 |                 |        |
|------|-----------------|-----------------|-----------------|--------|
| 1 C  | -1.271148401000 | -0.733897871500 | 0.228393178100  | R=2.00 |
| 2 C  | 0.000000000000  | 1.467795743000  | 0.228393178100  | R=2.00 |
| 3 C  | -1.271148401000 | 0.733897871500  | -0.228393178100 | R=2.00 |
| 4 C  | 0.000000000000  | -1.467795743000 | -0.228393178100 | R=2.00 |
| 5 C  | 1.271148401000  | -0.733897871500 | 0.228393178100  | R=2.00 |
| 6 C  | 1.271148401000  | 0.733897871500  | -0.228393178100 | R=2.00 |
| 7 H  | -1.331796392000 | -0.768913005500 | 1.330251475000  | R=1.30 |
| 8 H  | 0.000000000000  | 1.537826011000  | 1.330251475000  | R=1.30 |
| 9 H  | 0.000000000000  | 2.500482470000  | -0.154056756700 | R=1.30 |
| 10 H | -1.331796392000 | 0.768913005500  | -1.330251475000 | R=1.30 |
| 11 H | -2.165481341000 | 1.250241235000  | 0.154056756700  | R=1.30 |
| 12 H | 0.000000000000  | -1.537826011000 | -1.330251475000 | R=1.30 |
| 13 H | 0.000000000000  | -2.500482470000 | 0.154056756700  | R=1.30 |
| 14 H | 2.165481341000  | -1.250241235000 | -0.154056756700 | R=1.30 |
| 15 H | 1.331796392000  | -0.768913005500 | 1.330251475000  | R=1.30 |
| 16 H | 1.331796392000  | 0.768913005500  | -1.330251475000 | R=1.30 |

17 H 2.165481341000 1.250241235000 0.154056756700 R=1.30  
18 H -2.165481341000 -1.250241235000 -0.154056756700 R=1.30  
END

GUIBONDS

1 2 3 1.0  
2 3 1 1.0  
3 1 4 1.0  
4 4 5 1.0  
5 5 6 1.0  
6 6 2 1.0  
7 7 1 1.0  
8 8 2 1.0  
9 9 2 1.0  
10 10 3 1.0  
11 11 3 1.0  
12 12 4 1.0  
13 13 4 1.0  
14 14 5 1.0  
15 15 5 1.0  
16 16 6 1.0  
17 17 6 1.0  
18 18 1 1.0  
END

SOLVATION

Surf Delley  
Div ndiv=4  
Solvent name=CRS cav0=0.0 cav1=0.0  
Charged method=CONJ conv=1.00E-06 iter=300 corr  
C-Mat EXACT  
SCF VAR ALL  
CSMRSP  
END

BASIS

type TZP  
core Small  
createoutput None  
END

XC

GGA Becke Perdew  
END

RELATIVISTIC Scalar ZORA



RESTART GASPHASE.t21

SCF  
iterations 50  
mixing 0.2  
diis  
END

BeckeGrid  
Quality Good  
End

ZlmFit  
Quality Normal  
End

ALLPOINTS  
NOPRINT LOGFILE

eor

# =====  
# COSKF  
# =====

rm -f COSKF  
"\$ADFBIN/cpkf" TAPE21 COSKF COSMO

#!/bin/sh

# =====  
# The Molecule  
# =====

"\$ADFBIN/adf" <<eor  
TITLE diisoprpylether

ATOMS  
1 O 3.422807717000 0.083829617500 -0.563716205700 R=1.72  
2 C 2.732659265000 0.194620471000 0.710499924400 R=2.00

|      |                |                 |                 |        |
|------|----------------|-----------------|-----------------|--------|
| 3 C  | 4.871556336000 | 0.040509950590  | -0.457309842800 | R=2.00 |
| 4 C  | 1.384337351000 | 0.847227703400  | 0.429201274700  | R=2.00 |
| 5 C  | 2.586487974000 | -1.178235677000 | 1.369701997000  | R=2.00 |
| 6 C  | 5.448462710000 | 1.450769287000  | -0.317478565600 | R=2.00 |
| 7 C  | 5.385819791000 | -0.671322315100 | -1.702969643000 | R=2.00 |
| 8 H  | 3.318930092000 | 0.854996567100  | 1.372865071000  | R=1.30 |
| 9 H  | 5.141991406000 | -0.553645938200 | 0.432938178000  | R=1.30 |
| 10 H | 5.099682911000 | -0.114842691000 | -2.607920569000 | R=1.30 |
| 11 H | 4.973358386000 | -1.686944501000 | -1.771344368000 | R=1.30 |
| 12 H | 6.481996717000 | -0.740991540200 | -1.676644662000 | R=1.30 |
| 13 H | 6.541502910000 | 1.406967464000  | -0.206592878000 | R=1.30 |
| 14 H | 5.042569704000 | 1.965964814000  | 0.563774701300  | R=1.30 |
| 15 H | 5.213570154000 | 2.048183019000  | -1.210718284000 | R=1.30 |
| 16 H | 2.090134478000 | -1.081669394000 | 2.346104681000  | R=1.30 |
| 17 H | 1.980358010000 | -1.842525237000 | 0.736102129500  | R=1.30 |
| 18 H | 3.564500141000 | -1.650401376000 | 1.535666273000  | R=1.30 |
| 19 H | 0.793175968600 | 0.224402562300  | -0.258738120700 | R=1.30 |
| 20 H | 1.517321328000 | 1.839251153000  | -0.022935112620 | R=1.30 |
| 21 H | 0.814571658400 | 0.962210729700  | 1.361655238000  | R=1.30 |

END

#### GUIBONDS

1 1 2 1.0  
 2 1 3 1.0  
 3 2 4 1.0  
 4 2 5 1.0  
 5 2 8 1.0  
 6 3 6 1.0  
 7 3 7 1.0  
 8 3 9 1.0  
 9 4 19 1.0  
 10 4 20 1.0  
 11 4 21 1.0  
 12 5 16 1.0  
 13 5 17 1.0  
 14 5 18 1.0  
 15 6 13 1.0  
 16 6 14 1.0  
 17 6 15 1.0  
 18 7 10 1.0  
 19 7 11 1.0  
 20 7 12 1.0  
 END

#### SOLVATION

Surf Delley

Div ndiv=4  
Solvent name=CRS cav0=0.0 cav1=0.0  
Charged method=CONJ conv=1.00E-06 iter=300 corr  
C-Mat EXACT  
SCF VAR ALL  
CSMRSP  
END

BASIS  
type TZP  
core Small  
createoutput None  
END

XC  
GGA Becke Perdew  
END

RELATIVISTIC Scalar ZORA

GEOMETRY  
branch New  
iterations 100  
END

SCF  
iterations 50  
mixing 0.2  
diis  
END

BeckeGrid  
Quality Good  
End

ZlmFit  
Quality Normal  
End

ALLPOINTS  
NOPRINT LOGFILE

eor

```
# =====  
# COSKF  
# =====
```

```
rm -f COSKF  
"$ADFBIN/cpkf" TAPE21 COSKF COSMO  
mv TAPE21 GASPHASE.t21
```

```
# COSMO-RS Solvent calculation
```

```
# =====  
# The Molecule  
# =====
```

```
"$ADFBIN/adf" <<eor  
TITLE diisoprpylether
```

```
ATOMS
```

|      |                |                 |                 |        |
|------|----------------|-----------------|-----------------|--------|
| 1 O  | 3.422807717000 | 0.083829617500  | -0.563716205700 | R=1.72 |
| 2 C  | 2.732659265000 | 0.194620471000  | 0.710499924400  | R=2.00 |
| 3 C  | 4.871556336000 | 0.040509950590  | -0.457309842800 | R=2.00 |
| 4 C  | 1.384337351000 | 0.847227703400  | 0.429201274700  | R=2.00 |
| 5 C  | 2.586487974000 | -1.178235677000 | 1.369701997000  | R=2.00 |
| 6 C  | 5.448462710000 | 1.450769287000  | -0.317478565600 | R=2.00 |
| 7 C  | 5.385819791000 | -0.671322315100 | -1.702969643000 | R=2.00 |
| 8 H  | 3.318930092000 | 0.854996567100  | 1.372865071000  | R=1.30 |
| 9 H  | 5.141991406000 | -0.553645938200 | 0.432938178000  | R=1.30 |
| 10 H | 5.099682911000 | -0.114842691000 | -2.607920569000 | R=1.30 |
| 11 H | 4.973358386000 | -1.686944501000 | -1.771344368000 | R=1.30 |
| 12 H | 6.481996717000 | -0.740991540200 | -1.676644662000 | R=1.30 |
| 13 H | 6.541502910000 | 1.406967464000  | -0.206592878000 | R=1.30 |
| 14 H | 5.042569704000 | 1.965964814000  | 0.563774701300  | R=1.30 |
| 15 H | 5.213570154000 | 2.048183019000  | -1.210718284000 | R=1.30 |
| 16 H | 2.090134478000 | -1.081669394000 | 2.346104681000  | R=1.30 |
| 17 H | 1.980358010000 | -1.842525237000 | 0.736102129500  | R=1.30 |
| 18 H | 3.564500141000 | -1.650401376000 | 1.535666273000  | R=1.30 |
| 19 H | 0.793175968600 | 0.224402562300  | -0.258738120700 | R=1.30 |
| 20 H | 1.517321328000 | 1.839251153000  | -0.022935112620 | R=1.30 |
| 21 H | 0.814571658400 | 0.962210729700  | 1.361655238000  | R=1.30 |

```
END
```

```
GUIBONDS
```

```
1 1 2 1.0  
2 1 3 1.0
```

3 2 4 1.0  
4 2 5 1.0  
5 2 8 1.0  
6 3 6 1.0  
7 3 7 1.0  
8 3 9 1.0  
9 4 19 1.0  
10 4 20 1.0  
11 4 21 1.0  
12 5 16 1.0  
13 5 17 1.0  
14 5 18 1.0  
15 6 13 1.0  
16 6 14 1.0  
17 6 15 1.0  
18 7 10 1.0  
19 7 11 1.0  
20 7 12 1.0  
END

SOLVATION

Surf Delley  
Div ndiv=4  
Solvent name=CRS cav0=0.0 cav1=0.0  
Charged method=CONJ conv=1.00E-06 iter=300 corr  
C-Mat EXACT  
SCF VAR ALL  
CSMRSP

END

BASIS

type TZP  
core Small  
createoutput None  
END

XC

GGA Becke Perdew  
END

RELATIVISTIC Scalar ZORA  
RESTART GASPHASE.t21

SCF

iterations 50  
mixing 0.2

diis  
END

BeckeGrid  
Quality Good  
End

ZlmFit  
Quality Normal  
End

ALLPOINTS  
NOPRINT LOGFILE

eor

# =====  
# COSKF  
# =====

rm -f COSKF  
"\$ADFBIN/cpkf" TAPE21 COSKF COSMO

#!/bin/sh

# =====  
# The Molecule  
# =====

"\$ADFBIN/adf" <<eor  
TITLE butanol

ATOMS

|      |                 |                 |                 |        |
|------|-----------------|-----------------|-----------------|--------|
| 1 C  | -5.941474867000 | -1.478416935000 | 0.000805013136  | R=2.00 |
| 2 C  | -5.263299893000 | -0.108195508300 | -0.101123190700 | R=2.00 |
| 3 C  | -3.744896828000 | -0.177898459400 | 0.106327319000  | R=2.00 |
| 4 C  | -3.080997500000 | 1.186628150000  | 0.000198082432  | R=2.00 |
| 5 O  | -1.654154300000 | 1.029686025000  | 0.206016705400  | R=1.72 |
| 6 H  | -1.255332222000 | 1.917341993000  | 0.128166403900  | R=1.30 |
| 7 H  | -5.544121890000 | -2.173858099000 | -0.753652066500 | R=1.30 |
| 8 H  | -7.026717237000 | -1.399456259000 | -0.154317674200 | R=1.30 |
| 9 H  | -5.775536211000 | -1.929943894000 | 0.990436497300  | R=1.30 |
| 10 H | -5.701971758000 | 0.575572099700  | 0.644145342000  | R=1.30 |
| 11 H | -5.475880351000 | 0.334408147200  | -1.088205805000 | R=1.30 |

|      |                 |                 |                 |        |
|------|-----------------|-----------------|-----------------|--------|
| 12 H | -3.298355031000 | -0.853235459300 | -0.642347609200 | R=1.30 |
| 13 H | -3.524311048000 | -0.608297381900 | 1.097347409000  | R=1.30 |
| 14 H | -3.495872178000 | 1.872943580000  | 0.758481043300  | R=1.30 |
| 15 H | -3.269864035000 | 1.626246569000  | -0.994398000700 | R=1.30 |

END

#### GUIBONDS

1 2 1 1.0  
2 3 2 1.0  
3 4 3 1.0  
4 5 4 1.0  
5 6 5 1.0  
6 7 1 1.0  
7 8 1 1.0  
8 9 1 1.0  
9 10 2 1.0  
10 11 2 1.0  
11 12 3 1.0  
12 13 3 1.0  
13 14 4 1.0  
14 15 4 1.0

END

#### SOLVATION

Surf Delley  
Div ndiv=4  
Solvent name=CRS cav0=0.0 cav1=0.0  
Charged method=CONJ conv=1.00E-06 iter=300 corr  
C-Mat EXACT  
SCF VAR ALL  
CSMRSP

END

#### BASIS

type TZP  
core Small  
createoutput None

END

#### XC

GGA Becke Perdew

END

RELATIVISTIC Scalar ZORA

```
GEOMETRY
  branch New
  iterations 100
END
```

```
SCF
iterations 50
mixing 0.2
diis
END
```

```
BeckeGrid
  Quality Good
End
```

```
ZlmFit
  Quality Normal
End
```

```
ALLPOINTS
NOPRINT LOGFILE
```

```
eor
```

```
# =====
# COSKF
# =====
```

```
rm -f COSKF
"$ADFBIN/cpkf" TAPE21 COSKF COSMO
```

```
mv TAPE21 GASPHASE.t21
```

```
# COSMO-RS Solvent calculation
```

```
# =====
```



# The Molecule

# =====

"\$ADFBIN/adf" <<eor

TITLE butanol

ATOMS

|      |                 |                 |                 |        |
|------|-----------------|-----------------|-----------------|--------|
| 1 C  | -5.941474867000 | -1.478416935000 | 0.000805013136  | R=2.00 |
| 2 C  | -5.263299893000 | -0.108195508300 | -0.101123190700 | R=2.00 |
| 3 C  | -3.744896828000 | -0.177898459400 | 0.106327319000  | R=2.00 |
| 4 C  | -3.080997500000 | 1.186628150000  | 0.000198082432  | R=2.00 |
| 5 O  | -1.654154300000 | 1.029686025000  | 0.206016705400  | R=1.72 |
| 6 H  | -1.255332222000 | 1.917341993000  | 0.128166403900  | R=1.30 |
| 7 H  | -5.544121890000 | -2.173858099000 | -0.753652066500 | R=1.30 |
| 8 H  | -7.026717237000 | -1.399456259000 | -0.154317674200 | R=1.30 |
| 9 H  | -5.775536211000 | -1.929943894000 | 0.990436497300  | R=1.30 |
| 10 H | -5.701971758000 | 0.575572099700  | 0.644145342000  | R=1.30 |
| 11 H | -5.475880351000 | 0.334408147200  | -1.088205805000 | R=1.30 |
| 12 H | -3.298355031000 | -0.853235459300 | -0.642347609200 | R=1.30 |
| 13 H | -3.524311048000 | -0.608297381900 | 1.097347409000  | R=1.30 |
| 14 H | -3.495872178000 | 1.872943580000  | 0.758481043300  | R=1.30 |
| 15 H | -3.269864035000 | 1.626246569000  | -0.994398000700 | R=1.30 |

END

GUIBONDS

1 2 1 1.0  
2 3 2 1.0  
3 4 3 1.0  
4 5 4 1.0  
5 6 5 1.0  
6 7 1 1.0  
7 8 1 1.0  
8 9 1 1.0  
9 10 2 1.0  
10 11 2 1.0  
11 12 3 1.0  
12 13 3 1.0  
13 14 4 1.0  
14 15 4 1.0

END

SOLVATION

Surf Delley

Div ndiv=4

Solvent name=CRS cav0=0.0 cav1=0.0

Charged method=CONJ conv=1.00E-06 iter=300 corr

```
C-Mat EXACT
SCF VAR ALL
CSMRSP
END
```

```
BASIS
type TZP
core Small
createoutput None
END
```

```
XC
GGA Becke Perdew
END
```

```
RELATIVISTIC Scalar ZORA
```

```
RESTART GASPHASE.t21
```

```
SCF
iterations 50
mixing 0.2
diis
END
```

```
BeckeGrid
  Quality Good
End
```

```
ZlmFit
  Quality Normal
End
```

```
ALLPOINTS
NOPRINT LOGFILE
```

```
eor
```

```
# =====
# COSKF
# =====
```

```
rm -f COSKF
```

"\$ADFBIN/cpkf" TAPE21 COSKF COSMO

#!/bin/sh

# =====

# The Molecule

# =====

"\$ADFBIN/adf" -n \$NPROC <<eor

TITLE hexanol

ATOMS

|      |                 |                 |                 |        |
|------|-----------------|-----------------|-----------------|--------|
| 1 C  | -5.670791575000 | -1.719860405000 | -0.011842237510 | R=2.00 |
| 2 C  | -5.223069292000 | -0.256850641300 | -0.098243203220 | R=2.00 |
| 3 C  | -3.707354100000 | -0.080266045650 | 0.054211073150  | R=2.00 |
| 4 C  | -3.251322741000 | 1.380836295000  | -0.035830468820 | R=2.00 |
| 5 C  | -1.734076493000 | 1.551505889000  | 0.110947513000  | R=2.00 |
| 6 C  | -1.303585243000 | 3.007108677000  | 0.010692093440  | R=2.00 |
| 7 O  | 0.137652624700  | 3.078739740000  | 0.152616858100  | R=1.72 |
| 8 H  | 0.385130008200  | 4.020483405000  | 0.081289669990  | R=1.30 |
| 9 H  | -5.197199079000 | -2.325740657000 | -0.799160952300 | R=1.30 |
| 10 H | -6.760158493000 | -1.815375264000 | -0.125936138500 | R=1.30 |
| 11 H | -5.395380459000 | -2.161292156000 | 0.957994734700  | R=1.30 |
| 12 H | -5.736048449000 | 0.332570338000  | 0.680212878400  | R=1.30 |
| 13 H | -5.540950113000 | 0.169550520100  | -1.064498994000 | R=1.30 |
| 14 H | -3.193075063000 | -0.670964024900 | -0.723831966400 | R=1.30 |
| 15 H | -3.387458222000 | -0.503615385300 | 1.022267974000  | R=1.30 |
| 16 H | -3.763673919000 | 1.969955603000  | 0.744103704100  | R=1.30 |
| 17 H | -3.574763515000 | 1.802307685000  | -1.003093290000 | R=1.30 |
| 18 H | -1.216683643000 | 0.970945936800  | -0.670749578900 | R=1.30 |
| 19 H | -1.404979426000 | 1.146133014000  | 1.082081452000  | R=1.30 |
| 20 H | -1.788637792000 | 3.604159574000  | 0.802211896100  | R=1.30 |
| 21 H | -1.605387201000 | 3.427558232000  | -0.964138612900 | R=1.30 |

END

GUIBONDS

1 2 1 1.0

2 3 2 1.0

3 4 3 1.0

4 5 4 1.0

5 6 5 1.0

6 7 6 1.0

7 8 7 1.0

8 9 1 1.0

9 10 1 1.0  
10 11 1 1.0  
11 12 2 1.0  
12 13 2 1.0  
13 14 3 1.0  
14 15 3 1.0  
15 16 4 1.0  
16 17 4 1.0  
17 18 5 1.0  
18 19 5 1.0  
19 20 6 1.0  
20 21 6 1.0  
END

SOLVATION

Surf Delley  
Div ndiv=4  
Solvent name=CRS cav0=0.0 cav1=0.0  
Charged method=CONJ conv=1.00E-06 iter=300 corr  
C-Mat EXACT  
SCF VAR ALL  
CSMRSP

END

BASIS

type TZP  
core Small  
createoutput None  
END

XC

GGA Becke Perdew  
END

RELATIVISTIC Scalar ZORA

GEOMETRY

branch New  
iterations 100  
END

SCF

iterations 50  
mixing 0.2

diis  
END

BeckeGrid  
Quality Good  
End

ZlmFit  
Quality Normal  
End

ALLPOINTS  
NOPRINT LOGFILE

eor

# =====  
# COSKF  
# =====

rm -f COSKF  
"\$ADFBIN/cpkf" TAPE21 COSKF COSMO

mv TAPE21 GASPHASE.t21

# COSMO-RS Solvent calculation

# =====  
# The Molecule  
# =====

"\$ADFBIN/adf" -n \$NPROC <<eor  
TITLE hexanol

ATOMS

|     |                 |                 |                 |        |
|-----|-----------------|-----------------|-----------------|--------|
| 1 C | -5.670791575000 | -1.719860405000 | -0.011842237510 | R=2.00 |
| 2 C | -5.223069292000 | -0.256850641300 | -0.098243203220 | R=2.00 |

|      |                 |                 |                 |        |
|------|-----------------|-----------------|-----------------|--------|
| 3 C  | -3.707354100000 | -0.080266045650 | 0.054211073150  | R=2.00 |
| 4 C  | -3.251322741000 | 1.380836295000  | -0.035830468820 | R=2.00 |
| 5 C  | -1.734076493000 | 1.551505889000  | 0.110947513000  | R=2.00 |
| 6 C  | -1.303585243000 | 3.007108677000  | 0.010692093440  | R=2.00 |
| 7 O  | 0.137652624700  | 3.078739740000  | 0.152616858100  | R=1.72 |
| 8 H  | 0.385130008200  | 4.020483405000  | 0.081289669990  | R=1.30 |
| 9 H  | -5.197199079000 | -2.325740657000 | -0.799160952300 | R=1.30 |
| 10 H | -6.760158493000 | -1.815375264000 | -0.125936138500 | R=1.30 |
| 11 H | -5.395380459000 | -2.161292156000 | 0.957994734700  | R=1.30 |
| 12 H | -5.736048449000 | 0.332570338000  | 0.680212878400  | R=1.30 |
| 13 H | -5.540950113000 | 0.169550520100  | -1.064498994000 | R=1.30 |
| 14 H | -3.193075063000 | -0.670964024900 | -0.723831966400 | R=1.30 |
| 15 H | -3.387458222000 | -0.503615385300 | 1.022267974000  | R=1.30 |
| 16 H | -3.763673919000 | 1.969955603000  | 0.744103704100  | R=1.30 |
| 17 H | -3.574763515000 | 1.802307685000  | -1.003093290000 | R=1.30 |
| 18 H | -1.216683643000 | 0.970945936800  | -0.670749578900 | R=1.30 |
| 19 H | -1.404979426000 | 1.146133014000  | 1.082081452000  | R=1.30 |
| 20 H | -1.788637792000 | 3.604159574000  | 0.802211896100  | R=1.30 |
| 21 H | -1.605387201000 | 3.427558232000  | -0.964138612900 | R=1.30 |

END

#### GUIBONDS

1 2 1 1.0  
2 3 2 1.0  
3 4 3 1.0  
4 5 4 1.0  
5 6 5 1.0  
6 7 6 1.0  
7 8 7 1.0  
8 9 1 1.0  
9 10 1 1.0  
10 11 1 1.0  
11 12 2 1.0  
12 13 2 1.0  
13 14 3 1.0  
14 15 3 1.0  
15 16 4 1.0  
16 17 4 1.0  
17 18 5 1.0  
18 19 5 1.0  
19 20 6 1.0  
20 21 6 1.0

END

#### SOLVATION

Surf Delley

Div ndiv=4  
Solvent name=CRS cav0=0.0 cav1=0.0  
Charged method=CONJ conv=1.00E-06 iter=300 corr  
C-Mat EXACT  
SCF VAR ALL  
CSMRSP  
END

BASIS  
type TZP  
core Small  
createoutput None  
END

XC  
GGA Becke Perdew  
END

RELATIVISTIC Scalar ZORA

RESTART GASPHASE.t21

SCF  
iterations 50  
mixing 0.2  
diis  
END

BeckeGrid  
Quality Good  
End

ZlmFit  
Quality Normal  
End

ALLPOINTS  
NOPRINT LOGFILE

eor

# =====  
# COSKF

# =====

rm -f COSKF  
"\$ADFBIN/cpkf" TAPE21 COSKF COSMO

#!/bin/sh

# =====

# The Molecule

# =====

"\$ADFBIN/adf" <<eor

TITLE hexyne

ATOMS

|      |                 |                 |                 |        |
|------|-----------------|-----------------|-----------------|--------|
| 1 C  | -1.174607966000 | -0.155135832000 | 0.259467852500  | R=2.00 |
| 2 C  | -0.063497183450 | -1.205557288000 | 0.160638132700  | R=2.00 |
| 3 C  | 1.327199567000  | -0.583933772600 | -0.006316226876 | R=2.00 |
| 4 C  | 2.434710176000  | -1.654480370000 | -0.104216187600 | R=2.00 |
| 5 C  | 3.774308776000  | -1.094454437000 | -0.266365295000 | R=2.00 |
| 6 C  | 4.880509329000  | -0.614511272500 | -0.401064223500 | R=2.00 |
| 7 H  | -1.014883429000 | 0.510341468100  | 1.120917310000  | R=1.30 |
| 8 H  | -2.159872130000 | -0.627393653700 | 0.378607598700  | R=1.30 |
| 9 H  | -1.209211036000 | 0.470547108600  | -0.644844347900 | R=1.30 |
| 10 H | -0.264041406700 | -1.877447334000 | -0.690142033600 | R=1.30 |
| 11 H | -0.071003997230 | -1.838168591000 | 1.063507727000  | R=1.30 |
| 12 H | 1.543321889000  | 0.081218287180  | 0.844564846100  | R=1.30 |
| 13 H | 1.349863055000  | 0.041663297840  | -0.912492415900 | R=1.30 |
| 14 H | 2.224175426000  | -2.326431764000 | -0.952635356300 | R=1.30 |
| 15 H | 2.418913690000  | -2.285179863000 | 0.799930847800  | R=1.30 |
| 16 H | 5.859171417000  | -0.190781594900 | -0.520304466600 | R=1.30 |

END

GUIBONDS

1 1 2 1.0  
2 2 3 1.0  
3 3 4 1.0  
4 4 5 1.0  
5 5 6 3.0  
6 7 1 1.0  
7 8 1 1.0  
8 9 1 1.0  
9 10 2 1.0  
10 11 2 1.0  
11 12 3 1.0



12 13 3 1.0  
13 14 4 1.0  
14 15 4 1.0  
15 16 6 1.0  
END

SOLVATION

Surf Delley  
Div ndiv=4  
Solvent name=CRS cav0=0.0 cav1=0.0  
Charged method=CONJ conv=1.00E-06 iter=300 corr  
C-Mat EXACT  
SCF VAR ALL  
CSMRSP

END

BASIS

type TZP  
core Small  
createoutput None  
END

XC

GGA Becke Perdew  
END

RELATIVISTIC Scalar ZORA

GEOMETRY

branch New  
iterations 100

END

SCF

iterations 50  
mixing 0.2  
diis  
END

BeckeGrid

Quality Good  
End

```
ZlmFit
  Quality Normal
End
```

```
ALLPOINTS
NOPRINT LOGFILE
```

```
eor
```

```
# =====
# COSKF
# =====
```

```
rm -f COSKF
"$ADFBIN/cpkf" TAPE21 COSKF COSMO
```

```
mv TAPE21 GASPHASE.t21
```

```
# COSMO-RS Solvent calculation
```

```
# =====
# The Molecule
# =====
```

```
"$ADFBIN/adf" <<eor
TITLE hexyne
```

```
ATOMS
```

|      |                 |                 |                 |        |
|------|-----------------|-----------------|-----------------|--------|
| 1 C  | -1.174607966000 | -0.155135832000 | 0.259467852500  | R=2.00 |
| 2 C  | -0.063497183450 | -1.205557288000 | 0.160638132700  | R=2.00 |
| 3 C  | 1.327199567000  | -0.583933772600 | -0.006316226876 | R=2.00 |
| 4 C  | 2.434710176000  | -1.654480370000 | -0.104216187600 | R=2.00 |
| 5 C  | 3.774308776000  | -1.094454437000 | -0.266365295000 | R=2.00 |
| 6 C  | 4.880509329000  | -0.614511272500 | -0.401064223500 | R=2.00 |
| 7 H  | -1.014883429000 | 0.510341468100  | 1.120917310000  | R=1.30 |
| 8 H  | -2.159872130000 | -0.627393653700 | 0.378607598700  | R=1.30 |
| 9 H  | -1.209211036000 | 0.470547108600  | -0.644844347900 | R=1.30 |
| 10 H | -0.264041406700 | -1.877447334000 | -0.690142033600 | R=1.30 |

|      |                 |                 |                 |        |
|------|-----------------|-----------------|-----------------|--------|
| 11 H | -0.071003997230 | -1.838168591000 | 1.063507727000  | R=1.30 |
| 12 H | 1.543321889000  | 0.081218287180  | 0.844564846100  | R=1.30 |
| 13 H | 1.349863055000  | 0.041663297840  | -0.912492415900 | R=1.30 |
| 14 H | 2.224175426000  | -2.326431764000 | -0.952635356300 | R=1.30 |
| 15 H | 2.418913690000  | -2.285179863000 | 0.799930847800  | R=1.30 |
| 16 H | 5.859171417000  | -0.190781594900 | -0.520304466600 | R=1.30 |

END

#### GUIBONDS

1 1 2 1.0  
2 2 3 1.0  
3 3 4 1.0  
4 4 5 1.0  
5 5 6 3.0  
6 7 1 1.0  
7 8 1 1.0  
8 9 1 1.0  
9 10 2 1.0  
10 11 2 1.0  
11 12 3 1.0  
12 13 3 1.0  
13 14 4 1.0  
14 15 4 1.0  
15 16 6 1.0

END

#### SOLVATION

Surf Delley  
Div ndiv=4  
Solvent name=CRS cav0=0.0 cav1=0.0  
Charged method=CONJ conv=1.00E-06 iter=300 corr  
C-Mat EXACT  
SCF VAR ALL  
CSMRSP

END

#### BASIS

type TZP  
core Small  
createoutput None

END

#### XC

GGA Becke Perdew

END

RELATIVISTIC Scalar ZORA

RESTART GASPHASE.t21

SCF  
iterations 50  
mixing 0.2  
diis  
END

BeckeGrid  
Quality Good  
End

ZlmFit  
Quality Normal  
End

ALLPOINTS  
NOPRINT LOGFILE

eor

# =====  
# COSKF  
# =====

rm -f COSKF  
"\$ADFBIN/cpkf" TAPE21 COSKF COSMO

#!/bin/sh

# =====  
# The Molecule  
# =====

"\$ADFBIN/adf" <<eor  
TITLE heptyne

ATOMS

|      |                 |                 |                 |        |
|------|-----------------|-----------------|-----------------|--------|
| 1 C  | 0.379243629900  | -1.644062082000 | -0.184305161100 | R=2.00 |
| 2 C  | 1.753595595000  | -0.966284537500 | -0.146741638500 | R=2.00 |
| 3 C  | 2.910685339000  | -1.964751612000 | -0.018476038480 | R=2.00 |
| 4 C  | 4.287020308000  | -1.292096411000 | 0.018598061920  | R=2.00 |
| 5 C  | 5.432117005000  | -2.319388786000 | 0.147804122800  | R=2.00 |
| 6 C  | 6.759465752000  | -1.710144086000 | 0.184524988700  | R=2.00 |
| 7 C  | 7.854711961000  | -1.188714508000 | 0.212995146000  | R=2.00 |
| 8 H  | 0.301899401500  | -2.334420013000 | -1.037854942000 | R=1.30 |
| 9 H  | -0.429641285100 | -0.905213049700 | -0.276323870900 | R=1.30 |
| 10 H | 0.199762167600  | -2.225793388000 | 0.732437385800  | R=1.30 |
| 11 H | 1.792320364000  | -0.257381060400 | 0.696947493500  | R=1.30 |
| 12 H | 1.893466517000  | -0.365608217100 | -1.060891649000 | R=1.30 |
| 13 H | 2.874465823000  | -2.674473316000 | -0.862922562600 | R=1.30 |
| 14 H | 2.773742897000  | -2.565575266000 | 0.897217850500  | R=1.30 |
| 15 H | 4.337554426000  | -0.589494518100 | 0.865170956600  | R=1.30 |
| 16 H | 4.438073947000  | -0.698661391900 | -0.896853628300 | R=1.30 |
| 17 H | 5.388373010000  | -3.028546577000 | -0.695268948900 | R=1.30 |
| 18 H | 5.289202479000  | -2.918424691000 | 1.062414454000  | R=1.30 |
| 19 H | 8.823475569000  | -0.727802672400 | 0.238413868800  | R=1.30 |

END

#### GUIBONDS

1 1 2 1.0  
2 2 3 1.0  
3 3 4 1.0  
4 4 5 1.0  
5 5 6 1.0  
6 6 7 3.0  
7 8 1 1.0  
8 9 1 1.0  
9 10 1 1.0  
10 11 2 1.0  
11 12 2 1.0  
12 13 3 1.0  
13 14 3 1.0  
14 15 4 1.0  
15 16 4 1.0  
16 17 5 1.0  
17 18 5 1.0  
18 19 7 1.0

END

#### SOLVATION

Surf Delley

Div ndiv=4

Solvent name=CRS cav0=0.0 cav1=0.0

Charged method=CONJ conv=1.00E-06 iter=300 corr  
C-Mat EXACT  
SCF VAR ALL  
CSMRSP  
END

BASIS  
type TZP  
core Small  
createoutput None  
END

XC  
GGA Becke Perdew  
END

RELATIVISTIC Scalar ZORA

GEOMETRY  
branch New  
iterations 100  
END

SCF  
iterations 50  
mixing 0.2  
diis  
END

BeckeGrid  
Quality Good  
End

ZlmFit  
Quality Normal  
End

ALLPOINTS  
NOPRINT LOGFILE

eor

# =====

```
# COSKF
# =====
```

```
rm -f COSKF
"$ADFBIN/cpkf" TAPE21 COSKF COSMO
```

```
mv TAPE21 GASPHASE.t21
```

```
# COSMO-RS Solvent calculation
```

```
# =====
# The Molecule
# =====
```

```
"$ADFBIN/adf" <<eor
TITLE heptyne
```

```
ATOMS
```

|      |                 |                 |                 |        |
|------|-----------------|-----------------|-----------------|--------|
| 1 C  | 0.379243629900  | -1.644062082000 | -0.184305161100 | R=2.00 |
| 2 C  | 1.753595595000  | -0.966284537500 | -0.146741638500 | R=2.00 |
| 3 C  | 2.910685339000  | -1.964751612000 | -0.018476038480 | R=2.00 |
| 4 C  | 4.287020308000  | -1.292096411000 | 0.018598061920  | R=2.00 |
| 5 C  | 5.432117005000  | -2.319388786000 | 0.147804122800  | R=2.00 |
| 6 C  | 6.759465752000  | -1.710144086000 | 0.184524988700  | R=2.00 |
| 7 C  | 7.854711961000  | -1.188714508000 | 0.212995146000  | R=2.00 |
| 8 H  | 0.301899401500  | -2.334420013000 | -1.037854942000 | R=1.30 |
| 9 H  | -0.429641285100 | -0.905213049700 | -0.276323870900 | R=1.30 |
| 10 H | 0.199762167600  | -2.225793388000 | 0.732437385800  | R=1.30 |
| 11 H | 1.792320364000  | -0.257381060400 | 0.696947493500  | R=1.30 |
| 12 H | 1.893466517000  | -0.365608217100 | -1.060891649000 | R=1.30 |
| 13 H | 2.874465823000  | -2.674473316000 | -0.862922562600 | R=1.30 |
| 14 H | 2.773742897000  | -2.565575266000 | 0.897217850500  | R=1.30 |
| 15 H | 4.337554426000  | -0.589494518100 | 0.865170956600  | R=1.30 |
| 16 H | 4.438073947000  | -0.698661391900 | -0.896853628300 | R=1.30 |
| 17 H | 5.388373010000  | -3.028546577000 | -0.695268948900 | R=1.30 |
| 18 H | 5.289202479000  | -2.918424691000 | 1.062414454000  | R=1.30 |
| 19 H | 8.823475569000  | -0.727802672400 | 0.238413868800  | R=1.30 |

```
END
```

GUIBONDS

1 1 2 1.0  
2 2 3 1.0  
3 3 4 1.0  
4 4 5 1.0  
5 5 6 1.0  
6 6 7 3.0  
7 8 1 1.0  
8 9 1 1.0  
9 10 1 1.0  
10 11 2 1.0  
11 12 2 1.0  
12 13 3 1.0  
13 14 3 1.0  
14 15 4 1.0  
15 16 4 1.0  
16 17 5 1.0  
17 18 5 1.0  
18 19 7 1.0  
END

SOLVATION

Surf Delley  
Div ndiv=4  
Solvent name=CRS cav0=0.0 cav1=0.0  
Charged method=CONJ conv=1.00E-06 iter=300 corr  
C-Mat EXACT  
SCF VAR ALL  
CSMRSP  
END

BASIS

type TZP  
core Small  
createoutput None  
END

XC

GGA Becke Perdew  
END

RELATIVISTIC Scalar ZORA



RESTART GASPHASE.t21

SCF  
iterations 50  
mixing 0.2  
diis  
END

BeckeGrid  
Quality Good  
End

ZlmFit  
Quality Normal  
End

ALLPOINTS  
NOPRINT LOGFILE

eor

# =====  
# COSKF  
# =====

rm -f COSKF  
"\$ADFBIN/cpkf" TAPE21 COSKF COSMO

#!/bin/sh

# =====  
# The Molecule  
# =====

"\$ADFBIN/adf" <<eor  
TITLE 1-hexene

ATOMS

|     |                 |                |                 |        |
|-----|-----------------|----------------|-----------------|--------|
| 1 C | -1.374095589000 | 0.559723525900 | -0.448497628900 | R=2.00 |
| 2 C | -0.150187230800 | 1.427627727000 | -0.138684702100 | R=2.00 |
| 3 C | 1.139962172000  | 0.613535959200 | 0.016972549460  | R=2.00 |
| 4 C | 2.368458580000  | 1.484690311000 | 0.339810370900  | R=2.00 |
| 5 C | 3.622642677000  | 0.682753033700 | 0.542547645700  | R=2.00 |
| 6 C | 4.750062976000  | 0.813494625500 | -0.166811921500 | R=2.00 |

|      |                 |                 |                 |        |
|------|-----------------|-----------------|-----------------|--------|
| 7 H  | -1.235202117000 | -0.001340868748 | -1.385118568000 | R=1.30 |
| 8 H  | -2.282272703000 | 1.170127385000  | -0.555580781100 | R=1.30 |
| 9 H  | -1.554195220000 | -0.171614750900 | 0.353983558100  | R=1.30 |
| 10 H | -0.327899482700 | 2.000969370000  | 0.786549479200  | R=1.30 |
| 11 H | -0.013379574740 | 2.172545114000  | -0.940191916300 | R=1.30 |
| 12 H | 1.330904006000  | 0.045555539060  | -0.909183191400 | R=1.30 |
| 13 H | 1.005943487000  | -0.134343611300 | 0.817066009600  | R=1.30 |
| 14 H | 2.154094991000  | 2.052543358000  | 1.263463923000  | R=1.30 |
| 15 H | 2.526008538000  | 2.225483161000  | -0.460732232100 | R=1.30 |
| 16 H | 3.583774290000  | -0.072122125520 | 1.337822384000  | R=1.30 |
| 17 H | 4.833272721000  | 1.550926217000  | -0.970256167600 | R=1.30 |
| 18 H | 5.625446614000  | 0.192105681700  | 0.032005753750  | R=1.30 |

END

#### GUIBONDS

1 1 2 1.0  
2 2 3 1.0  
3 3 4 1.0  
4 4 5 1.0  
5 5 6 2.0  
6 7 1 1.0  
7 8 1 1.0  
8 9 1 1.0  
9 10 2 1.0  
10 11 2 1.0  
11 12 3 1.0  
12 13 3 1.0  
13 14 4 1.0  
14 15 4 1.0  
15 16 5 1.0  
16 17 6 1.0  
17 18 6 1.0

END

#### SOLVATION

Surf Delley  
Div ndiv=4  
Solvent name=CRS cav0=0.0 cav1=0.0  
Charged method=CONJ conv=1.00E-06 iter=300 corr  
C-Mat EXACT  
SCF VAR ALL  
CSMRSP

END

#### BASIS

type TZP

core Small  
createoutput None  
END

XC  
GGA Becke Perdew  
END

RELATIVISTIC Scalar ZORA

GEOMETRY  
  branch New  
  iterations 100  
END

SCF  
iterations 50  
mixing 0.2  
diis  
END

BeckeGrid  
  Quality Good  
End

ZlmFit  
  Quality Normal  
End

ALLPOINTS  
NOPRINT LOGFILE

eor

# =====  
# COSKF  
# =====

rm -f COSKF  
"\$ADFBIN/cpkf" TAPE21 COSKF COSMO

mv TAPE21 GASPHASE.t21

# COSMO-RS Solvent calculation

# =====

# The Molecule

# =====

"\$ADFBIN/adf" <<eor

TITLE 1-hexene

ATOMS

|      |                 |                 |                 |        |
|------|-----------------|-----------------|-----------------|--------|
| 1 C  | -1.374095589000 | 0.559723525900  | -0.448497628900 | R=2.00 |
| 2 C  | -0.150187230800 | 1.427627727000  | -0.138684702100 | R=2.00 |
| 3 C  | 1.139962172000  | 0.613535959200  | 0.016972549460  | R=2.00 |
| 4 C  | 2.368458580000  | 1.484690311000  | 0.339810370900  | R=2.00 |
| 5 C  | 3.622642677000  | 0.682753033700  | 0.542547645700  | R=2.00 |
| 6 C  | 4.750062976000  | 0.813494625500  | -0.166811921500 | R=2.00 |
| 7 H  | -1.235202117000 | -0.001340868748 | -1.385118568000 | R=1.30 |
| 8 H  | -2.282272703000 | 1.170127385000  | -0.555580781100 | R=1.30 |
| 9 H  | -1.554195220000 | -0.171614750900 | 0.353983558100  | R=1.30 |
| 10 H | -0.327899482700 | 2.000969370000  | 0.786549479200  | R=1.30 |
| 11 H | -0.013379574740 | 2.172545114000  | -0.940191916300 | R=1.30 |
| 12 H | 1.330904006000  | 0.045555539060  | -0.909183191400 | R=1.30 |
| 13 H | 1.005943487000  | -0.134343611300 | 0.817066009600  | R=1.30 |
| 14 H | 2.154094991000  | 2.052543358000  | 1.263463923000  | R=1.30 |
| 15 H | 2.526008538000  | 2.225483161000  | -0.460732232100 | R=1.30 |
| 16 H | 3.583774290000  | -0.072122125520 | 1.337822384000  | R=1.30 |
| 17 H | 4.833272721000  | 1.550926217000  | -0.970256167600 | R=1.30 |
| 18 H | 5.625446614000  | 0.192105681700  | 0.032005753750  | R=1.30 |

END

GUIBONDS

1 1 2 1.0

2 2 3 1.0

3 3 4 1.0

4 4 5 1.0

5 5 6 2.0

6 7 1 1.0

7 8 1 1.0

8 9 1 1.0  
9 10 2 1.0  
10 11 2 1.0  
11 12 3 1.0  
12 13 3 1.0  
13 14 4 1.0  
14 15 4 1.0  
15 16 5 1.0  
16 17 6 1.0  
17 18 6 1.0  
END

SOLVATION

Surf Delley  
Div ndiv=4  
Solvent name=CRS cav0=0.0 cav1=0.0  
Charged method=CONJ conv=1.00E-06 iter=300 corr  
C-Mat EXACT  
SCF VAR ALL  
CSMRSP

END

BASIS

type TZP  
core Small  
createoutput None  
END

XC

GGA Becke Perdew  
END

RELATIVISTIC Scalar ZORA

RESTART GASPHASE.t21

SCF

iterations 50  
mixing 0.2  
diis  
END

BeckeGrid

Quality Good

End

ZlmFit

Quality Normal

End

ALLPOINTS

NOPRINT LOGFILE

eor

# =====

# COSKF

# =====

rm -f COSKF

"\$ADFBIN/cpkf" TAPE21 COSKF COSMO

#!/bin/sh

# =====

# The Molecule

# =====

"\$ADFBIN/adf" <<eor

TITLE benzene

ATOMS

|      |                 |                 |                |        |
|------|-----------------|-----------------|----------------|--------|
| 1 C  | 0.000000000000  | 1.400070903000  | 0.000000000000 | R=2.00 |
| 2 C  | -1.212496969000 | 0.700035451500  | 0.000000000000 | R=2.00 |
| 3 C  | -1.212496969000 | -0.700035451500 | 0.000000000000 | R=2.00 |
| 4 C  | 0.000000000000  | -1.400070903000 | 0.000000000000 | R=2.00 |
| 5 C  | 1.212496969000  | -0.700035451500 | 0.000000000000 | R=2.00 |
| 6 C  | 1.212496969000  | 0.700035451500  | 0.000000000000 | R=2.00 |
| 7 H  | -2.157791421000 | 1.245801458000  | 0.000000000000 | R=1.30 |
| 8 H  | -2.157791421000 | -1.245801458000 | 0.000000000000 | R=1.30 |
| 9 H  | 0.000000000000  | -2.491602916000 | 0.000000000000 | R=1.30 |
| 10 H | 2.157791421000  | -1.245801458000 | 0.000000000000 | R=1.30 |
| 11 H | 2.157791421000  | 1.245801458000  | 0.000000000000 | R=1.30 |
| 12 H | 0.000000000000  | 2.491602916000  | 0.000000000000 | R=1.30 |

END

GUIBONDS

1 1 2 1.5  
2 2 3 1.5  
3 3 4 1.5  
4 4 5 1.5  
5 5 6 1.5  
6 6 1 1.5  
7 7 2 1.0  
8 8 3 1.0  
9 9 4 1.0  
10 10 5 1.0  
11 11 6 1.0  
12 12 1 1.0  
END

SOLVATION

Surf Delley  
Div ndiv=4  
Solvent name=CRS cav0=0.0 cav1=0.0  
Charged method=CONJ conv=1.00E-06 iter=300 corr  
C-Mat EXACT  
SCF VAR ALL  
CSMRSP

END

BASIS

type TZP  
core Small  
createoutput None  
END

XC

GGA Becke Perdew  
END

RELATIVISTIC Scalar ZORA

GEOMETRY

branch New  
iterations 100  
END

SCF

iterations 50  
mixing 0.2

diis  
END

BeckeGrid  
Quality Good  
End

ZlmFit  
Quality Normal  
End

ALLPOINTS  
NOPRINT LOGFILE

eor

# =====  
# COSKF  
# =====

rm -f COSKF  
"\$ADFBIN/cpkf" TAPE21 COSKF COSMO

mv TAPE21 GASPHASE.t21

# COSMO-RS Solvent calculation

# =====  
# The Molecule  
# =====

"\$ADFBIN/adf" <<eor  
TITLE benzene

ATOMS

|     |                 |                |                |        |
|-----|-----------------|----------------|----------------|--------|
| 1 C | 0.000000000000  | 1.400070903000 | 0.000000000000 | R=2.00 |
| 2 C | -1.212496969000 | 0.700035451500 | 0.000000000000 | R=2.00 |



|      |                 |                 |                |        |
|------|-----------------|-----------------|----------------|--------|
| 3 C  | -1.212496969000 | -0.700035451500 | 0.000000000000 | R=2.00 |
| 4 C  | 0.000000000000  | -1.400070903000 | 0.000000000000 | R=2.00 |
| 5 C  | 1.212496969000  | -0.700035451500 | 0.000000000000 | R=2.00 |
| 6 C  | 1.212496969000  | 0.700035451500  | 0.000000000000 | R=2.00 |
| 7 H  | -2.157791421000 | 1.245801458000  | 0.000000000000 | R=1.30 |
| 8 H  | -2.157791421000 | -1.245801458000 | 0.000000000000 | R=1.30 |
| 9 H  | 0.000000000000  | -2.491602916000 | 0.000000000000 | R=1.30 |
| 10 H | 2.157791421000  | -1.245801458000 | 0.000000000000 | R=1.30 |
| 11 H | 2.157791421000  | 1.245801458000  | 0.000000000000 | R=1.30 |
| 12 H | 0.000000000000  | 2.491602916000  | 0.000000000000 | R=1.30 |

END

#### GUIBONDS

1 1 2 1.5  
2 2 3 1.5  
3 3 4 1.5  
4 4 5 1.5  
5 5 6 1.5  
6 6 1 1.5  
7 7 2 1.0  
8 8 3 1.0  
9 9 4 1.0  
10 10 5 1.0  
11 11 6 1.0  
12 12 1 1.0

END

#### SOLVATION

Surf Delley  
Div ndiv=4  
Solvent name=CRS cav0=0.0 cav1=0.0  
Charged method=CONJ conv=1.00E-06 iter=300 corr  
C-Mat EXACT  
SCF VAR ALL  
CSMRSP

END

#### BASIS

type TZP  
core Small  
createoutput None

END

#### XC

GGA Becke Perdew

END

RELATIVISTIC Scalar ZORA

RESTART GASPHASE.t21

SCF  
iterations 50  
mixing 0.2  
diis  
END

BeckeGrid  
Quality Good  
End

ZlmFit  
Quality Normal  
End

ALLPOINTS  
NOPRINT LOGFILE

eor

# =====  
# COSKF  
# =====

rm -f COSKF  
"\$ADFBIN/cpkf" TAPE21 COSKF COSMO

#!/bin/sh

# =====  
# The Molecule  
# =====

"\$ADFBIN/adf" <<eor  
TITLE 13do

ATOMS  
1 O 1.160635966000 -0.383470227700 0.053626243520 R=1.72

|      |                 |                 |                 |        |
|------|-----------------|-----------------|-----------------|--------|
| 2 O  | -1.160822831000 | -0.383040108400 | -0.053162533770 | R=1.72 |
| 3 C  | 0.707211567400  | 0.953599319200  | -0.277027689600 | R=2.00 |
| 4 C  | -0.706748287100 | 0.954063847500  | 0.276511741400  | R=2.00 |
| 5 C  | -0.000176788131 | -1.228281444000 | -0.000357813516 | R=2.00 |
| 6 H  | 0.714744043500  | 1.107750041000  | -1.368475718000 | R=1.30 |
| 7 H  | 1.380066578000  | 1.666352770000  | 0.213030098800  | R=1.30 |
| 8 H  | -0.714191957900 | 1.108982936000  | 1.367846711000  | R=1.30 |
| 9 H  | -1.379287453000 | 1.666797804000  | -0.214021742900 | R=1.30 |
| 10 H | -0.001513548581 | -1.850882471000 | -0.910106775300 | R=1.30 |
| 11 H | 0.000975040414  | -1.852104075000 | 0.908525682400  | R=1.30 |

END

#### GUIBONDS

1 1 3 1.0  
2 1 5 1.0  
3 2 4 1.0  
4 2 5 1.0  
5 3 4 1.0  
6 3 6 1.0  
7 3 7 1.0  
8 4 8 1.0  
9 4 9 1.0  
10 5 10 1.0  
11 5 11 1.0

END

#### SOLVATION

Surf Delley  
Div ndiv=4  
Solvent name=CRS cav0=0.0 cav1=0.0  
Charged method=CONJ conv=1.00E-06 iter=300 corr  
C-Mat EXACT  
SCF VAR ALL  
CSMRSP

END

#### BASIS

type TZP  
core Small  
createoutput None

END

#### XC

GGA Becke Perdew

END

RELATIVISTIC Scalar ZORA

GEOMETRY  
  branch New  
  iterations 100  
END

SCF  
iterations 50  
mixing 0.2  
diis  
END

BeckeGrid  
  Quality Good  
End

ZlmFit  
  Quality Normal  
End

ALLPOINTS  
NOPRINT LOGFILE

eor

# =====  
# COSKF  
# =====

rm -f COSKF  
"\$ADFBIN/cpkf" TAPE21 COSKF COSMO

mv TAPE21 GASPHASE.t21

# COSMO-RS Solvent calculation

# =====

# The Molecule

# =====

"\$ADFBIN/adf" <<eor

TITLE 13do

ATOMS

|      |                 |                 |                 |        |
|------|-----------------|-----------------|-----------------|--------|
| 1 O  | 1.160635966000  | -0.383470227700 | 0.053626243520  | R=1.72 |
| 2 O  | -1.160822831000 | -0.383040108400 | -0.053162533770 | R=1.72 |
| 3 C  | 0.707211567400  | 0.953599319200  | -0.277027689600 | R=2.00 |
| 4 C  | -0.706748287100 | 0.954063847500  | 0.276511741400  | R=2.00 |
| 5 C  | -0.000176788131 | -1.228281444000 | -0.000357813516 | R=2.00 |
| 6 H  | 0.714744043500  | 1.107750041000  | -1.368475718000 | R=1.30 |
| 7 H  | 1.380066578000  | 1.666352770000  | 0.213030098800  | R=1.30 |
| 8 H  | -0.714191957900 | 1.108982936000  | 1.367846711000  | R=1.30 |
| 9 H  | -1.379287453000 | 1.666797804000  | -0.214021742900 | R=1.30 |
| 10 H | -0.001513548581 | -1.850882471000 | -0.910106775300 | R=1.30 |
| 11 H | 0.000975040414  | -1.852104075000 | 0.908525682400  | R=1.30 |

END

GUIBONDS

1 1 3 1.0  
2 1 5 1.0  
3 2 4 1.0  
4 2 5 1.0  
5 3 4 1.0  
6 3 6 1.0  
7 3 7 1.0  
8 4 8 1.0  
9 4 9 1.0  
10 5 10 1.0  
11 5 11 1.0

END

SOLVATION

Surf Delley

Div ndiv=4

Solvent name=CRS cav0=0.0 cav1=0.0

Charged method=CONJ conv=1.00E-06 iter=300 corr

C-Mat EXACT

SCF VAR ALL

CSMRSP

END

BASIS  
type TZP  
core Small  
createoutput None  
END

XC  
GGA Becke Perdew  
END

RELATIVISTIC Scalar ZORA

RESTART GASPHASE.t21

SCF  
iterations 50  
mixing 0.2  
diis  
END

BeckeGrid  
Quality Good  
End

ZlmFit  
Quality Normal  
End

ALLPOINTS  
NOPRINT LOGFILE

eor

# =====  
# COSKF  
# =====

rm -f COSKF  
"\$ADFBIN/cpkf" TAPE21 COSKF COSMO

```
#!/bin/sh
```

```
# =====
```

```
# The Molecule
```

```
# =====
```

```
"$ADFBIN/adf" <<eor
```

```
TITLE acn
```

```
ATOMS
```

|     |                 |                 |                 |        |
|-----|-----------------|-----------------|-----------------|--------|
| 1 C | 0.000000000000  | 0.000000000000  | -3.847553338000 | R=2.00 |
| 2 C | 0.000000000000  | 0.000000000000  | -2.394526590000 | R=2.00 |
| 3 N | 0.000000000000  | 0.000000000000  | -1.230767850000 | R=1.83 |
| 4 H | -0.516688183000 | 0.894930184600  | -4.217198118000 | R=1.30 |
| 5 H | -0.516688183000 | -0.894930184600 | -4.217198118000 | R=1.30 |
| 6 H | 1.033376366000  | 0.000000000000  | -4.217198118000 | R=1.30 |

```
END
```

```
GUIBONDS
```

```
1 2 1 1.0
```

```
2 3 2 3.0
```

```
3 4 1 1.0
```

```
4 5 1 1.0
```

```
5 6 1 1.0
```

```
END
```

```
SOLVATION
```

```
Surf Delley
```

```
Div ndiv=4
```

```
Solvent name=CRS cav0=0.0 cav1=0.0
```

```
Charged method=CONJ conv=1.00E-06 iter=300 corr
```

```
C-Mat EXACT
```

```
SCF VAR ALL
```

```
CSMRSP
```

```
END
```

```
BASIS
```

```
type TZP
```

```
core Small
```

```
createoutput None
```

```
END
```

```
XC
```

```
GGA Becke Perdew
```

```
END
```

RELATIVISTIC Scalar ZORA

GEOMETRY  
  branch New  
  iterations 100  
END

SCF  
iterations 50  
mixing 0.2  
diis  
END

BeckeGrid  
  Quality Good  
End

ZlmFit  
  Quality Normal  
End

ALLPOINTS  
NOPRINT LOGFILE

eor

# =====  
# COSKF  
# =====

rm -f COSKF  
"\$ADFBIN/cpkf" TAPE21 COSKF COSMO

mv TAPE21 GASPHASE.t21



# COSMO-RS Solvent calculation

# =====

# The Molecule

# =====

"\$ADFBIN/adf" <<eor

TITLE acn

ATOMS

|     |                 |                 |                 |        |
|-----|-----------------|-----------------|-----------------|--------|
| 1 C | 0.000000000000  | 0.000000000000  | -3.847553338000 | R=2.00 |
| 2 C | 0.000000000000  | 0.000000000000  | -2.394526590000 | R=2.00 |
| 3 N | 0.000000000000  | 0.000000000000  | -1.230767850000 | R=1.83 |
| 4 H | -0.516688183000 | 0.894930184600  | -4.217198118000 | R=1.30 |
| 5 H | -0.516688183000 | -0.894930184600 | -4.217198118000 | R=1.30 |
| 6 H | 1.033376366000  | 0.000000000000  | -4.217198118000 | R=1.30 |

END

GUIBONDS

1 2 1 1.0

2 3 2 3.0

3 4 1 1.0

4 5 1 1.0

5 6 1 1.0

END

SOLVATION

Surf Delley

Div ndiv=4

Solvent name=CRS cav0=0.0 cav1=0.0

Charged method=CONJ conv=1.00E-06 iter=300 corr

C-Mat EXACT

SCF VAR ALL

CSMRSP

END

BASIS

type TZP

core Small

createoutput None

END

XC

GGA Becke Perdew

END

RELATIVISTIC Scalar ZORA

RESTART GASPHASE.t21

SCF  
iterations 50  
mixing 0.2  
diis  
END

BeckeGrid  
Quality Good  
End

ZlmFit  
Quality Normal  
End

ALLPOINTS  
NOPRINT LOGFILE

eor

# =====  
# COSKF  
# =====

rm -f COSKF  
"\$ADFBIN/cpkf" TAPE21 COSKF COSMO

#!/bin/sh

# =====  
# The Molecule  
# =====

"\$ADFBIN/adf" <<eor  
TITLE dmpu

ATOMS  
1 O 2.628583077000 -3.428601648000 0.000079817254 R=1.72  
2 C 2.007857721000 -2.338003994000 -0.058365939340 R=2.00

|      |                 |                 |                 |        |
|------|-----------------|-----------------|-----------------|--------|
| 3 N  | 2.682471777000  | -1.133699009000 | -0.131087033100 | R=1.83 |
| 4 C  | 4.123912702000  | -1.124367512000 | 0.097372243710  | R=2.00 |
| 5 C  | 2.010722328000  | 0.163018139400  | 0.019391554150  | R=2.00 |
| 6 C  | 0.609427776200  | 0.108332118800  | -0.567932849600 | R=2.00 |
| 7 C  | -0.143241262600 | -1.065866123000 | 0.036679963800  | R=2.00 |
| 8 N  | 0.627679628500  | -2.304848214000 | -0.123391306200 | R=1.83 |
| 9 C  | -0.108978467300 | -3.543035078000 | 0.109266479700  | R=2.00 |
| 10 H | 4.586379638000  | -0.364729440000 | -0.547661701700 | R=1.30 |
| 11 H | 4.534857192000  | -2.107947544000 | -0.143798711000 | R=1.30 |
| 12 H | 4.364251976000  | -0.883031431200 | 1.147574769000  | R=1.30 |
| 13 H | 2.620797231000  | 0.916215427100  | -0.499307716900 | R=1.30 |
| 14 H | 1.973314355000  | 0.448720965900  | 1.087251297000  | R=1.30 |
| 15 H | 0.666577949200  | -0.007722733623 | -1.660761741000 | R=1.30 |
| 16 H | 0.077267084840  | 1.044669548000  | -0.354541448000 | R=1.30 |
| 17 H | -1.110717774000 | -1.208527160000 | -0.465143004900 | R=1.30 |
| 18 H | -0.351896182300 | -0.882614952600 | 1.107234622000  | R=1.30 |
| 19 H | 0.514374233400  | -4.395068097000 | -0.173486463500 | R=1.30 |
| 20 H | -1.021198361000 | -3.536626106000 | -0.502226775400 | R=1.30 |
| 21 H | -0.399715508200 | -3.649816881000 | 1.168990208000  | R=1.30 |

END

#### GUIBONDS

1 1 2 2.0  
 2 2 3 1.0  
 3 2 8 1.0  
 4 3 4 1.0  
 5 3 5 1.0  
 6 5 6 1.0  
 7 6 7 1.0  
 8 7 8 1.0  
 9 8 9 1.0  
 10 10 4 1.0  
 11 11 4 1.0  
 12 12 4 1.0  
 13 13 5 1.0  
 14 14 5 1.0  
 15 15 6 1.0  
 16 16 6 1.0  
 17 17 7 1.0  
 18 18 7 1.0  
 19 19 9 1.0  
 20 20 9 1.0  
 21 21 9 1.0

END

#### SOLVATION

Surf Delley  
Div ndiv=4  
Solvent name=CRS cav0=0.0 cav1=0.0  
Charged method=CONJ conv=1.00E-06 iter=300 corr  
C-Mat EXACT  
SCF VAR ALL  
CSMRSP  
END

BASIS  
type TZP  
core Small  
createoutput None  
END

XC  
GGA Becke Perdew  
END

RELATIVISTIC Scalar ZORA

GEOMETRY  
branch New  
iterations 100  
END

SCF  
iterations 50  
mixing 0.2  
diis  
END

BeckeGrid  
Quality Good  
End

ZlmFit  
Quality Normal  
End

ALLPOINTS  
NOPRINT LOGFILE

eor

# =====  
# COSKF  
# =====

rm -f COSKF  
"\$ADFBIN/cpkf" TAPE21 COSKF COSMO

mv TAPE21 GASPHASE.t21

# COSMO-RS Solvent calculation

# =====  
# The Molecule  
# =====

"\$ADFBIN/adf" <<eor  
TITLE dmpu

ATOMS

|      |                 |                 |                 |        |
|------|-----------------|-----------------|-----------------|--------|
| 1 O  | 2.628583077000  | -3.428601648000 | 0.000079817254  | R=1.72 |
| 2 C  | 2.007857721000  | -2.338003994000 | -0.058365939340 | R=2.00 |
| 3 N  | 2.682471777000  | -1.133699009000 | -0.131087033100 | R=1.83 |
| 4 C  | 4.123912702000  | -1.124367512000 | 0.097372243710  | R=2.00 |
| 5 C  | 2.010722328000  | 0.163018139400  | 0.019391554150  | R=2.00 |
| 6 C  | 0.609427776200  | 0.108332118800  | -0.567932849600 | R=2.00 |
| 7 C  | -0.143241262600 | -1.065866123000 | 0.036679963800  | R=2.00 |
| 8 N  | 0.627679628500  | -2.304848214000 | -0.123391306200 | R=1.83 |
| 9 C  | -0.108978467300 | -3.543035078000 | 0.109266479700  | R=2.00 |
| 10 H | 4.586379638000  | -0.364729440000 | -0.547661701700 | R=1.30 |
| 11 H | 4.534857192000  | -2.107947544000 | -0.143798711000 | R=1.30 |
| 12 H | 4.364251976000  | -0.883031431200 | 1.147574769000  | R=1.30 |
| 13 H | 2.620797231000  | 0.916215427100  | -0.499307716900 | R=1.30 |
| 14 H | 1.973314355000  | 0.448720965900  | 1.087251297000  | R=1.30 |
| 15 H | 0.666577949200  | -0.007722733623 | -1.660761741000 | R=1.30 |
| 16 H | 0.077267084840  | 1.044669548000  | -0.354541448000 | R=1.30 |
| 17 H | -1.110717774000 | -1.208527160000 | -0.465143004900 | R=1.30 |

|      |                 |                 |                 |        |
|------|-----------------|-----------------|-----------------|--------|
| 18 H | -0.351896182300 | -0.882614952600 | 1.107234622000  | R=1.30 |
| 19 H | 0.514374233400  | -4.395068097000 | -0.173486463500 | R=1.30 |
| 20 H | -1.021198361000 | -3.536626106000 | -0.502226775400 | R=1.30 |
| 21 H | -0.399715508200 | -3.649816881000 | 1.168990208000  | R=1.30 |

END

#### GUIBONDS

1 1 2 2.0  
2 2 3 1.0  
3 2 8 1.0  
4 3 4 1.0  
5 3 5 1.0  
6 5 6 1.0  
7 6 7 1.0  
8 7 8 1.0  
9 8 9 1.0  
10 10 4 1.0  
11 11 4 1.0  
12 12 4 1.0  
13 13 5 1.0  
14 14 5 1.0  
15 15 6 1.0  
16 16 6 1.0  
17 17 7 1.0  
18 18 7 1.0  
19 19 9 1.0  
20 20 9 1.0  
21 21 9 1.0

END

#### SOLVATION

Surf Delley  
Div ndiv=4  
Solvent name=CRS cav0=0.0 cav1=0.0  
Charged method=CONJ conv=1.00E-06 iter=300 corr  
C-Mat EXACT  
SCF VAR ALL  
CSMRSP

END

#### BASIS

type TZP  
core Small  
createoutput None  
END

XC  
GGA Becke Perdew  
END

RELATIVISTIC Scalar ZORA

RESTART GASPHASE.t21

SCF  
iterations 50  
mixing 0.2  
diis  
END

BeckeGrid  
Quality Good  
End

ZlmFit  
Quality Normal  
End

ALLPOINTS  
NOPRINT LOGFILE

eor

# =====  
# COSKF  
# =====

rm -f COSKF  
"\$ADFBIN/cpkf" TAPE21 COSKF COSMO

"\$ADFBIN/adf" -n \$NPROC <<eor  
TITLE gbl

ATOMS

|     |                 |                 |                 |        |
|-----|-----------------|-----------------|-----------------|--------|
| 1 O | 0.069437547570  | -1.120676765000 | -0.036426434080 | R=1.72 |
| 2 O | 2.033473021000  | -0.016858780270 | -0.058001220190 | R=1.72 |
| 3 C | -1.475791201000 | 0.691720814200  | -0.223558869000 | R=2.00 |
| 4 C | -0.093991764900 | 1.227337475000  | 0.166285076600  | R=2.00 |

|      |                 |                 |                 |        |
|------|-----------------|-----------------|-----------------|--------|
| 5 C  | -1.360372236000 | -0.793318481000 | 0.133206910300  | R=2.00 |
| 6 C  | 0.814221753600  | 0.023432796310  | 0.012211139530  | R=2.00 |
| 7 H  | -2.299433233000 | 1.175027545000  | 0.313260664900  | R=1.30 |
| 8 H  | -1.642078819000 | 0.811055794000  | -1.302144491000 | R=1.30 |
| 9 H  | -0.051380714760 | 1.533248925000  | 1.224079480000  | R=1.30 |
| 10 H | 0.272221501100  | 2.063202860000  | -0.439486689100 | R=1.30 |
| 11 H | -1.614830549000 | -0.998705501300 | 1.181555849000  | R=1.30 |
| 12 H | -1.919066483000 | -1.464944216000 | -0.525642300300 | R=1.30 |

END

#### GUIBONDS

1 1 5 1.0  
2 1 6 1.0  
3 2 6 2.0  
4 3 4 1.0  
5 3 5 1.0  
6 3 7 1.0  
7 3 8 1.0  
8 4 6 1.0  
9 4 9 1.0  
10 4 10 1.0  
11 5 11 1.0  
12 5 12 1.0

END

#### SOLVATION

Surf Delley  
Div ndiv=4  
Solvent name=CRS cav0=0.0 cav1=0.0  
Charged method=CONJ conv=1.00E-06 iter=300 corr  
C-Mat EXACT  
SCF VAR ALL  
CSMRSP

END

#### BASIS

type TZP  
core Small  
createoutput None

END

#### XC

GGA Becke Perdew

END

RELATIVISTIC Scalar ZORA



```
GEOMETRY
  branch New
  iterations 100
END
```

```
SCF
iterations 50
mixing 0.2
diis
END
```

```
BeckeGrid
  Quality Good
End
```

```
ZlmFit
  Quality Normal
End
```

```
ALLPOINTS
NOPRINT LOGFILE
```

```
eor
```

```
# =====
# COSKF
# =====
```

```
rm -f COSKF
"$ADFBIN/cpkf" TAPE21 COSKF COSMO
```

```
mv TAPE21 GASPHASE.t21
```

```
# COSMO-RS Solvent calculation
```

```
# =====  
# The Molecule  
# =====
```

```
"$ADFBIN/adf" -n $NPROC <<eor  
TITLE gbl
```

ATOMS

|      |                 |                 |                 |        |
|------|-----------------|-----------------|-----------------|--------|
| 1 O  | 0.069437547570  | -1.120676765000 | -0.036426434080 | R=1.72 |
| 2 O  | 2.033473021000  | -0.016858780270 | -0.058001220190 | R=1.72 |
| 3 C  | -1.475791201000 | 0.691720814200  | -0.223558869000 | R=2.00 |
| 4 C  | -0.093991764900 | 1.227337475000  | 0.166285076600  | R=2.00 |
| 5 C  | -1.360372236000 | -0.793318481000 | 0.133206910300  | R=2.00 |
| 6 C  | 0.814221753600  | 0.023432796310  | 0.012211139530  | R=2.00 |
| 7 H  | -2.299433233000 | 1.175027545000  | 0.313260664900  | R=1.30 |
| 8 H  | -1.642078819000 | 0.811055794000  | -1.302144491000 | R=1.30 |
| 9 H  | -0.051380714760 | 1.533248925000  | 1.224079480000  | R=1.30 |
| 10 H | 0.272221501100  | 2.063202860000  | -0.439486689100 | R=1.30 |
| 11 H | -1.614830549000 | -0.998705501300 | 1.181555849000  | R=1.30 |
| 12 H | -1.919066483000 | -1.464944216000 | -0.525642300300 | R=1.30 |

END

GUIBONDS

1 1 5 1.0  
2 1 6 1.0  
3 2 6 2.0  
4 3 4 1.0  
5 3 5 1.0  
6 3 7 1.0  
7 3 8 1.0  
8 4 6 1.0  
9 4 9 1.0  
10 4 10 1.0  
11 5 11 1.0  
12 5 12 1.0  
END

SOLVATION

Surf Delley  
Div ndiv=4  
Solvent name=CRS cav0=0.0 cav1=0.0  
Charged method=CONJ conv=1.00E-06 iter=300 corr  
C-Mat EXACT  
SCF VAR ALL  
CSMRSP

END

BASIS

type TZP

core Small

createoutput None

END

XC

GGA Becke Perdew

END

RELATIVISTIC Scalar ZORA

RESTART GASPHASE.t21

SCF

iterations 50

mixing 0.2

diis

END

BeckeGrid

Quality Good

End

ZlmFit

Quality Normal

End

ALLPOINTS

NOPRINT LOGFILE

eor

# =====

# COSKF

# =====

rm -f COSKF

"\$ADFBIN/cpkf" TAPE21 COSKF COSMO

"\$ADFBIN/adf" -n \$NPROC <<eor

TITLE ma

ATOMS

|      |                 |                 |                 |        |
|------|-----------------|-----------------|-----------------|--------|
| 1 O  | -0.668358451200 | 0.765086021300  | -0.000163659803 | R=1.72 |
| 2 O  | 0.341141324400  | -1.271276769000 | 0.000295167158  | R=1.72 |
| 3 C  | 1.698786233000  | 0.746445852200  | -0.000233051324 | R=2.00 |
| 4 C  | 0.420649512000  | -0.048055086290 | -0.000000131540 | R=2.00 |
| 5 C  | -1.956895521000 | 0.082847884640  | -0.000172799336 | R=2.00 |
| 6 H  | 1.733461609000  | 1.395459895000  | 0.885107918300  | R=1.30 |
| 7 H  | 1.733822845000  | 1.394204797000  | -0.886484075100 | R=1.30 |
| 8 H  | 2.556260324000  | 0.067778858110  | 0.000396502370  | R=1.30 |
| 9 H  | -2.054342247000 | -0.539638352400 | -0.897202345700 | R=1.30 |
| 10 H | -2.703508622000 | 0.881170151000  | -0.000440698930 | R=1.30 |
| 11 H | -2.054562486000 | -0.539233585900 | 0.897113209000  | R=1.30 |

END

GUIBONDS

1 1 4 1.0  
2 1 5 1.0  
3 2 4 2.0  
4 3 4 1.0  
5 3 6 1.0  
6 3 7 1.0  
7 3 8 1.0  
8 5 9 1.0  
9 5 10 1.0  
10 5 11 1.0

END

SOLVATION

Surf Delley

Div ndiv=4

Solvent name=CRS cav0=0.0 cav1=0.0

Charged method=CONJ conv=1.00E-06 iter=300 corr

C-Mat EXACT

SCF VAR ALL

CSMRSP

END

BASIS

type TZP

core Small

createoutput None

END

```
XC
GGA Becke Perdew
END
```

```
RELATIVISTIC Scalar ZORA
```

```
GEOMETRY
  branch New
  iterations 100
END
```

```
SCF
iterations 50
mixing 0.2
diis
END
```

```
BeckeGrid
  Quality Good
End
```

```
ZlmFit
  Quality Normal
End
```

```
ALLPOINTS
NOPRINT LOGFILE
```

```
eor
```

```
# =====
# COSKF
# =====
```

```
rm -f COSKF
"$ADFBIN/cpkf" TAPE21 COSKF COSMO
```

mv TAPE21 GASPHASE.t21

# COSMO-RS Solvent calculation

# =====

# The Molecule

# =====

"\$ADFBIN/adf" -n \$NPROC <<eor

TITLE ma

ATOMS

|      |                 |                 |                 |        |
|------|-----------------|-----------------|-----------------|--------|
| 1 O  | -0.668358451200 | 0.765086021300  | -0.000163659803 | R=1.72 |
| 2 O  | 0.341141324400  | -1.271276769000 | 0.000295167158  | R=1.72 |
| 3 C  | 1.698786233000  | 0.746445852200  | -0.000233051324 | R=2.00 |
| 4 C  | 0.420649512000  | -0.048055086290 | -0.000000131540 | R=2.00 |
| 5 C  | -1.956895521000 | 0.082847884640  | -0.000172799336 | R=2.00 |
| 6 H  | 1.733461609000  | 1.395459895000  | 0.885107918300  | R=1.30 |
| 7 H  | 1.733822845000  | 1.394204797000  | -0.886484075100 | R=1.30 |
| 8 H  | 2.556260324000  | 0.067778858110  | 0.000396502370  | R=1.30 |
| 9 H  | -2.054342247000 | -0.539638352400 | -0.897202345700 | R=1.30 |
| 10 H | -2.703508622000 | 0.881170151000  | -0.000440698930 | R=1.30 |
| 11 H | -2.054562486000 | -0.539233585900 | 0.897113209000  | R=1.30 |

END

GUIBONDS

1 1 4 1.0  
2 1 5 1.0  
3 2 4 2.0  
4 3 4 1.0  
5 3 6 1.0  
6 3 7 1.0  
7 3 8 1.0  
8 5 9 1.0  
9 5 10 1.0  
10 5 11 1.0

END

SOLVATION

Surf Delley

Div ndiv=4

Solvent name=CRS cav0=0.0 cav1=0.0

Charged method=CONJ conv=1.00E-06 iter=300 corr

C-Mat EXACT

```
SCF VAR ALL
CSMRSP
END
```

```
BASIS
type TZP
core Small
createoutput None
END
```

```
XC
GGA Becke Perdew
END
```

```
RELATIVISTIC Scalar ZORA
```

```
RESTART GASPHASE.t21
```

```
SCF
iterations 50
mixing 0.2
diis
END
```

```
BeckeGrid
  Quality Good
End
```

```
ZlmFit
  Quality Normal
End
```

```
ALLPOINTS
NOPRINT LOGFILE
```

```
eor
```

```
# =====
# COSKF
# =====
```

```
rm -f COSKF
"$ADFBIN/cpkf" TAPE21 COSKF COSMO
```

#!/bin/sh

# =====

# The Molecule

# =====

"\$ADFBIN/adf" <<eor

TITLE pc

ATOMS

|      |                 |                |                 |        |
|------|-----------------|----------------|-----------------|--------|
| 1 O  | -1.380495289000 | 1.843682694000 | 0.048231311400  | R=1.72 |
| 2 C  | -2.848514110000 | 2.014037692000 | 0.166768492800  | R=2.00 |
| 3 C  | -2.952092331000 | 3.419929231000 | 0.761616886300  | R=2.00 |
| 4 O  | -1.650485034000 | 3.621624948000 | 1.399142265000  | R=1.72 |
| 5 C  | -0.768516116500 | 2.737676572000 | 0.861450333400  | R=2.00 |
| 6 C  | -3.507872580000 | 1.826522114000 | -1.178759454000 | R=2.00 |
| 7 H  | -3.178364353000 | 1.253442692000 | 0.887392381700  | R=1.30 |
| 8 H  | -3.726114979000 | 3.512887891000 | 1.528788055000  | R=1.30 |
| 9 H  | -3.072925353000 | 4.194070744000 | -0.008116234033 | R=1.30 |
| 10 O | 0.426260877600  | 2.752359675000 | 1.087867281000  | R=1.72 |
| 11 H | -3.128380876000 | 2.556388236000 | -1.906092323000 | R=1.30 |
| 12 H | -4.591435372000 | 1.972204234000 | -1.067384742000 | R=1.30 |
| 13 H | -3.338380859000 | 0.810827011800 | -1.556824384000 | R=1.30 |

END

GUIBONDS

1 2 3 1.0  
2 3 4 1.0  
3 4 5 1.0  
4 5 1 1.0  
5 1 2 1.0  
6 6 2 1.0  
7 7 2 1.0  
8 8 3 1.0  
9 9 3 1.0  
10 10 5 2.0  
11 11 6 1.0  
12 12 6 1.0  
13 13 6 1.0

END

SOLVATION

Surf Delley



Div ndiv=4  
Solvent name=CRS cav0=0.0 cav1=0.0  
Charged method=CONJ conv=1.00E-06 iter=300 corr  
C-Mat EXACT  
SCF VAR ALL  
CSMRSP  
END

BASIS  
type TZP  
core Small  
createoutput None  
END

XC  
GGA Becke Perdew  
END

RELATIVISTIC Scalar ZORA

GEOMETRY  
branch New  
iterations 100  
END

SCF  
iterations 50  
mixing 0.2  
diis  
END

BeckeGrid  
Quality Good  
End

ZlmFit  
Quality Normal  
End

ALLPOINTS  
NOPRINT LOGFILE

eor

```
# =====  
# COSKF  
# =====
```

```
rm -f COSKF  
"$ADFBIN/cpkf" TAPE21 COSKF COSMO
```

```
mv TAPE21 GASPHASE.t21
```

```
# COSMO-RS Solvent calculation
```

```
# =====  
# The Molecule  
# =====
```

```
"$ADFBIN/adf" <<eor  
TITLE pc
```

```
ATOMS
```

|      |                 |                |                 |        |
|------|-----------------|----------------|-----------------|--------|
| 1 O  | -1.380495289000 | 1.843682694000 | 0.048231311400  | R=1.72 |
| 2 C  | -2.848514110000 | 2.014037692000 | 0.166768492800  | R=2.00 |
| 3 C  | -2.952092331000 | 3.419929231000 | 0.761616886300  | R=2.00 |
| 4 O  | -1.650485034000 | 3.621624948000 | 1.399142265000  | R=1.72 |
| 5 C  | -0.768516116500 | 2.737676572000 | 0.861450333400  | R=2.00 |
| 6 C  | -3.507872580000 | 1.826522114000 | -1.178759454000 | R=2.00 |
| 7 H  | -3.178364353000 | 1.253442692000 | 0.887392381700  | R=1.30 |
| 8 H  | -3.726114979000 | 3.512887891000 | 1.528788055000  | R=1.30 |
| 9 H  | -3.072925353000 | 4.194070744000 | -0.008116234033 | R=1.30 |
| 10 O | 0.426260877600  | 2.752359675000 | 1.087867281000  | R=1.72 |
| 11 H | -3.128380876000 | 2.556388236000 | -1.906092323000 | R=1.30 |
| 12 H | -4.591435372000 | 1.972204234000 | -1.067384742000 | R=1.30 |
| 13 H | -3.338380859000 | 0.810827011800 | -1.556824384000 | R=1.30 |

```
END
```

```
GUIBONDS
```

```
1 2 3 1.0
```

```
2 3 4 1.0
```

3 4 5 1.0  
4 5 1 1.0  
5 1 2 1.0  
6 6 2 1.0  
7 7 2 1.0  
8 8 3 1.0  
9 9 3 1.0  
10 10 5 2.0  
11 11 6 1.0  
12 12 6 1.0  
13 13 6 1.0  
END

SOLVATION

Surf Delley  
Div ndiv=4  
Solvent name=CRS cav0=0.0 cav1=0.0  
Charged method=CONJ conv=1.00E-06 iter=300 corr  
C-Mat EXACT  
SCF VAR ALL  
CSMRSP

END

BASIS

type TZP  
core Small  
createoutput None  
END

XC

GGA Becke Perdew  
END

RELATIVISTIC Scalar ZORA

RESTART GASPHASE.t21

SCF

iterations 50  
mixing 0.2  
diis  
END

BeckeGrid

Quality Good  
End

ZlmFit  
Quality Normal  
End

ALLPOINTS  
NOPRINT LOGFILE

eor

# =====  
# COSKF  
# =====

rm -f COSKF  
"\$ADFBIN/cpkf" TAPE21 COSKF COSMO
