# Supplementary material for: Screening of metal complexes and organic solvents using the COSMOSAC-LANL model to enhance the energy density in a non-aqueous redox flow cell: an insight into the solubility
Source: Royal Society of Chemistry journal article supplement (doi:10.1039/d1cp02591k), 2021-01-01
Supplement: d1cp02591k2.pdf [file d1cp02591k2.pdf]

Supporting Information

**Screening of metal complexes and organic solvents using COSMOSAC-LANL model to enhance the energy density in non-aqueous redox flow cell: an insight into the solubility**

Anwesa Karmakar<sup>\*†</sup>, Rangachary Mukundan<sup>‡</sup>, Ping Yang<sup>\*†</sup> and Enrique R. Batista<sup>\*†</sup>

<sup>†</sup>Theoretical Division, Los Alamos National Laboratory, Los Alamos 87545

<sup>‡</sup>MPA-11 Division, Los Alamos National Laboratory, Los Alamos 87545

\*E-mail: anwesa.karmakar@gmail.com; pyang@lanl.gov; erb@lanl.gov

# 1 Error estimation from coefficient of determination ( $R^2$ )

For a linear function,  $y = (y_1 \cdots \cdots y_n)$  of input  $x = (x_1 \cdots \cdots x_n)$ , the  $a$  and  $b$  of smallest residual is

$$(a, b) = \underset{i}{\operatorname{argmin}} \sum (y_i - ax_i - b)^2, \quad (1)$$

which gives you  $a = \operatorname{argmin} \operatorname{var}(y - ax)$ ,  $b = \bar{y} - a\bar{x}$  and  $R^2 = \frac{\operatorname{var}(ax)}{\operatorname{var}(y)} = \operatorname{corr}(x, y)$ , where for any two vectors  $u, v, \bar{u}$  is the empirical mean.  $\operatorname{var}(u)$  and  $\operatorname{corr}(u, v)$  the correlation.

Now,  $\operatorname{var}(y - ax)$  is equal to  $(1-R^2)*\operatorname{var}(y)$ . By normalizing errors by  $\operatorname{var}(y)$ , one will obtain

$$\operatorname{Error} = \frac{\operatorname{var}(y - ax)}{\operatorname{var}(y)} = 1 - R^2. \quad (2)$$

Now ‘error’ is the root mean error divided by the standard deviation of the output and which is  $\sqrt{\operatorname{Error}}$ .

Table S 1: The details of COSMO setting for the metal complexes

|                                                                                                                                                                                                                                                                                                                                                                                                                                                                                                                                                                                                                                                                                                                                                                                              |                                                                                                                                                                                                                                                                                                                                                                                                                                                                                                                                                                                                                                                                                                            |
|----------------------------------------------------------------------------------------------------------------------------------------------------------------------------------------------------------------------------------------------------------------------------------------------------------------------------------------------------------------------------------------------------------------------------------------------------------------------------------------------------------------------------------------------------------------------------------------------------------------------------------------------------------------------------------------------------------------------------------------------------------------------------------------------|------------------------------------------------------------------------------------------------------------------------------------------------------------------------------------------------------------------------------------------------------------------------------------------------------------------------------------------------------------------------------------------------------------------------------------------------------------------------------------------------------------------------------------------------------------------------------------------------------------------------------------------------------------------------------------------------------------|
| <p>XC potential in SCF: <b>GGA: BP</b><br/>           XC energy after SCF: <b>Default</b><br/>           Relativity (ZORA): <b>Scalar</b><br/>           XC: <b>Becke Perdew</b><br/>           Basis set: <b>TZP</b><br/>           Frozen core: <b>Small</b><br/>           Integration: <b>Becke Good</b><br/>           Density used in exchange potential: <b>Exact</b><br/>           Total charge: <b>0.0</b><br/>           Spin polarization: <b>2.0 - 3.0</b><br/>           Coordinates used for optimization: <b>Delocalized</b><br/>           Optimization method: <b>new</b><br/>           Number of geometry iterations: <b>100</b><br/>           Maximum no of SCF cycles: <b>50</b><br/>           Convergence method: <b>DIIS</b><br/>           Mixing: <b>0.2</b></p> | <p>Solvation method: <b>COSMO</b><br/>           Solvent: <b>CRS</b><br/>           Default radii: <b>Klamt</b><br/>           Surface: <b>Delley</b><br/>           Ndiv: <b>4</b><br/>           Charge determination method: <b>CONJ</b><br/>           Convergence: <b>1.00E-06</b><br/>           Max. iterations: <b>300</b><br/>           Correct for outlying charge: <b>Yes</b><br/>           Calculate coulomb interaction: <b>EXACT</b><br/>           Disc scaling: <b>0.01</b><br/>           Disc Legendre order: <b>4</b><br/>           Disc tolerance: <b>0.1</b><br/>           Handle charges: <b>VAR</b><br/>           Charges in which SCF cycles: <b>ALL</b><br/>           —</p> |
|----------------------------------------------------------------------------------------------------------------------------------------------------------------------------------------------------------------------------------------------------------------------------------------------------------------------------------------------------------------------------------------------------------------------------------------------------------------------------------------------------------------------------------------------------------------------------------------------------------------------------------------------------------------------------------------------------------------------------------------------------------------------------------------------|------------------------------------------------------------------------------------------------------------------------------------------------------------------------------------------------------------------------------------------------------------------------------------------------------------------------------------------------------------------------------------------------------------------------------------------------------------------------------------------------------------------------------------------------------------------------------------------------------------------------------------------------------------------------------------------------------------|

Table S 2: The details of COSMO setting for the organic solvents

|                                                                                                                                                                                                                                                                                                                                                                                                                                                                                                                                                                                             |                                                                                                                                                                                                                                                                                                                                                                                                                                                                                                                 |
|---------------------------------------------------------------------------------------------------------------------------------------------------------------------------------------------------------------------------------------------------------------------------------------------------------------------------------------------------------------------------------------------------------------------------------------------------------------------------------------------------------------------------------------------------------------------------------------------|-----------------------------------------------------------------------------------------------------------------------------------------------------------------------------------------------------------------------------------------------------------------------------------------------------------------------------------------------------------------------------------------------------------------------------------------------------------------------------------------------------------------|
| XC potential in SCF: <b>GGA: BP</b><br>XC energy after SCF: <b>Default</b><br>Relativity (ZORA): <b>Scalar</b><br>XC: <b>Becke Perdew</b><br>Basis set: <b>TZP</b><br>Frozen core: <b>Small</b><br>Integration: <b>Becke Good</b><br>Density used in exchange potential: <b>Exact</b><br>Total charge: <b>0.0</b><br>Spin polarization: <b>0.0</b><br>Coordinates used for optimization: <b>Delocalized</b><br>Optimization method: <b>new</b><br>Number of geometry iterations: <b>100</b><br>Maximum no of SCF cycles: <b>50</b><br>Convergence method: <b>DIIS</b><br>Mixing: <b>0.2</b> | Solvation method: <b>COSMO</b><br>Solvent: <b>CRS</b><br>Default radii: <b>Klamt</b><br>Surface: <b>Delley</b><br>Ndiv: <b>4</b><br>Charge determination method: <b>CONJ</b><br>Convergence: <b>1.00E-06</b><br>Max. iterations: <b>300</b><br>Correct for outlying charge: <b>Yes</b><br>Calculate coulomb interaction: <b>EXACT</b><br>Disc scaling: <b>0.01</b><br>Disc Legendre order: <b>4</b><br>Disc tolerance: <b>0.1</b><br>Handle charges: <b>VAR</b><br>Charges in which SCF cycles: <b>ALL</b><br>– |
|---------------------------------------------------------------------------------------------------------------------------------------------------------------------------------------------------------------------------------------------------------------------------------------------------------------------------------------------------------------------------------------------------------------------------------------------------------------------------------------------------------------------------------------------------------------------------------------------|-----------------------------------------------------------------------------------------------------------------------------------------------------------------------------------------------------------------------------------------------------------------------------------------------------------------------------------------------------------------------------------------------------------------------------------------------------------------------------------------------------------------|

Table S 3: The details of frequency calculations.

|                   |                            |
|-------------------|----------------------------|
| Basis set         | TZP                        |
| Frozen Core       | Small                      |
| Task              | GO & Frequency calculation |
| XC                | Becke Perdew               |
| Frequency         | Analytical                 |
| Numerical quality | Excellent                  |

Table S 4: Margules parameters of metal complexes in acetonitrile organic solvent at 297 K , COSMO Volume and COSMO Surface

| Organic solvents | $\gamma_{12}$ | $A_{12}$ | $\gamma_{21}$ | $A_{21}$ | COSMO Volume ( $\text{\AA}^3$ ) | COSMO Surface ( $\text{\AA}^2$ ) |
|------------------|---------------|----------|---------------|----------|---------------------------------|----------------------------------|
| I                | 1.14          | 0.08     | 0.76          | -0.16    | 387.35                          | 357.69                           |
| II               | 1.058         | 0.03     | 0.75          | -0.17    | 383.47                          | 357.32                           |
| III              | 1.11          | 0.06     | 0.77          | -0.16    | 379.83                          | 353.29                           |
| IV               | 1.08          | 0.05     | 0.74          | -0.18    | 393.18                          | 351.10                           |
| V                | 0.96          | -0.02    | 0.73          | -0.19    | 389.56                          | 362.22                           |
| VI               | 0.54          | -0.36    | 0.43          | -0.49    | 769.95                          | 637.70                           |
| VII              | 1.82          | 0.35     | 0.47          | -0.44    | 830.02                          | 657.92                           |
| VIII             | 0.12          | -1.26    | 0.32          | -0.67    | 953.15                          | 798.82                           |
| IX               | 0.06          | -1.63    | 0.33          | -0.65    | 866.90                          | 728.61                           |
| X                | 0.02          | -2.30    | 0.27          | -0.78    | 1089.89                         | 921.52                           |
| XI               | 0.26          | -0.80    | 0.56          | -0.35    | 460.46                          | 411.09                           |
| XII              | 3.58          | 0.753    | 1.11          | 0.062    | 470.97                          | 421.89                           |
| XIII             | 0.12          | -1.27    | 0.45          | -0.47    | 520.23                          | 460.10                           |

Table S 5: Margules parameters of  $V(\text{acac})_3$  in 14 different organic solvents at 297 K.

| Numbers | Organic solvents  | $\gamma_{12}$ | $A_{12}$ | $\gamma_{21}$ | $A_{21}$ |
|---------|-------------------|---------------|----------|---------------|----------|
| 1       | Cyclohexane       | 73.63         | 2.54     | 2.61          | 0.57     |
| 2       | Diisopropyl Ether | 1.47          | 0.23     | 1.13          | 0.07     |
| 3       | 1-Butanol         | 2.07          | 0.43     | 1.87          | 0.37     |
| 4       | 1-Hexanol         | 2.76          | 0.60     | 2.28          | 0.49     |
| 5       | 1-Hexyne          | 0.50          | -0.41    | 0.73          | -0.19    |
| 6       | 1-Heptyne         | 0.74          | -0.18    | 0.87          | -0.08    |
| 7       | 1-Hexene          | 8.29          | 1.25     | 1.74          | 0.33     |
| 8       | Benzene           | 1.38          | 0.19     | 0.90          | -0.06    |
| 9       | 1,3do             | 0.44          | -0.48    | 0.66          | -0.25    |
| 10      | ACN               | 1.14          | 0.08     | 0.76          | -0.16    |
| 11      | DMPU              | 0.53          | -0.38    | 0.71          | -0.20    |
| 12      | GBL               | 0.70          | -0.21    | 0.82          | -0.11    |
| 13      | MA                | 0.54          | -0.36    | 0.71          | -0.21    |
| 14      | PC                | 1.72          | 0.32     | 1.08          | 0.05     |

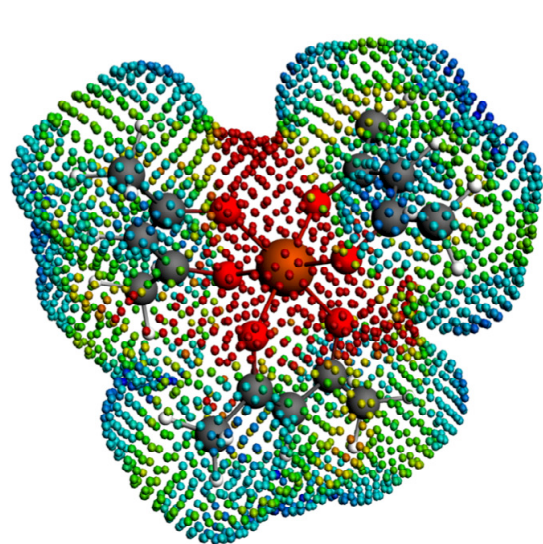

IV

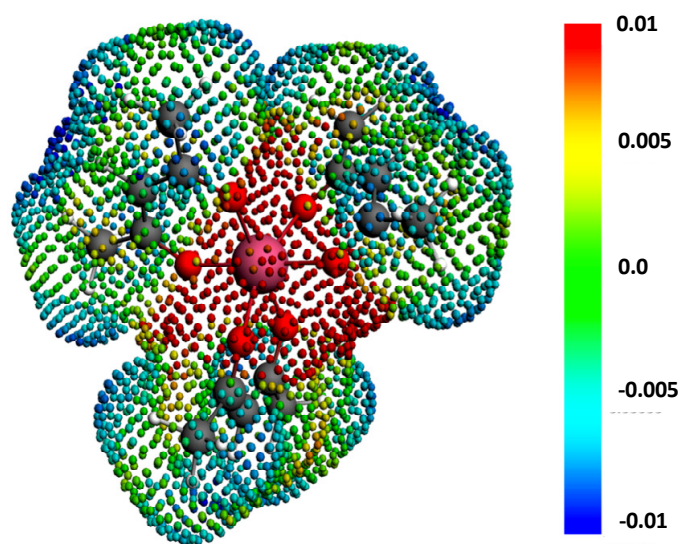

V

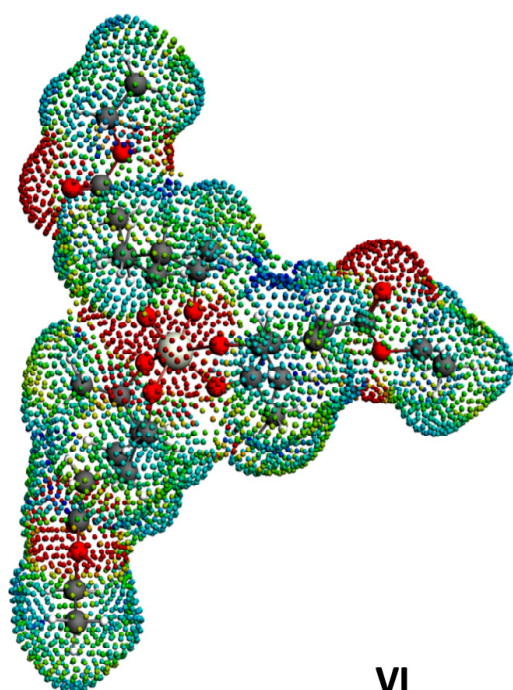

VI

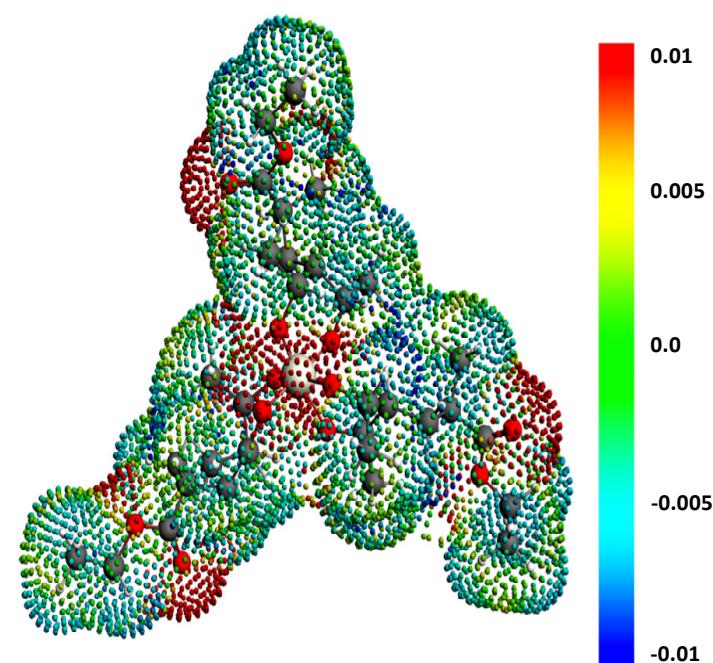

VII

Figure. S 1: COSMO Surface points of metal complexes.

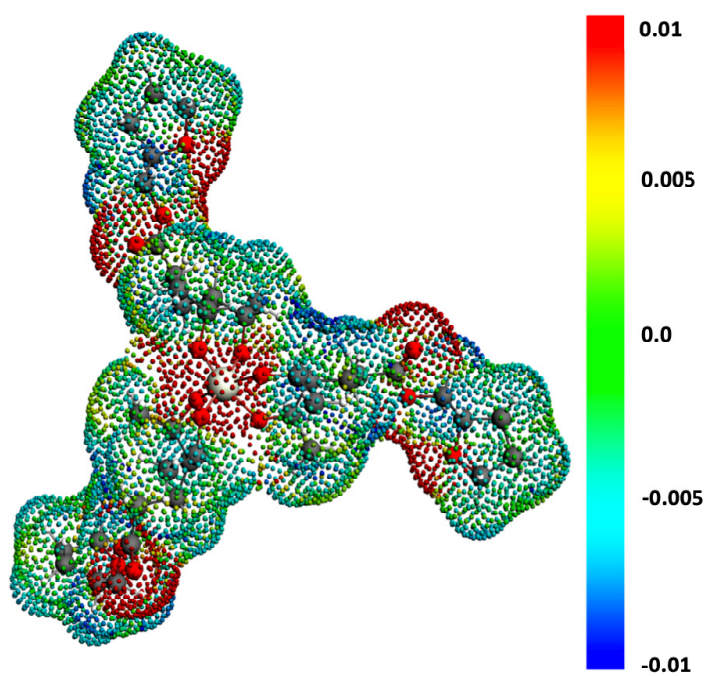

**VIII**

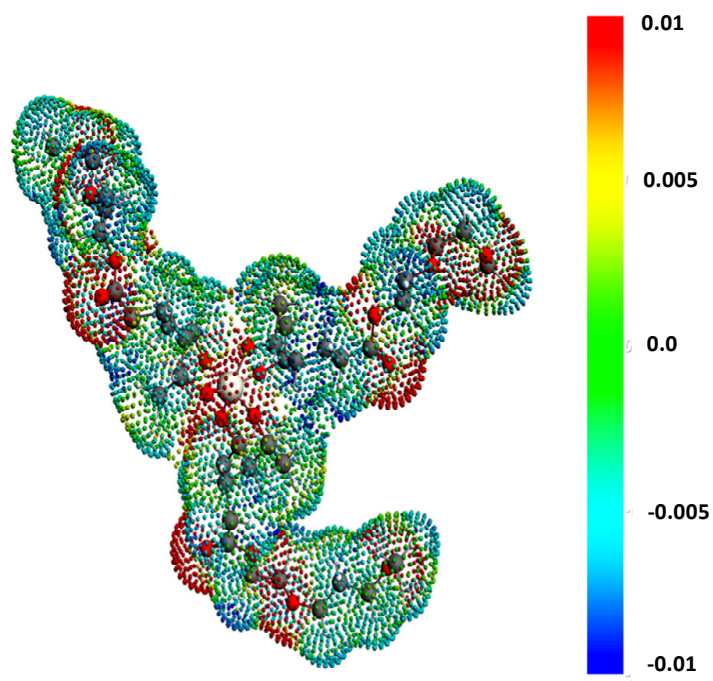

**X**

Figure. S 2: COSMO Surface points of metal complexes.

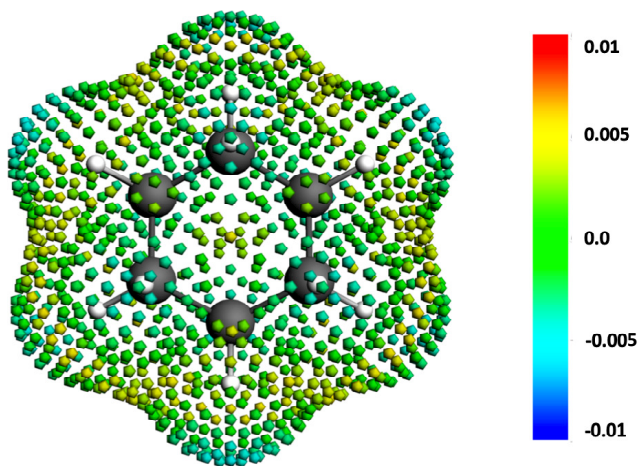

**Cyclohexane**

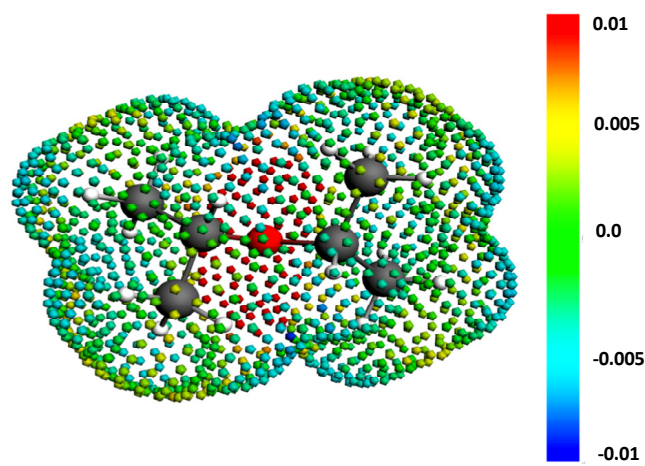

**Diisopropyl Ether**

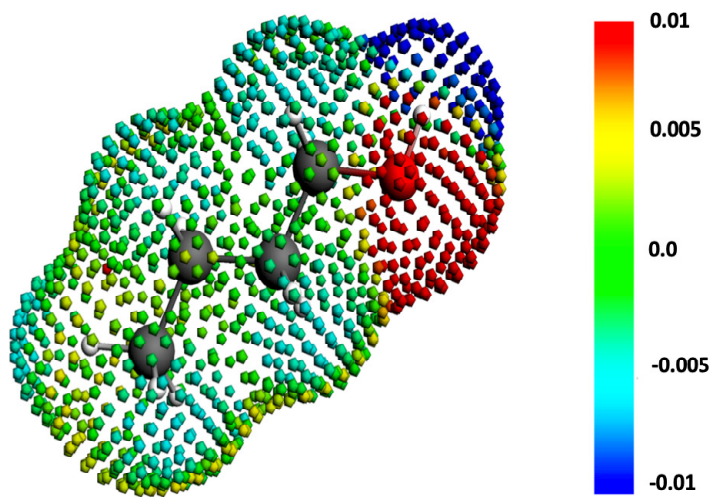

**1-Butanol**

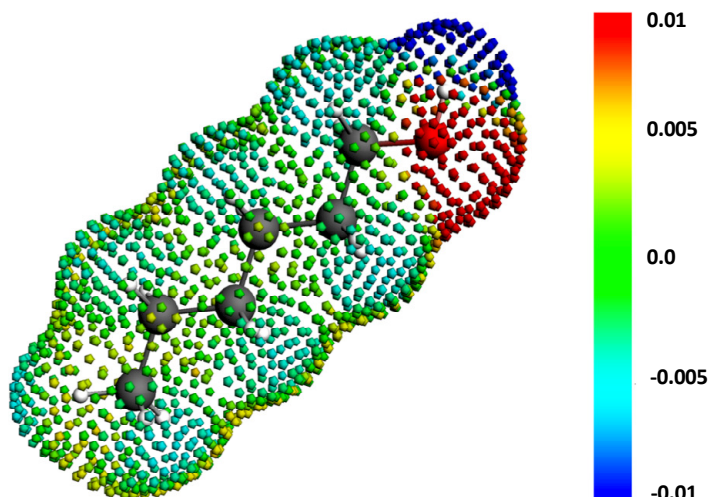

**1-Hexanol**

Figure. S 3: COSMO surface points of organic solvents.

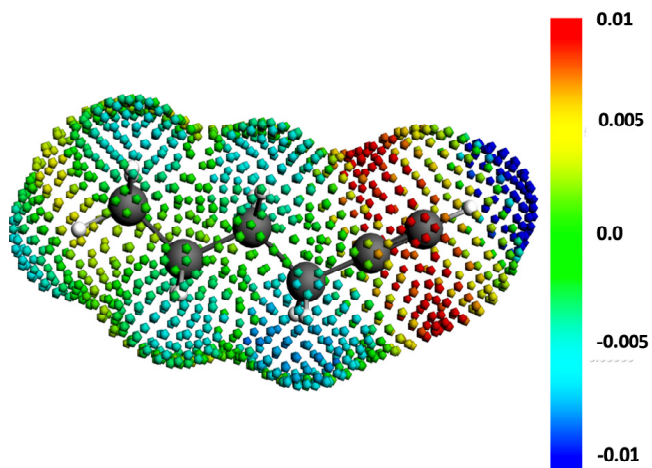

**1-Hexyne**

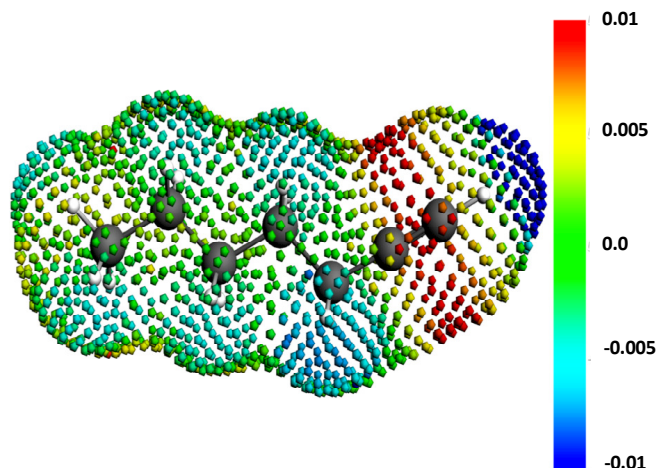

**1-Heptyne**

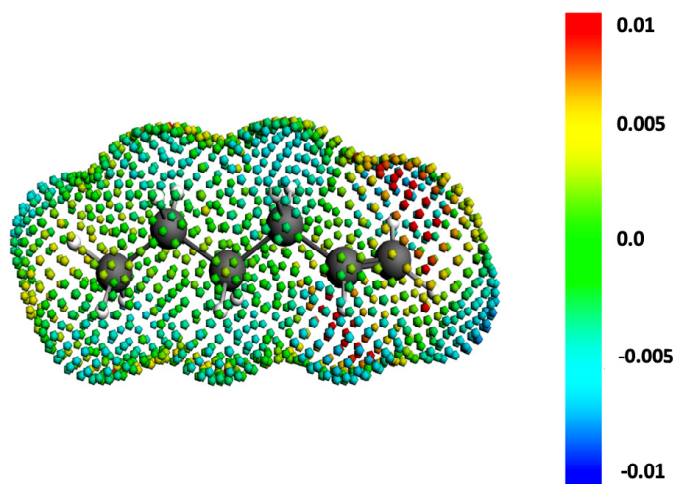

**1-Hexene**

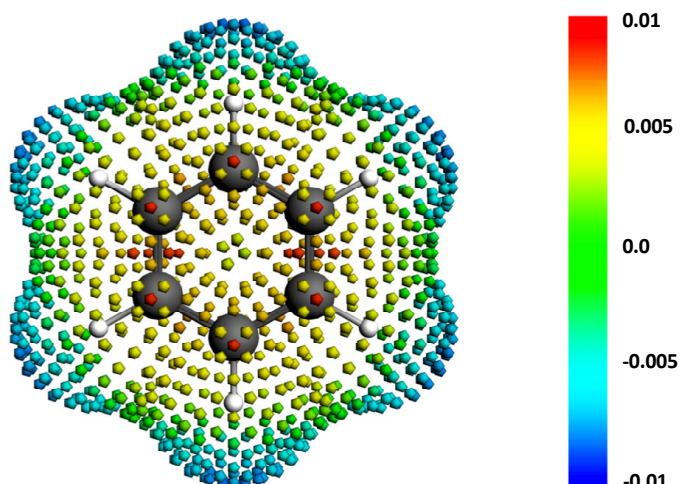

**Benzene**

Figure. S 4: COSMO surface points of organic solvents.



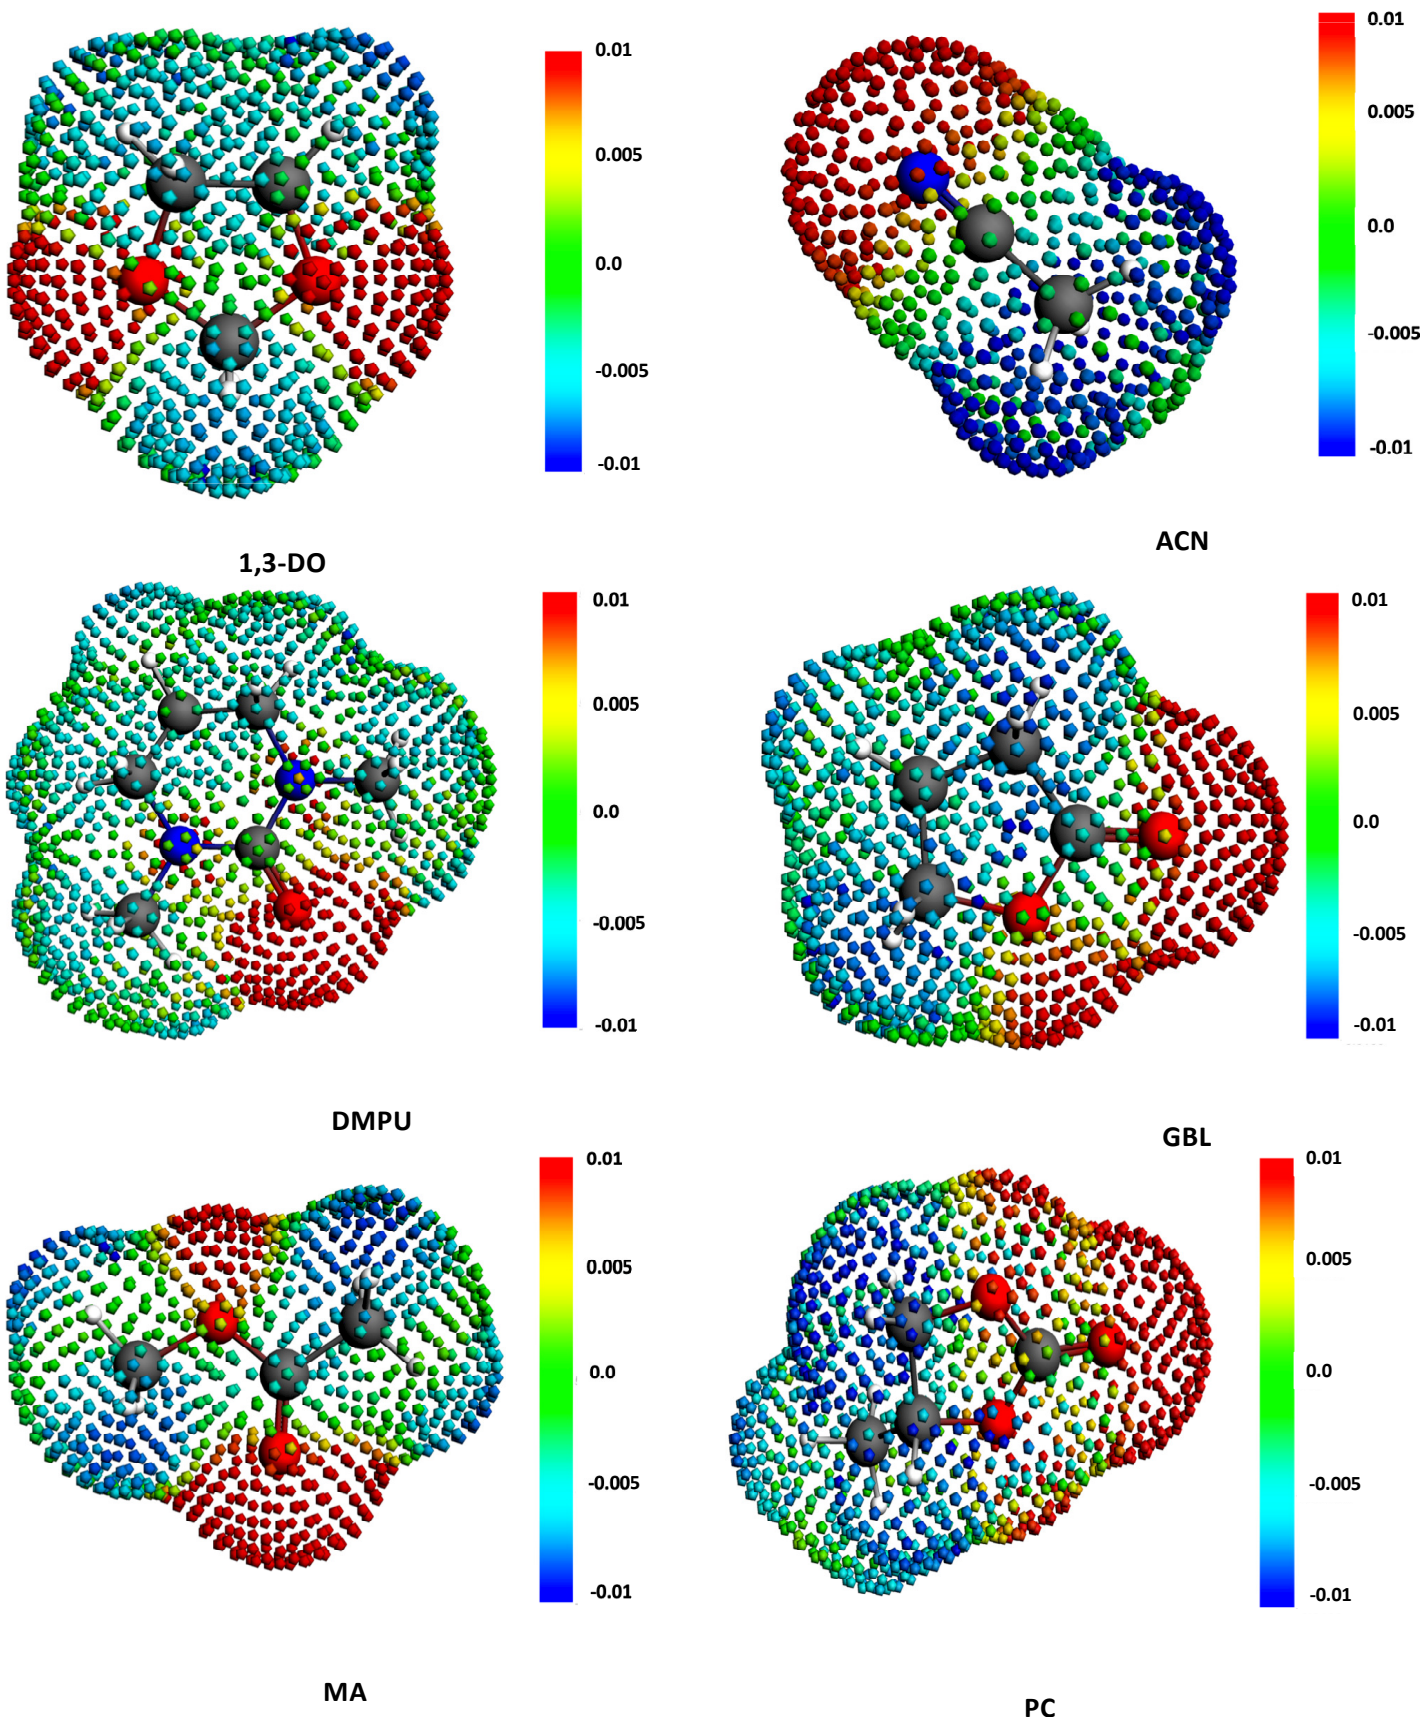

Figure. S 5: COSMO surface points of organic solvents.

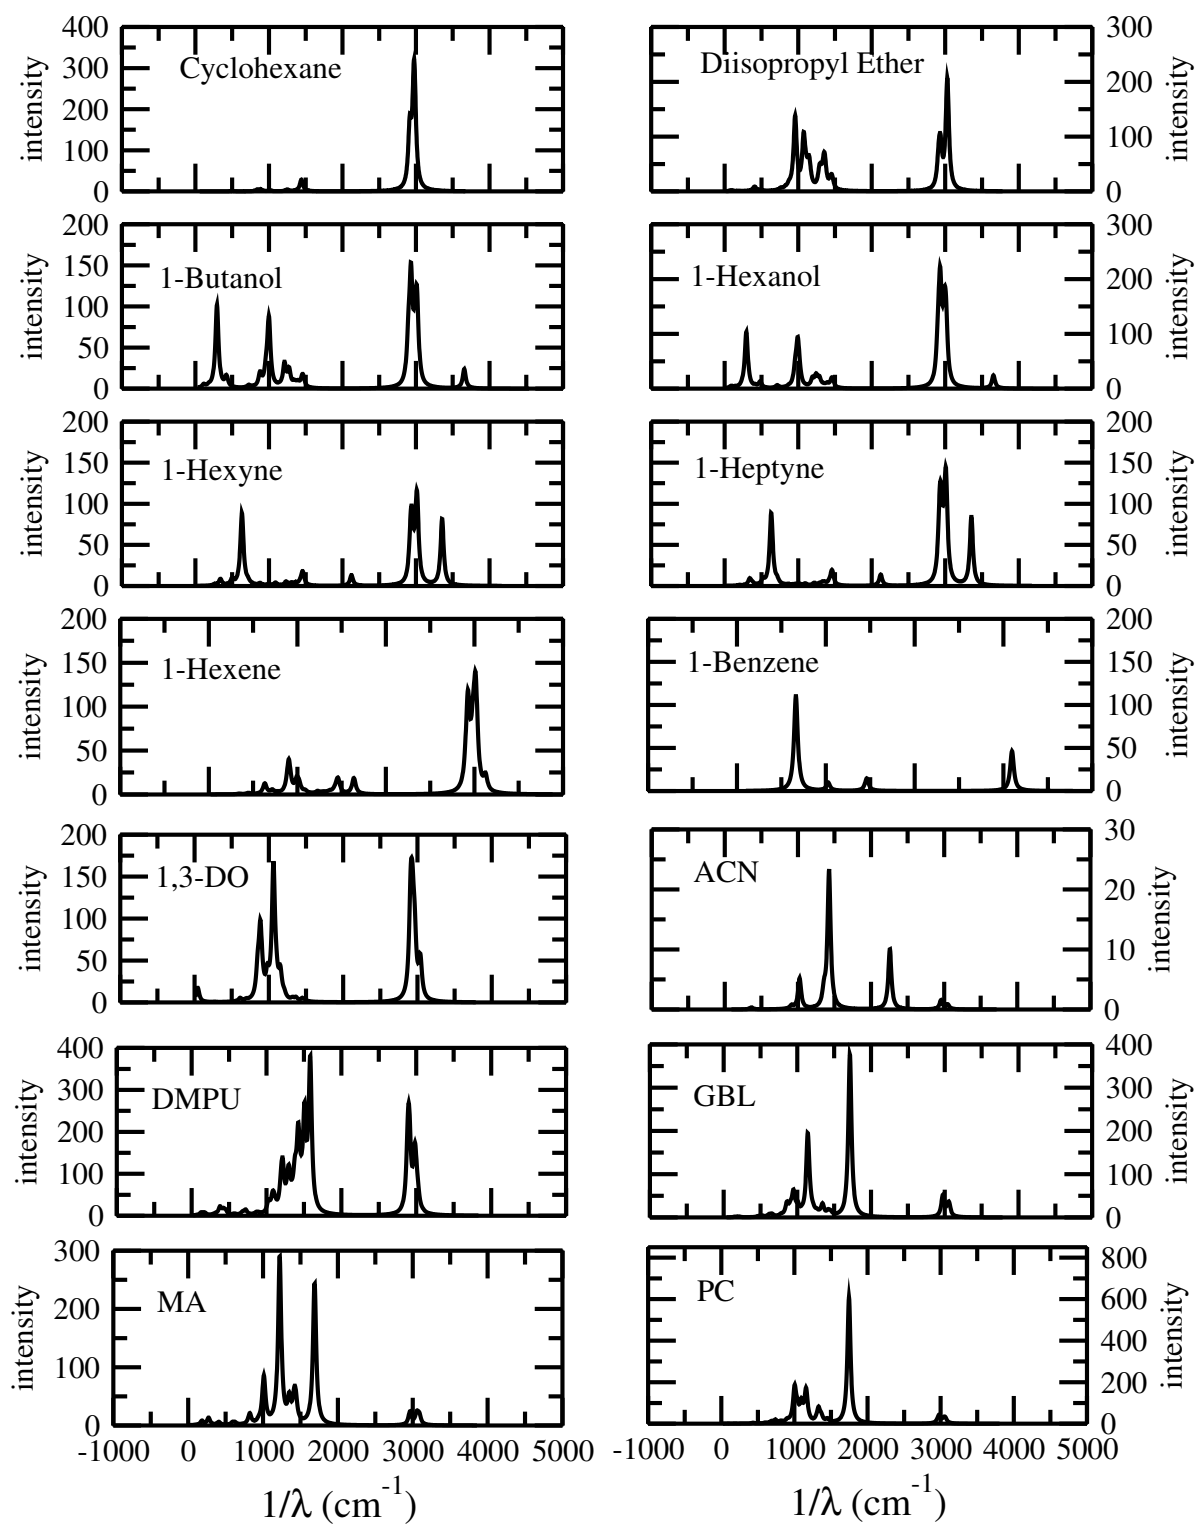

Figure. S 6: Analytical frequency of 14 different organic solvents at ambient condition.

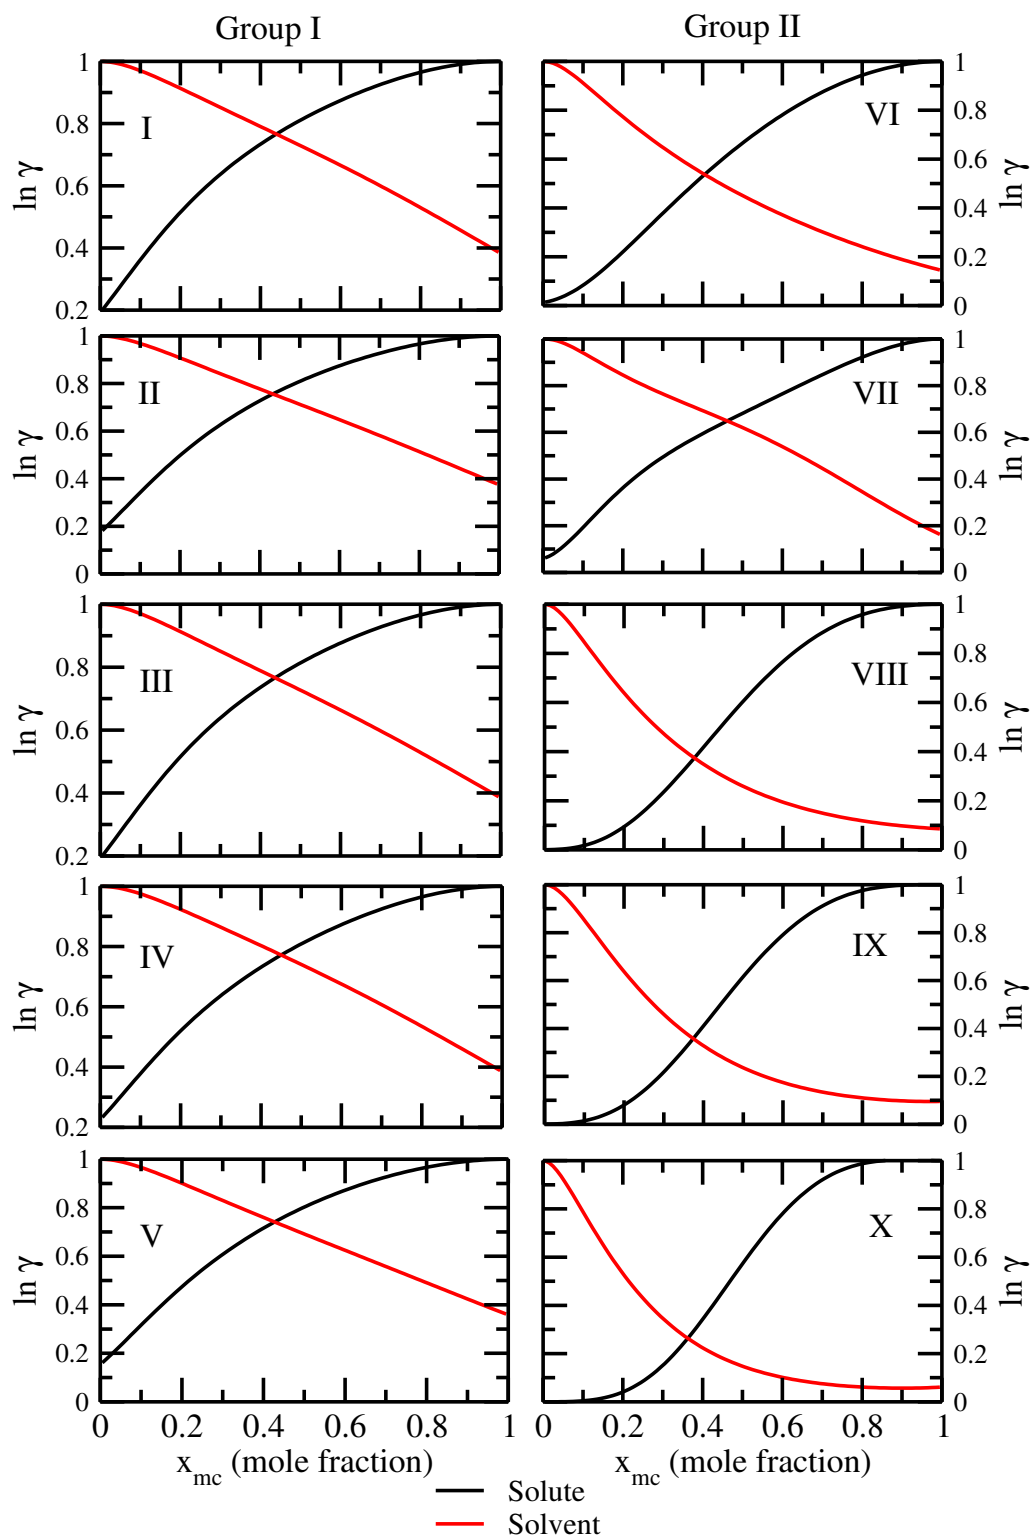

Figure. S 7: Gibbs-Duhem relationship of Group I and II type of metal complexes in acetonitrile solvent. The black curve is for the solute and the red curve is for the solvent.

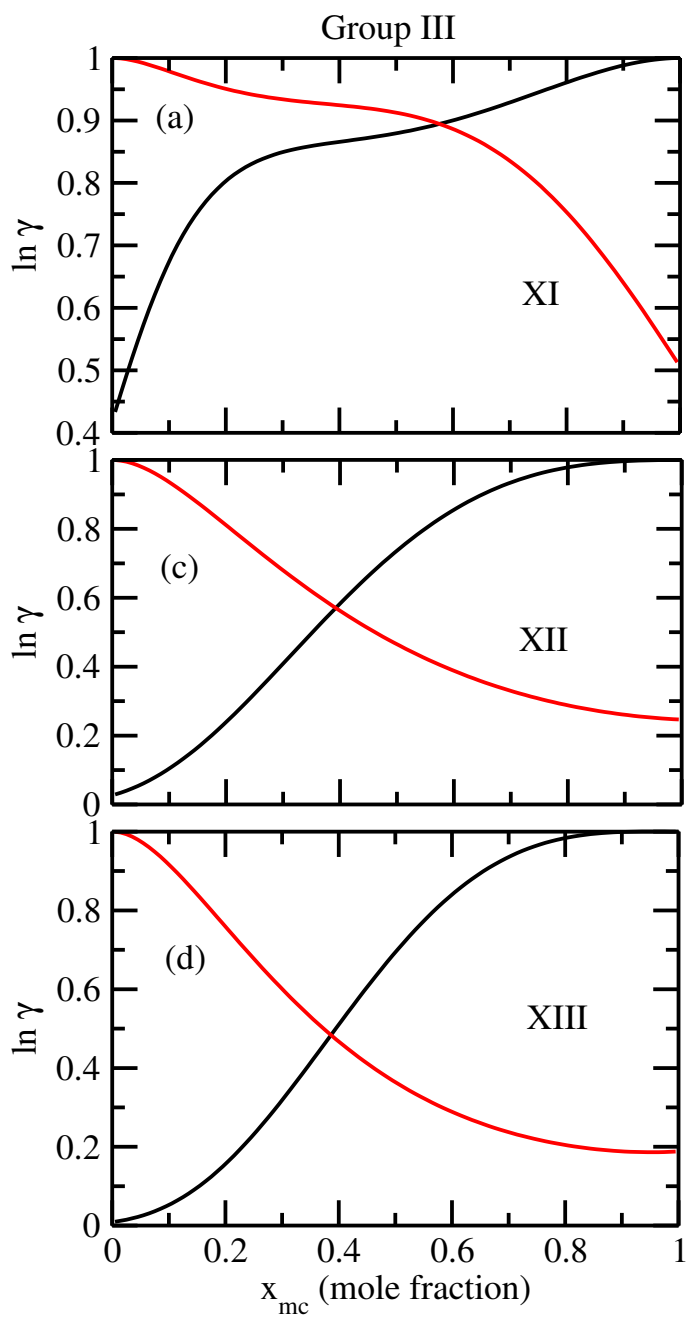

Figure. S 8: Gibbs-Duhem relationship of Group III type of metal complexes in acetonitrile solvent. The black curve is for the solute and the red curve is for the solvent.

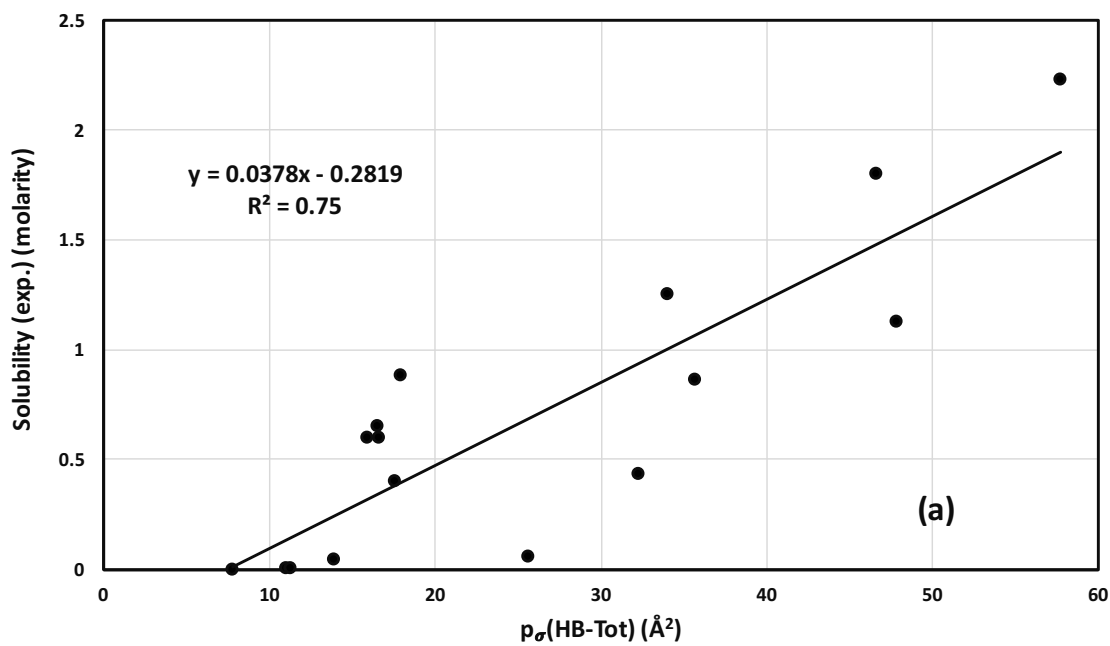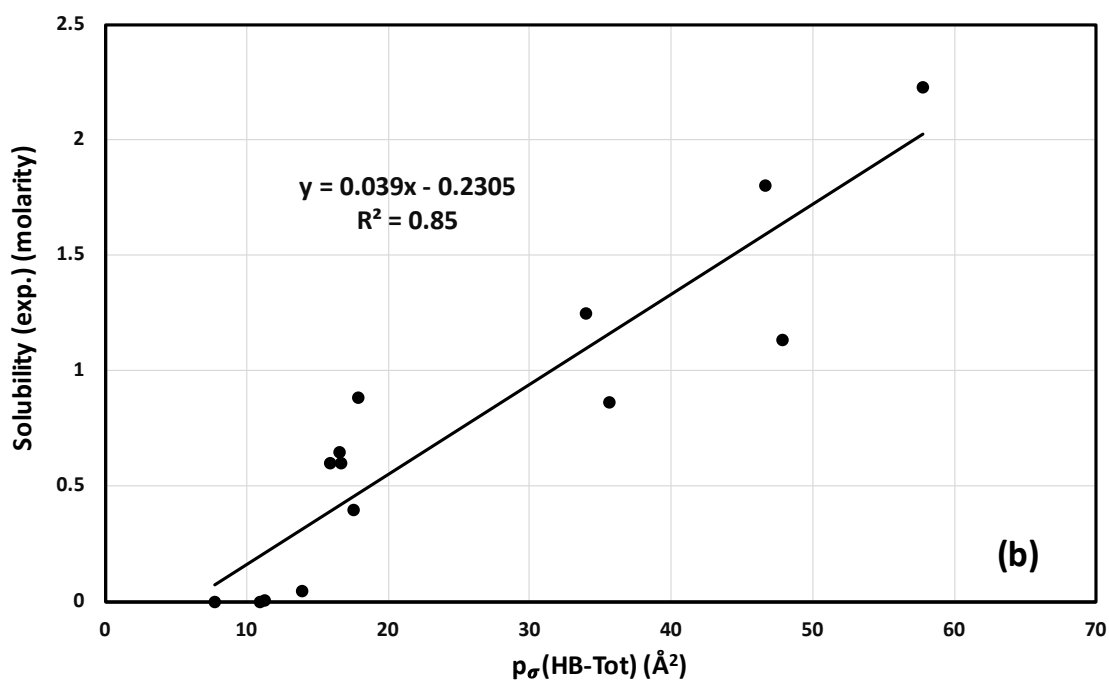

Figure. S 9: The experimental solubility vs  $p_{\sigma}(\text{HB-Tot})$  for (a) 16 different metal complexes and for (b) 14 different metal complexes for COSMOSAC-LANL model. The solubility is in molarity.

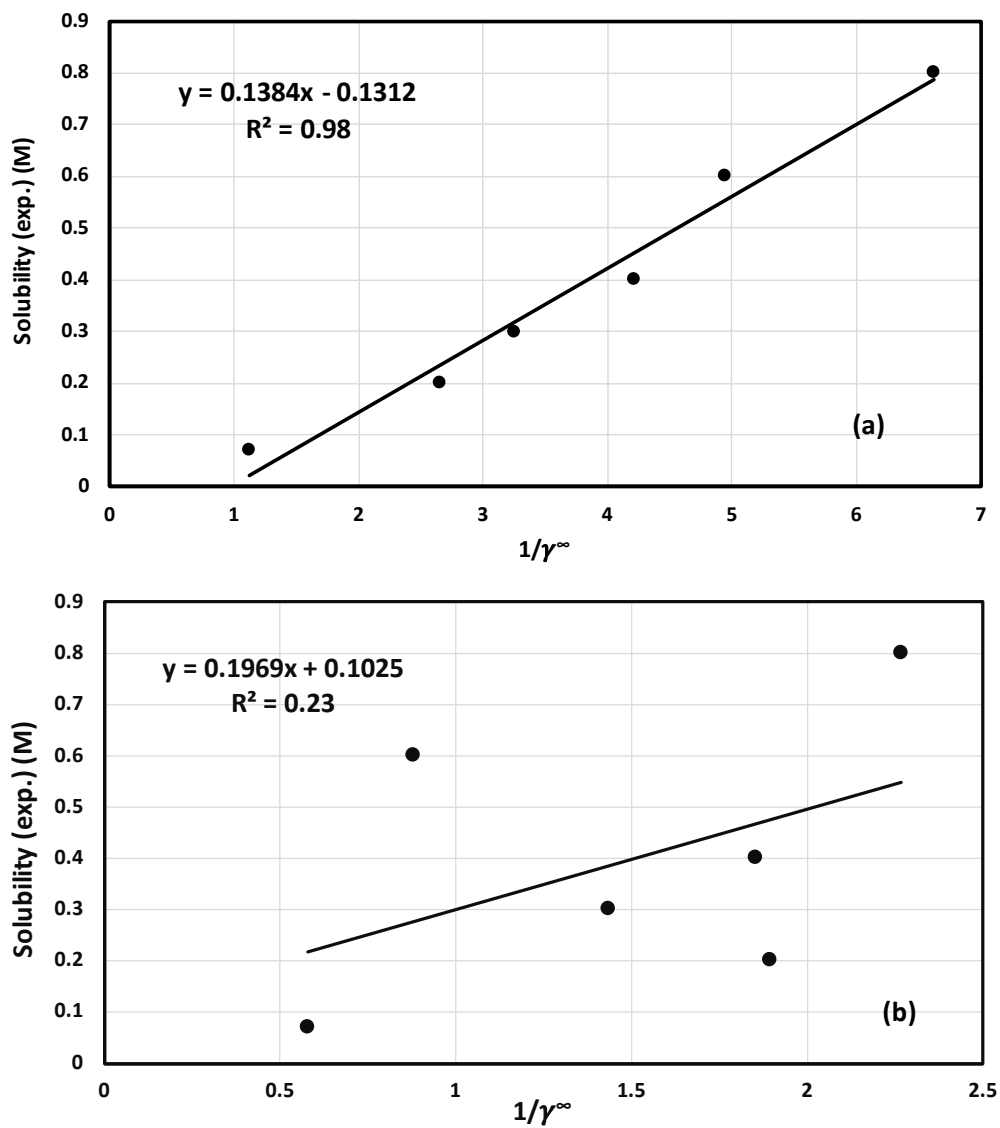

Figure. S 10: In fig. (a) and (b), the experimental solubility has been plotted as a function of  $1/\gamma_{i/S}^\infty$  for the COSMOSAC-LANL and COSMOSAC-2013 model, respectively. These results have been shown for a particular metal complex  $V(\text{acac})_3$  in 6 different organic solvents. The solubility is in molarity unit.

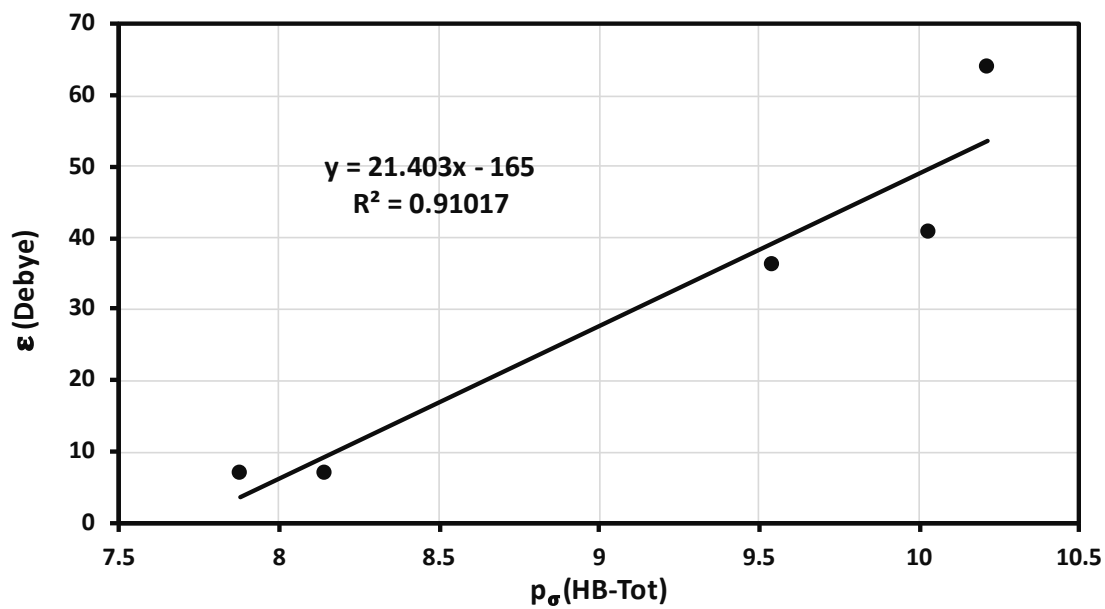

Figure. S 11:  $\epsilon$  vs  $p_{\sigma}(\text{HB-Tot})$  for 1,3do, MA, DMPU, GBL and PC solvents.

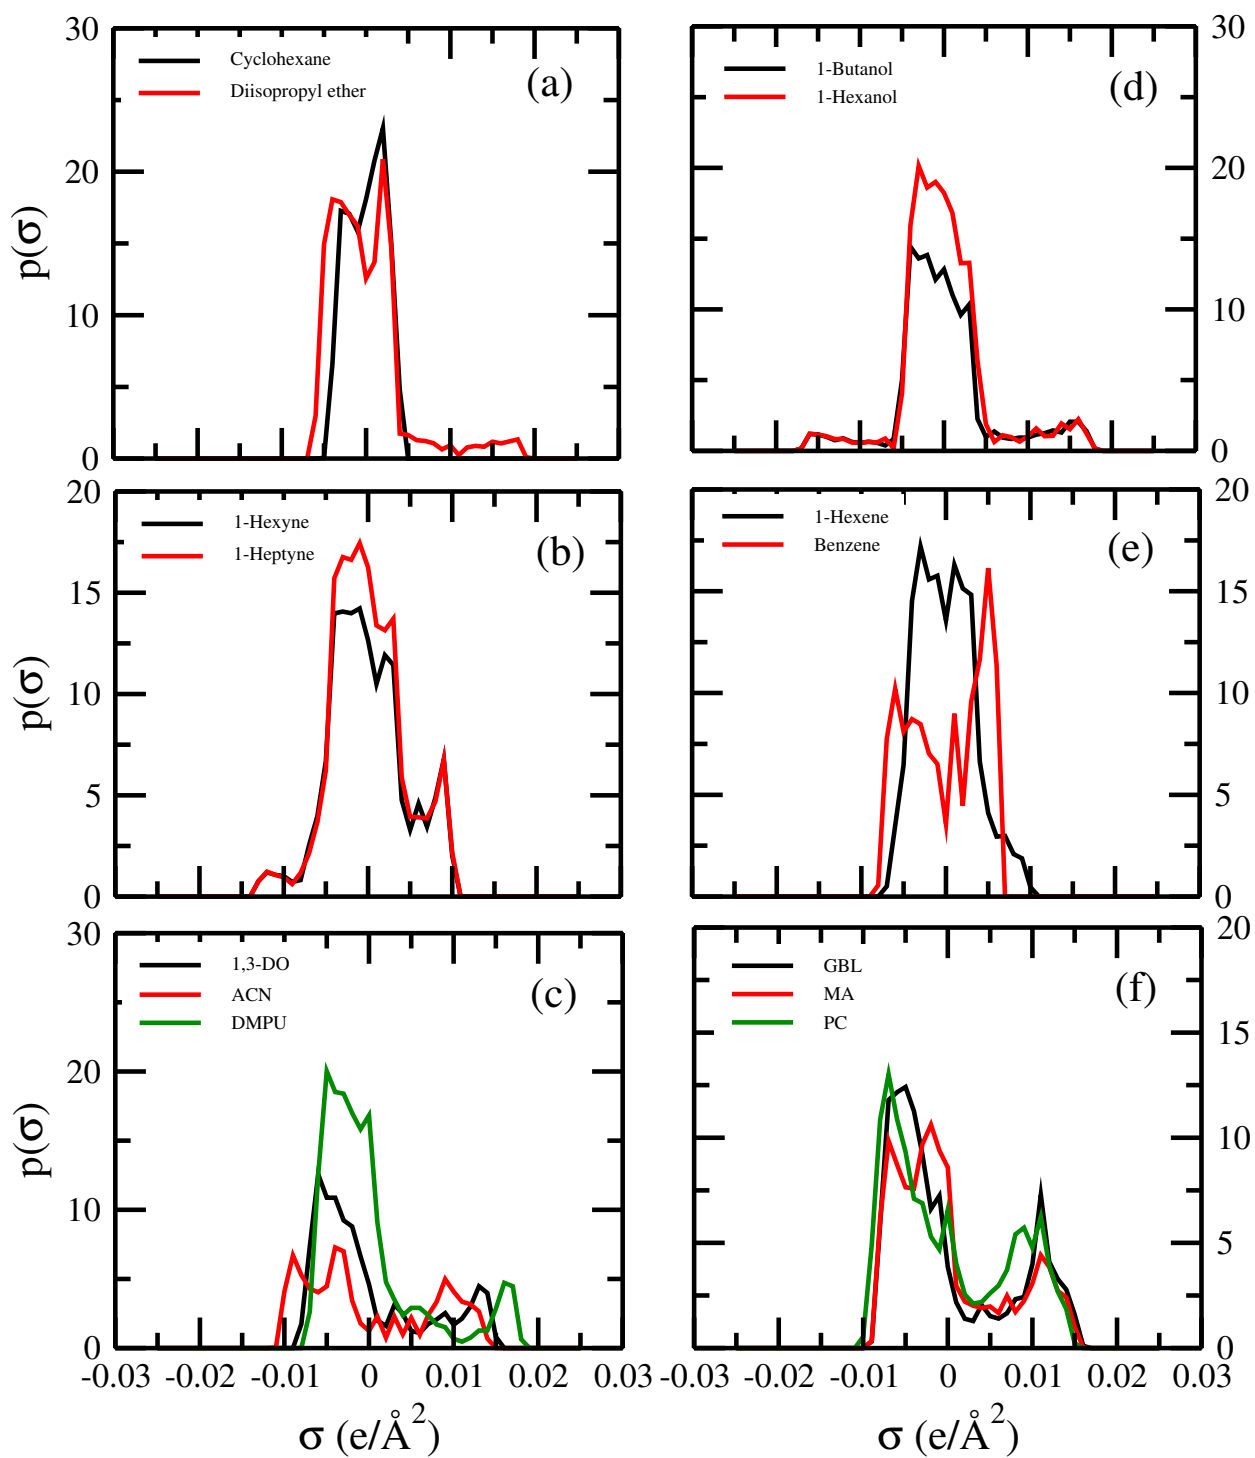

Figure. S 12: Total  $\sigma$  profile of 14 different organic solvents.



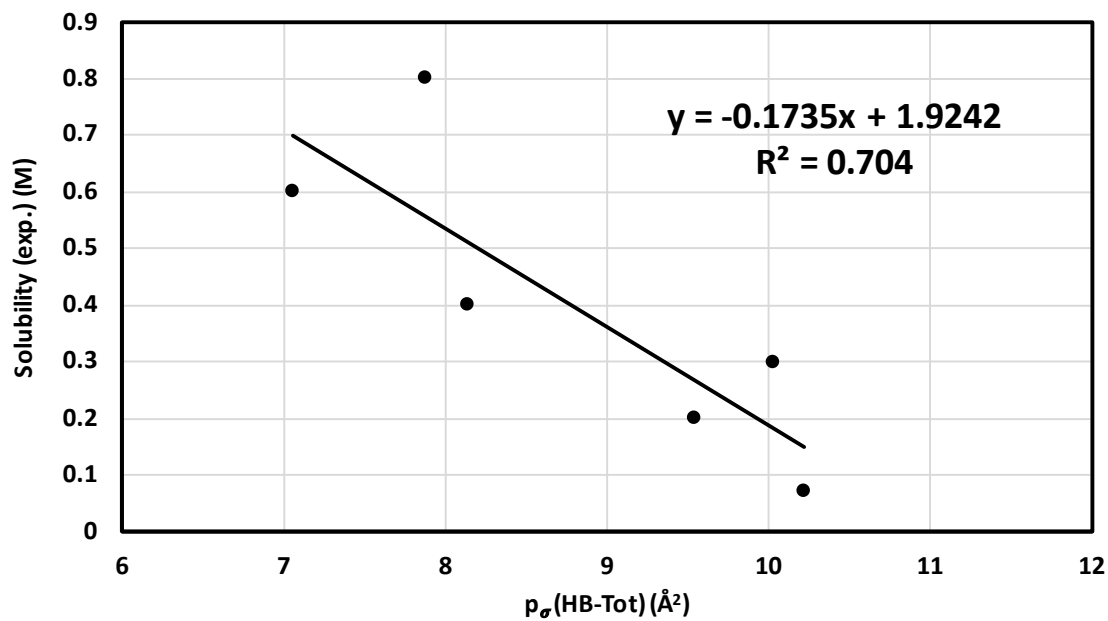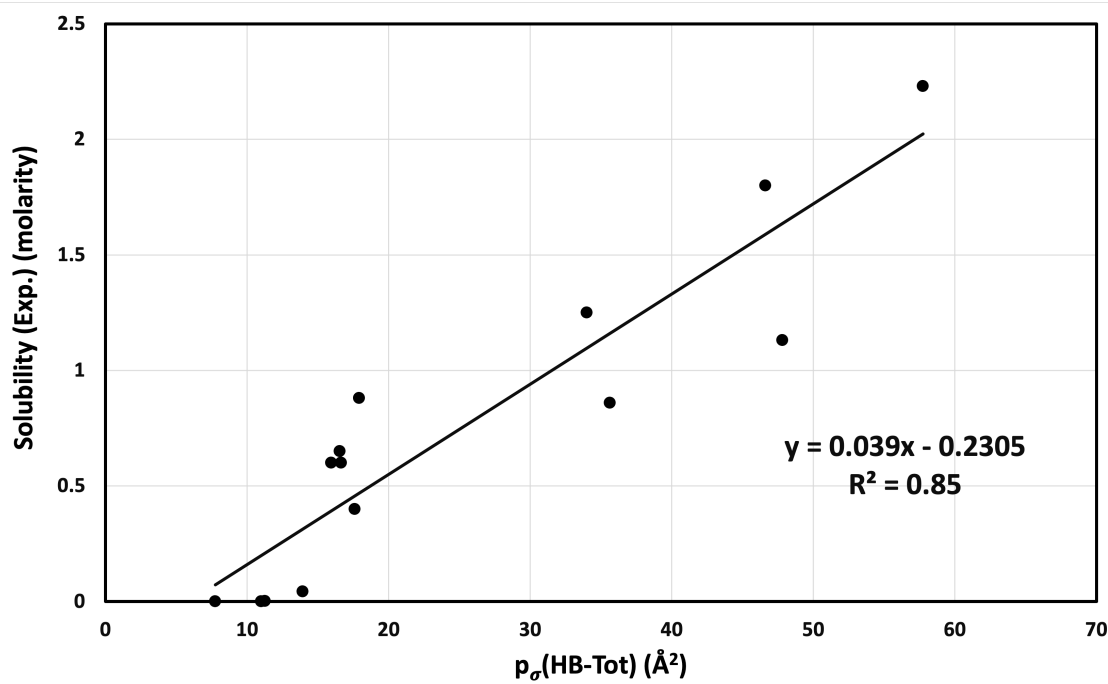

Figure. S 13: The experimental solubility vs  $p_{\sigma}(\text{HB})$  for (top)  $\text{V}(\text{acac})_3$  in 6 different organic solvents and (bottom) 14 different metal complexes in acetonitrile solvent, respectively. These two plots correspond to the  $14 \times 6$  (84) screening model.

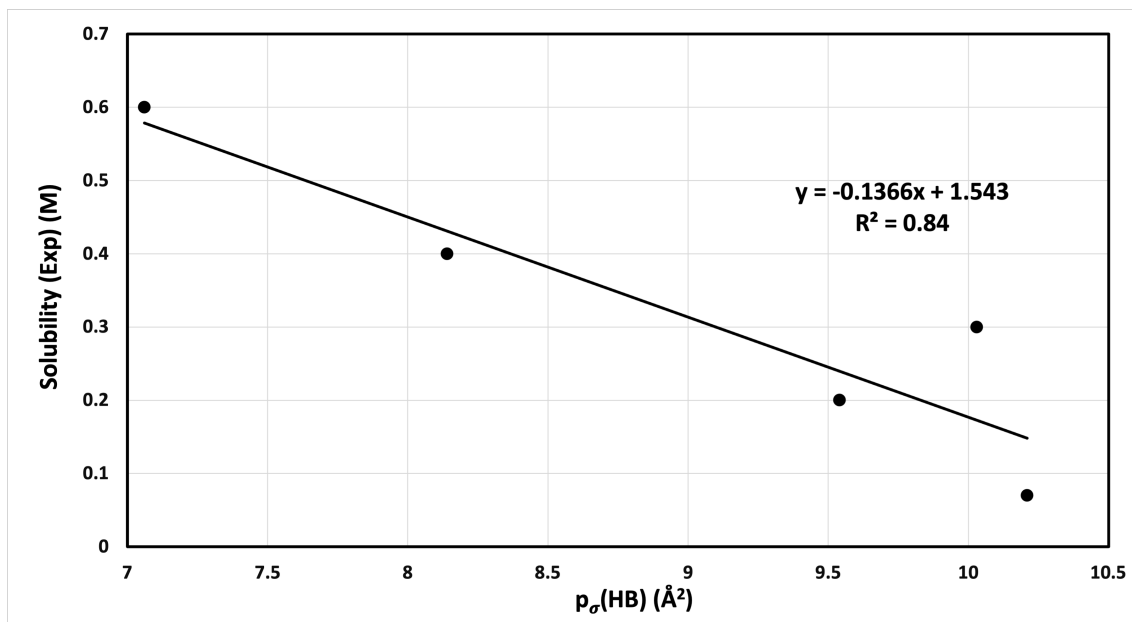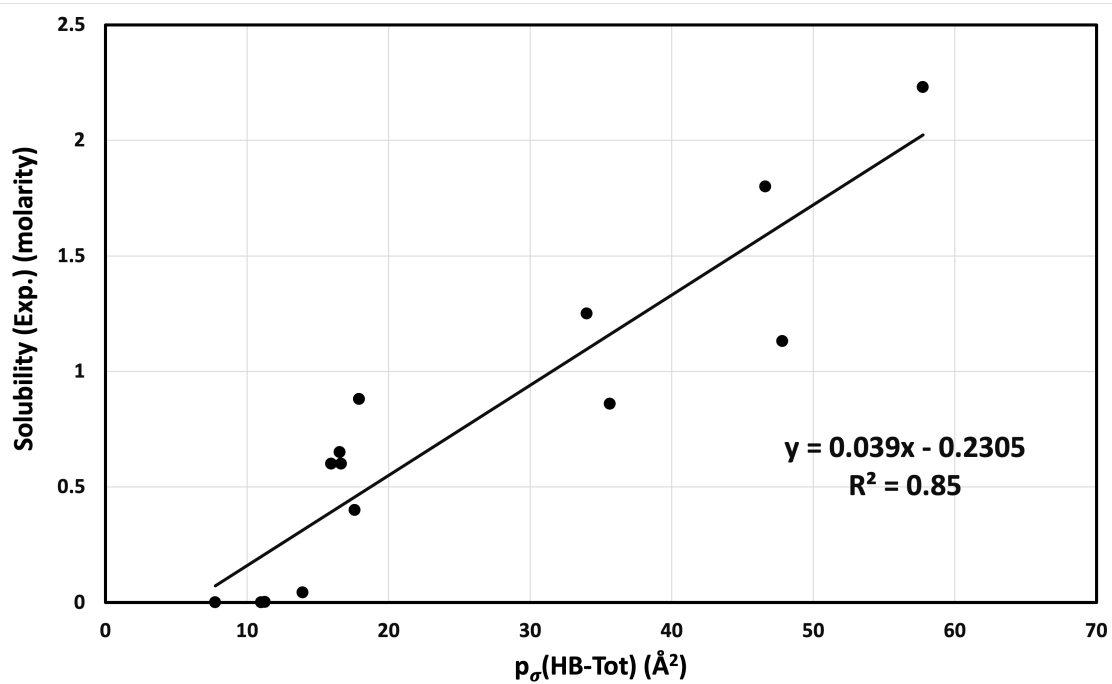

Figure. S 14: The experimental solubility vs  $p_{\sigma}(\text{HB})$  for (top)  $\text{V}(\text{acac})_3$  in 5 different organic solvents and (bottom) 14 different metal complexes in acetonitrile solvent, respectively. These two plots correspond to the  $14 \times 5$  (70) screening model.

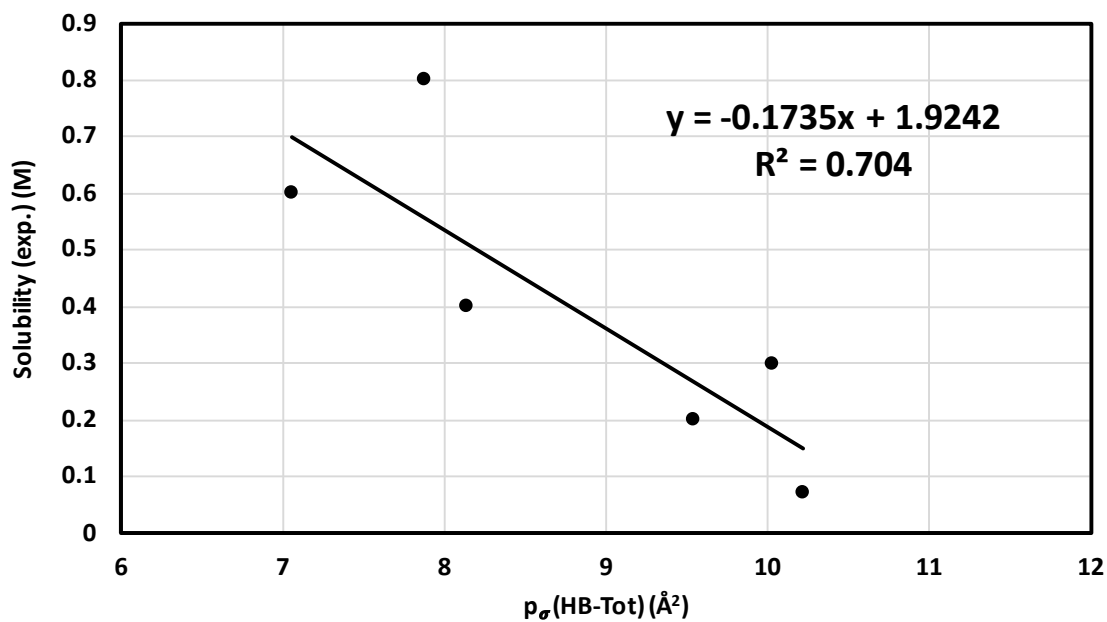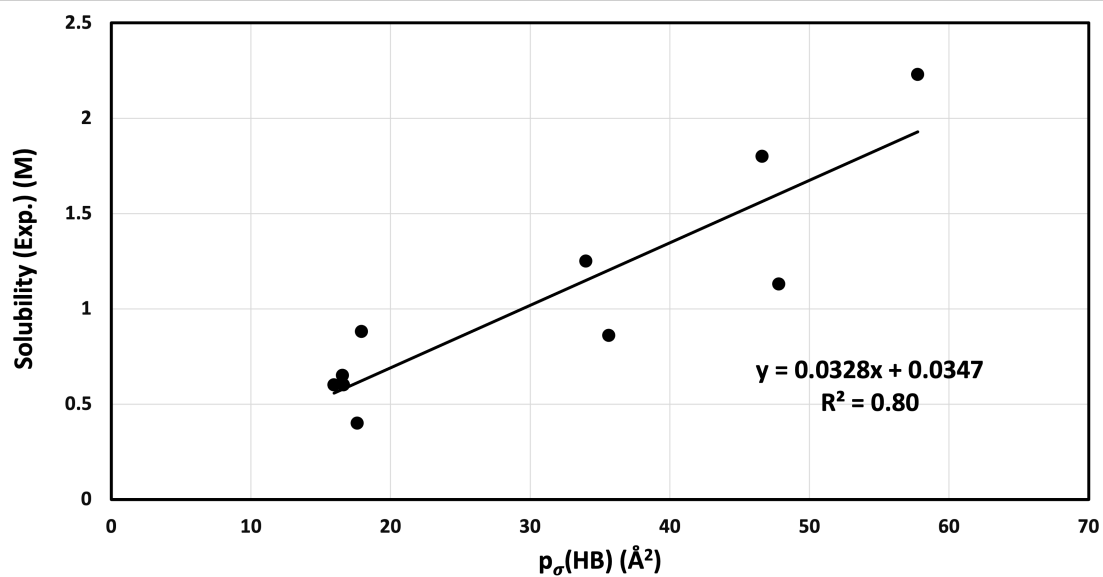

Figure. S 15: The experimental solubility vs  $p_{\sigma}(\text{HB})$  for (top)  $\text{V}(\text{acac})_3$  in 6 different organic solvents and (bottom) 10 different metal complexes in acetonitrile solvent, respectively. These two plots correspond to the  $10 \times 6$  (60) screening model.

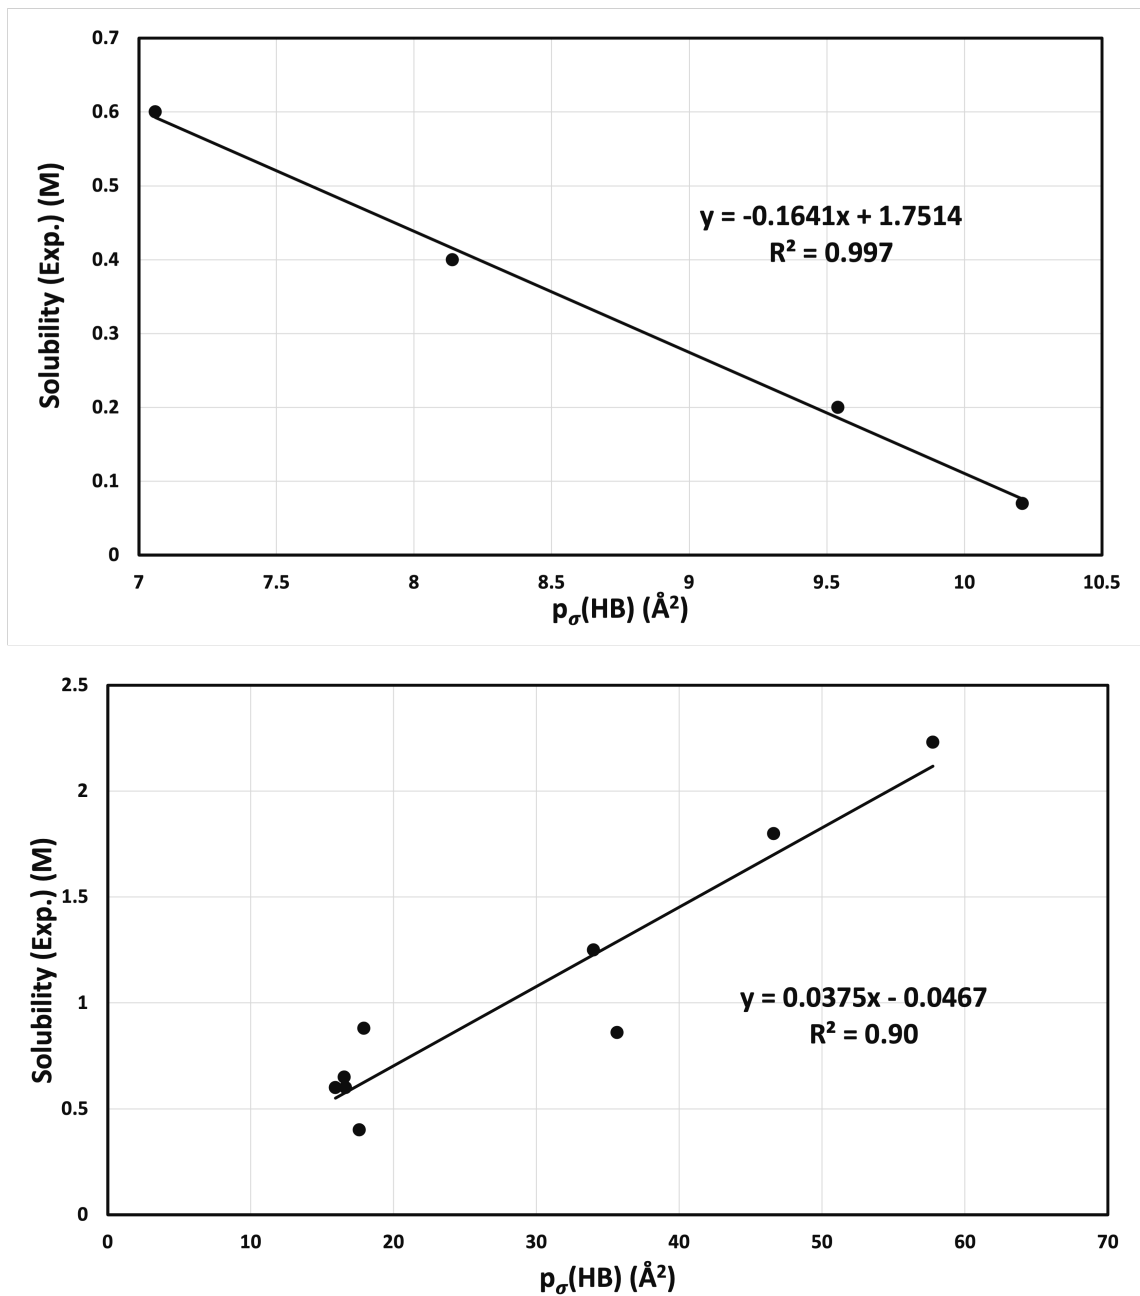

Figure. S 16: The experimental solubility vs  $p_{\sigma}(\text{HB})$  for (top)  $\text{V}(\text{acac})_3$  in 4 different organic solvents and (bottom) 9 different metal complexes in acetonitrile solvent, respectively. These two plots correspond to the  $9 \times 4$  (36) screening model.

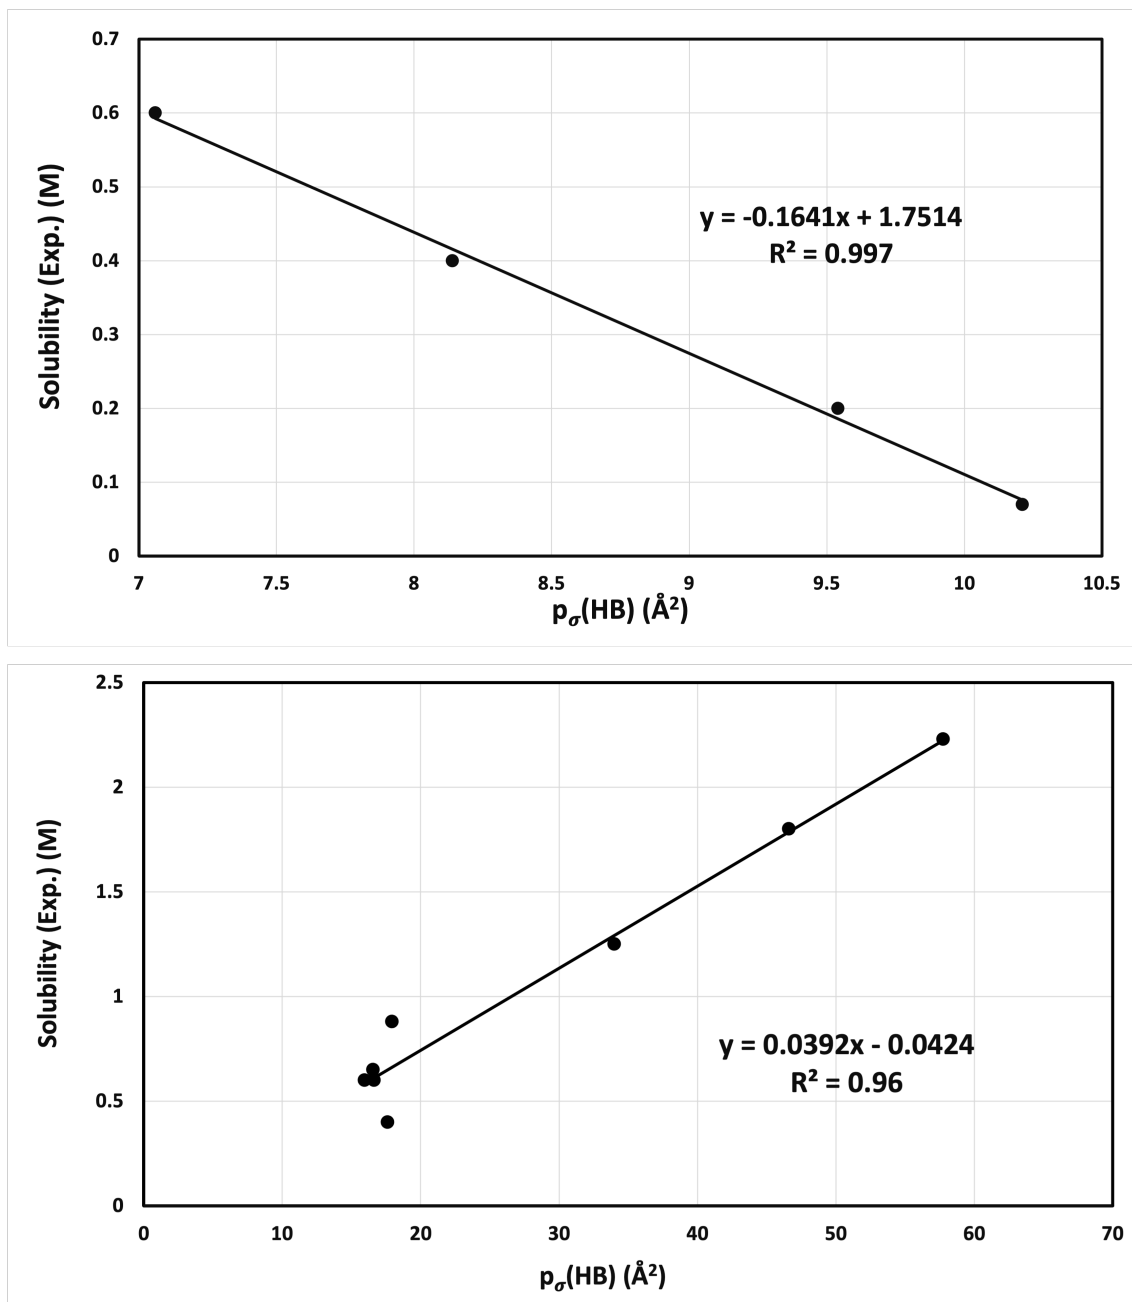

Figure. S 17: The experimental solubility vs  $p_{\sigma}(\text{HB})$  for (top)  $\text{V}(\text{acac})_3$  in 4 different organic solvents and (bottom) 8 different metal complexes in acetonitrile solvent, respectively. These two plots correspond to the  $8 \times 4$  (32) screening model.

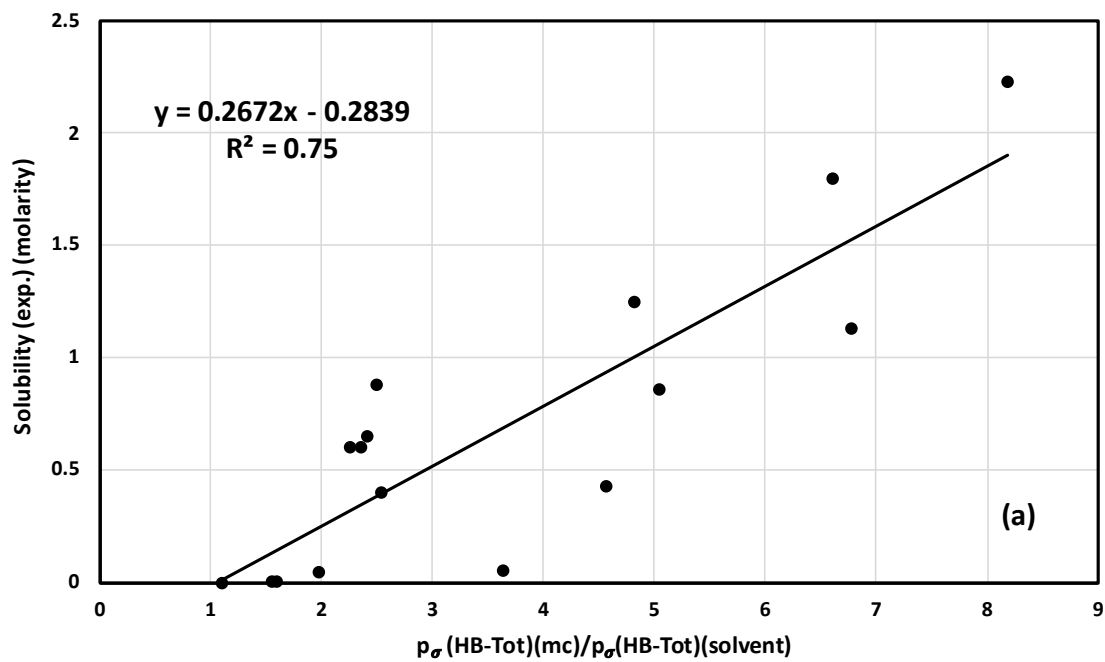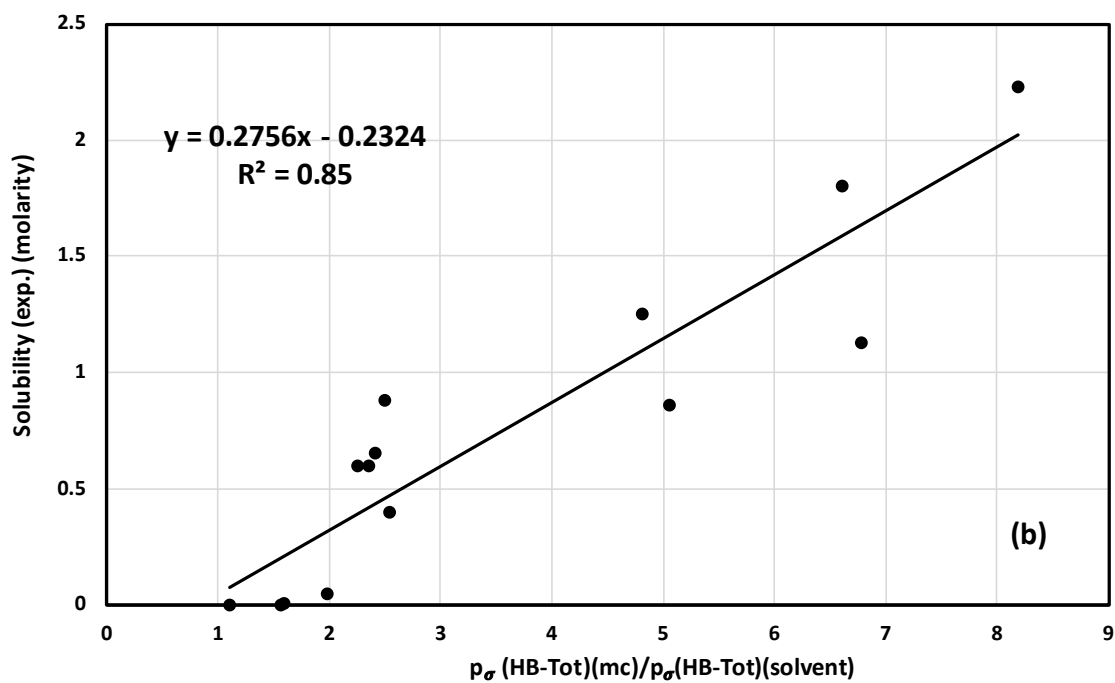

Figure. S 18: The experimental solubility vs  $\chi$  for (a) 16 different metal complexes and (b) 14 different metal complexes, respectively. The definition of  $\chi$  has been given in section 6 in the main manuscript.

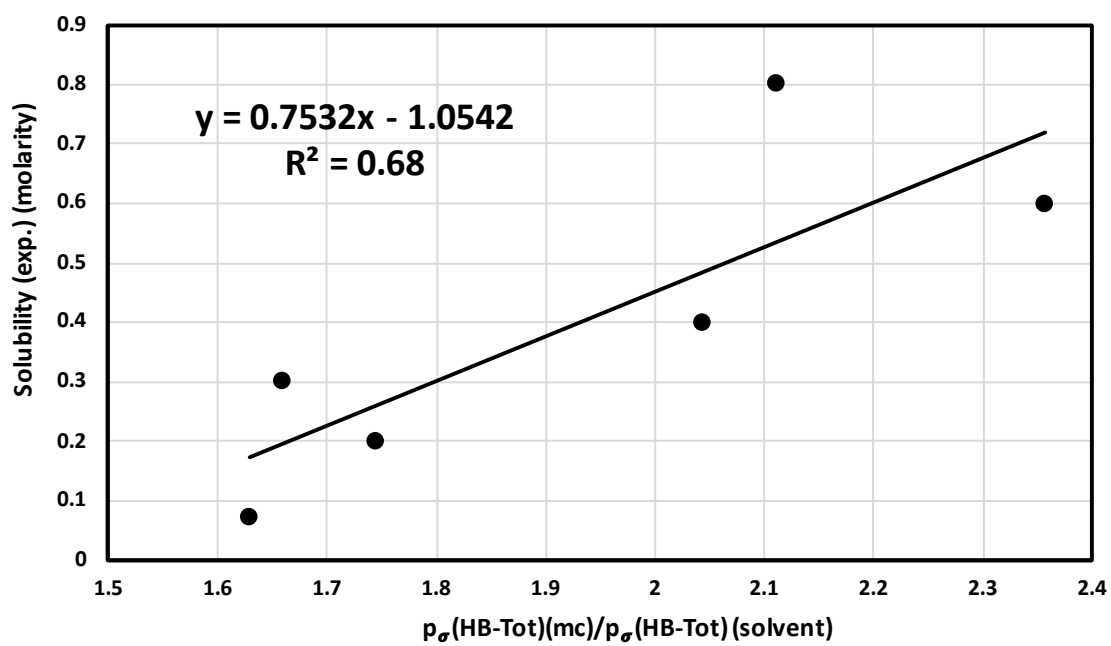

Figure. S 19: The experimental solubility vs  $\chi$  for  $\text{V}(\text{acac})_3$  in 6 different organic solvents. The definition of  $\chi$  has been given in section 6 in the main manuscript.
